# Supplementary material for: A Full-Genomic Sequence-Verified Protein-Coding Gene Collection for Francisella tularensis
Source: PLoS One. 2007 Jun 27;2(6):e577. doi: 10.1371/journal.pone.0000577 (PMC1894649; doi:10.1371/journal.pone.0000577)
Supplement: Table S2 — Complete clone list (1.71 MB XLS) [file pone.0000577.s002.xls]

## Sheet: FT_supplemental_table1
FTT number	HIP Clone Name	PlasmID CloneID	Genbank accession number	Gene Symbol	Product	Clone Sequence
FTT0001	FLH231508.01X	FtCD00039385	DQ681375	dnaA	chromosomal replication initiator protein dnaA	ATGGCTATCCTTTATATTTTAAGGGTTATTAGGATATTTTTTATTATGACTACATGGGATAAATGTTTAAAAAAAATAAAAAAAAACCTTTCTACGTTTGAGTATAAGACGTGGATAAAGCCTATCCATGTGGAGCAAAATAGTAACTTATTCACAGTTTACTGTAACAATGAATATTTCAAAAAACATATAAAATCTAAGTATGGAAATCTTATTTTATCAACAATCCAAGAGTGTCATGGTAATGATTTAATTATTGAATATTCTAATAAAAAATTCTCTGGCGAAAAAATTACTGAGGTTATCACAGCTGGACCACAAGCTAATTTTTTTAGCACAACAAGTGTTGAGATAAAAGATGAATCAGAAGATACAAAAGTAGTACAAGAACCTAAAATA…
FTT0002	FLH204847.01X	FtCD00023002	DQ681376	dnaN	DNA polymerase III, beta chain	ATGAATTTTGTACTAAATAGAGATGACTTACTAAAGCCTTTGCAATCTATGCTCTCAGTTGCAAATAGTAAGAGTACAATGCCTTTATTATCATGTATCTTATTTGATATTGATAATAATAATCTCAAAATTACGGCTTCGGATCTTGATACAGAGATATCATGCAATATAGCAGTTAGTTGTAACACAACTATTAAGTTAGCATTAAATGCTGACAAAATTTATAACATTGTCAGAAGCTTAAATGAAAATTCAATGATTGATTTTAGAATTAATGAAAATAAGGTAACTATTGTTTCTAATAATAGTACTTTTAACCTTATATCACTAAATGCTGACAACTATCCTCTTATTGATAGTAATATCAATGAGCAAGCAAGTTTTGATCTTTCTCAACAA…
FTT0006	FLH150164.01X	FtCD00020322	AY774739		Proline/betaine transporter, major facilitator superfamily (MFS) transport protein	ATGCGTATTAAGTCAGTAATTATCTCGAGTATTGGCAGTACTTTTGAGACTTTTGATTTTCATATATTTGGTTTATTTGCTTTGCAGATATCAATGTCGTTATTGCATAAAGATTCTTTTAATAGTTCTCTTATCTTGATTTTTGCTATTTTTGGCGCGGGTTATTTTGCTAGATCTCTGGGAGCTATATTTTGGGGTAATTTTGGCAATAAATATGGTCGTACCGTACCGTTTAAGTGGACGGTTATTCTAATAGGTGTAGCATCTTTAGTAATAGCGGTATTGCCAAGTAGTAGTGTTATTGGTGTATTTTCGCCATTGATATTAGCAGCTTGTCGTTTAATTCAAGGTTTTTCATTCGGAGGTGAGCTAATTGCTGCAGTTTTATTAGTCTATGAG…
FTT0007	FLH204889.01X	FtCD00023035	DQ681379	aspS	Aspartyl-tRNA synthetase	ATGGATATGAGAACACATTATAGTTCAGATATTAATGAAAAATTACAAGGACAAAAAGTTACAGTATGCGGTTGGGTTCATCGTCGTAGAGATCACGGTGGTGTTATTTTCTTAGATATTAGAGATAGAACTGGTTTGGTACAATTAGTTTTTAACCCTGATAATGACAATTTCAAAGTTGCTGATAGTTTAAGATCTGAATTTGTGATTAAAGCTGAAGGTGTTGTTAACTTAAGACCAGAAGGTCAAGAAAACAAAAATATTTCTAGTGGTAAAGTTGAGATAATTGGTGATAGTATAGAGGTTATTAATAAATCTAAAACTATTCCATTTCAGTTAGATGATTTCCAATCAACAGGCGAAGATGTCAAACTTAAGTATCGTTATATTGATCTGCGT…
FTT0013c	FLH151444.01X	FtCD00020451	AY774927		hypothetical lipoprotein	ATGAGAAAAATATTCTTTTTTTTAATTCCAATAATACTATTATCTAGCTGCTCAACTAGCAATTACACTCTAATCAAAGGTAGTGAATATATATCTATGCAACCAAATACTCAATACCTCTACAAAAGAACAGCTCTTAAAGCAGATAAATCAATTTTTATTGATATAGATATACAATCTTGTAACAGTGATCAATCAAAATGCCAATACTTCGTAAGCGTAAAAAGTGATAAAGGTAAAATCTTGGAGCAATATTACGAAACCTATTATGTAAATTTCTTTGGTGATGTATACCTAACAGATAGCTTATACCCCAATGGCACACTAATATTACCAGCTAGAATTAGACTAGGTGAGGAATTACTTTTAGATAATGGTGATAATTATGGTCCAGTACAA…
FTT0014c	FLH150128.01X	FtCD00020317	AY774716		hypothetical protein	ATGAAAGAGCTTATAGTCACATCTACATTTATAACTGCTTTGGTATCTGTGAGTTATGCTACCGAGCTAAAAGGTAGCGACTATATTTCAACTGAGGTTGGCTCAACATATAACTACCAGCGCGTAAATGCTGATGATCAAGATAAATTCACAATCGAAACTACTATTAAAAGTTGTAATAATGCTAAAACTTCATGTGATTATGTCAGCCAAATCAAAGATGTCAACGGTAAAACTAGTGCTAATTCAAGCTACCAATATAGCTATGTTGTTAGTGCTGATGGCGCTGTTTATATAACCTACCCAAACTCACAACAACAAACTCTACTATTACCAGCTAAAATTGAATTTAATAAAATCAGAAACGATAACGTTACAAATGCTGATACGAATTCATAG
FTT0015	FLH204865.01X	FtCD00023019	DQ681382	purB	adenylosuccinate lyase	ATGATAAAAAGATATGACGTAGCAGAAATCTCAAAAATTTGGGCAGATGAGAATAAATATGCAAAAATGTTAGAGGTTGAGCTTGCGATTTTAGAGGCACTTGAAGATAGAATGGTACCTAAAGGTACAGCTGCGGAAATTCGTGCTAGAGCACAAATTAGACCTGAGAGAGTTGATGAGATTGAGAAAGTTACAAAGCATGACATCATCGCATTTTGTACCTCTATTGCGGAGCAATTTACAGCTGAAACTGGCAAGTTTTTTCATTTTGGTGTTACATCTTCAGATATTATTGACTCTGCTCTTAGCCTACAAATTCGTGATTCTATGAGCTATGTTATCAAAGATTTAGAGGCGCTTTGTGACTCGCTACTTACTAAGGCAGAAGAAACAAAAGAA…
FTT0016	FLH204868.01X	FtCD00023022	DQ681383		hypothetical protein	ATGTATAATGTTGTTAAGTTTGGATGCCAAGAGCGACCTGAAATAAGTAGTGTAGAAGAGCCAACAAAGCCATTAGCAATACAAGATAAAAAAACGAAGGATAATGTAATGACTTTTTGGCGACAAAAGCTTACATATGTTGGCTGTGGAGAAGAAAGAAGTGTGACGTTACATTATTTTATATATAATAATGAAAATCCTAAAAAAGTATATTATTCTATAAAAGCAAAGAATGATTCTATACCTTTAAATAAAACTATTTTTGAAGGATCTTTTACTTCATTAGTATTAAGAAATGACGTGTTAAACGATGTTGTTAGATTTTTATATTCTAAGAAATGTAGCATGCCTGAAGACAAACTAAGGGATCATATTAAATATTATACTGCTTCTGCTTTA…
FTT0017	FLH150264.01X	FtCD00020333	AY774746		conserved hypothetical membrane protein	ATGTTATATAGACAAATAAAAACAGTTTTAAAAATTCCTAAACACACAGTGTATTCACTGGTTATATATAGTATATTATTAGGTTTTTTATCCCTTACTGTCCCTGTTTCAGTGCAGACTTTGGTAAATCTGGTTGGTGTAAGCTTATCGATTAGACCAGTTATATCGCTAATAACAATTTTATTTATCTTTTTAACGGCAGCTTTCTTTGTTAGAATTTTTCAATTAAAGCTCGTCGAGGATATCCAAAGGAAGGTTTTTGTCGAAACCGTGCTTAGGATAATATCAGCTATTTATAAAGTTGATTTTAATGATTTGATAAGGGTTAATGTTAGAGAGAAAATTAATAGAGCTTTTGAGCTAAAGTTTTTACAAAAATCTGTTTCTGTGATATTTATA…
FTT0018	FLH204845.01X	FtCD00023000	DQ681384		Secretion protein	ATGATGCAGTTAAAATCTTTTGAGATGCTAAAGAAGGATCTTAGCTTTAAGAAGATAATTTTGCTAGTGTTACTAAGCATTATTGTCGTAGGTGTTGTCTTAGCAATGATACCATGGCAACAGACAATCGATGGTTATGGTGATGTTACAACTCTTTCACCATCTGAACGTCAACAGAATATCTCTGCACCAATTGGTGGTAGGTTAGGTAAGTGGTATGTCTTTGAAGGGGATTCGGTTAAAAAAGGTGATCCGATTGTTGAGGTTCTAGATTTGGATCCAGAAGTTGTCTCAAGACTAGAAGAAGAAAAATCAGCAATTGAACTGGGCATCAATTCTGTAAAATTAGCGATAAAAAATACAAAGAATAATATTGAAAGACATAAGTACCTTGTTGAT…
FTT0019	FLH150025.01X	FtCD00020307	DQ681385	gatC	Glu-tRNAGln amidotransferase C subunit	ATGGATAAAAAATTAGTAAAACATATTGCTAAACTATCTTGTTTTGATTTGACTGAAGAGCAGTTGGAGCAGTATACCAAAGATCTTATCAATATCTGTAAGATTCTTGATACAGTCAAAAATTTCGATGCTCAAGGAGTCAAGCCGATGATATCACCAATTAGTGTTGATTTTAAATTTCGTGAAGATATCCCTCAAGATCAAGATAATCGTACAAGTTTTGATAAATTCGCTTGTGAAGTTGTTGATGATTACTTTATGGTGCCACAAGTTGTCAAATAG
FTT0020	FLH150242.01X	FtCD00020330	AY774731	gatA	Glutamyl-tRNA(Gln) amidotransferase subunit A	ATGTCATATATTAAGAAATTAAGAGCTAGATTAGATAGTGGTGAAATAAGCGCTGTTGAACTAACTAAAGAGTATCTAGCAAAAATTAAAGAGCAAGATAAGCGCATAAACTCTGTAATCACTCTATGTGAAGCAGAAGCACTAAAAGAAGCAGAAGATGCTGATGCTATTATTTCTGCAGGTAAGCAAGGATTATTAACAGGAATTCCTATTCTACATAAGGATCTTTTTTGCACTAAAGGTATAAGAACTACGGCTGCCTCTAAGATGTTGGATAATTTCGTAGCACCATATGACTCAACAGTGACAAAAAACTGTAAGGATCAAGGTATGGTCACTCTAGGCAAACTAAATATGGATGAGTTTGCTATGGGTTCAACTAACGAGTATAGCTATTAT…
FTT0021	FLH204873.01X	FtCD00023026	DQ681386	gatB	Aspartyl/glutamyl-tRNA(Asn/Gln) amidotransferase subunit B	ATGAATTGGGAAATGGTGATAGGGCTAGAAGTCCATATTCAATTAAGTACTAAATCTAAGCTATTTTCGACTTCTGCAACAAAGTATGGTCAACATCAAAATACTCAAGCAGCATTTTTAGACTTAGGTTTGCCTGGAACGTTGCCTGTTGTAAATAAAGAAGCTATTCGTAAAGCAGTGATATTTGGCTTAGCTGTAGATGCTAAGATATCAAAGGATAGTTTCTTTGCGCGAAAAAATTATTTCTATCCAGATTTATCAAAAGGTTATCAGATTAGTCAATCAACTAATCCAATAGTCCAAGAAGGTAGATTAGAGATTGAAACTTCAAAAGGACTAAAAACTATCAGAATTGAGCGTGCACATTTAGAAGAAGATGCCGGTAAGTCTGTGCATGGT…
FTT0022	FLH150144.01X	FtCD00020320	AY774726		hypothetical protein	ATGAATACGAATAAATTTTACTATGAACTTATGAAGCTAAATGTTTTAAGTAGTAGCTATGTTGATGATAGCTATAAAGCAGCGTGGCATGGAAATGTCTATCCTTTTTTTCATGATAGCAAATATGAATTTCATTATGAGGTTGCAAAGTACTTTGATAGAGCAGATGAAAAGACTATCGATAAATTATGCTCTCTACTAGATGATTATGTTGATGAAAGAGCAGACTTTAGTGACTTTGAAGCAAAAGTCGAAAAAGTCGTTGGCAAAGGTAATGTCTATTATGTGCTAAATTATATTTTTAGAGCTGGGCAATATAAGAAACTTTTAGAAAATATTAGGCTAAATAAAATTCATTTTAGCCAACATTTTATCGATCGCTTTGAAGCTGGTGGATAT…
FTT0023c	FLH204829.01X	FtCD00022988	DQ681387		Lipase/acyltransferase	ATGTTCTCTAATGGTTCTATTTGGATAACTATGCTCAATGGATTCCTAGAAAATAAAATTCCAATTAGCAATTATGCTGTTGGAGGTGCTACGGCAGTTTTTGAGCCATCATGGACAGATCTAGGATTACCTTATACATTAGGTACAGAATTAAGAGCATATGCAATAGACAAAGGTGCTCATGACACCAACAAAAATTTAGCAATATTTTTTATTGGAGCAAATGACTATTTAACAATATCCGCAGACCAAGACCCAACCTCTCTTCATATTATTGCCTCAGAAGTAACTGATAAAATCATAGCAGCAGTTAACAAAGTAAATGCTCAAATGACATTAATAATTGGATTACCTAATTTGGGCTTAACCCCTGAATCAAAACAGATTGGAAATCAAAAC…
FTT0024c	FLH204828.01X	FtCD00022987	DQ681388		hypothetical protein	ATGGAAAATAGTTTATTAATCAGTAACTTTAAACAATGGTTATTTTTAATCTTGTTATCGAGTATCTCTATAAGTAGTATTTGCTACAGCAATGCCAGATCTGAAATCATTATAGAAAATAACTGCTCAGTACCAATTTTTTTAAATGTTGCTCCTGGTAATAGCACCGGTAAAAAGATAGACAATCAAAAGTTACTTGCTAATGAATATATTAACCTCGGCCAGTATACAAATGATAAAATCTTTAATAATACATCGATAATAAATATCAATTATCATTCGGAAAATTTACAGAATAATGGTTCGATACAATTCAGTTTAAAAAAATGGCTGGAAATCAAATAG
FTT0025c	FLH204885.01X	FtCD00023032	DQ681389		hypothetical membrane protein	ATGCTAAATAAAATTAATATAGTATTTATATGCTTTTTAGTATTATCAATTACCCCCTTTATGGGGTTTTCTAACAGTTTTAAAAACTCTAATGAACAATCGCAAAAATCAAACTCAATTGATAAGCAAGGTATAACCCAACTACAATCACAAATAGCAAATATTCAAGCTGAAATAAATCATTTAACCCAAATAAAAAACTCAAATAATTCAGCACAATTTGCTACATACAGTTCAAAAGTCGAAAACATTGGTCTACCTAATAGCTTACCTGATAATAATAAATTAACTCTTGATATAATGACAAATATAGATTCTGATAGTTCTATCATAAATCTAAGTGATTGCTCTATTGGTGGTATCTTTGACAAAGATGGTGGTATAAACGTTGGTGGTGCA…
FTT0026c	FLH150140.01X	FtCD00020319	AY774725		conserved membrane protein	ATGCAGATTGATAATAAAAATTTTAAATATATCCCTTTACTTGTTCTTTTAACATGGTTTTTAGGTAATATGGGCGTACATTTCTTGCTGCCATTACTACCTTTACTCTCAAACAACCTCGATGCATCTGTAAAACTAACTCAGTATGTAATAGCTTTCTTCTTAGCTGGTAAGGCTCTAGGAATGATAGTCTATGGGCCACTATCTGAAATCTATGGTCGCCGTAAATTTATGCTTTTTGGTCTAATATTATATATGTCAAGTAGTCTGTTATGTATGCTAACAACAGATATATACTGGTTAATCTTTTGGCGTTTTGTTCAAGGACTCGGTGTAAGTGGTACTATACTTATGGGTAGGGTTATTATTAATGACTCATATCCAAATGATAAAGCTGCT…
FTT0027c	FLH150196.01X	FtCD00020326	AY774704	lysA	diaminopimelate decarboxylase	ATGTCTAAACTAAGCGTTTCAAAGAGTGTTTTTAGTAAACTTTCAAACAAACAAATTGAAACAATTATTCAAAGATATGCTTCGCCATGCTTTATCATCGATGAAAATGCGCTGCTAGAACGAGCTAGACTTTTTCAACAAGCTATTTTAAATCAATATCAAAATAGTATTGCCGCATACTCAGTAAAAACTCAATCTCTAAACACTATTATTCAAAAATTTTATGAAGTAGGATTTATCCCAGAGGTTGTCTCGAGTGATGAGTTTGAGCAAATACAAAAACTACAACTATGTGATAAAAGTATAATCTTTAATGGTCCATATAAAAATGATGCAAGCTTAATCAAAGCATTACAATTAAATGCTATGATAAACTGTGATCACTTTGATGAAATATTG…
FTT0028c	FLH150202.01X	FtCD00020327	AY774707		conserved membrane protein	ATGAATAATCATATAAAAGCACAACTACTGTTACTATGCTTTTGTCAGCTTATAATCATAGCAGCTATGGAAATGAGTAATCCTTTTTTACCAATTTACTTACAATCCCTCGGCGATTTTGATCTACTACCAGTAAATGCCTGGAATGTCTTAGCTTATGCAATGCCTTTAATATCAGCAATGCTTTTCTCTCCTTTTTGGGGTAAATATGCCGATAGATTTGGCTATAAAACAATGATCCTTAGAGCTGCCTTAGCTTTAGCTATTATACAATTGCTGATATATCTAACAAATAGTGCTTTGCTATTTATAACCCTAAGATTTATCCAAGGAGCTATAGCTGGATTTTTATTAGCAGCTCAAAGCTATGCTGTAGTTATTGTTTCAAAAGAATTTAGA…
FTT0030c	FLH150442.01X	FtCD00020350	AY774797	fur	ferric uptake regulation protein	ATGAACTCGAAAAACCTTGACTTAAAAGAATTCGGTTTTAAAGTTACTCAACCTCGTGTTGAGATACTTAAATTATTTGAAAAAAACAAAGATAAGCATTTGAGTCCTGATGATGTTTTTTCTAAACTTAAAGCGCAAGGCAGCACAACAGGAATCGCTACAGTTTACAGAGTACTTAATCAGTTTGAGTCAGCAGGAATAATAAATCGCTTAAAACTTGATAATGAACAAGTAATGTATGAGTTAAATCAAGGTGAGCATCATGATCATATAATCTGTGTTAAGTGCAATATGATACAAGAGTTCTATAGCCCAGGAATCGAAGCTCTGCAAAAGCAGATTGTTGAATCATTCGGTGCTGAAATGATTGACTATAGTCTCAATATATATGTTAAATGC…
FTT0031	FLH150418.01X	FtCD00020348	AY774783	nuoA	NADH dehydrogenase I, A subunit	ATGAGTACAAGTGTTTATGAGCAATTTGCCCCTATACTGATATTCTTGATTATAGCTTTCGGTTTAGGTGCTGCTTTTGCAATTATTGGCAAAGTTTTATCAGTGATTGTTGGCGCAAATAATCCAAATAAAACCAAAGGAGAAACATTTGAATGTGGTTTTCCGACTTTTGGTGATGCAAGAGAGAAACTTGATGTGCGTTTTTATCTAATTGCAGTATTGTTTTTGGTTTTTGACTTGGAGTTGGCATTTATTATCCCATGGGGAATAAATCTACGAGCTAGTGCAGGAATGCCAGCTATTTCAGATCATGCATTTTTTGCGATGATTATATTTTTAGTGGTGTTATTCTTGGGCTTAATATACGCCTGGAAGAAAGGAGCTTTAGAGTGGGAATAG
FTT0032	FLH150498.01X	FtCD00020356	AY774773	nuoB	NADH dehydrogenase I, B subunit	ATGGGAATAGGTAACGAAAACAAAGGTTTTATAACTGCAAGTGCGGATGCACTTATAAACTGGGTGCGTACAGGATCTTTATGGCCGGTAACAACTGGTTTGGCTTGTTGTGCTGTAGAAATGATGCACGCAGGTGCGGCTAGGTATGATCTGGATAGGTTTGGTATAGTCTTTAGGCCTTCTCCAAGGCAGTCTGATGTGCTTATTGTTGCTGGGACTCTTTGCAATAAAATGGCTCCGGCGCTACGCCAAGTGTATGATCAAATGCCTGACCCTAAGTGGGTAATTTCTATGGGATCTTGTGCAAATGGTGGTGGTTATTATCATTACTCGTACTCGGTGGTTAGGGGTTGTGATAGGATTGTGCCTGTTGATATATATGTGCCAGGTTGTCCTCCT…
FTT0033	FLH204874.01X	FtCD00023027	DQ681390	nuoC	NADH dehydrogenase I	ATGATCGTGAGTACTAAATTACAAGATCATTTTGATAAAATAACAAAGATTTTGAGTGGCTTTGGCGTTGAGGGCTGTATATCTTATGGCGAGATAACTTTTTCTATCAGGGATCAGCGTGATATTCATTTAATTTTAAAAAAACTTAAAAAAGAGTATCTTTTTGAGCAGCTTACAGACGTAACAGCTGTTGATTATTTGACCTATGGTCAGTCAGACTGGCAGGTTGGTAAGGTTGTTTCACAAACAGGTTTTTCTAGAGGGCGTCAGCAAGATTTCAAAACCGCTGCTGTGGATAATAGATTTGAAATTATTTATCAGCTACTAAGTATGGCAAATAATGTCAGAATTAGAGTTAAGTGTAAACTAAAAGATGCGCAGATCATTTTGGTTGATTCT…
FTT0034	FLH150521.01X	FtCD00020360	DQ681391	nuoD	NADH dehydrogenase I, D subunit	ATGGCAGAGTTTAAAAACTATACACTAAATTTTGGACCAGTTCATCCTGCAGCGCATGGTGTTCTTAGGCTTATTTTAGAACTTGATGGCGAAAATGTTGTGCGAGCTGATCCACACGTTGGATTGTTGCATAGAGGTACAGAAAAACTTGCTGAATTTAAGCCATATAACCAAAGTATTGGTTATATGGACAGGCTTGATTATGTCTCGATGATGTGTAATGAGCATGCTTATGTGATGGCGATTGAAAAGCTTTTACAGTTAGAAGTTCCCGAGAGGGCTAAATATATTCGCGTAATGTTTGCTGAGATGACTAGAATTTTAAATCATCTATTATGGGTTGCAGCATGTGGTATCGACCTTGGTGCAATGACTGTGTTTTTGTATGCTTTTAGGGTC…
FTT0035	FLH150530.01X	FtCD00020363	AY774794	nuoE	NADH dehydrogenase I, E subunit	ATGTCTTTAGTAGATTTAATATCGCCACAAGCGAGAGAAGATATTGACAGGGTTTTAAGTAAGTTTCCAGCTGATCAACGAAGATCGGCGATATTGGAGGGCTTGCATATTTTGCAAGATCAAAATGGTGGCTACTTAACCGATGATTTGCAAACAGCTTTAGCAGAGTACTTACAGGTTAGTAAAGTTGATGTTTATGAGGTTGCTACATTTTATTGTATGTATAACCTAAAACCGGTTGGAAGACATAAATTGAATGTATGTACAAATGTTTCATGCATGTTAAATGGTGCTTATGAAATTTTAGCGCATATAGAGAAAAAACTTGCTATTAAGCCTGGCGAGACCACTAAAGATGGTCGTATAACTCTAAAAGAAGTTGAGTGCCAAGGTGCGTGC…
FTT0036	FLH150535.01X	FtCD00020364	DQ681392	nuoF	NADH dehydrogenase I, F subunit	ATGGCAAATGAAGTTTGTTTTCGTACTCTACATTTAGATAAGCCATACAGTTTGGAGTCTTATTTATCTGTGGGAGGGTATTCCTACTGGAATAAAATATTGACAGAAAAAATTCCACCTGAGCAAATTATTGAAGAGCTCAAAATATCTGGGCTTAGGGGTCGTGGTGGTGCTGGTTTCCCTACGGGATTGAAATGGAGTTTTATGCCACGTAATGCTCCGGGGCAGAAATACGTTGTATGCAACTCTGATGAGGGTGAGCCTGGTACATGTAAGGATAGAGAAATTCTTAGGAATAATCCTCATCAATTGATTGAAGGTATAGCTATTGCTGGATATGTTGTTGGGGCTACTGCAGGCTATAACTATACTAGAGGCGAGTTCTATGAGCCAATAGCT…
FTT0037	FLH153616.01X	FtCD00020663	DQ681393	nuoG	NADH dehydrogenase I, G subunit	ATGTCAGACAATAAAGAATCCAAAAAGATAAGTATAGAGATTGATGGTAAGGATTATCAAGCCCTACCAAACCAATCGATAATTGAAGTGGCAGATGCAAACGGTATATATATTCCGAGATTTTGCTACCATAAAAAATTATCTGTAGCGGCAAACTGTAGAATGTGTTTGGTAGATGTTGAGGGTGCAAGACGCGCTTCACCAGCATGTGCAACACCAGTTATGGATGGAATGAAAGTTAAAACTCGTTCAGAAGAAGCATTGCAAATGCAAAAAGATGTTATGGAGTTTTTGCTTATAAATCACCCATTAGATTGTCCTATCTGTGACCAAGGTGGCGAGTGTGAGCTACAAGATATTGCGATGGGTTATGGTAATACAACGTCAGAGTATCTTGAG…
FTT0038	FLH150454.01X	FtCD00020352	AY774807	nuoH	NADH dehydrogenase I, H subunit	ATGCTAGGGTATATTTTATGGACATCACTTTATGTATTGTTGATAGTCATTCCTTTGATACTAGTTGTTGCATACTATACATATGCAGAGCGTAAAGTTATCGGTTATATGCAAGATAGAATCGGTCCAAATAGGGTAGGATCTTTTGGTTTATTGCAACCTATATTTGATGCGCTTAAGCTTTTTCTCAAAGAGATTATAGTGCCAACAAATTCAAATAGATATTTATTCTTTATTGCACCGATTTTAGCTTTTGCTCCGGCATATGCTGCTTGGGCGGTGATTCCTTTCTCTAAAGGTGTTGTTTTATCTGATATGAATCTCGGCTTACTATATATATTGGCAATGACTTCATTTTCTATATATGGGATAGTAATTGCTGGTTGGGCATCAAATAGT…
FTT0039	FLH150522.01X	FtCD00020361	AY774789	nuoI	NADH dehydrogenase I, I subunit	ATGAGAAATATAACAAATTTTTTAAAGACTTTTCTACTTTGGGAGCTTCTAAAAGGGTTAAAAGTAACCGGTAAGCATTTTTTTACTCGTAAGGTTACAGTACAGTATCCAGATGAAAAAACTCCTATTTCTAATAGATTTAGAGGTCTACATGCCTTAAGACGCTATGAGAATGGCGAAGAGAGATGTATTGCATGTAAATTATGTGAGGTTGTTTGTCCAGCATTGGCAATTACAATCAACTCCACAGAAAGAGAAGATGGTACCAGAAGAACTTCAAGCTATGAGATGGATTTATTTAAGTGTATCTTTTGTGGCTATTGTGAAGAGTCGTGTCCAGTTGATTCTATTGTTGAGACAAATATCTTAGAATATCACTTCGAAGAGCGTGGTGAGAAT…
FTT0040	FLH150594.01X	FtCD00020375	AY774775	nuoJ	NADH dehydrogenase I, J subunit	ATGGTTGTAACAGTTATTTTATTTTATACTTTTGCGTCACTTGCTATCATTTTTGCTTTAGTACTGGTTTTAGCAAATAATCCAGTAAATTCTGTAATAGCAATGATTTTTACATTCATATTTACAGCTGCAGTATGGATAATCTTACAACAAGTATATTTAGCATTATTACTTATAGTGGTTTATGTTGGTGCTGTGTTAGTGATGTTCTTATTTGTAGTCTTTATGCTAGATTTGCATGTTGAGGAACAGGGTAGAGTCGGTAGATTTTTCTATGCTCTAGCTGCTGTGGTTGTCTGTGCTATATTTGCTACAGTTATAAGTTACGCTGCAACAAATGTTTTTGCCGGAGCTATGATGCAAGGCGGAGTCGGTGGTCTTAAGATCATCGGTCTAACT…
FTT0041	FLH204826.01X	FtCD00022985	DQ681394	nuoK	NADH dehydrogenase I, K subunit	ATGAGGGCGCTAAAGATGAATAGTATTTCAGTCTCAGTCACACACTGGCTGATTTTTAGTACACTTCTGTTTGTGATAAGTGTTGCTGGTATAATTATAAATAGAAGAAATATTCTTATATTATTGATGTCGATAGAGTTAATGCTTCTAGCAGTCAATACTAATTTTTTGATATTTGCTAATATGCATCAGCAGGCAATGGGTGGAGTTTTTGTATTCTTTATAATGGCAGTAGCTGCTGCTGAGACAGCAATTGGTTTAGCAATTGTTGTGGCAATATTTAGAAAACGCAAAACTATTGATTTAAGTAAACTTAATACACTAAGAGGTTAG
FTT0042	FLH229990.01X	FtCD00039265	DQ681395	nuoL	NADH dehydrogenase I, L subunit	ATGATAATAAACACTCAAGTAGCAGCTGTATTAATCGCAGTTATAGTTCTAGCACCTCTATTAGGTGCATTGATAGCTGGGTTTGGTGGTAAATCGGTAAAAAATGCAGGTGTTAACTTTTTCACAATTTCTCTATGTGGTCTGTCTTTTGTCCTTAGTGTGATTTTAGCTTATGGTGTTTTTAGTGGCGCTGAAGTCTATTCTGTTAGCTTTTATCAGTGGGCTCCTATTTCAAATATGTTTGCCTTTGATGTTGGCTTTACTGTAAATAAGATAACTGTGTATATGATGTTGATAGTAACATTTGTATCAACACTAGTTCATATTTACTCGATTGGGTATATGAAAGGCGAAGAAGGATATGCAAGGTTTTTTGCATATATTTCAGGTTTTACATTT…
FTT0043	FLH150622.01X	FtCD00020377	DQ681396	nuoM	NADH dehydrogenase I, M subunit	ATGAATTTAGGTAATTACTTATTAAGTTTAATAATCTGGCTCCCAATAGTTGGTGGTTTTGTTGTTTTGGCGACAAGAACCAAAGAGTTGCATGGCGATGCAGCACGTTGGGTAGCATTAGTCTTTAGTTGTTTAACTCTAGCTTTATGTGTTCCGTTAGTTACATCTTTTGATTATAGTAGTTCAGCAATGCAGTTCCAAGAATCAGTAAAATGGTTTAAGGTTTTTGGCATGCATGATATTTACTATAGTTTGGGAGTAGATGGATTTTCTGTATTATTTATAGTTTTGACATCTTTTGCTACATTAGTGATAGTTTTAGCTGCTTGGACATCTATCAAAACTAAAGTTAGACAATACATGGCGATATTTTTGATTACATGTGGTTTGACTAATGGC…
FTT0044	FLH204877.01X	FtCD00023029	DQ681397	nuoN	NADH dehydrogenase I, N subunit	ATGATTATGAGTTTATCAATCCTTTATATTTTGCCAGAAATACTACTAGCACTAGGTGTCATAGTTGTAATGTTTTCTGGACTTTTTCTACATGGTAAGATTAGAAACATTAACTATATTTTTTTCCAAGTATTTACACTACTTGCTTTGATAGCAACTTTTGCTAAAGAGTATCTGATACAGACTACTGGCTCAGCGTTTGAGGGTCAGGTTGTATTTAGTGGCTTTGCATATACATTACAACTAGTAATACTTGTCTTAGCAGTCTTTGTTGCATTATATTCAAGAGATTATGTCAAAGATAGAAAAATATCAGATGGTGATTTCTATACATTGTTAATGCTATGCGTACTTGGTGCAATGGTTTTAACAGCGGCACATAGTTTAGTTACAATATAT…
FTT0045	FLH150323.01X	FtCD00020338	DQ681398		hypothetical protein	CTGAAGGAAATTCTAGGACCGCTTAATGATGTAATCAAGAATTCAAAAGAAAATATTGTTAATAAGAGTTTGAAAAAGCTTGATGTTGTAAGTAGAGAAGAGTTCGAAGTACAGAAGAAAATTCTATTAAAAACTCGTCAAAAGCTTGAGCAGGTAGAAGCTAAGCTTGATAAGCTTTTAGCTGAGAAAAAATAG
FTT0047	FLH150470.01X	FtCD00020353	AY774756	hemE	uroporphyrinogen decarboxylase	ATGAGTATATTATTTTTGGATGCATTTGGCGAAAAGAAATTAGATAAGCCCCCAGTTTGGATAATGCGTCAAGCTGGTAGATATCTACCAGAGTATCGTGCAGTTAGGGCAAAGTTTGATAATTTTATGGATATGTGCCGCAATGCTGATGCTTGTTGTGAAGTTGCGCTTCATCCACTTCAGAGGTATGATCTTGACGCAGCAATTGTTTTTTCAGATATTCTGACAATTCCAGAAGCTATGGGGATGGACCTAAAATTTATAAAAGGTACGGGGCCAGTCTTTTCTGAGCCGATACAATCGCAAAAAGATTTAGATAAGCTAAAATCTATTGAAGATAGTATTGGTTCGCTAGATTATGTTTATAATGCTGTCAAGACTACTAGTTCAGCAATAAAT…
FTT0048	FLH204846.01X	FtCD00023001	DQ681399		hypothetical protein	ATGAAAATGTTGCTAGACGATTTATATGAGATAGTAGAACCCATCACAGCTGATCTAGGCTATATTTTATGGGGAATTGAAGTTGTAGGAAGTGGTAAACTTACCATACGTATTTTTATTGATCATGAGAATGGTGTTTCAGTTGATGATTGCCAAATAGTTAGTAAAGAAATCAGTGCAGTTTTTGATGTTGAGGATCCAGTTTCAGGTAAATATATTCTTGAAGTTTCTTCACCTGGGATGAATCGCCAAATTTTTAATATAATTCAGGCGCAAGCTCTGGTAGGATTTAATGTAAAGGCGGTTACTTTGGCTCCAGTTGGATCACAAACTAAGTTTAAGGGCGTGCTAGAAAGAGTAGAAGGAAACAATGTCATTCTAAACTTGGAAGATGGTAAA…
FTT0049	FLH204879.01X	FtCD00023031	DQ681400	nusA	N utilization substance protein A	ATGAGCAAAGAATTATTGTTAGTATTAGAAACTGTAGCAAATGAAAAAGATATCTCAAAAGATCTTTTATTTGAAGCTATGGAAGAGGCTTTGGCTATTATAACTAAGAAAGAACTTGATGAGCATATGAATATCGAGGTTAAAATCGATAGAGTTACGGGTGATTTCAAGGCTGATAGAGTTTGGCATATTGTTTCTGAAGATGAAGATTTAATTGATTATTCAAAAGAGCTTTATGAAGATGTCGTTCAAGAAAAAGGCTATAATGTAAAAGCTGGCGATGTTATGCGTGAACCTGTTGAGGTCAAAGAATATGGGCGTATAGCTGCGACAATGGCTAAGCAAATTCTAATGAAGAAAATCAAAAATTTTGAAAGAGAAAAGTCAGCTAGATTTTAT…
FTT0050	FLH153624.01X	FtCD00020665	DQ681401	infB	translation initiation factor IF-2	ATGGCAGAGATTACAGTTGGGCAGTTAGCACAGCAAACAAATAAAGAAGTAGATGCACTACTAAAACAGCTTAAATCTTTTGGTATTGAAAAATCTAGTGAGAAAGATACATTAACTCCTACGGAGATGAAAACTTTGCTAGAGAAGATTAATAGTGCGAAAAATACCGCAACAAGGAAGAAAGTAACTTCAGTGAAACTTGACGGCAAACATAAAATTAATGTTTCTGTCAAAAGAAAAAGGCGAGTTGCTAAGAAAGTGGAACAGCAAGAGTCTACTACGTTAGAACAGCCACAAGAGCTTGAAACTATGGTTCAAGAAGTCTCTCAGCAAGTAGATATCGTAAAAGAACAGGATAATATCGAGCAAATTGTTGAGAATAAAGAGGCTGTGAAGGTT…
FTT0051	FLH150450.01X	FtCD00020351	AY774802	rbfA	Ribosome-binding factor A	ATGGCTGCAGAGGGTAGAGTACAAAGAGTAGCGAGTGAGTTTCAAAAAGTTATATCTTTATTACTGCGTACTAGAATAAAAGATGCTAAGCTAGCTAGTGCAACTATTACAGAAGTGGATCTTTCTAAGGATCTATCTTATGCAAAAATATATTATACTTGCTTAGCTATTGAGGATGCTGAATATATTGACAAAGCATTTGAAAAATCAAAAGGTTTCTTTAGATCATCTATAGCTAAGTCATTAAGTCTACGAATTGTTCCAAATCTTAAGTTTATATATGACACTTCGCTTGATTATGGTATGCAGATGGAAGAAAAAATCCAGCAGGCACTTGAAGCTGACTCAAAAATTATCAAGCAAGATGATAAATCTTTACAAGAAAATTATAAGCAAAAC…
FTT0052	FLH152817.01X	FtCD00020571	AY774545	hisS	Histidyl-tRNA synthetase	ATGAGTAAGCTTACTATTGTTCGTGGATTTAATGATGTATTGCCACTAGACAGTTATAAATGGCAACTCTTGGAATCAAAAGTAAAACTCATACTTGATAGATATAACTACAGTGAAACAAGATTGCCTATTGTTGAGAGGAGCGAATTGTTTCATAGAAGTGTAGGTGAAAGTTCTGATATAGTTTCAAAAGAGACTTATGACTTTCAAGATCGTAATGGTGATAGCCTGACATTGCGTCCAGAAGGAACAGCTGGCTGTGTTAGGATGGTTATTGAAAATAATTTGGCTACTCGAGGCCAAACACAGAAACTATGGTATTGTGGACCTATGTTTCGCTATGAGCGCCCACAAAAAGGCCGCTATAGACAATTTTATCAGCTTGGGGTTGAGGCTTAT…
FTT0053	FLH152825.01X	FtCD00020572	AY774552		major facilitator superfamily (MFS) transport protein	ATGAAATTACATAATATAAAGGGCTATGCTTGGATTGTAGTTGGGTTAAGCTCATTTCTACTAATCGATAAATATATAATGAATGTTTCTCCTAGCTTGATTGCTAATGAGCTTATGAGTAGTTTTTCAATAAATGCTACTGAAATGAGTGCGATGGTTTCGTTATTTTTATGGTCTGTAGTATTTTGTCAATTTTTTGTTGCTGGACCTATCATTGATAAATTGGGGTTTAGAAAAGTAAGTTTTTTCTCATTAATATTATCTGCAATTGGATTATTATTATTTGTATTATCTGCAGATATTCACAGTTTTGCACTAGGTTGTGTTTCAAGACTAATGATAGGTATTGGAGCCTCATTTGCAACAGTCGGCTATATAAAAGCCGCTGCAGTATGGTTT…
FTT0054	FLH150486.01X	FtCD00020354	AY774767		ATPase	ATGAAACTTGAGAATATTTTTCTTCAAAAAATTCGTGAACTTGACTTAAAAGTTGATTCTTTACAACTTGAGGCTATTAGACGCTTGCAAGAAATAGTCGATCAACTTTATTCAAAAAAAAAATCTAAACTGAGATTGTTTAAAAAATCTTTTTATCCTGCTATCAAAGGATTATATATGTGGGGCGGTGTAGGTCGTGGTAAGACCTTTATAATGGATATCTTCTATAATAATCTCACAATAAAGAATAAAAAAAGACAGCATTTCTCGCATTTTATGAAAAATATTCATACGCAATTGAGAAAATATCAGGGTGAAAAAAACCCAATATCAAAAGTTGCGTTTGATATGGCAAAGCAAACACAAATTATATGTTTTGATGAGTTCTTCGTTGAAGAT…
FTT0055	FLH150390.01X	FtCD00020344	AY774766	rluC	ribosomal large subunit pseudouridine synthase C	ATGAATAAGGTTGAGCTTTTTGAGGTTGCAGAGGATGTAATAGATCAACGTATAGATAATTTTCTTTTAAGTAGATTTTCTCGATTACCAAAATCTTTAATTTATCGCTGGATTCGCAAAGGCGAATTACGTGTAAATAAAAAAAGAGTAAAACAGACATCACGTGTAAGTGCGGGAGATATTGTTAGAGTGCCTCCATTTAGTTTAGAAGAAGATTCTAAACCTATAAAAATTTCACAATCACACTTGGACTTTCTAGAGCAGCGTATCCTATATGAGAATGATGATTATATAATCGTTGATAAACCATCAGGTATGGCAGTGCATGGTGGTTCTGGAGTTAACTCAGGATTAGTTGAGCGTCTAAGGCAGTTGCGTCCAAAAGTTAGACGTTTAGAT…
FTT0056c	FLH150558.01X	FtCD00020369	AY774813		major facilitator superfamily (MFS) transport protein	ATGGATCAAAGGATATACAATATACGTGGCTACGCATGGATAATAATCATACTTAGTTCATTTCTACTATTTGACAAGTATGTAATGCAAGTATTTCCAAGTCTAATTACTGATGATATGATGTCTAATTTTGGTACCAATGCTACACAAACTGGAGCTTTAGGTTCAGCATTTTTCTGGTCCATTATTATCTGTCAACTTTTTTTAGCTGGGCCTATCATTGATAAATTTGGTTTTAGACTAATAAGCCCGATTTCAATCATAATTTCAGCAACAGGTGTTATATTATTCGTTGTTGCAGCAAACTTAGGTAGTCTTAGTATGGCATACATTGCAAGGATAACTACTGGTTTAGGTGTATCATTTGCTACGATATCTTATCTTAAAGCTGTATCGGTA…
FTT0057	FLH204842.01X	FtCD00022998	DQ681402		hypothetical membrane protein	ATGCTAATATGGGCTTTTTTGGTATTATGTGAGAGTGTTTTTATGAATGAGATTCATGTAATGTTAACAAATATTAAAATTGATACCAAAAAATTTATCTTACTGCAATTGATCTTAGTATTAGTTGGTTACTTTGTTATTTTAGTATTTTATAATTATGATTATGCTAATTCATTTTTAATAGGTTCATTAACAATGTTTTTAGCTAATTTTGTGTTTTTTTTCAGATTGTTTATAAATAAGCAGTTCAGTCCAGGGATTGAAATAGCAATATTTTATCTCAGCGAGCTTTTGAAACTAAGCATTGTAGCACTGCTGACAATATTGTTAGCAATTTATGTAAAACCGAAATTATTTTCTTACATTTTTGGTTTAGTTTTGTTACAATTAGCAGTGTGT…
FTT0058	FLH150311.01X	FtCD00020336	AY774776	atpB	ATP synthase A chain	ATGGCAAATACAGAAGCAGGCTCTCAAGTAGCTACTGAATATGTGCAGCACCACTTGCATCACTGGCAAGTAAGTTTAGGTCAAGGTTCTTTTTGGCAGCTTAATGTTGATTCATTATTGGTGAGTGGCATATTAGGGGTTGTATTTATATTGGCTATGTTTTTGGCAGCGAGAAAAGCTAACTCAGGAGTTCCAGGCAAGTTTCAGAATATGATTGAGGCTGTTTGGGAATGGATGGATGGCATGGTTGCTAATAATTACCATCATAAAAGAGATTTTGTTACACCACTAGCACTTACTATATTTGTTTGGGTAGTGTTGATGAATTTTATGGATTTGCTCCCAGTTGATCTTTTCGGTTGGATAATTAGCTTCTTTACTGCTAGTCATGAAGCTTAT…
FTT0059	FLH204824.01X	FtCD00022984	DQ681403	atpE	ATP synthase C chain	ATGGATATGTCTTTACAAGTTTTAGGGAACTTAAATGGTTTGACAGCAGTTGCAGTAGCTTTGCTTATATCTTTACCAGCTTTAGGAACAGCAATAGGTTTTGGTGTTTTAGGTGGTAAATACCTTGAAGGCGTTGCGCGTCAGCCTGAGTTAGGTGGAATGTTACTTGGTCGTATGTTTATCGTTGCGGCTTTCGTTGATGCTTTCGCTGCTATCTCAATAGCAATTGGTTTCTTAGTTCTTTATGCAAACCCTTTAGCAATTCCAGGCTTAGCTGAAGCAGCTCAGAAAGTAATCGGCGCATAG
FTT0060	FLH150490.01X	FtCD00020355	AY774768	atpF	ATP synthase B chain	ATGGATATTAATATTACTCTAATAGGGCAAATGATAACGTTTGCAATCTTTGTTGGATTTACAATGAAGTTTGTATGGCCTCCGCTACGTAAAGCTTTAGAAGAGCGTAGAGAAAAGATTGCTGAAGGTCTAGCATCTGCTGATAGAGCATCTAGAGAACTAGAGGTTGCTAAGAGACAATCTGCAGAGATTTTGCGTGAGGCTAAGGCTAAGGCGACCGAAATAGTTGAAAATGCTTATGTAAGAGCTCATAAGGTTGATGAGCAAGCAAAAGAGGAAGCTATTGCTGCTGCTGATAAGATTAAAAGCATGGCCATTGCTGAAATAGAGCAAGAAAAGGTTAAAGCGAAAGAGCAACTTAAGCAAGAGCTTGTTAATTTAGCTATGGCGGCAGCTAGT…
FTT0061	FLH150554.01X	FtCD00020368	AY774809	atpH	ATP synthase delta chain	ATGACTGATATAAGTGTGATTGCGAAGCCGTATGCTAAAGCAGCATTTGAGTTTGCAAATGAACATAACCTACTACAACAATGGTCTAAATTGCTTCAAACATTTTCTGAGTTGATCAAAGATAAATCGGTAGCTGCAATTGTATCTAGTCCTACTATATCTCAAATTGAGGTTGTGGATGCTCTAAAAAAACAGTTAGACGAAAACTTTTTTAATTTTCTTGCTTTGATAGCTGAAAATAAAAAAATGTTGATAATGCCAGAAATAGCAGATCAGTTCGAGTCTATAAAAAATATCCATAACAACGTTAGAGTTGCTGATGTTACTCTAGCTTACGCTACAGATAAAAATATCTTAGATAGTCTGAAAACTAGTTTGGAGAAAAAGTTTGGCTGTACA…
FTT0062	FLH152918.01X	FtCD00020584	DQ681404	atpA	ATP synthase alpha chain	ATGCAATTAAGTCCATCAGAAATAAGTGGTTTAATAAAACAAAGAATCGAGAAGTTTGACAATTCAGTTGAACTAAAATCAGAAGGTACAATCGTCAGTGTTGCTGATGGTATCGTTACTATTTATGGATTAAATGATGTTGCTGCTGGTGAAATGATTAAATTACCAGGCGATGTTTATGGTCTAGCTCTGAACTTAAATACAGATTCGGTTGGTGCTGTAGTTTTAGGGGATTATGAGCATATTAAAGAAGGCGATAAAGCATACTGTACTGGTAGAATACTAGAAGTCCCAGTTGGAGAGGCTCTCTTAGGCAGAGTTGTTGATGCTTTAGGTAATCCTATCGATGGTAAGGGTGAAGTGGCAACTGATTTAACTTCACCTATCGAAAAAATTGCT…
FTT0063	FLH152721.01X	FtCD00020558	AY774538	atpG	ATP synthase gamma chain	ATGTCTAACGCTAGAGAAATACGTTCCAAAGTACAGAGTGTTAAAAACACGCAAAAAATCACAGGTGCAATGGAATTAGTTGCTGCTAGTAAAATGAGAGGCGCGATTGTTAAGATGAATAATGTGCGTCCATATGTTGAAAGCGCAAATACTATTATCAAAAATGTCACAGCTGCAAGTATTGATTACCCTAATCCTTATTTATTCGACAGAGATGTAAAAAGAGTTGGCTATATAGTCATATCTACGGATAGAGGCCTTTGTGGTGGTCTTAATATTAATCTATTTAAACATGTTCTAAAAGAAATCAAGAACAATATTGAAGATAGAGTTGGGGTTGATGTATGTGTGATTGGCTCAAAAGCTGAAAATTTCTTTGCAAAACTAAAAGATGTTAAT…
FTT0064	FLH152873.01X	FtCD00020578	AY774529	atpD	ATP synthase beta chain	ATGTGTACAGGTAAAATTATTCAAGTAATTGGTGCTGTTATTGATGTAGAGTTTGCTCGAGATAACACGCCTAAAGTATATGATGCTTTAAATGTAGTAGAAGCTGGTTTAGTATTAGAAGTTCAGCAACAAATTGGTGATGGCGTAGTTCGTACAATTGCTATGGGATCTAGTGATGGTCTTAGACGTGGTATGGAAGTTAAGAACACAAATGCGCCTATTTCTGTTCCAGTTGGACATGGCACACTTGGACGTATCATGAATGTTTTAGGTGAACCAATTGATGAAGCTGGTCCAATTGAATATACTGAGAAAAGATCTATCCATCAAGCTCCTCCTGCATATGATGAGTTAGCATTAAGTACAGAAATATTAGAAACAGGTATCAAAGTAGTTGAC…
FTT0065	FLH152793.01X	FtCD00020569	AY774532	atpC	ATP synthase epsilon chain	ATGACAAAAAAATATCTAAAGGTTGATGTCGTTAGTCCTCTAGGTTCAGTTTTCAAGGGTGAAGCTGATATGGTGAGTCTGCGCGGCTCTGCTGGTGAGATGGGCATAGCATACGGTCATACTGAGCTATTATCTACTTTACCGGCTGGTGTAGTAAATGTCAGAAAAGATCAGCATACTGATGTGCTATATGTTTCAGGCGGTATAGTAGAGGTTACTCCAACTCGTGTAACTATTATGGTTGATGATATGGAGAGAGCTGAAAACCTTAATCAAGCTGAAGCAGAGAAAGCAAGAGCAAGAGCAAAAGAAGTTCTAAAAAATCCAGATGCTTCAAAATTAGATATTGAAGCGGCAAATAAAAGACTAAAAGAAGCTGATGCTCGTCTTAAAGCTCTT…
FTT0066	FLH230031.01X	FtCD00039275	DQ681405		hypothetical protein	ATGAGAAAACTTTTTATAAATCTTATATTGCTCACTTTAATATTTCCGTTAATTTTGCAGGCTGAGCCACTATCTGATTCAGATTCTAGCAGTTCTAAGTCACTACTACCGAATAGAACAATTGCAGGATTCCTTGATATTCGTACTCCAGGTTCAACAACAAGGGTTGATATGCAAAAGGTTAAAAAAGACGGCTACAATGTGATGATAGTTGCCTATGGAGAGGTATATGATGATAATATAGGGTTTTATACTAATTCTGTAACTTCTACACAGACTATAATAGACAAAATTCGTGACGCTAAGAAAGCTGGTATGAAAGTACTATTAGCTGTTGGTGGAAGTCCTAATACTTTTCATCCTGGGGTTAAGCAAGGTGCTCCAGATCCGAAAATATTT…
FTT0067c	FLH152678.01X	FtCD00020551	DQ681406		Glutaredoxin-related protein	ATGTACACTCCAGAAGAACAAAAAGTAGTTGAACGAATTGAAAAGCAATTAAAAGAAAATGATATTATTTTATACATGAAAGGTTCACCAAATCTTCCACAGTGCGGTTTTTCTGCGCATGCAGCAACGGCAATTAGATCATGTGGTAAGCCATTTGCTTTTGTAAATATTCTTGAGAACCCTGATATAAGAGCTATCTTACCAAAATATGCTGACTGGCCAACATTCCCTCAACTTTGGGTAAAAGGCGAACTAATAGGCGGCTGCGATATAATTATGGAAATGAATGAATCTGGCGAACTAAAAAAATTAATTGACTCTGTAAAATAG
FTT0068	FLH152922.01X	FtCD00020585	AY774554	sodB	superoxide dismutase [Fe]	ATGAAATTTGAATTACCAAAACTACCTTACGCTGTTGATGCATTAGAGTCAACAATATCAAAAGAAACAATAGAGTATCACTATGGTAAACATCATCAAACATATGTAACTAATCTAAATAATTTAGTTGAGGGTACAGAGCACGATGGCAGAAACCTAGAAGAAATCGTAAAAACTTCTAATGGCGGAATATTTAATAACGCTGCTCAAGTTTTTAATCATACTTTTTACTGGAATTGTTTAACTCCAAACAAAACAGAAGCTTCAAGTCAGTTAAAAGCAGCATTGATCGAGACATTTGGTTCTGTAGAAAATTTTAAAGAACAATTCTCTAAGGCAGCTATTGCAACATTTGGTTCTGGTTGGGCTTGGTTAGTAAAAAATACTGAAGGTAAACTT…
FTT0069c	FLH152634.01X	FtCD00020545	DQ681407		hypothetical protein	ATGCCAGAAAATAAAAGCGATAGCATAAATACTATCCATGGTAATAACAGAATTATCAATAAAATATTTCTAAATATAGCTGATAGTCGTAAACCTGGAAATAACACAGCTATCAAGATCACAACCACTATTGATAAAACCCCTATTACAAAAGAGAATAAGGCAATCTTATTTTTTGCCACTTAG
FTT0070c	FLH204859.01X	FtCD00023013	DQ681408	ampG	major facilitator superfamily (MFS) tranport protein	ATGACTAGTTCTCCATCATTTATAGATAAACTCAAAGCCCCTTTCAAAGAAGCTAAAATGTTTACTATGTTAATATTAGGCTATGCATCAGGATTTCCTCTTATGCTTACAGCCTCATCACTATTCTTATGGTATAAAGATAACGGCATAGAAACCAAAGATATTGGTTTTTTGACCCTTATAGCAATCCCATACACTTTTAAGTATTTATGGGCTCCTTTCTTAGATAAGATAAAAATTCCCATATTAGGGCGCAGAAAAGGCTGGATACTAATAACTCAAGTATCTTTAGTCATTCTAATTGCCATTATGAGTCGATTCTCACCAGCGAACTCACCACTTATAATTGCTTTTATTGGCTTTCTAATCTGTTTTATATCAGCAACGCAAGATATTGCT…
FTT0071c	FLH204863.01X	FtCD00023017	DQ681409	gltA	citrate synthase	ATGGAGGTCATGTTAATGAGTAAATACGCAACTCTTAAGTATGCAGATAAAAATATTGAAATAGAATTACCAGTATATTCTCCTAGCTTGGGTAATGACTGCATAGATGTTTCATCATTAGTAAAACACGGAATTTTTACTTATGATCCTGGATTCATGTCTACAGCTGCATGCGAATCTAAAATTACATATATCGATGGTGGTAAAGGTGTACTCTTACATAGAGGCTACCCAATCGAAGAATGGACTCAAAAATCAAACTACAGAACTCTTTGCTATGCATTGATTTATGGCGAACTCCCAACAGATGAACAGGTTAAAAGCTTTAGACAAGAAATTATCAATAAAATGCCAGTATGCGAGCATGTCAAAGCTGCAATAGCTGCAATGCCTCAACAT…
FTT0072	FLH204850.01X	FtCD00023005	DQ681410	sdhC	succinate dehydrogenase, cytochrome b556	ATGAGTAAAAATATATCATTAAGAGTTGTTTGTATAACATTGGTTACATCTGATCTACTTCTCTACAAAAATTGCTTCGGAGGAATGTCGAGCATGAAAAAAATTACTAATATTGACTTGATGTCAATAAAATCATATAACTTCCCAATCACAGCTATTAGCTCTATTATGCACCGCATATCAGGAGTTGTGTTGATAATTGCGATACCGCTTTGCGTGGTTGCGATGAACTATGCTCTTGCAGGGCCTGATGGTTACCAGCAAACAGTTACTGTATTAACTAAATCTTGGTTTAGTGTATTTTTTTGGCTTTTTTTATCATCGATAACATATCACGTTTACGCTGGTATTAGACATATGATTATGGATATGGGCTTTGGTGAGAGTATGAAAGTGGCA…
FTT0073	FLH204832.01X	FtCD00022990	DQ681411	sdhD	succinate dehydrogenase hydrophobic membrane anchor protein	ATGGGGGTGTTACTTATGGCTGTAATTTCATTAACTTCTTCTGGAATTAAAGACTTTTTCGTACAAAGAGTTACGGCTGTAATTATTGCTGTATATTTTGGTTATCTTATCCTAGAAGCTTTGTATTTGTCGCATATAGGAGCTCTTAACTATGATAGTTGGAGAGGTTTGTTTACCGATGGGATGTTTTTTAGAGTTGCTACGTTAATGGCGTACTTGGCGATGTTTTTTCATGCATGGGTAGGTATCTGGATTATATGTGGCGATTATATTAAATTTGCTTGGGCTTCTGCGCTTGTGATGCTGAGCTTTGTTTTGGTGTATATATTCTGCTTTTTTTGGTTATTTGCAGTTTTATTTTTCTATTAG
FTT0074	FLH152943.01X	FtCD00020588	DQ681412	sdhA	succinate dehydrogenase, catalytic and NAD/flavoprotein subunit	ATGAGTATAGCTACGCAAGAATTTGATGCTATTGTTATCGGTGCTGGTGGTGCGGGTTTAAGAGCTTCTTTCCAGCTGTCACAGTCGGGTTTTAAAACTGCTGTTGTTTCTAAAGTCTTTCCAACAAGATCACATACGGTTGCAGCTCAAGGTGGTATTGCAGCTGCTTTAGGTAATATTGAATTTGATGATGGCTTGCCATCAGATGATTGGAAGTGGCATATGTATGATACTGTTAAAGGTTCTGATTATATTGGTGATCAGGATGCTATTGAGTATATGTGTGAGCATGCGCCACAATCAATTATTGAGTTGGAGCATATGGGTATGCCTTTCTCAAGACTTAAAAATGGCAAGATATATCAACGAGCGTTTGGTGGGATGTCAAGGAACTATGAT…
FTT0075	FLH152643.01X	FtCD00020546	AY774549	sdhB	succinate dehydrogenase iron-sulfur protein	ATGGAAGTAAGATTTAAAATTTATAGATATAATCCAGAAGTTGATAAAAAACCTTATTACGATGAGTATACGGTTGAAGTAGAAAATGAAGGTGTTAAGGTTCTAACAGCTCTAGAATTAATTAAAGAGCAGGATCCTACCTTGGCTTTAAGAAGATCTTGTCGTGAAGGTGTTTGTGGTTCTGATGGTATGAATATCAACGGCAAGAATCGTTTGGCGTGTATCACTTCGGTTGGTGAGTTAAAGCAGCCTATTAAAGTTAATCCTTTACCAGGGTTGCCAGTTATTAGAGATTTAATCGTCGATATGAAACAGTTCTATAAGAATTATGAGAAAGTTAAACCATATCTTATCAATGATGATGAGCCGCCTGTTAAAGAGAGGTTACAATCACCAGAG…
FTT0077	FLH152910.01X	FtCD00020583	AY774547	sucB	dihydrolipoamide succinyltransferase component of 2-oxoglutarate dehydrogenase complex	ATGGTTGATTTAAAAGTACCTATGTTCCCAGAGTCTGTAGCAGATGGCACATTAGCTCAATGGAATAAAAACGAAGGTGACTTTGTAAATGAGGGCGATATCTTGGCAGAGATTGAGACTGATAAAGTTGTTCTAGAAGTACCTGCAACATCTAGTGGTGTTTTAAAAGGGATAAAAAAACATGCTGGTGATACAGTGCTTTCAGAAGAGTCATTAGCGATCATTGATACTGCTGTTTCTACATCTGAACCTAACCAACAAACTACTAATCAAGGAAATGCTTCAGAAGCAACTGCTACTGGGCAAGAAATTGATATTAAGGCGCCTGTATTTCCAGAGTCTGTAGCAGATGGCACGATCTCAGAGTGGCATAAGAAAGAGGGTGAGGCTGTTTCTGAG…
FTT0078	FLH152885.01X	FtCD00020579	DQ681413	apt	adenine phosphoribosyltransferase	ATGAACTTAGATTTTTTTAAGAGTAAGATTGCAGCTGTGCCTGATTTTCCAAAACCAGGAATTATGTTTCGCGACATTACTCCTTTGCTTGCAGATCCACAAGGACTCAGAAAAACTGCTGAGGCAATGGCACAAGAGTTAAAAAACAAAGGTATCCAACCAACTATTGTTGCTGGTACAGAAAGTAGAGGTTTTATCTTTGGTGTTGCTCTTGCTGAAGTATTAGGTCTGGGCTTTGTACCTGTCAGAAAGCCTGGCAAGCTACCAAGAGCAACTTATAGCGTTAAGTATGACCTAGAATATGGCAGTGATAGTCTTGAAATACATCAAGATGCCTTTAAAGTTACAGATGAGGTATTGGTGGTTGATGATTTATTGGCAACTGGTGGTACTGCAAAA…
FTT0079	FLH152841.01X	FtCD00020574	AY774344	mrsA	phosphoglucosamine mutase	ATGGCAAAGTATTTTGGAACTGATGGTATCCGTGGTGAAGTCGCTAACTCAACAATAACAGTAGAGTTTACGCAAAAATTAGGTAATGCTGTTGGTTCGTTAATAAACCAAAAGAATTATCCAAAATTTGTTATTGTTGGTCAAGATACACGTAGCTCAGGAGGGTTCTTAAAATTTGCTTTAGTTTCTGGCTTAAATGCTGCAGGAATTGATGTGCTAGATTTAGGAGTAGTTCCAACTCCTGTGGTGGCATTTATGACTGTTAAGCATCGAGCTGCGGCTGGATTTGTAATTACAGCATCACACAATAAATTTACTGATAATGGTATTAAATTATTTTCCTCTAATGGTTTTAAGCTAGATGATGCTTTAGAAGAAGAAGTTGAGGATATGATTGAT…
FTT0080	FLH152689.01X	FtCD00020554	AY774527	tpiA	triosephosphate isomerase	ATGCAAAAATTAATAATGGGTAACTGGAAAATGAATGGTAACTCTACAAGCATAAAAGAGCTCTGTAGTGGTATATCACAAGTGCAATATGATACTTCAAGAGTAGCTATTGCTGTTTTTCCATCAAGTGTTTATGTTAAAGAAGTAATCTCACAGCTGCCAGAGAAAGTAGGTGTTGGTCTACAAAATATTACTTTTTATGATGATGGTGCTTATACTGGTGAGATATCTGCTAGGATGTTGGAAGATATTGGTTGTGACTACTTACTAATTGGTCATTCTGAGAGAAGATCTCTATTTGCTGAGTCTGATGAAGATGTTTTTAAAAAGCTTAACAAGATTATAGATACTACTATAACGCCAGTAGTGTGTATTGGTGAATCACTAGATGATAGACAA…
FTT0081	FLH152710.01X	FtCD00020556	DQ681414	secG	preprotein translocase, subunit G, membrane protein	ATGTACGGAATAATTTTGACTATTGATATTATCGCAGCTATTGCGATTGTGGTACTAGTGTTGCTGCAGCAAGGTAAGGGCGCTAATATGGGCGTTTCTTTTGGAGCAGGAGCATCGAGTACTGTTTTTGGGAGTAAAGGAGCGGCATCATTCTTATTTAAGATGACAGTATTTTTTACCGCGGTATTTTTTGTGTCTTGTCTTACTTTAGGGTACTTAGGCAAAAGTAGTGCGATAACAGCGAATATAAGTACTGCTAATACTGATAGCTCAATTGCTAGTCAGTATGACCAGTACCAAAAAGAAGTTTCCCAAGCTGGTACAGCAGATACCTCTGAACAAGCTTCTAAATAG
FTT0083	FLH204854.01X	FtCD00023008	DQ681415		hypothetical membrane protein	ATGATTATGTTTTGGAGGTTATATATGAATAAGATACTCGGATTAATTCTCACAATTGTACTAACAGTAACCACATTATCATCTAATGGGTTTGCTGCTGATATACCAAATTCAACAGCATTACCATTAGCTAAAGTGGTTAATAATATTTATTCACAAGGATATAGTGGTATCAACAAAATTGAATTTGATGATGGCGTATATAAGGCAACAGTTATTAATAAAGATGGCCAAGAGCAATATCTGTATATTGATCCTACTACAGCTGCAGTGCCAGTACCAAAACAAGGTACTAAAGAGATTAATATGAGTCAGGCTATAGCAGCTGTTTCTCAAGATAGATGTAAGAATATTACAAGTGTTGAGCATTATAATGGAGCATATAAGGTTGAGTGTCTA…
FTT0084c	FLH204849.01X	FtCD00023004	DQ681416	hemN	Oxygen-independent coproporphyrinogen III oxidase	ATGTTTGAAATCAACAAACAAATTGGAATTTATATCCATTTTCCTTGGTGCGTGCGTAAATGCCCGTACTGTGACTTTAACTCTCATCCAATAAAAGATGATAGCTATCTTTCAGAACAATATTATCAAAAACTTATAGCCGATTTTGATACTCATCTTGATGATTTACAAGCTAGAGAAGTTATAAGTATTTTTATTGGTGGTGGCACTCCTTCTCTGTTTAAAGCTGAGTACCTTGATAAAGTTTTACAACATATTACTAAAAATACAAAAATTAGCATTAATTGTGAAATAACTTTAGAAATGAATCCAGGAACAGTAGAGAGAGGTTCAATACTAAGTTATCAAAATATTGGAATTAATAGGATATCGCTTGGGGTGCAAAGCTTTCAAGATGAT…
FTT0085c	FLH204834.01X	FtCD00022991	DQ681417		conserved hypothetical membrane protein	ATGTTAAAAAAACAACTTTCTTTATTTATTATTGTCGGCATATTAGCTTCTATAACTAACTTTATTATCGTATGGATACTTGTTGAACTAAATATTTTTAGACCTTTAGTCGCGAACTTTTTTGCTTTTTTAATTGCATTTAATGTTAGCTATTTTGGTCATCGATTTTTGACATTTTCGACAACTACTCAATCTCATAAAAAAGCTGCAACACAATTTTTTATAAACGTTATGATAGGCCTTGGGCTTAATGAATCTATTTATTACGTATTATTACATATTTTAAAAATACAATACCTACTAGCTTTATTCATAACTATGGGGCTAGTTGCGGTATATACTTTTGTTGTAAGTAAATTTTTAATCTTCAAGGCGTAG
FTT0086	FLH204827.01X	FtCD00022986	DQ681418		hypothetical protein	ATGGAAATAATTAAATATCAATTAGGAATAGTTGAAAACTTGCCATTATCGGCGCTATATATGATGTTTAATATCAAGAAAAACAGTGATGTTAGTTTTGGTTTAAAAATTTTACAAAGATTTGTTGATGGTAAAAGTGTAGTTGCAGGCTTTGGTAATAATCTTTTAAAAATGTTTAAAATACCTGAGAATGAAAGCTTTAAAAGAACTAAATTTAATAATCCAAGAATGTCTGATAATGATGGTTATGATTTAGTTCTTTGGTTAAGAGATGATGATAGGGGAGAGTTATTTCATAAGGCAATAGCTATTAAAAAGGCTCTAGAAGATTATTTTGACATTGAAAAAGTTATTTCAAGCTATACCTATCGTGGTAAGTATGATTTATCAGGTTTTGAG…
FTT0087	FLH153768.01X	FtCD00020682	DQ681419	acnA	aconitate hydratase	ATGTCTGATATTAAAAATATCACTAAGCTACAAATAGAGGATAAAGGAAAGAAATATTCTCTATATAGCTTAAAGAAACTTTCTCAAGAGCTTGGTAAAGATGTTACGCGTCTTCCTTATTCAATCAGAGTATTACTTGAAAACCAACTTAGAAATATAGATGGTTATAAAGTAAAAGAAGATGATATGCACAAGGTTTTAGATTGGGACGCTAAAGCTAGCTCAAGACCTGAGATCCCACATATGCCTGCTAGGGTTGTGATGCAAGATTTCACAGGTGTACCAGCAGTTGTGGATTTAGCTGCGATGAGAAAGGCGATCAAAGATGCTGGGGGTGACGCAGACAAAATTAACCCTCTTGTAGATACAGCAATGGTAATTGACCACTCAGTACAGGTT…
FTT0088	FLH151572.01X	FtCD00020478	DQ681420	pilT	Type IV pili nucleotide-binding protein	ATGATAAGAAAATTACTAACTCTTTGTGTGCAAAAAAAAGCCTCTGATCTACATTTATCCTCTGGTTGTAAGGCTAAATATAGAATAGATGGAGATTTGATTGATATTGAATCTTCACCTGTATTAAATGATAAGATGATTTCTCAGATGCTTTTAGAAATCATGACAGATGATCAAAAAGATGAGCTGATAGAAACCTACGAATGTGATTTTTCTATAGATGATAGAGATAATGATGCGAGATTTAGGGTAAATGCTTTTTTCCATAACCGTGGTTATGGCGCGGTATTTCGTCGTTTAGAGAATACTATTCCAACGTTAGATCAATTTGGAGCACCAAGAATTCTTAAAGAAGTTCAAGCTAAAAAAGGTGGCTTAATTCTAGTAACAGGACCCACA…
FTT0090c	FLH204844.01X	FtCD00039259	DQ681421		conserved hypothetical membrane protein	ATGAAGAATCAAAAGAGTATAGATGTTTATCTAGCATATTCTGGTTTAATACCTTTCTTATTCTTTACAATCTGCTTACTATTTAATTATAAACACACTTTAATATTTGGAAATACTATACAAGCATTATCTATATATGGCTTGATAATAGCAAGCTTTTTAGCAGGCACTCACTGGGGAAGACAAATCAACATTGAGTCTCCAATAGTAAAATTACTCTTACAAATCTCAAGCAATATTAATGTAATAACCATCTGGTTTGCATATCTCAACCTAAATTCAAAATACTTTATTTTACTATTAATAATAGAGTTTTTAGTATTACTTAAAATTGATTATTACATTTATAAACTAAAAATAACTTCGAGTAGATATTTTTTGTATATTAGATTACCTATA…
FTT0091c	FLH153134.01X	FtCD00020613	AY774351	appB	cytochrome oxidase bd-II, subunit II	ATGGATTTAGGATTAATTTGGCTAGCAATTATTGCTTTTGCACTACTGCTATACATGATCTTGGATGGTTTTGCACTAGGGATGGGAATATTATTTCCACTTTTAGATGATCACCAAAAGGATATAGCAACAAGTATTTTGTTACCAACATGGGATGGTAACCAAACATGGCTTGTTTTTGCACTAGCATGTTTCTATGGAATGTTTCCAATAGCTTTCGCGTATATATTTCCTAAAATATATTTGTCAGCAATATTATTAGTAGTAATGATATTGCTAAGAGGAATATGTTTTGAATTTCGATTAAAATCTTCCCAAAAAGGTATAAAAAATTGGGATAAATTATTCTTTATATCATCTTTTGTAGCAACATTTCTACAGGGCTATATAGTTGGCGAA…
FTT0093	FLH153086.01X	FtCD00020604	AY774573		hypothetical protein	ATGAGAATATTAGTTGCAGGAGGCTCAGGTTTTGTTGGTAGAGAGCTGTCTAAATATCTAAGTACCAGACATCACTTAACTCTTCTTACTAGAGTAGCAAACCAAAATTTAGGTGACTATAAAGAGCTCATAACCTGGCAGCAGTTGACGGAAGATAATATTGTTAATTATGATATTATAATAAATTTATGTGGCTATAATATCGGCCAAAAACGTTGGACTAAAGCGGTTAAAGATAGAATATTATCAAGTCGTATTGAGCCAACCAATAAGCTTATACGTCTAATAAGCAATAAAAATATTTGGCTAATAAATGCTAGTGCAATTGGCTATTATAATTTTTCTAAGCTAGCGCAAGATGAAGATAATCATGACAGAAGTTACGATAAGCTTACTTTT…
FTT0094c	FLH153283.01X	FtCD00020628	DQ681422	qseC	sensor histidine kinase	ATGTTTTTGAAAAACAAAAAAGAATGCTCGATACTAAGTTTTCTTGTCGTTTCTTTTGCAAGCTTTTTTGCAGTGTTTATGTTGGTTATATCAATTTTTAGTTTCTATCAAGTTAAGCATCAAAATGATTCGCTCCTTGACTATCAGCTAAGAACTGCTGCGGAAGTTATCGAAACTGTACTGAAAATTTATCCTTTAGAAGATGATGAAAATACTACTCATATGATAATGAATAGAATCTCGAATTCTTTTTTAAATATAAAAAACTACAATAAGAGTATCGGCTTTATTGTATACGATCGAAAGCACAAAAAGCTGTTATTAAAGACATCTAATTTACCAAACTTTCACAAAAACTATGATGGCATAACATCTACAACAGGATTTGAATGGGTATAC…
FTT0095	FLH204835.01X	FtCD00022992	DQ681423		hypothetical protein	ATGTTAAATAGTGTGAATAATATAACTCAACCATTCTATACAAAATACTATGAATGCGTAGCTTTGTATTTCTATACTCAAGAAAATCTAAAATTTGATGTGCTTATCACATGTCCTCATGCTGAGCTTGGTAAAAGTTTTGTCGAGTTTGATTTTCCTGCTATTAGTCAGCTTATTAAACTTAGTAAAGATGATTTTAACGATTTCCTAGCGATAGAATATGATTTTGGTACTCACTCACTTGGTCATGCGATAGCTCAAAAACTCTATGCAGAATATGGTTTATATACTTTAGTTGCTGAGCCGTCTTTCCCACGCTCAATATTAGATGCTGGAAGGCTATATCCTAATTGTCTAAGAAATATTGTCGATTATGATCAGCACCCACAATTAAAACAA…
FTT0096	FLH153173.01X	FtCD00020617	AY774569		hypothetical protein	ATGGATAACTTTATCTTTTTGGATAAGTTAATCGAGCATTATAGACTATCGACTATAGTTATGAATTATGCAGATCAGATTCAAGAGTTTAGTGATCCTGAATATACACATTTAGTTCCATTTACCGTAGCGACAGCTGTAGAATTACTTGGCATAAAATATAATAAAAACTATGGCTTGCCTGAAGCGTTATCGCAGTTTTTAAATGATAAGTCTTTCCTTAGACAGATGTTACATGCTAAGGGGATACTAGTCCTTAGTATTAATATAGTATCGACAATTAGTGATGATGATTATGTGAAAAAAGCTCTAGAAATTTATCGGGAATATGAAAATAACGGAATCTATGAGTGTGCTGTAATTATGCCAAGAGCATGTTCTGGTTATGGAATACATAGA…
FTT0097	FLH204866.01X	FtCD00023020	DQ681424		hypothetical protein	ATGGGTCTAAATTTACTCAAAAATATGGAAGAAAAAACGATATACAGAGGTATAAATGTAACGATTGTAACAAAACATTTAGTTCAAATAGAGAGACCTAGTAAGCTACTAGAGATATTATTTTATAAATATGTTTTTAAGCATCAAACCTATGCAGATTTAGCCCTTGAATATGGCAAAACTAAGAGATGGGCTTATGATCAAATCCATAGCTATGAAGTAGCTAAAAAAGAGCATAATCCTAGAGCTGTAACATTGCTGTGTGATACTACCTTTTATGGCAAGAGAAAAGACAAATTAGCTACAGTAGTTTTCTGTGATACTATAGAAAATGAAGTCTTACTTTGGAGGCATGTAGACTCAGAGAAGTCTAAATATTACAAAGAAATGTTACAACAA…
FTT0099	FLH204876.01X	FtCD00023028	DQ681425	isftu2	Transposase	ATGAATTATCATATAAAAGAAGTATTCTGGTCAATTATTTTATCATTCTTAAAATCACAAAAAGGTATACATACCAATGATGAAGCCAAATTAAGATTGTTTATTGAAGCTGTATTTTATGTGTTACGTACAGGCTGTCAATGGAGAATGTTACCATTTTATTATGGTAAATATAGATCAATACATAAGCGTTTTAAAGATTGGTGTGATAAAGATATATTTTCTAGATTATTTAAATCAGTACAAAACCCTGATTTACAAGAAGTCATGCTTGATTCAACAATAGCAAGAGCACATGCTTGTGCTACGGGATATGATAAAGATGATAACCAAGCAATTGGTAGATCAGTTGGTAGGATAACCACTAAAATCCATGCTATGACTGATGCTTTAGGTAAT…
FTT0101	FLH204841.01X	FtCD00022997	DQ681427		conserved membrane hypothetical protein	ATGTTGTTAAAAAATAATTATTTAGTAAGTATTATATTAGTAGTACTAATTATGATAGTTACAAAATCATTTGCTTGTGCTGCTACAGATTACAATAAAGTCGCTTTAATTAATGTATCAACACAATATTATCCGAATGACATAAAACAAGCAGAGAAAGCGCTTAAAGACACCGGATATAATACTACTTATAAATATTTAGACATATATCCTTCTGATTTTGGATATTCTAATCCAGATTCAATAAGAGCTAAAATATTATTAGATGCTCTTTTAGATAAAAATATAGATATTATTTGGTTCTTAAAAGGAGGAGGTGGAGCATTTAATTTATTACCTTATCTATATGATCATATAAATGAGCTTAAAAAAGCTAAACCTAAAATATTAGTTGGATTT…
FTT0103c	FLH150246.01X	FtCD00020331	AY774732		hypothetical protein	ATGGACAAGGATGTACTAGATATATATACAGACTATCTTATAAGCCAAACTAAGTATGCTACGGCTACAAAATTATCAGACATATTAGATCAAGAAGTATCACATGACAAAATAACAAGATTTTTAAGCAAGCCATATTTGACAAGCTTAGAATTTTGGAAATATATAAAGCCTTTAGTTAGAAAACATAATAGCGAATACGAAGTTCTTTGTTTGGATGATACAATTAGTGAAAAGCCAAGTACAGATGAAAATGATATAGTCTGTTGGCACCACTCTCATGCTAAAGGTGTTCATGTAAAGGGTATTAATATAGTCTCATGTATACTTAGTACATCAAATTTATCTATTCCTATAGACTATGAAATAGTGAAAAAGTATAAGAGATATTATGATGAA…
FTT0104c	FLH150210.01X	FtCD00020328	AY774712		major facilitator superfamily (MFS) transport protein	ATGGATAAATCACATTTACCAATCACAAAAGTCCTAGTTACATTGTCTTGGATAATATGCTTAATTGCAACGTTAAATTATAGTTATGATTTTTTTATTCGTGCCGCACCAAGTGTCATGGGCAATAATTTAATTATTGATTTTGGTATTAGTCACACAGAACTAGGTATGTTGTCATCAGCATACTTTGTATCATATACAATCATGCAAATACCTGCAGGAGTTATACTCGATAAATATAATCGTAAAGTAGTAATCAGTATTGCTACTGCCTTTTGTGTTTTAGGAAACTACTTGTTCTCAGCTACTAACTATTATGAAGTAGCATATATTGGTAGGATATTTATGGGTATTGTCACTGCATTTGGCTTTATAGGTGCAGCAAAAATGGCTGGGATG…
FTT0105c	FLH230050.01X	FtCD00039280	DQ681428		Transporter AcrB/AcrD/AcrF family	ATGCGTCTTATTGATCTTTTTATCAGAAGGCCAGTATTATCCCTTTCAATAAGCTTTATGATTATTGTCGTTGGGGTTGGTTCATTTTTTAAACTTCAGGTTAGACAGTATCCGTACATAGATAGCGCGACAATTACAGTCACAACATCATATCCAGGAGCAAATCCAGCCACTATTCAAGCATTTGTTACTAGACCTTTAGAAGCTGCAGTTGGCTCATCAAAAGGTATCGATTATATGACTTCTGAATCAGCACTAGGAACTAGTACAATCACTGTATATGTAAAGCTTGGATATAATACAAACGATGTACTCTCAGAAGTAGTACAAAATGTTAACTCTATACTTAATCAGTTACCACAAGATGCCTACTCTCCTGCTATCAAACTTAATCCTGCG…
FTT0106c	FLH150226.01X	FtCD00020329	AY774720		Efflux protein, RND family, MFP subunit	ATGGACGTTAAGAAGACTTTTTTAAACATTAAACAAAAAATAAACTCAAGCAAAAGAAACTATGCTATTTTTGTTATCGCAACTATAATTCTAGCCTGGCTTGTGCTTGGAAAACTTGGGATATCATTAGCAATTGTATATTTTATCTTCCAAATTAACTATATCAAGAATAAGCTCCATAAACTTAAAGATAAAAAAACTGCATCTATTGCTATTGTGGTTGCAACCCTAATCCTTTTTGGAGGGATTTTTAGTTTTGCTGAATTTATTCAAAGCATGATTAAAAAAGGCATGGCAGCATATGTACCCCAACCTGTTGCAGTAACATCATCTGTAGTTGAGAAAACTGATTGGAAACAAGTTATTAACACTATCGGTGAAGCTCAAGCAGTTCAATCT…
FTT0107c	FLH204856.01X	FtCD00023010	DQ681429	dsbB	disulfide bond formation protein	ATGAAAAAACTAAGCAATTGTATATTTATATTTAATACATTAGCTTGCTTTGTAGCTTTAGGAGTAGTCATTTTCACAATTAGTGTTTTAGATTGGAAACCATGTCCCATGTGTCTACTTCAACAATTATGTGTATTGTCTATTATGCTACTTAGTTTATTAGTATTGGCGACAAAAAAATTCAAAAGCTTTTCTACGCTTTTACAACTGATAACTATCATAGTCATTGCAACAGGCGCCTATATTGCCGCAGATCAAGTTTATTTGCAATATTTCTTGACAGATACCAGTAACAATAATGCTGCATGCGGTGCTATTAACAATAAGTTTTTACTTGATGCTACCAAATCAATCACCGGAACAATCAATAGTTGCACTGATATTTCTGAAAAAATATCT…
FTT0108c	FLH150108.01X	FtCD00020315	AY774705	cca	tRNA nucleotidyltransferase	ATGATATTTTACTTAGTTGGTGGCGCCGTTAGAGATATGTTGTTAGGCATAACACCTAAAGACAAGGATTGGGTAGTTGTTGGTGCAACTGAAGACGAGATGCTAGCAAATGGATTTATAAAAATAGCAGCCAACTTCCCAGTTTTTATCCACCCACAAACCAAACAAGAGTATGCTTTAGCAAGGTCAGAAAAGAAAACTGCCAGTGGCTATCATGGCTTTGAAGTTAATTTTTCAAAATATATAACTCTAGAAGACGATCTTAAACGTCGTGATCTCACAATTAACTCAATAGCAATCGATCAAAATAATAAAGTAATTGACCCTTTTAATGGCCAAGCCGATCTTCAAAATAGAATTTTACGCCATACTTCAATAGCCTTTATCGAAGACCCACTG…
FTT0109	FLH204891.01X	FtCD00023037	DQ681430	valA	Lipid A transport protein, ABC transporter,ATP-binding and membrane protein	ATGGCTAATATGATTGATAAAATAGATCTTAAGTCTCAGGGATCTAGTAATCTAAGTGGAGAAATGACAAACCATCAGAAAGTAGGCACTCTTTATAAAAGGTTGTTACTCCAAGTTAAGCATTTATGGCATTTTCTGCTTTTGGCTGCTATCGGAAGTATATTTTTCTCAGCGGCTGATGCCTCAATGATATATCTGATTAATCCGATTTTGAATTATGGTTTTGGTCCTGGTGGCGGGATTACTAAACAAAGTGCTACTATACTAATGCTTATGGGTGTTGGCATGGTTGGTTTACTAGCGTTAAGATCAGTAGGTTCATTTGTGTCACAGTACTTTATAGGTTCTTTAGGTCAAAAAGTTGTTTATAAATTTAGGAAAGATATTTATAAAAGGTTA…
FTT0110	FLH150076.01X	FtCD00020311	AY774742	valB	Tetraacyldisaccharide 4'-kinase	ATGCTAGATAGGATTTGGTACAGATCAAAACCAAACTTGCTTAGTCGGGTGCTACAACCAATATCTTTGGTTTTTATAGATATTGCAAATAAACGTAAAATAAAACAGCAACTCAAGCAATATAAATCAAAAATTCCTATAATAGTTGTTGGCAATATCTCTGTTGGCGGTACTGGCAAAACTCCAGTTGTTAGAATGTTAGCTCAGCAATATTTAGCACAAGATAAAAAACCAGCTATAATTAGTCGTGGATATGGTGCAAAGGCTGATAATTATCCTTTTGAAGTAACAAGTGGTACTCTAGCAACTCAATGTGGCGATGAGCCTGCGATGTTATTTGATGCTTTGCAAGCACAGGTTCCTATTGTTATTGCTCCAGAGAGAGTTCAAGCTGTTAAA…
FTT0111	FLH153639.01X	FtCD00020667	DQ681431	polA	DNA polymerase I	ATGAAAAAAATTGTTTTAGTGGATGGCTCTTCATATCTTTTTAGGGCTTATCATGCTTTACCACATCTTACTAATAGCCAAGGTGAGCCTACGGGAGCAATCATTGGTGTTATCAATATGCTTAAAAAATTACCCATAATGTATGATACTGAGTATGTTGCGGTTGTTTTTGATGCAAAGGGTAAGAACTTTCGTCATCAGTTATATCCACAATATAAAGCACATCGTAAAGATATCGATGATGAGCTAAGAGTCCAAATTCAACCATTACATCAGATTATTGAGAAGATGGGATTTGCTGTAATCATTGAAGATGGTGTCGAGGCTGATGATGTAATAGGTACCTTAGCGCAAAAACTTCAAAAACAAGATTACCAAATTATTATTTCTACTGGCGAC…
FTT0112	FLH150013.01X	FtCD00020305	DQ681432		transcriptional regulator	ATGTTATTAGTAATGGATATGGGCAATTCCCATATACACATTGGTGTGTTTGATGGTGATAGAATAGTTTCTCAAATTAGATATGCAACATCATCTGTAGACTCGACTTCTGATCAGATGGGTGTATTCCTTCGACAAGCATTAAGGGAAAACTCGGTTGATTTAGGTAAAATTGATGGCTGTGGTATATCTTCGGTAGTACCACACTTAAATTATTCTCTTGGTTCAGCTGTTATCAAATATTTCAATATTAAGCCATTTTTTATAAGTATGGATACTACAGATTTGGATATGTCAGCAGTTGAAGCACATCAGGTTGGCGCTGATAGAATAGCAAGTTGTATTAGTGCAATAGCTGATCATCCTAATAAGGATTTGTTGATAATAGATTTAGGTACA…
FTT0113	FLH150188.01X	FtCD00020324	AY774752	deoB	Phosphopentomutase	GTGTTAAAAGATAAAAAAGTTGCTATCTTACTCTTTGATTCATTTGGTATTGGTCAAGCTCCTGATGCAGCCGATTTTGGCGATGAAGGTGCTGATACTCTAGGTCACATTGTTGATTATTTTACTAACAATGGCATGAGCATTTCGCTGCCAAATTTATCAAAGAAGGGCCTTAAGAAAGCTGCGGAATATAATAGATGTAAAGAATTTAGTCAAGATATTGCACAATCTGAGCAGGTTGAAAATGCAAAATATGGTTATTGCGCTGAAGTAAGTAAAGGTAAGGATACTCCAAGTGGTCATTGGGAACTTGCTGGAGTGCCAGTTATGTTTGATTGGTATTACTTTACAAAGAAACAACACCAAAGCTGTTTTGATAAAGAATTTATTGATAAGTGG…
FTT0114	FLH204878.01X	FtCD00023030	DQ681433	deoC	Deoxyribose-phosphate aldolase	ATGGTAAATCAATCTTTGGGGCTAGCCATGATAACTAAGCAAGAGATAGTATCCTTGATAGATTTAACACAACTTGGAGATAGTGATACACAAGTAGATATCGTTAATCTTTGTTCTAAAGCGAGAAATTCTCTCGGTGAAGTTGCAGCACTTTGTGTTTATAAGCAATTTATTCCTGTAGTAAAAAAACAGTTGGGGAATAACTTTAAAGTTGCGACTGTGGTTAATTTCCCTAATGGAGATAATACTATTGAGGATGTGATTTCAGAAGTTAAACAAGCTTTGTCTTTGGGTGCTGATGAGATAGATTTAGTTATAGACTATAAAGAGTATCTTGATCAGGGTTTTTCTGAGAAATCTTGTCAAATGATGGTTGAGGTTAAAAAACTTTGTAAAGAT…
FTT0115	FLH150148.01X	FtCD00020321	DQ681434	nupC1	nucleoside permease NUP family protein	GTGATTATTAAATCGCTATATTTTATATTAGGTCTTATAGTCATTTATTTTTTAGCTTATATTTGGAGTAATAATCGTAGAAATATCAGATATAAGAATCTTATAATTATTTTAATAGTTCAACTTATCTTAGCTAAATTTATGCTAAGTACTTCAATAGGTATAAATATTATCAACTACGTTAATAAATGTTTTGAAGTATTGCTTGATAGTACACATATCGGTGTTGAATTTGTTTTTGGTAATTTAGCAAACATAAAAGAGTTTATATTCTTTTTTAATGCTGCTATGCCTATTGTAGTAATGTCGGCAGTGATAGGGATTTTGCAATATTTTAGGATATTACAGTTTCTAGTATTTGCTATAGGTAGTATCTTATCTAAAGTAACAGGTATGGGT…
FTT0116	FLH204857.01X	FtCD00023011	DQ681435	nupC	nucleoside permease NUP family protein	ATGTTTGTAAAGATTTTATATTTGTTGTTAGGTTTAGTAACGGTTTTTATATTAGCTTTTATTTGGAGTAGTGATAGAAAAAAAATCAAATATAAGCATTTATTTATTATTTTATTTTTTCAGTTATTAGTTTGTTTTTTTATATTGCAATCTAGTGAAGGGATAAAGCTTGTAGCTATTATATCTACGGGTTTTGATAAGATATTACAACATGCTCATGAAGGTACGGCATTCGTTTTTGGTAGCCTTGCTGATACTAGTAAAAATGGCTTTGTTTTCTTTTTTAATGTTGGAATGCCAATAGTGCTTATATCTGGAATAATAGGCGTGCTTCAATATTTTAGAATACTTCCTCTTGTTATTAGATGGGTTGGTTTTATCTTAACTAAAATCACAGGG…
FTT0117	FLH149922.01X	FtCD00020298	DQ681436	tmk	thymidylate kinase	ATGCAAAGTAAATTTATTGTAATAGAAGGTCTTGATGGTGCTGGTAAAAGTACAGCTATTAGCTTTGTTAGGAAATATTTAGAAAAAAATAATCTAGCAGCAATTTATACTCGTGAACCAGGCGGAACTAAAATAGCTGAAGAATTAAGAAACTTAGTTCTACATAATAAGTATGATGAAGAAATCCATTCAGATAGTGAGCTATTGATGATTTATGCTGGAAGAGTACAGCATTATAGAAACCTTATCGCACCAGCTTTAGAAAAGGGTATTAATGTGGTTTCAGATAGATTTTACTGGTCAAGCATGGCTTATCAAGGTGGTGGTCGTGGGGTTGAGCTAAGCAAAATCAGAGCGTTAAATGATAATTTTCTTAATGGTTGTGAGCCAGATTTAGTA…
FTT0118	FLH150274.01X	FtCD00020334	DQ681437	prfC	peptide chain release factor 3	ATGAGTGAATATCTACAACAAATCGCTAAGCGTAGGACTTTTGCAATTATTTCTCACCCAGATGCTGGTAAGACAACAATTACAGAAAAAATGTTACTTTTTGGTAATGCTATCAAGACAGCAGGAACTGTTAAAGCTAAAAAAAGTGGTATACATGCTACATCGGATTGGATGGAGATGGAGAAACAAAGAGGAATTTCAATCACAACCTCGGTAATGCAATTTCCCTATAATGGACGTATTATAAATCTACTTGATACTCCAGGACATGAAGATTTCTCTGAGGATACTTATAGAACACTTACTGCGGTAGATTCAGCACTAATGGTTGTTGATGCAGTTAAAGGTGTCGAGGATAGGACTATTAAGCTGATGAATGTTTGTCGCTTAAGAGATACG…
FTT0119	FLH150574.01X	FtCD00020372	AY774763		hypothetical membrane protein	ATGTTAAATAGTATCAGTAGGGTTCTTGTAGCTGGATTTGCATTAGCGAAGGTAAGTCCAGTTTTCTCAATGGAAATATATACCGTTAAATCAAATGATTATCTATATAAAATAGCAAAAAATCACGCAGTAACAGGTGTAAGCATATCTGAGTTAACAGATGCTATTAAGGGTATCAATAAATCTGAGATACCTGGAATTATTGATAATAGAATAAGAATTGGTGATAAACTTGCTATCCCAACTACTAAGGCTGAGGTTGAGGATGGCTTAACACTGATGAGAAATCAGATAATTCAAAGCTCATACCAACAGCCTAGCAGTGATACAACTTCGCAACAACCTAGTACACCTGCTGCTAATCTTGGTGATAATACAGCAGCTGCTAATGATGCTGAT…
FTT0120	FLH204843.01X	FtCD00022999	DQ681438	ftsY	signal recognition particle receptor FtsY	ATGATTATTTACTTAACTAAATTTTTAGAGAGAAAGATGTTTTTCAAGAAAAAAAAGAATACAGAAATTGAATCACCTATAGAAAGAGTACAAGAGCAGGATAATAAAAAAGGATTATTTTCTCGACTCCAAGCAGGTTTATCAAAAACAGCAAATAAGTTCGGTAGTGGTTTAAGTACCATACTTATGGGTCAAAAAGTTGTTGATGAAGAGCTTTTGGAAGACATTGAGATGCAACTACTAACAGCAGATGTTGGTGTTGAAGCGACAGATGAGATAGTTACTTATTTGCGTGACAAAGTTGCTAGAAATGAGTTGCAAACAGCTGATAAGCTTAATCAAATAATCCAACAAAAACTTACAGAAATAATTTTACCTTGTGAAAAGCCATTAGAAGTA…
FTT0121	FLH230055.01X	FtCD00039282	DQ681439	uvrD	DNA helicase II	ATGTCTAATTATGACTTTACCTTAGGATTAAATCCAGAGCAGCAAAAAGCTACATTACTAGAGGATCGTAATGCTTTGATTCTCGCTGGTGCTGGCAGTGGTAAAACAAAAGTTCTAACATCACGTATAGCTTATCTTTGTCGTGATAAAGGAGTATCTATAGAAAATATCCTTGCCGTAACATTCACTAATAAAGCAGCAAAAGAGATTCAGCAGCGTGTAGAAAAGATGCTTGGGATTTCTACATTTGGAATGTGGATAGGTACTTTTCATGGTATTGCACATAGACTATTGCGTAAGCATGCTCATGAACTTGGCTTAGATAAGAACTTTAGGATACTTGATCAAGATGAGCAGGCACAACTGGTTAAAAAGGTAATCAATAATCTAGATCTTGAT…
FTT0125	FLH150414.01X	FtCD00020347	AY774782	oppD	oligopeptide transporter, subunit D, ABC transporter, ATP-binding protein	ATGAAAGATTTAGCACTTCAAATAAAAGATTTAAACGTGGGTTTCAAGGCAGATGATGGCATGTTTTCTGCGGTTAGAGATATCAGCTTTGATCTTAAAAAAGGTCACACTCTTGGTATTTTCGGAGAATCTGGCTCTGGTAAGAGTCAAACGGTATTGTCACTTATGGGGTTGCTTGCAGGTAATGCAGTTGTATCTGGGCAAGCTTTGTTTCATGATCAAAATCTTATAAATATGCCAACCAAGAATTTAAATAAAATTCGCGGTGATAAAATAGCAATGATCTTTCAGGATCCAATGACTTCTTTAAATCCGTATTTAACTATTCACAAGCAGCTCTTAGAGCCTTTAACAATACATAAGGGTATGTCTCACAAAGATGCGACTAAAAAAGTTTTA…
FTT0126	FLH204837.01X	FtCD00022994	DQ681440	oppF	oligopeptide transporter, subunit F, ABC transporter, ATP-binding protein	ATGAATGTTCTAGAAGTCAAAAATCTAACTGTAGAATTTCCTATAAAAAAAACAATCACTGGCAAAATCACCCAAAAAGTTACAGCTGTAAAGGATGTCAGTTTCGATGTCAAAGAAGGCGAAATAATTGGTATAGTAGGTGAATCCGGCTGTGGTAAGTCATCACTTCTAAGAGCGTTGATTGGGCTTAATGAGATTACTACAGGTGAGGTTGTTTGGAAAGGCGAACACCACTTACACAAGTATAAATCTCATAAACAGTGGTTAAGTGTAAGAAGGGATATTCAGATGATTTTTCAAGATCCTTTTGCTTGTCTTAATCCAAGAATGGTAGTTAGAAATATTATTGCTGAGCCTCTGATTAATTTTAATAAGAATCTGAGTAAAAAAGAAGTTGAT…
FTT0127c	FLH150510.01X	FtCD00020358	AY774784		major facilitator superfamily (MFS) transport protein	ATGCAAAAATTTAAACTTTCCTTAATTCTGGTTGTTGGTATTAGTTTTTATTGTTATGAATTTTTCTTGAGAATACTTACAGGTGCGTATCAAGAACAAATAGTTGAACACTTCAATATCTCAACTCATATTGGATTTTCTTTCTTAGTGTCTAGTTATAATATTACATATCTACTGATGCAAATACCCGCAGGAATATTACTTGATAGGTATGGTAGTAAAAAAGTGCTAATTGGTGCTACGATTCTTTGCGGAATTGGTAATATTATTTTTGTCTCAGGGGAATATGAACTAGCTCTATTTGGTAGACTATTAGTAGGTCTAGGTTCATCTTTTGCTTTTATTGGCGTACTAAAACTAACGCTAGAAAACTTTGAGTCAAAGTATTTCCCGATTATC…
FTT0128	FLH150578.01X	FtCD00020373	AY774764		hypothetical protein	TTGAAGAAAGTAATTACTTTTTCAGCGTTATTTCTTTGCTCTATTTTTGGTTATAGTGATAATAACCTAAATCAACAAACGGGGATGTATTACATTACTGCTAATAACTTCTTTTATCGTCCAAGTACCGAGAGAGGTAATGAAGTTGTTGATAGGCAAAATGCCTCAGAATTCTCAGATAGAATATCAAGTAGTGCAATTAATATTACTGATTCGCTTGTTTTTGATGCTTATACAAGCTCAACTAGTCTGATAGCTCAGGGATCAATGGGTGATCTCAAAGATACAAAGTTCTATACTCAAGAAACAAAACTAGTTAAAAAGCTATGGAATGATAAGCTTGAGATTTACGGCGGAACAGTTTTAGGAGCAAATCCATATCAGTTAAATAATATGAAT…
FTT0129	FLH204861.01X	FtCD00023015	DQ681441		major facilitator superfamily (MFS) transport protein	ATGAGCATAATCTTGAGATATCTAAAATACATTTTCAGTTATACTATGCAAAAAGTTACTAAAGCTGGTTTTATTATATGGTTTATATGTGCATTTTTTTATGCTCTAGAATTTATAATTAGAGCATCGGGAAATTCTTTATATAACGATTTCTCGATCGCACCATATAACCTAAGCCCTGAGCAAATCAGTGTATTAAGTTCAGCATTTTATTGGGCTTATGTGGCATCACAACTTCCAGCAGGAATCTTGATTGATAAATTTGGTGTCAAAAAGATAATGCTGGTGAGTACTTTATTATTTTCTGTTGGTGTTTTTATCGCTACAAGAGCCACATCACAAGAGTACCTAATTTTATATAGAGTTTTAGCTGGTGTTGGTGGCGGTTTTGCATTTTTA…
FTT0130	FLH150615.01X	FtCD00020376	DQ681442	glpK	glycerol kinase	ATGTCAAAAGATTTCATCTTAGCTGTAGATCAAGGTACAACAAGTTCACGAGCAATTATCTTTGATAAAAAGGGTAATATAAGAAAGATTGCTCAAAAAGAATTCACACAAATATATCCTAAAAGTGGTTGGGTAGAACATGATGCAATGGAAATATGGGGTACTCAAAGTGGCGTAATGCGTGAGGCACTAGAGTTTGGCCGCGTTAAGCCAGATCAAATTGCAGCAATAGGTATTACAAATCAGCGCGAGACAGTTGTAGTTTGGGATAAAGAAACAGGTGATCCTGTCTATAATGCTATAGTGTGGCAATGTCGCCGTACTTCGAGTATTTGTGATGAAATCAAACGAGATCCTCAATTTGTCAAATATATCAAAGAAAATACTGGTCTGGTTGTA…
FTT0132	FLH204887.01X	FtCD00023033	DQ681443	glpA	anaerobic glycerol-3-phosphate dehydrogenase	ATGAAAAAAGAATACGATATAATAATAATTGGTGGTGGCGCAACTGGCTTTGGTTGTGCTATTGAAGCAGTTTCTCGAGGTTACAAAACTCTACTTCTAGAAGCGAGTGATTTTGGTAAAGGAACCTCTTCGAAGTCAACAAAATTGATTCATGGTGGTTTAAGGTATCTAGAGAACTTTGACTTTGCTTTAGTTAAGGAAGGCTTAGAAGAGAGATTCTCTTTTTTACATAATGCGCCACATTTGACACATAAACAATCTTATCTTATTCCAACGCGTAGCTATTTTGAAACTATTAAATATACTATTGGTGTTAAGCTTTATGAGTTTTTATCAGGTAAGTATAAAATTGGTAAAAGCTATAATCTAAACAAACATCAAACATTAGCAGAGTTACCA…
FTT0133	FLH150288.01X	FtCD00020335	AY774759	glpF	glycerol uptake facilitator protein	ATGTTAACAGCATTTATAGCAGAATTAATAGGCACAATGCTACTTATCTTATTGGGTAATGGTGTTGTTGCTGGAGTAGTTTTAAATAAGACAAAAGCACATGATGGTGGCTGGATAGTTATTACATTTGCTTGGGGTCTAGCTGTTTTTATAAGTGTGTTAGTTGCTGGACCGATTAGTGGTGCTCACTTGAATCCTGTTGTAACATTATCTTTAGCTCTTGCGGGTAAGTTTTCATGGGCTTGGGTATTACCATTTATTATAAGTCAGATTATCGGAGCGATGCTTGGTCAACTATTAGTGTGGATTATGTATTATCCTCATTATTCAGCAACTGATAATCCTGAACTAAAATTAGCGACTTGTTGCACATCACCAGCAATTAAGCATTTGCCAGCG…
FTT0134	FLH150639.01X	FtCD00020379	AY774805		hypothetical membrane protein	ATGTGTGAAATAACTTTTATACCACTTTTAGCAGATGATGTTTTAAGATTGTTTATTTCTTTTATATTATTTTTAAGTTGCGTGATTTTAAGTTATATTTTTGCTAAGCAGAAACCTTGGGATATTGCTTTTTGGATTTGCTTTTCGATATTTTTATTTAGTATGGGTGGCTATGGTTATATCATTCATCATATTTATTTAGAAAATACTTTTTCATATGATGGTTTTATTTCTGGAGCAGCTTTTATTACGGTTTGTGGGTTATTGTTTTCAAGAAAAAGGTATATCAATTTTGCTGATAGTTTTGTAAATAAAAATACAGCTATCTTGATTGCAACTTTTGTTGTTTTTGCTTTAATCTATATTCTAACAATAAGATATAACTTTAGCTGTGTTGAA…
FTT0136	FLH204871.01X	FtCD00023024	DQ681445		Helicase	ATGCAAAAAACGTTACTTTCTTCAGATGAAATCCTCTATCTGCCTAACGGGCAAAAGATAGTTCTCAATCAACAGCAATTAGAAGCAGTAAATCAAATCAAAAAATTTCTCAAAAGTGATGAGCGTTATTTTTTATTATCAGGTTTTGCTGGTACCGGTAAGACTACTGTGGTGAAAAAAATCCTTGATGAATATCCTAAAAAGGCTATAGTGTCAGCACCTACCCGTAAAGCTAATGCTGTTATATCTCAAGCAACAGCAACACAAGGTTATACTATTCATTCGTTGTTGGGTTTACAACCAGATATAAATCTAGAAGACTTTAATCCAAATGATCCAGTATTTGGACAGATTAAAAAAGCGACTATTCGAAGCTATAATCTTATTATAATAGATGAG…
FTT0137	FLH204855.01X	FtCD00023009	DQ681446	tufA	elongation factor Tu (EF-Tu)	ATGGCTAAAGAAAAATTTGAGCGTTCGAAGCCGCATGTAAACGTAGGTACAATTGGTCACGTTGACCACGGTAAAACTACTCTTACAGCAGCTATTACAAAAGTTATGGCTGAGAAGAACGGTGGTATGGCGCGTAAATTTGATGAGATTGATAGTGCGCCAGAAGAAAAAGCGCGTGGTATTACTATTAATACTTCTCACGTTGAGTACGAGTCTCCTAATAGACACTATGCTCACGTAGACTGTCCAGGACACGCTGACTACGTTAAGAATATGATTACTGGTGCTGCACAGATGGATGGTGCTATTCTAGTATGTTCTGCTGCGGATGGTCCTATGCCACAAACTCGTGAGCACATTCTGCTTTCTCGTCAAGTTGGTGTACCAAAAATCGTTGTT…
FTT0138	FLH204848.01X	FtCD00023003	DQ681447	secE	preprotein translocase, subunit E, membrane protein	ATGCCTGTGTATAAATTATTTTTTTTGAAGGATTGTTTTGTGAAAAGGAATCAAGGTTTTAATAATAACAAAGTATGGATAAGTGGTGCAACCAAGACCACTGAAGTTAAAAAAATCTCAAAATCTAACAATTTGATGTTATGGTTGGCTGTTGTGGCTATCATTGTTTTGGGTGTTGCTGTTACTATGTATTCAGATATTTTGGGTGATAGCTATAGTACTTACAATACGTCTTTGGCAGTAGTTGTTGTGCTACTTGCTGTAGTTGTGGCTAGATTTACAAATCAAGGACGTCGTTTTTGGGCATTTTTCCAGGCTTCTAGGCTTGAGTTGGCAAAAGTTGTGTGGCCTACACGTAAAGAGACAATGACTATTTCTCTGATGGTGATAGTTGTGGTA…
FTT0139	FLH204862.01X	FtCD00023016	DQ681448	nusG	transcription antitermination protein nusG	ATGCTTTGGTATGTTGTGCAGGTGCACTCAGGTTACGAAAAAAGAGTGAAAGCTCAGCTTGAAGAAAATATCGAGATAGCTGGATTGAAAAATAATTTTGGCAGAATTCTTGTTCCTACTGAAAATGTGGTTGAGATGAAAGGTGGGCAAAAGCGTAAGAGCGAAAGAAAATATTTTCCAGGCTATGTTTTGATTGAGGCTGATTTATCAACAGATGCTTGGAATCTTGTTAAATCGGTTCCACGTGTGCTAACTGTTGTTGGTTCTAAGGGTAAGCCGATACCTTTGAGCAAAGCGGAAGTAGATAGAATATTAGATTTTGTCGAAGGAAGTAAATCCACTGTAGAGCCAAGATTGAGAAAATCTTATCACGTTGGTGAAGTTGTTCGAGTCCTAGAA…
FTT0140	FLH151956.01X	FtCD00020529	AY775003	rplK	50S ribosomal protein L11	ATGGCTATGAAAAAAATAGAAGCTATTATTAAGTTGCAAGTTGCAGCAGGAAAAGCTAACCCTAGTCCACCAATTGGTCCAGCGCTGGGTCAGCATGGTGTTAATATTATGGGATTCTGTAAAGAGTTTAATGCTAAGACACAAGGTATGGAGCCAGGTATGCCAATACCGGTAGAAATATCTGTTTATAGTGATCGTAGTTTTACGTTTGAAATGAAGACGCCACCTGCTTCTTACTTAATTAAGAAAGCAATTAATGTAAAATCAGGTTCATCAAAGCCTTCTAAAGAGTTTGTTGGAACTATAACTCGTGCGCAATTAGAAGAGATCGCAAAAGTTAAAGATCCTGATCTAACAGCTGCTGATTTAGATGCTGCTGTAAGAATTATTGCTGGTTCT…
FTT0141	FLH151845.01X	FtCD00020520	AY774980	rplA	50S ribosomal protein L1	ATGGCTAAAGTTTCAAAAAGAATGAAAGAAATCTCAGCAAAAATTAATGCTGAGAAAAAATATCCAGTATCAGAAGCTTTTGATCTTTTAAGAGAAGTTTCTTCTGTTAAGTTTGTTGAGTCTGTAGATGTATCTGTAGCTTTAGGTGTTGATCCGCGTAAATCTGACCAAGTTGTAAGAGGAGCTTCAGTTCTGCCTAATGGTACTGGTAAAACTGTAAGGGTTGCTGTTTTTGCAAAAGGTCCTGCAGCTGATGCGGCTAAAGAGGCTGGTGCTGAAGTCGTTGGTATGGAAGATTTGGCTGATGAAGTTAAAAAGGGTAATATGGATTTTGATGTTGTCATTGCTTCTCCAGATTCTATGAGAGTGGTTGGACAACTAGGTCAAATACTAGGTCCT…
FTT0142	FLH152036.01X	FtCD00020536	AY774992	rplJ	50S ribosomal protein L10	ATGGCACTTAGAATAGAGGATAAAAAAGCAATTGTTGCTGAAGTTGCTGAACAAGTGTCCTCAGCATTGTCTGCAGCAGTAGCAGACTACCGTGGTTTGACTGTTAATGAAATGACTTCATTAAGAAAACAAGCTCGTGAGTCTGGAGTTTATTTAAGAGTTGTGCGTAACAACTTAGCACGTTTAGCAATTAAAGGAACTGAGTTTGAGTGTCTTGCTGATGCTCTTAAAGGTCCTCTTGTTCTTGCTCTTTCTAAGGATGAGCCAGGTGCAGCAGCTAAGCTATTCAAAAACTTTCAAAAAGATCATAATGCTTTTGAAGTTAAGAATTTGGCTATGTCTGGTGAACTGTTTGGTCCTGAAAAGTTAGATGACTTTGCTAAGCTTCCTACTAGGGAA…
FTT0143	FLH151908.01X	FtCD00020526	DQ681449	rplL	50S ribosomal protein L7/L12	CTGGCTTTAACAAAAGAAGATATCTTAAATGCTGTTGCTGAAATGAGCGTTATGGATGTATGTGATTTAGTTAAAATGATGGAAGATAAGTTTGGTGTTTCTGCTGCTGCAGCTGTTGCTGTTGCTGCTGGTCCAGTTGCTGGTCCTGCTGAAGCTGCTGAAGAAAAAACTGAGTTTGACGTTGTTTTAGTTGATGCTGGTTCAAATAAAATTGCTGCTATTAAAGCAGTAAGAGGCGCAACTGGTTTAGGTCTTAAAGAAGCTAAAGATGCTGTAGAAGGTACTCCTTTCACAGTTAAAGAAGCTGCTTCTAAAGAAGAAGCAGAAGTTCTTAAAAAGCAACTTGAAGAAGCTGGCGCTAAAGTTGAGCTTAAATAG
FTT0144	FLH230131.01X	FtCD00039300	DQ681450	rpoB	DNA-directed RNA polymerase beta chain	ATGTCTTACTCATACGCTGAGAAAAAAAGAATTCGTAAAGAGTTTGGGGTTCTTCCTCATATCTTAGATGTACCATATTTGCTTTCTATTCAAACAGAGTCATACAAAAAATTCTTGACTGCAGATGCAGCAAAAGGAAGACTTCACTCTGGACTTGAAATAGTTTTAAAACAGTCTTTTCCTGTTGAGAGTAAAAATGGTCAATATGAACTTCACTATGTTGATTATCAAATTGGTGAGCCTACTTTTGATGAAACTGAATGTCAGGTTCGTGGTGCTACTTATGATGCACCATTAAATGTGAAGTTAAGATTAGTTGTATATAATAAAGATGCTCTTCCAAATGAGAAAATTGTCGAGGACATTAGAGAAGAGTATGTGTACATGGGCGATATTCCG…
FTT0145	FLH230137.01X	FtCD00039302	DQ681451	rpoC	DNA-directed RNA polymerase, beta subunit	ATGAATAACGGTATCCTACATCAAAATTACAATAGTAAAAAGTTTGATATTATTAAAATATCTTTAGCATCGCCTGAGGTTATTCGTTCGTGGTCTCATGGTGAAGTTAAAAAACCAGAAACTATAAACTATAGAACATTTAAGCCTGAAAGAGACGGATTATTCTGTGCTAAGATATTTGGTCCAATAAAAGACTATGAATGCTTATGTGGTAAGTACAAAAGACTTAAGCACCGTGGCGTAGTCTGTGAGCGTTGTGGTGTTGAGGTTGAGCAAGCTAAAGTAAGAAGAGAAAGAATGGGGCACATTGATTTAGTATGTCCTGTAGTACATATTTGGTATCTAAAGTCTTTACCTTCTAGAATTGGTTTATTTTTGGATATGCCATTAAAGAATGTT…
FTT0146	FLH204820.01X	FtCD00022982	DQ681452		hypothetical membrane protein	ATGTTTGATATGTTAGCAAAGCTCTTCTGGCAAATATTTTTTGGGATATTGATAATCCTGATAGTTATATTATCAATATTAAATACTGATAAGGTAAGCTTTGACTATATTTTTGGTACTACTACGCTGCCATTAATTGTCTTAATGTCTATAGCTTTTGTTTTAGGCTTATTGCTTGGTTCTTTTATAACTAAGTTTATTCAGATAACTAAAACAAGTGGTGGCGCTAAAAAGTAG
FTT0147	FLH152008.01X	FtCD00020533	AY775022	gcp	O-sialoglycoprotein endopeptidase	ATGATAGTACTTGGTATTGAGAGCTCCTGTGATGAAACAGGTTTAGCGATATATGATTATTCAAAAAAGAAATTAATTGCAGATGAATTATATAGCCAAGTCAAATTGCATAAGAAGTATGGTGGTGTTGTACCGGAACTTGCCTCGCGTGAGCATATCGCTAAGCTTAATCTTTTAGCTAAGAAAATATTCAAAGAAACTGGTCTTAGCTTTGAAGATATTGATTGTATAGCATATACCGCGATGCCTGGTTTAGTTGGTGCATTGATGGTTGGAGCTACATTTGCCAAAACACTAGGCTTAATCCATAATATTGATACAATTGCAGTTCATCACCTTGAGGGTCATCTTTTATCACCATTATTGGATCACAATAGTAATATAGAATATCCTTTCGTA…
FTT0148	FLH204853.01X	FtCD00023007	DQ681453		fatty acid desaturase	ATGAATAATAATGAAATAATACACCAAACCATAGAAAAACAAGGTAGCATAGTCTGGAAGAGTGTTTTTGGGTTGCTACTTCTACCATTGGTGGCGCTTATAGCTATTCCTTGGTATGCTAAGACTTATGGCTTTTCAACATCAGATTATGTATGTCTAGTAGTCTTCTATATGCTTACTGGTGTTGGTATTACAATGGGTTACCATAGACTGTGGTCACATAAAACATATAAGGCAAACAAAATAGTAAGTTATGCTCTTTTATTATTTGGCACAGCAGCACTACAAAATAGTGTAATTCAGTGGTCTTCAGATCACAGAAAACACCATAAAGATGTTGATGATCCTATCAAAGATCCATATGCTGCTACACGTGGTTTCTGGTTTTCACATTTTGGC…
FTT0149c	FLH204851.01X	FtCD00023006	DQ681454	metK	S-adenosylmethionine synthetase	ATGTCAAAAAATTACCTATTTACTTCTGAATCTGTATCAGAAGGACATCCAGATAAACTAGCTGACCAAATATCAGACGCAATCCTAGATGAGATTTTAAAACAAGATAAAAATGCTCGTGTAGCATGTGAAACTTTAGTAAAAACTGGTATGGCTTTAGTTGCTGGAGAAATTACAACATCTGCTTGGGTAGATATCGAAGAATTAGTAAGAAATGTTATTACAGAAACAGGCTATGATAATGCTAGTAAAGGTATTGATGGTAGAACTTGTTCTGTAATTAATGCTATTGGTAAACAGTCTAGAGATATTACCCAAGGCGTAGATCGTGGCTCCCTAGAAGATCTTGGTGCTGGTGACCAAGGATTAATGTTTGGATTTGCTACAAATGAGACACCA…
FTT0150	FLH151841.01X	FtCD00020519	AY774976	rpsP	30S ribosomal protein S16	ATGGTAGTAATTCGTATGGCTCGTGGTGGAGCTAAAAAGCGTCCTTTCTATAGAATCGTAGTTGCTGATAAAAGAAGTCCAAGAGATGGTAGATTTATTGAGAAATTAGGTTTCTTCAATCCTTTAGCTAAAGGTGGTGAAGAGAGATTAAAGCTTGATGTTGCTAAAGCTGAAGCATGGTTAGCAAAAGGTGCACAACCTTCTGATAGAGTAGCAAGCTTAATCAAAGAAGCTAAGAAAGCCGCTTAG
FTT0151	FLH204860.01X	FtCD00023014	DQ681455	rimM	16S rRNA processing protein rimM	ATGTCACAGGATTTTGTAGAAATAGCCAAAATTGGCGCTACTTATAAGCTTAATGGTGAGCTTAATTTATATCCTTTGGCAAATTCAATAGAAACACTTCTAAGTTATGGTGATTGGTATATCCAATTACCAGCGACTAATGTTTGGCAACAGCTCAAAGGTGAAAGTGTACTAAAGAGGGCTGATAAAGTTTATATTAAACTTGCTAACATTAACAATGCTGATACTGCTAAGAAATATGTAAATGCACTGATTGGTGTGCCAAAGCGAGCATTACCACAGCTAGCAGAGGATGAAGTGTATTTTAAAGATTTAATTGGTTGTAGTGTCAAAAATATTAACAATGATTCATTTGGTGTTGTTGTAGATATTATTGAAACTGATGCTAATGAAGTTTTG…
FTT0152	FLH151880.01X	FtCD00020523	AY775004	trmD	tRNA (Guanine-N(1)-)-methyltransferase	ATGGAGATGAAATTTGGGATAATATCAATATTTCCAGAGATGTTTAAAGCAATAAATGATTTTGGAGTTACAGCAAGAGCTATAAAGGACTCTAAAGTATCGATAAGTTGCTTTAATCCGCGTGACTACACTACAGATAGACATGCTACAGTCGATGATACTAGTTTTGGTGGTGGCGCAGGGATGGTAATGAAGTATCAACCTTTATCAGCAGCTATTGAAGATGCAAAAAATACTTTAGGTTGTGGTACAAAAGTAGTATACTTGTCACCTCAGGGTAGTATATTTAATCATAGAAAAGCCCAAGAGCTTTTGCAAAATGATTCATTAATACTGCTCTGTGGTAGATACGAAGGGGTTGATGAGCGCCTAATACAAGATTATGTTGACGAAGAAATT…
FTT0153	FLH204830.01X	FtCD00022989	DQ681456	rplS	50S ribosomal protein L19	ATGAAAAATAAATTTGTTGAGCTAGTAGAAAAGTCACAATTAAGAACTGATCTTCCAGAATTTAATCCAGGTGATTCTATTACTGTTAATTTATGGATTAAAGAAGGCGATAAGCAAAGAATTCAGGCTTTCAAAGGTTTCGTTCTTAGAAAAAGAAATAGAGGTCTTCACTCTGCTTTCACAGTAAGAAAGATGTCTTCAGGTATGGGTGTTGAAAGAACTTTCCAAACACACTCACCATTAATAGATAGTATTATTGTAGAGAAGAGAGCAGATGTACGTAGAGCTAAGCTTTACTATATGAGAGGTCTTACTGGTAGGGCTGCTAGAATTAAAGAAAAAGTATAG
FTT0154	FLH151944.01X	FtCD00020527	AY774996	xerD	Integrase/recombinase	ATGTCCTCAGCTGTTGATGCTTTTCTTGATAATCTCTGGCTTGAGCATGGATTAAGCCAAAATACTATTTCATCTTATCGTACTGATCTTAAATTCTTACAAAATTATTTTGCAAAAACTGATTTAATTAGTTTAGATTTTGAGCAGTTATATGCGTTTATTTCATATCGTTCAAAAAATGGTTATAGCAGTCATTCTAATGCTCGAATGATATCGACATTGCGTAAATTCTATGCTTGGCTTATCTCAACTGGTCAAACTAATAATAATCCTACAGCTAAGCTAACATTACCAAAATTAGCCAAGAAGTTACCTAAAGATATGACAGAAACTGATGTTGAGAGATTGCTTCAAGCTCCTGATATGACAGAGGATGTTGGTATTCGCGATAAAGCAATG…
FTT0155	FLH204890.01X	FtCD00023036	DQ681457		oxidoreductase iron/ascorbate family protein	ATGGTAATGAATATCCTTAGTGTTGATTATTATGCAGATGATGCAGCTGAATTGTTTACTAGATCATTAAAAGAAACTGGTTTTGCAGTACTTAGAACTCACCCTATTGATTGGAACTTGATTCAAACGGTTTATAAAGAGTGGCAAGAGTTCTTGAAATCTGGTGCTGCTGATAAGTATATCTTTGATGTTGAAAATCAAGATGGTTATTTTCCTATAGATGTCTCAGAAGTTGCTAAAGGTGAAACTGTAAAAGATATCAAACATTTTTATCACTTGTACTTTCCAAATGGTAGATATCCGACTGAAGTTAGTAGTGCTGCTAGAGAAATGTTTGAGAAAATGATTAGGCTTGGTGAAACGTTATTACAGTGGATTGATGATTATATGGATCCAGCA…
FTT0156	FLH151775.01X	FtCD00020512	AY774993		acid phosphatase	ATGACGCATCAACAAGTTATTAGCTATTATGAGAGTACTGCTCATGAAAATGAAGTAGAGCTAATTCTCGCGAGAGCTAAAAAAATAATCCAAGCACAACAATCACTACAAGGTAATGCAATAGTTCTTGATATAGATGAAACAGCCTTAAACCATTATTATTCTCTTAAACTAGCTGGTTTTCCACAAGGTGAGAATCATACTATTTGGAATGAATTACTCTCAAGAACTGATGCTTATCCGATTAAGGCGACATTAGATTTCTACCTTTACTGTCTTACTAGTGGTCTTAAAGTATTCTTTATCAGTGCGCGTTTTGCTCAATACTTGGAATCTACTAAACAGGCTTTACGAAATGCTGGATATGTGAATTTTGAAGATGTGTTTGTATTTCCAGAG…
FTT0157c	FLH151952.01X	FtCD00020528	AY775002		licB-like transmembrane protein	ATGAATTTTAATAAGCGAGCTTTTGTTTTTGGCTCTCTATCAGGAATTTTTTGGGGACTTGACTATACATTAGCAGGTCAAGTACATACCTTATTAACTATGACATTCTTAGTATCAATGTGGCTGACGTCAATTCATGACTTAGGTGTTGCAGCGACAATAGCTGCTATATCAACTTCATCTGTAAAAAGAATCAAAGACTTAAAGCTTTGGCAAATTATAAGTATTTGTTGTATTCCTTTATTAGGTGGTTTTGCGATGACGATGTATATGCTCTCAACACGAGATATCGCAACTGGAACAGCTATTATTATATCATCGTGCTATCCAGCAGTAGGAATGATTGGAGCAAGAATTTTCCTTAGAGAATCTCTAACAACATTCAAAATAGTTGGTTTT…
FTT0158c	FLH204870.01X	FtCD00023023	DQ681458		hypothetical protein	ATGATTATAATGCTAGCGTTATTAGGATGTTTAGCATTACCATTTGCTTTCGCGGTCTTTTTGGGTGCGCCAATACCTCTAAGGATACTATTTCCAATACCTCTGAGTATTGCTATAGTGATGTTATTAATCTTTAGAGTAACTTCTAACAAGAAGCTAATTATCGCTATAGCTTGTTTATGTTTATTTGTGAATTTTAAACAAATCTGTCAACTAACATATAGTCAAAATATGGTGCAAAAATATAATGAGTATAATTTAGAACATTTATACTCTATTTTACATGATAAGTTTGGCAATAAACTCTATAACACTCCAGTAGTCTTTATTGCTAGTCCCAAAGCTGATAATAGTTTTTATATAAGACATATTTATTCTGAGCCTTTTTATTTTAACAGT…
FTT0159c	FLH204888.01X	FtCD00023034	DQ681459		hypothetical membrane protein	ATGAAAAAACTAGTAACAGATTTACGAAACTTACCAAATAAACTTATCTATAGCATAATTGTGTTATTTTCTGTATTTATTGTTATTTATGCTTACTTCATTTTATCTTGGAGTATCGGTATGGATACAAAGCTTGCAACCTATGGTTTAGGTAATAGTGAGTATTTATATCCATTACATACCCAGTACTTTCTTTTAGACAGACCAACCTTAGCAATTATAACTTATGTTTTAGGACAAGTTGCTATTCCATATTTTACTTTACTGATAAGTATGTCTTTACTATTTGTATCTGCAATTATTTGGATGGTTATTCTTACTAAGAAAAATTTCTCTATAATCGAAACTTTAGTTTTTTGTAGTTTCTATCTTATTTCTCCTATTTATATTTTTCAGTTT…
FTT0160	FLH151980.01X	FtCD00020531	AY775005	nudH	(Di)nucleoside polyphosphate hydrolase	ATGATAGATAAAAGTGGGTATCGAGCAAATGTGGCGATAGTTTTACTTAACAAGCAAAATAGAGTATTTTGGGGACAGCGAAGAAACCGCACATCTTGGCAGTTTCCACAAGGTGGTGTAGCTACTGGAGAAACACCTTTGCAGGCAATGTATCGTGAGCTACATGAGGAGATTGGCTTGCGTCCACAAGATGTTGAGGTAATCGCTTCAACAAGAGATTGGTATAAATATGATATTCCAGACTCATTAGTTAGAACTAAAGAACCTATATGTATTGGTCAAAAACAGAAATGGTTTCTATTAAAATTAAAGAGTCCTGAAAGTTATATTGATTTAGACGCTAATGACTCACCTGAATTTGATAATTGGCGTTGGGTAAGTTATTGGTATCCAATCAAT…
FTT0161c	FLH204872.01X	FtCD00023025	DQ681460		PAP2 family protein	ATGAATTACTTTGACCATAAACTTGCAAAAACGACTGCTATATACGGATTTTTAACACCAATAATTGCAATACTAAGCTATAATTTCCTTGATATAAAATTTGCAACACTAGTACATTCTAGTGAATTGTTTGGTACTGGAATTAGTACTATAGCTCCTTTCACTTCTAATATTTTTTCTCCTAAAGTTTGGACTGTTATTACAGCTATAGCCACAGTAATTTGTATCTACAAACACATAGTAAAAAAGCCCTCACAAAAGTTGTATATAATGTCATTATCTTTAATAATGACTATTATAATTACAACTATTGTTAAGGTTATACTTGCTAGATATAGACCTGAAATGCTACTGTTTGATAATCACTATGGTTTTCACTTTTTTTCTTTTAAAAAGGCT…
FTT0162	FLH152052.01X	FtCD00020537	AY774982	ampD	N-acetylmuramoyl-L-alanine amidase	ATGTTTAATCAAGGTTGGTATAAAAAAGCTAAATGTATTAAGAGTCCGAACTTTAATCAACGAGCTGATAAAAATGATATTAACCTAGTTGTAATACATTGTATAAGTTTGCCTGAAGGAGGATATGCCAATTGTAATGTTGAGAAATTTTTTACCAATCAATTAGATTGTAGTTTGCATCCAAGTTTTGCAAGCCTTAAAGGTGTAGAAGTTTCAGCTCATTTTTATATAAAACGCGATGGTGAAATTGTGCAGTTTGTTTCTGTTGATGATAGAGCATGGCATGCAGGAGTAAGTGAATTTCAAGGTAGGCAAGGTTGTAATGATTTTTCTGTAGGAATTGAGTTGCAGGGTACTGATAAAACAGCTTATACTGAACAACAATATCTTAGTTTGAAT…
FTT0163c	FLH204893.01X	FtCD00023039	DQ681461	parE	Topoisomerase IV, subunit B	ATGCAAAACTATAATGCTAAATCTATCGAAGTTCTTACTGGTTTAGACCCTGTCAAGAAAAGACCAGGAATGTATACTAATACAGAAAATCCAAATCATCTCATCCAAGAAATTATTGATAATAGCGTTGATGAAGTTCTTGCTGGATTTGCTAGCAAAATAAATATCACATTATACGAAGATAACAGTATCGAAGTAGCTGATGATGGTCGTGGTATGCCTGTAGATATTCATCCTGAGCATAAAATGTCTGGTATTGAACTTATCATGACCAAACTTCATTCTGGCGGCAAATTTAGTAACAAAAATTATACTCATTCTGGCGGTCTTCATGGAGTTGGGGTATCTGTTGTTAATGCTTTATCAACTAGACTTGAGGCAGAGATTAAAAGAGATGGT…
FTT0164c	FLH155928.01X	FtCD00020919	AY774181		Eflux protein	ATGTACAAAGGTGTCAGACCATCAATATTTATCTTAATTCTCATGGTCTCTTTGGGACCATTTGGTGATACCATTTATGCACCAGCATTGCCTGAGTTAAAAACAATTTTAGGTACTGACTATCCCCATGTGCAGCTTACTATAACCTCATATTTACTTGGCTACTCGATTAGTCAGCTATTGTATGGACCATTCTCTGATAGATTTGGTCGCAAACCTGTAATGTTGGTAGGAACATGTTTTTTTATAATTAGCTCTATAATATGTATATTTAGTAACCATATCAATACTTTGATATATGCTAGAATGATACAAGGCTTTGGTGCAGCTGCTGGTGGAGTTATTGCTACAGTTGCTGTTAAAGATGCTTTCAAAGTTAATGAGCAAGGCGCAGTATTT…
FTT0165c	FLH204867.01X	FtCD00023021	DQ681462		conserved hypothetical lipoprotein	ATGAAAAAACTATTATTTATTACGGCTCCTTTGCTGTTATCTGTATTAACAGCTAGTTGTTCTAAAAGTAACGTCCCGCCTCCTACTCCATTAGCTGAGAAACCTCCTAGAGAAACTTTTGTAAAAGTCATATGGAAAAGAAAAACAGGAAATGGTAATGGCGGCTTAGCGAATTACAATGTTGCCCCAGCTTATGCAAATGATACCGTATTTGTTCCTAATCAAAATGGTATGGCTTATGCTCTAGCGATTACTAATGGCAAAATAATCTGGAAAAATGATACTGGTACAAATCTATCAGTACAACCAAATACTATAGCAAACGCGGTTATTTTTGGCTCCATAAAAGGAACATTAACTGCTATCGATGATAAAGATGGTCAAACACTATGGCGTACA…
FTT0166c	FLH155705.01X	FtCD00020892	DQ681463		conserved hypothetical membrane protein	ATGAAAAACTTATCCAAGAAACAAACTCAAGCTTTATATACAATAGCCGGAATAATCATAGTTACAATAATTTGTGCAATATTTTTGCAGTTTTATAACTCCAGCAATGATAAAAAAATGCTCGAAGCATCAACAATATATCAAAAGGCGCTAATAGCTAATGAAAACCCAAAATCATCTGTTGAGACAAAAATCGCCAAATTTGAACAAGTAGTTAACGACTATCCAAATACTAGCTTTGGCATATTTGCAAGTTGGCAATTAGCTGATCTATATACTACGCCAACAAAACCAGATTCAAAAAATTTCAATGTAAATATCACTAATTTACCAAAAGCTATCGCCATATTACAACAAAGTATAGAAAATAATCCTAAAGATAGTCTTAGTGATATTAGT…
FTT0167	FLH155952.01X	FtCD00020924	AY774197	hemA	Glutamyl-tRNA reductase	ATGAAGGTGGCGTTAATATCTTTAGCAATTGATTATAAAAAGTCTCCGATAGAAGTTCGTAGTGAGTTTGCACTCTCTGGTTTAGATGTATCTATGCTATATAGATCAATACTTGCTATAGATAATGTTGTACATGCTGTAATCTTATCAACTTGTAATCGTACAGAAGTATATCTTGAGATATCTGATCTAAGAGTAGTTGATGATATTTTAGTATGGTGGCAAGGCTATGTTAGAAACCCTAATTATAAAATAAAAGATTATTTTAAGCTAAGACAAGGTACAGAAGTAATTATGCACCTTATGAAATTGGCTTGTGGTTTAGAATCGATGGTTTTAGGTGAACCGCAAATATTAGGACAAGTAAAAGATTCTTATACTCTCAGTAAAAAAAATCAT…
FTT0168	FLH155896.01X	FtCD00020916	AY774224	prfA	peptide chain release factor 1	ATGAAAGATTCTATTAAAGCAAAATTGCAAAGTTTGATAGAAAGGCATGAGGAAGTTAGTGCCTTATTAAGTGAGGCAGGAATTATCTCTGATCAAAATAAGTTCAGAGATTTATCAAAAGAATACTCTCATCTTGAGCCGATTGTAAAGGCGTTTAAAAAATATACACAAGCTTTAGAAGACAAACAAGCTGCTTATGAAATGCTTAATGAAAAAGATGCTGAGCTTGTAGAGATGGCAAAAGAAGAATTAAAGTTGGCAAATGAAGCTATTGAGAAACTGGAGAGTGAATTACAAATATTTCTTTTACCTCGTGATCCTAATGATGATGCTAACGTTTTCTTGGAGATTCGTGCAGGAACTGGCGGTGATGAGGCTTCGATATTTTCAGGTGATTTG…
FTT0169	FLH204892.01X	FtCD00023038	DQ681464		hemK protein homolog	ATGAGTAATATTACAATTTCTCAATTATTAGCTTTAAGCTTAGCTAAATTTAATCAATGCGATATATCAACCAAACATGATCTACAAATGATTATTTGTGATGTTTTGGGTGTTGATAAAACTTATCTTTATATAAATTTGGATAAGCAGTTAGACAAAAATACACTTAAAAAAATAGATGAGAAAATCTTACGTCTTTTAGCTGGTGAACCATTGGCTTATATTCTTGGTTATAAGTATTTTTGGAATCAAAAACTTTATGTAACTAAAGATACTCTCATACCACGGGCAGATACTGAGACTGTTGTTGCTACAGTGTTAGATGATATACAAAATAAGGACGCTCAATTAAAAATTTTAGATCTTGGTACAGGTACGGGAGCGATAGCTTTGGCTTTA…
FTT0174	FLH156562.01X	FtCD00020995	AY774272		YggT family protein	ATGTTAAATGCCTTAATTAATGTTGCGACTTTTTTAATAAATATAATCTTTGGATTATACGCGTTTATATTGCTATTTAGATTTTTTCTCCAGTGGGTAAAGGCAGATTTCTATAATCCAATTTGTCAGCTGGTCATGCGTGCAACAAATATTGTTATTCTGCCATTGAGAAAATTTATTCCTGGGTTTTTAAATTTAGACTGGTCATGTATAGTCGCAGTTTATATTGTATTTGCCATTAAAGATTTACTTCTGGGTTGGCTTTATGGTTTTGGATTTGAGTTAACTTTTATTTTGGTTAAACCCATTATAGATATAGTCTTTGCGGTAATAAATATGTATGTATATTTGATAATAATAAGAGCAATATCTAGTTGGTTTGTTCAAGGAGGCTATAAT…
FTT0175c	FLH156721.01X	FtCD00021018	AY774261		ABC transporter, ATP-binding protein	ATGGCTCAGCTTAAAAATAATAGTTTAATAAACTGCTATAACATTTGTCTTGAATATCATCAAGATAAAAAACTTACAAAGAAAGTAATTGAGAATCTAAACCTTAGTATTAGAGAAAATGAAATAATCGCTATAGTTGGCAAATCAGGAGCAGGAAAATCTAGTCTTGTAAGAATATTAAGCGGGATATTAAAACCAACTTCTGGAAAACTTTTTTATAAGGGTTCGGCTATTGATGGTCCTTTAGAAAACATCAGTATGGTTTTTCAAAACTTTGCTCTTCTACCATGGCTAAATGTTTTAGAGAATGTTCTTTTTGGCGCAGACTCTCTCGGTATACCTAGATCACAAAGCAAGCCTAAAGCTCTTGAGATTATCAAGAAGATTGGCTTAAATGGC…
FTT0177c	FLH156482.01X	FtCD00020982	DQ681467		Acetyltransferase	ATGCAAATATCTAAAGCTCAACTAACAGATCTTCAAGCACTTATAGATCTAGAAAACTCTACTTTTTTATCTGATAAAATTTCAAAAAAACAATTTGCCTACAATATTAACAAGCAAAAATATTTTTTTGTCGCTAAGCGACAAGATTCGTTAGCTGGATATATTCTATGTTTTGAATATAAAAAAACCATTAGGGTGTACTCCCTTGCTGTAAGCAAAAACTATCAAGGACAAGGAATTGGCAAAAAACTCTTAGAATATATCTTAAACAACACTGACAAAAATATTTCATTAGAAGTAAATACAAATAATTTAATAGCTATTTCTCTATATCAGAAGCTAGGATTTGAGATAAATAAACAGATTAATAACTATTATGAGAATGGTGATGCTGCTTAT…
FTT0178c	FLH156681.01X	FtCD00021012	DQ681468	rimK	30S ribosomal protein S6 modification protein-related protein	ATGAAACCTTTAAAAATACTTATCGATAACAAAGATATATGGTCACCATACTATCCTTATTCAAATCTAGAAACAACCCACCAATATCTACAAAATATTAGTACTAAACCTAACTACATTATAAATCTATCTGAACAAATGAATTACCTAGAGCAAGGGTATTATGCTTGCCTTTTAGCACATTCAAATAAAGATACGATTATACCAACAGTTGAAACTTTAAATAGTATTAGCCATTTCGAGCAAACTCTACTATCTAATTTGGTTAATAATAAAGACTATAAATCTCTAAACACGTTAAATGTCGATTTTTTAGCTATTAAAGTTTTCTTTGGAGTTGCTAATATAAAAGGTATTGAAAAAATAGCTAAAAAAATATTTGAAACATATCCTGCACCA…
FTT0180	FLH204748.01X	FtCD00022933	DQ681469		Acetyltransferase	ATGATAAATACATTGAAGTATGGCTACTATGCGCTATTTTCTGTAGTCTGTTTTGCATCTAGTGCCATTATAGCTTTTATACCGATATTTATTTTCTCGTTAGTTAAGCTTTTGATACCAATAAAGCGAATAAGGCATTTATGTACCTCAGCAGTACAATTATCCGCAAGTTTGTGGGTAAGTTTTGCCATTTTAATAACTAAATTATTTTCCCCAACAAAATTTGAGATTGAGCAGAATGCAAAACTTGATAGTCAAGGATCTTACTTAATCATATGTAACCATAAAAGTTGGCTAGATACTTTTATATTGATGTTGGTATTCCACAAAAAAATAGCATTTCCTAAGTTTTTTATGAAATTTCAGGTATTTTTTATTCCAGTTTTAGGGCTGATTGCG…
FTT0181c	FLH156527.01X	FtCD00020989	DQ681470		conserved membrane protein	ATGGAAAAGATTAGTCATAAAGATATACAAGATAAATTATGGAGTAATGAAGATGAAAGTAATTTATCAAATGAGCAATATAATTCACTACTAATTGAACAGTATAGAATCTATGTTGAATTAACAGACAGAACTAGCTATAGAAGGATTGTTATTAACCTATTCTTTTTGGTTTTTAACCTTGTTCTAGTCGGAGTTGTTGCCTTAGCTATTAGTAACAACATTAATGTCGAAAATCCTCCATCTAGTATACTTGTGAGTATTCCATACTTTGCTGGGTTAGTATTTTGTTATGCTTGGTGGAAGATTATTAGATTCTTTAGACACCACATACAAATAAAAAATAGTATTGTGCCATCACTTGAAAGACGTCTTCCTTCAAGAGTATGGTTAACAGAA…
FTT0182c	FLH156538.01X	FtCD00020991	AY774259		Sua5/YciO/YrdC family protein	ATGCTTACAAAAGATTTGAATAAAATCTTCGGTGAAATAACAGAAGATAATGTTGTTAGTATTCCTACAGATACAGTATATGGGCTAAGTTGCAACATCTCTAAAGCTGCCGTAGCAAAAGTTATAAACTTAAAAAAAAGGGATTCAAGCAAAGGTTTTATTATAATCTCACATGATCACAAGCATTTACTCAAGTATGCAGATACAACTAAACTATCTAATGAGCAAATCAATAAAATATCCTCTAAACAAGCTCAACCAACTACTTGGATAGTACCAGGTAAGAAAGATATTCAATGGTTAACTGGTGATAAAACAACTATTGCCATACGCTTAGTAACAACTGAAATAGTAACTTATATTTGTGAAAATATTAATGATGCTATTATTTCAACTAGT…
FTT0183c	FLH204808.01X	FtCD00022977	DQ681471	rpsA	30S ribosomal protein S1	ATGTCAGAAAATTTCAAAGAACTATTTGAGCAATCTCTTAAACAAACAGAGATGAGAATAGGTAAAATCATCGAAGCAACTGTAGTAAGCATAGACAAAGAATTTGCAATGATTGATGCTGGTCTTAAGTCAGAATCATTCATCCCTGTATCTTCTTTAAAAAATAGCAATGGTGAGCTAGAAGTTGCTGCTGGTGATAGAATCAACGTTGTTTTAGAAGCTCTAGACAACAGTTGCGGTGAAACTAGATTATCAAGAGATAAAGCTAAGAAAATCGAGCTTTGGGATAGAATTGAAAAAGCTTTCGAAAATAACGAAACAGTTCTTGGTAAAATCACTAATCACGTTCGTGGTGGTTACACTATGGATGTTGAAGGTTTAAGAGCATTCTTACCTGGC…
FTT0184	FLH156497.01X	FtCD00020984	DQ681472		Zinc-binding domain protein	ATGTCTAATTATTCAGATCAAGATATTTTTTTTATGCAAAAAGCTTATCAGCAGGCATTGTTAGCTTATCAAGCTGGTGAAGTTCCGATAGGTGCAGTGCTTGTCAGGGATGATCAAATAATTGTACAAAATTTTAACCAAACTATAGGTTTAAATGATCCAACAGCACATGCAGAAATCTTGGTTTTACGCTCAGCAGCATTAAAGCTAGGCAACTACAGATTAGTCAATACAAAATTGTATGTTACTTTAGAGCCATGTATAATGTGTTTGGGTGGTTTGATTCAGGCAAGAGTACCTGAGCTGGTTTATGCTTGTGATGATAGTCGAGTAGGAGCTTTTTCACGTGAAAAACTTCACCACAATAAGAATATTAACCATAATCTTGGAGTAACAGCT…
FTT0185	FLH156467.01X	FtCD00020981	AY774270	ddlB	D-alanine--D-alanine ligase B	ATGAAAATCGAAAAAATTGTTGTTTTATATGGTGGCGACTCTCCAGAAAGAGAAGTTTCTTTGAAATCTGGTAAAGCAGTTTTGGATTCTTTAATAAGCCAAGGTTATGATGCCGTAGGTGTGGATGCTAGTGGTAAAGAGCTGGTAGCAAAACTTTTAGAATTAAAGCCAGATAAGTGTTTTGTTGCATTACACGGTGAAGATGGTGAGAACGGTAGGGTGTCAGCATTACTTGAGATGTTAGAAATCAAGCATACAAGCTCATCGATGAAATCATCTGTAATTACTATGGATAAAATGATCTCTAAAGAAATATTGATGCATCATCGGATGCCTACACCGATGGCAAAATTTCTTACTGATAAATTAGTTGCAGAAGATGAGATTAGCTTTCCTGTT…
FTT0186	FLH151757.01X	FtCD00020511	AY774940	ftsQ	cell division protein FtsQ	ATGACAAAAATTATCAAGAAGTTTCTAATATTGAGCTTGATACTGTTAGTAATCTTGGGATCGACTATTTTTGTTGCTGCTAAAACAGATAAGACAGTTTCAAAGATTGATGTTGTATCTAACGATGGGCTTATTTACATATCTAAGCAAGATTTAATCAATAAAATTGCTACGCTTGATAATAAACAATGGTTTGATATTAATATTGCTAATATTGAGAAATATATTTACTCAATCGATGGTGTTGACTATACATTGGTGAAAAAAGTCTGGCCATCGACATTGGTAATATATTTATATGACCATAAGCCTGTAGCTTACTGGAATAATAATCAGATCCTTCTTGATAATATGCAAATCATCACTCCAGCAGTTTTTAACTATAATGGTGATTTACCA…
FTT0187	FLH204788.01X	FtCD00022961	DQ681473	ftsA	cell division protein FtsA	ATGGGTTTTGGGAATATTAATTTTTGTGCTGTAGATTTAGGCTCGCACAAAATAACAGTTGCGATTGGTCAACTTGCTGAGAATAACAGTATAAAGATATTGGGAGTTAGTCAGAAACAGTCAAAAGGGATCAAGCAGGGTTCTGTAATTAACCTTGAAATCGCTATGGAAACTCTTAATGCTGCTCTTGATGAGGCTAAGAGTATAGCAGGTGTAGATGTTAAGGAAGTTACTCTAGGTGTTAGTGCACCTAGTATTAGTGGTTTTAACTCATATGGCTTAGCAGCAGTTGAAAATGGCGAGGTTAGTATTGAAGATTTAGCTATGGCGATTAAAACTGCAAAAGCAGTTCCAATGTCTGCTGATACAGAGATGTTACATGTTTTACAAAGAGATTAT…
FTT0188	FLH156581.01X	FtCD00020999	AY774132	ftsZ	cell division protein	ATGTTTGATTTTAACGATTCAATGGTTTCAAATGCCATAATTAAAGTTGTCGGTGTTGGTGGCGGTGGCGGTAATGCTGTACAACATATGTGTGAAGAAGTTTCTGATGTTGAGTTTTTTGCCCTAAATACAGATGGTCAGGCATTATCAAAATCAAAAGTTCAAAATATATTACAAATTGGTACAAACCTAACAAAAGGTTTGGGTGCTGGTGCAAATCCTGAAATTGGTAAGAGAGCTGCAACTGAAGATAGAGCGAAAATCGAGCAACTTTTAGAGGGTGCTGATATGGTTTTCATCACTGCTGGTATGGGTGGTGGTACAGGTACAGGTGGAGCTCCTGTAGTTGCAGAAGTTGCAAAAGAGATGGGTATACTTACAGTAGCTGTAGTTACTAAG…
FTT0190c	FLH204804.01X	FtCD00022973	DQ681474	dnaX	DNA polymerase III, gamma/tau subunits	ATGTCATATCAAGCATTAGCAAGAAAATATCGTCCACAATCATTCGCAGAAGTTGCTGGACAACAACATGCTCTTAACAGTTTAGTACATGCTTTAGAAACTCAAAAAGTTCACCATGCCTACTTATTTACGGGTACGCGTGGGGTTGGTAAGACAACACTTGGTAGACTCTTAGCAAAATGTCTAAATTGTAAAACTGGTGTTACTGCTGAGCCTTGCAACAAATGTGAAAACTGTGTAGCAATCAATAATAACAGCTTTATAGATTTGATCGAGATTGATGCTGCTTCACGTACAGGTGTTGAAGAGACTAAAGAAATCTTATATAATATCCAATATATGCCTTCACAAGGACGCTATAAAGTCTATCTAATCGATGAGGTACATATGCTATCTAAG…
FTT0191	FLH156491.01X	FtCD00020983	AY774131	prfB	peptide chain release factor 2	ATGGAGCTAGAAGATGGTTCTATTTGGGATAATCCAGAGTATGCACAAAACTTGGGTAAACAAAAAGTAGAACTTGAGAACGTTGTACACAATTGTGAGTATATCTCAGAAACTCTAGAAACTTTAAGTGAACTGCTTGAGCTTGGTGAAGAAGATGAATCTTTAATGCAAGAAATTGCTAAAGATACACAAAATGTTGCTAGTGAAATTGAGAAGCTTGAGTTTCGTCGCATGTTTTCAGGTAAAATGGATGCTAATAACGCCTTTTTGGATATTCAGTCAGGTTCTGGAGGTACAGAGGCGCAAGATTGGGCAGAGATGCTGATGCGGATGTATATGCGTTGGGCAGATAGTCACGGCTTCAAGGTAACCGTTGATGATGTATCAGATGGTGATGTT…
FTT0192	FLH204810.01X	FtCD00022979	DQ681475	lysU	Lysyl-tRNA synthetase	ATGGGGCTACTAATTGCTAATGTGCAACAAATAATTACAGGGTTTAAAATGAGTAGTAAATTAAAAGATTTGATAAAAACAACGATAAAAGAATATTTAGAAGCTAATGATATCACAGTTAAAGATGCTATTAGAGGCAAGATTAGAGAGCAGATTAGTGAGTTTTTAGGCGAGGTAAGCGAGATAAATGAGCAGGTTAAAGAACAAATTTCAGCGCTTGTGAAAAAGCATGTAACAGAATTACAAGAAAGCTCACAAATTGCTTTAAGAAAAGAAAAGCTAAAAACTTTAGCTCAGCAAAATAATGGCATAAGCCATCCAAATAGTTTCCGAAGAAATGCTGTTGCTATAGAGTTACAGGCTCGCTATGCTGATAAGACTAAGCAAGAATTAGAAGAG…
FTT0193c	FLH231500.01X	FtCD00039381	DQ681476		conserved hypothetical membrane protein	ATGAGTAAATTTATAAACAAAATATTATCAATAATAGAAATGTTCATATTTGGGATTCGCTGGATTCAAGCACCAATTTATCTACTTTTATCACTAGTTCTATTTGGTTTTATCTATGAAATATATCATGAGTTATATCATCTATTTACTCATTACCATACTATTGATGAAGACCAACTTATTATAATAGCTCTAACACTATGTGATGTTGTACTAGTTGCAAACCTTGTAGTAATTGTAGTCATTAGTGGTTATGAAAACTTCGTAAGTAAAATGAACCTTGATAAAAAAAGTGGTGGCCAACCTGTTTGGATCAAAAAGTTATCTCCAAATGCAGTTAAACTAAAGATCGCTGGCTCAATTATAGGTATTTCTTCTATTTCTCTTTTAAAGAAGTTC…
FTT0194c	FLH156427.01X	FtCD00020975	AY774249		conserved hypothetical membrane protein	ATGATCAATTTCCTATTCATATACTTAGCGTATATCTTAGCTATTGTTTCGCTTTTATCTTTATGGATGATAAAGTTTAGAATATTTGGATATATTACAATTACAACATCTCTAGTATTTGCACTCCTATCAGGAGTATTAAACTTAACAGGTCTTTTAGTTATTTGCGTAATAGGTATTCTTATTTATTTGAGTTTTTATTTTAAAGATAAAAAAGGAGTTAGTTTATTTTTCTTTATTATTTCTGCAGTGATTCTATTTCTTAACTACATGCATTTTTTTCCTGGCTTTAATAACATATGTATAATTAAAAATGCTCAAATTTCACAAGATGCTATAGCTATTAGCTTATATTTAAACTATAGCTCTATTATACCAACATATTTTTTATTACTTTTT…
FTT0195c	FLH204794.01X	FtCD00022965	DQ681477		L-glutaminase	ATGAAAACAATAATGATTAAAACTACATCTTCTAGTGGTGAAGATTACTATAAAAATATTTTTAGCGCTATCTGTGACAAAGATGGCTTTATGACAAAGACAGATATTCTTGATATCTTAGTTGAGTCAGGTATTAGCAATGATGATCCTCGCATTACTAAATTAATCGCCAAATTAAATAAATTCTGTGATATTGATAAGATTGATTTTGATACATTTCAAGAAATTACTTTTGAAAATATAGGTCTTATCGAAAAAGCTATTAATAAAGGCTTTATCATTCCCAACTTTAAGGATTTCAAAAAAGAAATTGAAGCCATATATAACGAAACTAAAAAGAATGAAACAGGCAGAAACGCAAACTATATTCCTCAACTAGCAAGGGTTGACCCTAATCTT…
FTT0196c	FLH156530.01X	FtCD00020990	AY774254	glnA	glutamine synthetase	ATGAAAGTAATATCCGCTGAATACATATGGGTTGATGGTTCAGATCCTGTGCCTCATCTTAGATCTAAAGCAAGAGTTTTACCATTTAAAGAATTTGAAACTCCAGATGAATTTCCAGAATGGAGTTTTGATGGTTCTTCAACAAACCAAGCTACAGGAGATAACTCAGATTGTATTCTTAAACCTGTTAACTTTGTAATTGATCCACTAAGAGATTATGGTTACTTAGTATTATGTGAAGTTTATAATCCAGATGGACAAACTCCGCATGCGACAAATAATCGTGCCAAGCTAAGAGCTCTATTAGCTAGTGCTGACTGCCAAGATATGTGGGCAGGTTTCGAACAAGAGTATACAATGTTCAAAGATGGTAGACCACTTGGATGGCCTACTACAGGA…
FTT0197c	FLH204762.01X	FtCD00022945	DQ681478	holA	DNA polymerase III, delta subunit	ATGGAATTAAGTTATTTTGAGCTACTCCAAAAAAATGATCTCACCGCCTATAAACTTTTTATCATAACAGGTGATGAACCTCTACAAAAACACAATACTATTGAAAAAATAACTAATCAGTTTAAAACTAAAAATTTTGAAATAAGCTATCATGATTTAAGTGAACAAAATATAGATGTTTTGTATAACGAAGTTGATAGTCTTAGCCTATTCAGTATTGATAAATTTATTCAATTCAATTTTGATAAGCCCCCACAAAAAAAACTCCAACAAACATTAGTTGACAAGCTTATAAATGATGATGATAACGTTTACTTGCTTGTTTTTAGTGGTATGAAAAAGCAAAATACCTCAGCAAAGTGGTTTCAAAGCTTAGAGCATAAAGCTATTCATATTCGC…
FTT0198	FLH204767.01X	FtCD00022950	DQ681479	blc	outer membrane lipoprotein	ATGCTATCAGGTTGTGTAACCAAACCAGCAAATATAAATCCTGTCGAAAACTTTCAAGCGGATAAGTATCTTGGCAAATGGTATGAGATAGCAAGATTTGATAATAGTTTTGAAAAAGGTATGACAAATGTTTATGCTGAATATAGTTTAAATCCAGATGGAACTATAAAGGTAATAAATAGTGGCATCACACCATCAACTGGTAAGAGAAGTTATGCTACGGGAATTGCTAAGTTTGTTGAAGATAAAAATATTGGCTACCTTAAAGTATCTTTCTTTAGACCTTTCTATGGTGCGTATGTAGTATTTAAGCTTGATGATAATTATAAATATGCTTATGTGGCGGGTGCGGATAAGGATTATTTATGGCTACTTGCGCGAACAAAAACAGTACCACAA…
FTT0199	FLH156395.01X	FtCD00020972	AY774129		hypothetical protein	ATGAAAAAAACTTTAATCACTATGGTAATGTTAACAAGTGTAGGTGCGGCAACTAATGCTAGTGCAGAGGTTACTAATAAAAAGTTTCTAACAGCTACTGGAACTAATATTCAATATGGCGATGCATATTCTACTGATTCTGCTAGAATAGCAAAACTTACCTGTTTTGAGCCAGCTGTGCCACCTATGACTCAAGCACCAGTAGGAAAATTATCCTTCTCTCAATCAATGATTAAACAGGAGCTAGCTAAAGATCTAAATGTTGATATCAGTGCTAGCGGAGGATTTGGACTTTTTTCAGCGGATGCTTCAGCTACTTATGTAAACTCCCTAAAAGATGGCTCTACAGCTATGACTTTCTCCTATGTATATTCAATTACAGCTGAATCAGTCATAAAT…
FTT0200	FLH156608.01X	FtCD00021003	AY774247		hypothetical protein	ATGGAAATATCAATTACTTATGCAAAAGGAGAGTATCAGAATTCGTTAGATAATGCTTTTGCCAATAATGATCAATCTAAGCTTAAACTTTTACTTGGTGATAGAGATGACTATTTTGATTTACATTCTGTAATTGGTATAGAACCAGGAACTGATATTCCTGAAGTAAAAAATATAGATCAAATTAAGCAAGCTAGAGAAAGAATGGTTAGTGCATATCTTGCAAATAAATATTATGTTGATAAGGCTAATAAAATATTTAAAACATATCCAGTTACACTAGATGATTCTTATAAGATCGCACTAGGACAATTTATGGATAAGGCGCAAGCGAATGTTAATCTAATTCAAGAAAAAATAGTCAAAAATTGTTATAATAATTTACAAAATTGTCCTAGT…
FTT0202c	FLH204803.01X	FtCD00022972	DQ681480	isftu2	Transposase	ATGAATTATCATATAAAAGAAGTATTCTGGTCAATTATTTTATCATTCTTAAAATCACAAAAAGGTATACATACCAATGATGAAGCCAAATTAAGATTGTTTATTGAAGCTGTATTTTATGTGTTACGTACAGGCTGTCAATGGAGAATGTTACCATTTTATTATGGTAAATATAGATCAATACATAAGCGTTTTAAAGATTGGTGTGATAAAGATATATTTTCTAGATTATTTAAATCAGTACAAAACCCTGATTTACAAGAAGTCATGCTTGATTCAACAATAGCAAGAGCACATGCTTGTGCTACGGGATATGATAAAGATGATAACCAAGCAATTGGTAGATCAGTTGGTAGGATAACCACTAAAATCCATGCTATGACTGATGCTTTAGGTAAT…
FTT0203c	FLH204800.01X	FtCD00022970	DQ681481	purH	bifunctional purine biosynthesis protein	ATGTCAAAAATAAAAAGGGTACTAATATCTGTATCTGATAAAACAGGTATCATTGAATTTGCCAAAGAATTAAGTAAGTATAACATCGAAATACTTTCAACAGGTGGAACTTCAAAAACCCTTAAAGATGCTGGAATAAACGTAATAGATGTTTCAGAGCATACACAATTTCCAGAAATTATGAATGGTCGTGTAAAAACACTTCATCCACTAATTCATGGTGGTATCTTAGCCGATAGAGATAATCCTGAGCATCTCGATGCGATGCTAAAAAATCATATTGGACAAATAGATATGGTAGTCGTTAACTTATACCCTTTTGTCAATACAGTTAAATCCGGTGCTGATTTTGATACCTGTATCGAAAACATAGATATCGGCGGACCTTCTATGGTGAGA…
FTT0204	FLH204790.01X	FtCD00022963	DQ681482	purA	adenylosuccinate synthetase	ATGTCAAATATCGTAATCGTAGGCGCTCAGTGGGGCGATGAAGGTAAAGGTAAAATAGCAGATACTTTAGCTGAGAAAGCCGATTTGGTTGTTCGTTATCAAGGTGGTAATAACGCTGGTCATACATTGGTTGTAAATGGTAAGAAGACATTTCTTCATTTAATACCTTCAGGTGTTTTGCGTCAGCATACAAAATGTGTAATTGGTCATGGCGTGGTTTTAGATCCTGTTGCCTTAGATGAGGAAATTACACGTCTACAAGCAAAAGGTATAGCAATTTCAGCAGAGAATTTATTTGTTTCTGAGTCTTGTACGATTATTACTTCTTATCATAAACTTTTAGATGCAGTTAGAGAAAGTAACACTAGTGAGAAAATAGGTACGACTGGTAAAGGTATT…
FTT0205	FLH154479.01X	FtCD00020757	DQ681483	hpt	Hypoxanthine-guanine phosphoribosyltransferase	ATGACTTATTCTGCAGAAAATACTGAAGTTTATATAACAAGCCAACAACTTGAACAAGCTGTTACTAGATTAGCTGAACAAATTAATCAAGACTATTCAGGACAGCAAGTTACACTTGTGTGTGTTTTAAAAGGCTCTTTTATGTTCTTTGCTGATCTTGTGAGGAAGTTACGAATTGATCTAAGGACACAGTTTATTACAGCATCATCGTATGGTTCTAGTACTAAGAGTTCTGGGACAGTGACTCTAACAGAAACATCGTTAAAAGAAGAGTATGTTAAAGATAAGAATATCATAATAATTGAAGATATAGTTGATACTGGACATACTTACCATAAGCTTATCGAGGGGATTGGTAAATATAATCCAAAAACTCTAAAGTTTGCAACTTTGTTATTT…
FTT0207c	FLH231491.01X	FtCD00039377	DQ681484		permease of ABC transporter	ATGGTCAATGCCATTATTGCAATGAGCTACCTTGTTTACAGGAGGATATTTGTGTTTAGTTATACCTTTATGCTATATGCTTTTATAGCAGGAACAATAATAGCGATTATCTGTGGCATTATTAGCTTTTTTGTCATAATTAGAAGATTATCATTTGCTTCACATGCTTTAGGACATATTAGTCTGACAGGAGCATCAGGTGCTGTGCTGCTTAATCTATCAGCGATGTCTGGGCAACTTGCTATAAATCTTATTGCTGGATTACTTATGGGTGCTTTTGGTGATAAGATTAAGAAAAATGATATTGCCATCGGTATTGTCCTAACTTTTTTCCTAGGTTTAGGAACTTACTTTTTATTCTTATATCAAAGTGGCTATTCTGGATCTGTAATGTCTATC…
FTT0208c	FLH204791.01X	FtCD00022964	DQ681485		ABC transporter, ATP-binding protein	ATGATTAAATGCTCTAACTTGGTGATTGGCTATAATAAACCAATCACAGCTGCGCTAAACCTAGAGGTACCAACAAATGCATGGGTTGGTATCGTTGGTAAAAATGGTGTTGGTAAATCAACTTTTTTTAAGACCCTCTTAGGTAAAATACCAACTATTTCTGGTTTAATAACTATTAATGATAATAAAATAGATGTCGATACTATTAGTTATATTCCTCAAGAGCGAGAAATAAACTTTGAAGAGAAAACCTCAGGCTATACTCTTGTTAAATATAGTTATAAACCAAAGTCATGGGGACTACCATTATTTGATAAAGAATTTAAGGAAAAACTAGAATATCTTATCGCACTAACACAAACACAAGATTATATCCATAAGCCTTTTAAAAACCTTTCT…
FTT0209c	FLH154404.01X	FtCD00020751	AY774022		periplasmic solute binding family protein	ATGAAAAAATACATACTAATAGCTTTAGCTGCTGTTGTTATTGTAGCTTTGGTAGCTATCAACCTTTTGGCTGAAAGTGATAAGCCCCAAACAACAAAAGGCAGTCATGACATCTCTGTTGTAGCTGCGGAAAACCAGTATGGCAGTATCGCTAAGCTTATTGGTGGTAGTAATGTTAAAGTTACTAATATAATCGATAATGCTGATGGTGATCCACATACTTTTGTCTCTTCTGTGAAAAATGCTAAGCTTTTAGCCGAAGCAGATGTAATTATCTATAATGGTGCTGATTATGACTCATGGATTACGCCTATACTAAAGACTAATAAAAATGCCGAAATCATTAAGGTACAAGACCTGATAAACTATCCACAAACCGAAAAACTTGGCATTAATCCA…
FTT0211c	FLH154447.01X	FtCD00020755	AY773994		outer membrane lipoprotein	ATGAAGAAGGTTTTTTGGATTTGGCTATTATCATTATGCTTCTTATTAACAAACTGTACTAATTCCGCACCAAGCTATTCAGCTAATTCTGTAGGTCAGGTATCTCAAGTTGAACAAGGTCAAATTATCGATATCCAACAAGTCAATATCAAAGGCTCTGATAATATCGGTGCAAGAGGTGGTGGCTTAGCTGGTGGTCTTGGCGGAGCTTTAGCAGGAAGTGGTAATATTTTTACAAGTATCGCAGGCTCAATAGGTGGCGCAATAGTAGGAGGAATTGCTGGTGGGGCAACAGAAGATGCTATAACATCATCAAAAGACTATCAGTTTACACTAAAACTTGATAACGGAAAAACCATAGCTATACTCCAAGAAGATAAGCATGGTCTTAATATTGGT…
FTT0212c	FLH204783.01X	FtCD00022957	DQ681487	wrbA	trp repressor binding protein	ATGATGATGAAAAACATACTAATACTATACTACAGCCAAGGTGGAAGTACAAAGAAAATGGCACATACTATAGCCATTGGAGTTGAAGCCACAGGAGCAACAGCAACTATCCGTACGGTACCAAATATTTCAGCGAAAACTGAACAAACAGCGCCTTTAATCCCAGATAATGGCGATCTGTATGCAACAAAAGAAGATTTAGCTAATTGTGATGGTCTAATAGTCGGAAGCCCGGCATATTTTGGTAATATGGCATCGCCACTTAAGTACTTTTTAGAGATACATAGTGATATATGGTTTAAAGGTAGCTTAATCGGTAAGCCAGTAGGTTTTTTCACTGCTGCATCAGGAATGCATGCCGGTCATGAAAGCACCTTATTATCAATGATGATCCCTTTT…
FTT0213	FLH204784.01X	FtCD00022958	DQ681488	rbn	tRNA processing ribonuclease BN	ATGTTTGATATCAGATTATACAAAAAATATTTGCTAATATTAAAAAACTATTGGATCTGGGTTTTTAAAGAATATCTCCGTAAAGACTGTCCAACAGTAGCTGCTTCAATAACTCTTACGAGTTTGTTTGCTATCGTACCAGCTTTTTTCATTATAATAAATATTTTAGATGCTTTTAGTTCGCTTTCTGAGAGTCTACAAAATTTTCTTTTTGAAAACATGCTTCCAGAAACAGCAACAACTGTGCAGCAGTATATCACAAAGATTTCTCATAAAATGACTTCCTTACCTATTACATCAGTTATAGTCTTACTTGTGGTAATCTTTTTGATGATAAAAAGGTTAGAAATTACCCTAAATAAAATCTTTTATGCAAATAGGCAACGTCCAATACTTCAA…
FTT0215	FLH230051.01X	FtCD00039281	DQ681489	priA	Primosomal protein N'	ATGATTGTCAAGGTAGCTTTACCAGTACCACCTAGTTATGTACTTGACTATAGTGTTGATTGTCAAAATGTAGAGCTATTCGAGCGTGTCTTAGTTCAGGTCGGAAAGCGTCAGCTAATAGGTTTTATTGTAGCAAAAGATGTAAAGATTGGTTATGAAGCTGAAAAGCTTAAAACTATTATAAGAATTCTTGATAAACCGATTAGTCTAGCAATACAAAAACTAATATCATGGCTATCACAATATTATTGCTGTGATATATACAGTGCAATACGTTTAGCACTACCAAATGACTTTCTCAAGCTACAAGAGGTTAAACCACAGCAGGATACATATGTATATATTGATAAAGTAAGGTTGCAACAACATAAACTAACAGCAAAGCAGCAAGATTTAATA…
FTT0219c	FLH154832.01X	FtCD00020798	AY774076		phosphate transport protein	ATGATTTCATCAGTGCTTATAGCCATTATTGTAATAGCATTGTTTTTTGAGTTTACAAATGGTTTTCATGATGCGGCAAATGTTGTTGCAACACCTATTGCAACTAAATCACTAACTCCATATCAGGCAATAGCTTTAGCAGCATTTTTTAACTTTTTAGGTGCATTTTTTGGTACAGCAGTTGCTGCAACAATATCAAAAGGACTTGTAGATACTAATGTGGTTACAGATATTGTTTTGATTTCTGCGTTACTTGGAGCGATAAGTTGGAACTTTTTTACTTGGAGCTTTGGGATTCCTTCAAGCTCATCACATGCTTTGATAGGTTCTTTAGTTGGCGCAGTGATTATCAGCTCAAGCTATCAGAATGTAAGCTATATGACGGTAGTTAATAAAGTT…
FTT0220c	FLH154654.01X	FtCD00020777	AY774078		hypothetical protein	ATGCTGCGTAGGCTGGTTAAAAAATTGATTCCGAGTCAAGATAAAATCTTTTTTGATTTAATGATAGAAGCAACAGAGGCTGTTGAAGACTCGGCTAGAATTCTTGATAAATTAGTCAAAGAAGAAGATAATTTAACTATTTCTGAATTATCTGAAGAACTAAGATTAACAAGAACAGTAACAGTTGAAGTAGCTAATAAAATCGATCATGAATTAGCTCGCTACTTTGTAACACCTGTTGATAGAGTAGAGATACATAATATCACTACTTTGCTTTTAAAATTAAATCGAAGAATTGTTAAGATTCATCGATATATGCAGATCTTGATGGAAGAAGAGCGTGGCAATGTAAATATATACTTGGCTAATAGTGTTGAAACACTACGTAAAATGACAAAA…
FTT0221	FLH204798.01X	FtCD00022968	DQ681491	acpA	acid phosphatase (precursor)	ATGAAGCTCAATAAAATTACTTTAGGAATTTTAAGTCTAAGTATCGCAACAACGACTTTTGCCACAGATGTGAATAATAGCAAACCAAATGATTATGGAACTCTTGTAAAAATAAAACAAAAATTATTTAATAATGCGAATACTCTAAAAACTACAACTCCAATAAAGCACGTAGTAATAATATTCCAAGAGAATAACTCTTTTGATAGATACTTTGGAATGTACCCCAATGCCAAAAACCCAGAGGGTGAGCCAAAATTTGTAGCCAAAGAAAATACTCCAAATGTTAATGGTCTGACAAAACAATTATTAGAGAATAATCCAAATACAAAAAATCCTTATCGTTTAGATAGAAATTTCCAACCTTGCTCACAAAATCATGAGTACCATCAAGAAATT…
FTT0222c	FLH204809.01X	FtCD00022978	DQ681492	ybgK	hydrolase subunit	ATGCTGTTTCGCTACGTCAATATGGCTTTACAAGATAAGGGGATATCACCTCAAGGAGCGCAAGATCAGCTTAGTTTTATTACAGCGTATAATCTTGTTGGTAAACCTACTAATTTCCAAGCTGTAGAAATGATCTATCCAGCAGAAATTACAGCTAACCAAGATGCTTTAGTTTGCCTATCTGGAGCTAGCTATCAAGATACTTATATAGATGCCCATAAAAAAGTCAGCTATAACCAAGTTTTCATGCTTAACAAAGGACAGAAATTAGAGTTTAAAGGAATAAAGAAAGGTTTTCGTACAGTAGTTTTAGCAGTTAAAGCAGAGTCTGAAATACAAGACTTAGTAGCTAATACAAGATCACCACAGCTTGCAAGTTATATAAGCGAGACTTACCGC…
FTT0223c	FLH154686.01X	FtCD00020783	DQ681493	ybgL	lactam utilization protein	ATGCTTTTAATAAATTGTGATTTAGGAGAGCGGGGTGTTGCTCATCCTATTGATGATAGGCTTGTTGACTACATTGACATAGCAAATATAGCTTGTGGAGGTCATGCGGGAGATAAGGCAAGTGTTGATTACTATGTAAATCTTTGTAAAGGGAAAAATGTCAAAATTACGGCGCATATATCTTATCCAGATAAGCAAAATTTTGGTAGAAAAGTGATTGATATTGATCATAATGTTTTATGTGAGTCTTTTGATCAACAATTTGCATTATTTGATAGTGAGATTAAAGCCATAAAGCCACACGGAGTTTTATATAATCAGTTAAATGTCGATCAAGAACTAGCAAAAACTTTCATACAATGGTGTATTAAAAATAATATAGATGAGCTGCTTGTTAGC…
FTT0227c	FLH154642.01X	FtCD00020774	DQ681494		hypothetical protein	ATGATTGCTAGCTTATTAGTCTCTAGCTGTACAATTCACCCTCTTGGAATACCTGATGAAACATGGCAAAAAATGACTCCTCAACAACAAGCTGACGCATATCAAAAACAAGCCGATATTGATGCTAAACAAAGAGCCCAAGAGTTAGCTTATATAGTTAATCCGAAACATATTTGTAGAAAAAGATATTTGTAG
FTT0228c	FLH154599.01X	FtCD00020772	DQ681495	orn	Oligoribonuclease	ATGCAATCAGCAGACAACCTAATCTGGATTGACCTTGAAATGACAGGTCTTGATGTCGATAGTTGCAAAATTACCGAAATAGCTGCAATTATTACTGATAAAGATCTAAATATAATCGCTGAAGCAGAGCCAATTGCAATCTATCAGCCTGATGAAGTTTTAGCCAATATGAATGAATGGTGTATAAAAACTCATACTGAAACAGGACTTACACAAAGAGTCAAAGATAGTAAAATCTCTACAGAAGCTGCCGAGCAACAAATTTTAGAATTTATAAGAAAGTTTGTCCCATACCAAAGTTCTCCTTTATGTGGTAATTCAATTTGGCAAGATAGAAGATTCCTTGCAAAGTATATGCCAAACATAGATGAATACTGTCACTATAGAATGCTAGATGTC…
FTT0229c	FLH154606.01X	FtCD00020773	AY774053	efp	elongation factor P	ATGGCTAGTTATAGTACTAATGAGTTTAAAGGCGGCTTAAAAGTTTTAATTGATGGTAACCCAATGGTTATCGTTGAGAATGAGTTTGTAAAACCAGGTAAAGGACAAGCATTTAATAGAGTTAAGCTAAAAAACTTGCTTAATGACAGAGTAGTTGAAAAAACTTTTAAATCTGGTGAATCTGTTGAAGCAGCAGATGTAGAAGAACTAACAACTGTATATTCATATTTTGATGGTGATAGCTATGTATTTATGCACCCTGAAACATTTGAACAATATATGGTTTCTGAAGAAGCTCTTGGTGAAACAAAAAAATGGCTTAAAGATCAGGATGAATATCAAGTAATCCTTTTTAATGGTCAGCCTATTTCTATTATTGCGGCGAACTTTGTAAACCTT…
FTT0230c	FLH154820.01X	FtCD00020797	AY774067		Type IV pili fiber building block protein	ATGTTGGATAAAAAAGGTTTTTCTTTAGTTGAGTTAATAGTGGTAATAGCAATTATAGCTATTCTTGCATCTATAGGTATACCTATGTATAACAACTACATACTTAGAAATCATCGAACTGAAGCAACTTCTGAGCTGCTTTCAGCAGCCAGTGCGGCTGATAATTACGAAATCCGTTTTGGCTCATTTCCTTCAGGAAGTAATATCGATAGTTTTTATCATACAAATACACAAAATAGCTATTATAGCCTAGCGTACTGCTCTGGAGAACATCAGTGCCCTAATGTAAGCTATGTAATAACTGCTACAGCACAAGGTACCCAAACAGCTGATACGCCGTGTGCAAATATAGAGATTGAAGTTAAAGGTGGAATAGTAAACAAGACTCCTGCTGAATGC…
FTT0231c	FLH154808.01X	FtCD00020796	AY774064	htrB	Acyltransferase	ATGAATAATAACAAGTTTAGTCCTAAAAACTGGGGTATCTGGATTGTCGTTGGTATAATGAACTGCGGCTCGAAGCTACCTTTATTTACACATAAATATATAGTTTTAACTATTGGTCTTATTATTAAACCTTTTTTAAAAAGTCGTAATGATATCGCTTATGAGAACCTTAAGATAGCTTTTCCTGAGAAATCTAACAAAGAAATAAAAAAACTAGTCAAAAAAAGTTATTATTCAATGGTGTTATCTGGAGCTGAAACAACCGCCGCATGGTTTCTCTCTAAAAAAAGATTTAATAAAATTGAGTTTAAATGGGAAGAAGGCTCTAGGGAAAGATTCGAAAAATATCATAATGATCCTGATAAAAAACTAATTATCTTAGGTTTTCACTTTCATTGT…
FTT0232c	FLH154788.01X	FtCD00020794	AY774051	ddg	Acyltransferase	ATGGATAAATCTCTACTTAAACCAAAATATTGGGGTATATGGATTATAATTTGGATCGCCAAGTTTATAGTAAATATACTTCCATACAAAATGCTAATGCGTCTTGCAATAGGCATTGGTTTTTTAGCAAAGCCTCTACTCAAAAAACGTCAACAAATAGCAATTACCAATCTTAAGATCGCATTCCCTGAAAAATCAGATCAAGAAATAAAAAAACTAGCCGATGCTAGTTATAAATCAGCTAGTATGGCTGGTTTTGAAAGTCTAATTTCTTGGTTCATGACTAAAAAGAACTTCAACAAAATTCCTTTTGATAACGATCTAAGATCATTTGATGAAATTCATTATGACAAAGACAAAACTCTACTAGTATTAGGTTTTCACTTTCATTGCCTTGAG…
FTT0233c	FLH204806.01X	FtCD00022975	DQ681496	yidC	Inner-membrane protein	ATGAAAGCTAATCATATAAGAATATTACTGTTAGTCACAATAGCAATAATGTTTATCTCGTTGATGGGAAAATGGGAGCAAACATTCCCTGCTGACAATACTAAACAGCAAACATCAGCCACACAAAATAATAGTCACTACGACAATGCAGATTCAAGCACAAATACTGATGTAACTACAACTGATGCAAAAAGCTCTTTAGCTAAAGAGACTAATTTTTCTAAGTATGATAATGCTAAAAGTATCACAATTAATACTGGAGTTTTTAAAGATGTAAAAGTTAGTCTACTAGATGGTGCAATTATATCAGCATCTTTAAAAGACTACAGTATCAGTCTTGATGATAAGACTCCGATGAGTCTACTTACAGATAAATCAGGTTCTGAATATATTGCTAAG…
FTT0234c	FLH231486.01X	FtCD00039375	DQ681497		hypothetical protein	ATGCTAATCAACCTCTATCGCTACTGTATCAGCCCTTTTATACCTGCTAGATGTAGATATTATCCAACTTGTTCAGAATATGCTCTAGAAGCTCTCAAAACTCATGGTATACTAAAGGGATTGTACTTAACTACACGTAGACTCTTGAGGTGTCATCCACTCTCAAAAAGAGATTACTACGACCTGGTTCCTTGTAAAAATAAAAAAGGTTAG
FTT0745c	FLH204558.01X	FtCD00022817	DQ681498		hypothetical protein	ATGATTAAAAAAGTTATTAAAAAAATCAACAGTTTAGTTTATAGTTATCAAAAGTTGCTCTATAACTCTAACAATATTAACGATACAGAATCATCCTACACCTTCATAAATTACACAAATCCAGCTATTACTATTATTGCTATTTCTAGGACGATTCTTCTATTACTGTGTATGTATTTAGTTTGGATACACGTTAATGGTAACTCAAGTATACTAATGATGATGATATATCCATGTCTGTTATCACAATTATTTACTGCAGTTCCAAATCCAGCCGATATGATAAGAAATGTCGTAGTTGGTCTATTTCTGTCAATACCTATTAGTATCTTTATAACCTTGAATCTATTATCATAG
FTT0746c	FLH153038.01X	FtCD00020599	DQ681499		conserved hypothetical membrane protein	ATGATAGATGATATACCTACGATCTTTAATACACAAAATGCTATACATACATTTAAGGCATGTATAGCTATTACTCTAGCACTTGGAATATCAATGAGTCTAGACTTAGACAAACCAATGTGGGCAATGATTGCAGCACTATTTCTACAAACTCGTCCTGAAACTGGTTTTATAATAGAAAAAGCTTTGGTTCTAATCTGCGGATCAATTATTGGAGTAGGTGTTGGCTTTTTGATAGTAAATTTTTTCTTGCCTTATCCAGTACTAGCTTTATTAGCTTTATGTCTTTTTATAGCTGTAACAATGTTTTTCTCTGCTAATATGTCTTACCCAAACTTTATGTATGCATTAGCTATAGCAAATACAACTTGTAATATCGTTGTTTTTTATGCTATTGCT…
FTT0747c	FLH204620.01X	FtCD00022856	DQ681500		hypothetical protein	ATGGGGATTAATATGTCAAACAAAAATACTAAATCTATAATCAGTATAATAATTATTTTATTTGCTCTTTTTTCACTGTATGCAATGTGGCAATATTATCTTTATTCACCTTGGACAAGAGATGGTAGAATCCGCGCAAAAATTATCACAATAGCACCTGATGTATCAAATATGTACGTCAGTGATAACCAAAAAGTTAAAAAAGGACAGCTAATTTTCACAATAGATGACCAAAGATATGCTGCAACTCTAGAAGGTAAAGAAGCGGAATTAAAACATGCCATGATCGAATGGCAGCTTGCAGAAAAGCAGTATTTAAGAAGAATTAGACTAGGCAGAGATGACTCAATAAGTAGAGAAGAGCTAGATGATTATGCAATGCAAGAAAAACTAAGAAAA…
FTT0748	FLH204606.01X	FtCD00022850	DQ681501		hypothetical protein	ATGAGTGAAGACAAAAGAATTCAAGTAATAAGTAGAGCTGTTAATGTATTGAAAAGTATAGGTGGTAAACCAGATGGTATGAGTCTAGGTGAGATTGCTAAACAGATATATTTACCGCGCTCTACAGTACAAAGAATAGTAGCTGCTTTGGAAGAGGAAGGTTTTATAAAAAGCGAGGGAGCCGGAAAAATATTACTCGGTCCAGGAATCTTTAAGTTAATTTCTTCCAGCTACGCTGACATTATATCATTAACACAAGATTCATTAAGTAAACTTAGTGCAAAAATACAGGAGACAGTAGTAATAACTCAGCCTTATGATTCAGATCTGCTGATAGTACATAGATTTATTATAAATAGAGAATTGCAAGTACTTCCAAGGGTTGGTGCATTGATACCT…
FTT0749c	FLH204561.01X	FtCD00039248	DQ681502		hypothetical protein	ATGTTTAAAAATAACAATATAATGAGTTTTTTTATAATAATCGTATTGATAATAACCGGAATATTTTTATATATAAAGAATAAAGCTAATAACCAATATCAAATACTTCCTGATAACAGTGGATCTAGCTTAACCGATACCTCTTGGATTAAAAACAAATATCTAAATATACCTTATGCTTCATCATCAAATGCGCAAAAACTAGATATTTATTTACCTAATGATAAAAGTTTTGCTAAACCGTATCCTGTTATAATTGCTATACATGGTGGCGCATTCTTAGGTGGTGATAAGGCTGACTATCAACTAAAGCCTATGCTTGAGGGCATTAAACATGGTTATGCTGTAGTTTCAGTAAATTATCGCTTAGCTAACGAGGCAAAATTTCCAGCTCAAATC…
FTT0750	FLH231439.01X	FtCD00039352	DQ681503		hypothetical protein	ATGTCTACTAATGATTGGAAAAAAGTACTTAAAGAATCTTTCTCTTCACCTTTAGAATTATTAGAGTTTTTGGAAATAGATAGTGAAGAAGCCAAAGTTTCATTAAATATAGCCAAGAAGTTTAAAATGATAGTGCCTAGATCATTTGCTGATAGAATGCAAAAAGGTAATATCAACGATCCTTTGCTCAAACAAGTTTTGCCAACTGCCGATGAGGAAGTGATAGATCAAGCCTATAGTAGCGATCCACTTGATGAAAAAAACTATAATAAAGTTCCTGGGTTACTACACAAATATCATGGTAGAGTTCTGCTGATAGCACAAACAAGCTGTGCGGTGCATTGTCGCTATTGTTTTCGTAAAGAGTTTGACTATAAAGAAAATATCCCCGGTAGAAAA…
FTT0751c	FLH153042.01X	FtCD00020600	AY774350	cspA	cold shock protein	ATGAGACAAGGTACAGTTAAATTTTTTAATACATCTAAAGGATTCGGATTCATAGAGCCTCAAGATGGTGGTAAAGATGTATTCGTTCATATCAGTGCAGTTGAAAATGCTGGTTTAAGCTCTCTACGTGAAGGCGAAAAAGTAAGCTTTGAAGTTGAAGAAAACAGAGGCAAAATGGCTGCTGTTAATATAAAATCTATCTAG
FTT0752c	FLH153018.01X	FtCD00020596	AY774586		hypothetical protein	ATGAGTATATTAAATACTGAAATTATGGAGCAGTTTATCAATTTAATAAACCATATGACAGATAGAGATTTTAATGATAATAAAGAATCATCGATGGTAGAAAGTTGTTTAGATTTTCAAGATTTATGCCTATACCTAAAAGATATAGATAAATATGAAGAAGATTTTGATTTAACTAAAATACCTAATTTTCATTAG
FTT0753	FLH153026.01X	FtCD00020598	AY774592	rpsU2	30S ribosomal protein S21	ATGCCAAGAATGATAGTTGACCCTAAAAAACCTTTTGATATTAGTCTAAGAAATTTCAAAAGGGCTTGTGAAAAAGCAGGTATCAAACAAGAACTTAGAGATAGACAGCATTACGTAAAACCAACACAGAAGAGAAAAATAGCTAAAAAAGCTGCTATTAGTAAGGCTAAAAAAGAAGCAAGAAGGTCTTATTCTTATTAG
FTT0754c	FLH231432.01X	FtCD00039349	DQ681504		hypothetical membrane protein	ATGTCAATGAAACAAAAATTTATTATTTATTTACCAGCTTTATTTATAATTTGTTTTATCACTACAATATTATCTACAAATGTAGAAGTATCTCATCTTACAGCTTTTACAACTTGTTTTTTAAGTATTTTAAGTGCTGGTTTTGTACTAACACTTTTGATAATACTAAGAGATTATTAG
FTT0755	FLH153247.01X	FtCD00020625	AY774359		hypothetical membrane protein	ATGATGATAGATTCTTTAGCAAGAAATCAAAATTGGGCAAAAGTAGCGCCATGGGCTGGGATATTTTTTACAGTATTATTATTTGCTAATTTTTTTGTATATGATCCACATTTTTGGGGATTAATTAATATTCCTTTGTATTTATTTCACCAGACAGAAGAGCACTATGTGCCTGGTGGCTTCAAAGATTTCATGAATCGTACAGTTATGGCACTACCACAAGGTCAGGAGAAGCTTACAGATATTAAAATCTTTTGGATAAATATCCTTATGGTATGGCTAGCATTTGCTGTCTTTGGTGCCTTGAGCTTTAAGCATAAAAGTTGGAATCTTGGTTTAGTAATGGCATCTATACAATTTGTGATATCTCTATTTGCTGCATATTATGTTACTGTTCAT…
FTT1069c	FLH204362.01X	FtCD00022703	DQ681505		hypothetical protein	ATGACTATAGAAAACATCATAGAAAATTTAAATATCCCAACTAGTAGAATATCAAAGCGTATACCAAAAAATAGTTTTGAAACTAACACAAAGCTAACTTCAGCTGAGAAAAAGTATTTAGCAAATGATGTAAAGTTAATAACTTTAGAATACTCTCTAGTTCAACAAAACATCCAAGTACCAGCTATCTTAGATGATGAATATAACTATAGTGCTATAAATATAATATCAGTTCAGCTAAATAGTGTTAGAAATTTTAAAAAGATTGCTAGTGTTATAAATAAGAGTATTCCAACAGCAAATTTACTAGTTTTTTATCTAGATGATGAGCAAATACCTATATGTTTATTACATACTCAAACTAAGAGAATTAACCAAGCTGATAAGTCAAAGATGGTG…
FTT1071c	FLH150968.01X	FtCD00020413	AY774837		hypothetical protein	ATGACAACAAACTACGAGCCTAAAATTCACATCGCATGTTTAGCAAGCTATAACAATGGTTTTTTATACGGTAAATGGATTGACGCAAACCAAGATGTTTCTGCTTTAGAAGAAGAAATCCAAGAGATTTTAGCAGATTCACCTATGCCAGATGCTGAAGAATGGGCAATACATGACTATGAAGATTTTGATAATCTGGGTTTGTCAGAGTATGAAAGTTTAGAAACTATTTCTCAAGTAGCTCAAAACATAGTAGAGCATGACGAGCTTTTTATAGAAGCTTATAGATATACAAACAATATTGATGAAGCTATCGAAATGATAAACGATCGTTTCATAGGCTTATATGACTCAGTTGAAGATTATGCAGAAGAAACTACTGATATTTCATCAATTCCA…
FTT1072	FLH231393.01X	FtCD00039330	DQ681506		hypothetical protein	ATGATAAATAAAAATGAAGGATATGGAAATGCTCTTGTAGAAGTGATTAAATCTGATTCTGTAATCGAGCTAAGTACAGATTATTTAGAACTTGGAGCAAGTATGTTAACAGATATTCCTTTAGTCAAAACGGTGATGGGAATATTTAAAGTCACTAGCACTATAAGAGATCAAATTTTATATGTCAAAATCACGCGTTTTTTAAGTCAACTCGCAGATATTCCAATTGAAGAAAGAAAAGATATGGTAGATGAGCTAAATTCATCTGATAAATTTGCTAATAAGCTAGGAGAAGCATTAATCGAAATAATAGATAAGCTAGAAAGCTCAAAAAAACCTGAACTAGTTGCTAAATGCTTTATTGCTTTTGCGAGTAAAAAAATTTCTTATGTAGAACTT…
FTT1073c	FLH152725.01X	FtCD00020559	AY774539		hypothetical protein	ATGGCAGAATCTAATCATTTTGATAGAAGAGGTTTTGAGATAAGCAAGCTTAAACATAGTCAACTGTTACATAAGTTTCTTTGTCAGCAGATACACTTACAAGTAATCAAACAAAACCATAAATATATCAGTGGTAGATGGTTAACTGATGAATGGTTTGGTGGCAAAAATGTTAAAAGACCTGATGCAATTATCATTACACAGGATAATCAGAAAATAGCTATAGAAGCTGAGCGAACAATAAAGAGTAAATATCGCTATCAGCAGATAATAGTTCAATATCTGAAAATGATAAAAGCTAATCAAATATCTAAAGTTAGATATTTAATGCCAGATCAAGCTAAAGCTCAATTGGTTGAAAAAAATCTATAG
FTT1075	FLH204367.01X	FtCD00022708	DQ681507		transcriptional regulator	ATGCAAAAAAACATATTTAATACTAAAGACTTAGGTTTATTAATTAGGAAAGCTAGAAAAAAACAAGGGTTAACTCAAGCTGATCTTTCTGGTATTTCTGGGCTAGGAACTAGATTTATAGGCGAAGTCGAAAATGGTAAAAATACGGCTCATATCGGAAAGGTTATACAACTTGCTAGTAGTTTAGGCTTGGTAATTTCTGTTGGCTGTGATTGGATGGAGGACTAG
FTT1076	FLH204404.01X	FtCD00022731	DQ681508	hipA	transcription regulator	ATGGATGGAGGACTGATAATGTCTAACCAACTAAATGTCCATTTGAAAGACATACATATTGGATATCTAAAAAAACAAGGTTCAAAACTAAGCTTTAACTATTCAAAAGAATATTTAGATTCAGAGAATGCTCAGCCTATATCCATAAGTATTCCTTTATCTGAAAACGAGTATAAGCATGATGTAGTTCACCCATTTTTTTCTGGATTACTGCCTGATGAGCCGGCTAGATCAAGATTAGCAAAATATTTACATATCTCTAATAAGAATACTTTTGAGCTTCTCAAAGCTATTGGTGGCGAGTGTGCTGGTGCTATATCAGTATATGATGGACAACCATCAGTTGATAATAACACAGAGAATGATTATCGTATTTTAAAAGATGACGAAGCTTATAGG…
FTT1077c	FLH150888.01X	FtCD00020406	AY774844		hypothetical protein	ATGGATTTTGCGGAGTATAAATTCTATAGTAAATTTGAAGAAGTACTTCAATCATCACAAGATTTACAGAACTCAATCAATGTAGCAGGTCAAGGAGCATTAAGAAGTTTACATGAGTCAGCTAGTCAGTCGCCTAAACTTAATGAGTTACTCAAAGATTTATATTCAGGTAATAAAGAGATCACAGATGCACAAGCACATCAAGTGCTATTAGAATGGGCAAAGACTTTGGTTAATTTTGAGACATCATTAGATTTATTAGATGGTTTTACCCTAGATGATGGAACACAGATAAATGTTGGCTTATCAGATAGAGTTAGAAATGTAATTGAGAAGACAGCAATACTTGAGGCATTAAATAGAAAGGCCCATTATACAAGTTATTAG
FTT1078c	FLH150759.01X	FtCD00020391	AY774825		hypothetical protein	ATGTATTTAGGTACAGCAGTAGCTATAAATGTTGCAACAACAATGTATGATTCTTATCAACAAAGTGATGGAAGTCTTGAGGACTTTTCTAATATTTATACTCAAAAAGTAAATGAAATAGAAATGAATGGTGTTGGTGATTATATCATTGGGGCTTTTACAGGTGATACATGGGTAAAAGCAGCAGCTGATGTTGGACAATGGCTAGGTGGAGTAGCTTATGATTGGACTCCTGATTTTATTAAAGAAATAATGTTTGAATCTTCCCAATCCGGCAACCAAGAAACCCTACGAGTAATCCGCCGCGACCTTCTGACATTAGACTTAGATGGAGATGGAATAGAGACAGTGTCGGCTGATGGTTCTGTGCTGTTTGACAGTAATGCAGATGGAGTTAAG…
FTT1079c	FLH150810.01X	FtCD00020398	AY774853		hypothetical protein	ATGAGTGATACAAGCACGGATTTACAAAATGGATTTGATTTTGCTGGATTAGCAGCATCTATGGCATTAGCTGCGAAAAATAATGAATTCCCAATGGCAACAGCAGCTTTTATAGGTATGCTAAATGAGCCTGTAAAAGCATATAACTCAGCGAAAGCTTTTTCGACTGGAGCTAAAAGTTTTGACTCAATAGTATTTGGTATGGATTTGGGCTTAGTTCAAGGTGAAGCTATTGCTCAGGCGATGATACAAGAGGTATAG
FTT1763c	FLH151428.01X	FtCD00020448	AY774918		Acetyltransferase protein	ATGAAATCTTTTCTTAAAAAGATTTGGAATATTTTAATGTGGTTAAGGATGACAGCATTTCAGCTTTACTCTTTTGCAGTAATTGGTGGCTGTAGTATCCTGATAAATATTTTTGCTTTTTTTAAATTGCCTTTATCATGGAGAATGGCTGTTTGCTATGTATGGACTTATCTTTATTGGATAGGTATGTTAGTCTTTTTACAAGTTTTTATTCGTATAACAGGTCGTGTAAATATAGATAAAGATTATCCATGCATCTATGTTTCTAAGCACCAGTCTATGCTTGAGACTTTTATGTTTTATGGTTTGCTTGGTAAATGTCATTTTATTATGAAGCAAGAACTTTTTGATGCCCCAATTTTTGGTCCTGCTATGAAAAACTTAGGTAGTATTGCTATA…
FTT1764c	FLH154722.01X	FtCD00020785	AY774063		Ferredoxin	ATGCCATTTGTAGTTACTGAAAGTTGTATCAAATGTAAATACGGCGATTGCGTAGAAGTATGTCCGGTAGATTGTTTCTATGAAGGGCCAAATATGCTAGTAATCAATCCAGATGAGTGTATTGATTGCGCTCTTTGTGAGCCTGAATGTCCTGTTAATGCGATTAAATCTAGTGATGATTTAAGCGAAAACGAAGAGCAAATGCTTGATCTTAACCGAGAACTAGCAGGTATTTGGCCAAATATCGTCGAAAAATGCGAACCTTGTGAAGATGCCGATAATTGGGCTTCTGTTCCTGATAAGTTAAAATATTTAGAAAAATAG
FTT1765	FLH154646.01X	FtCD00020775	AY774072		hypothetical membrane protein	ATGGTTAAAAAAATGAAAGCTGAACTTGATCCGAGAAAACTTATTGCTGGAACAACGATATCAGTAGCTATCTTATTTTTTGTTACTTATCTTGTATCTATAGCTGATGGTCATAATACTTTATGTAATCCTTTTATTTCAGGTTGCTCCGATATTACTCATGCTGGTTTTACTTCATATGAGAAATATATGCTCAAGGCAATTTTAATACCAACAGCAACATTGATGGCAGTGATATTCTTTTTTATCCAGAATCTACTTGTACAAATAAGTGATTATAGCAAAGCGGTAATCAAGCAAGGTAAAGTAATACTTTTTTTAGCATCAGTTGGTTGTATTGGTTTGATAATAGGTACGGCTGTGATTGATGGCCAAGATACGCTTATGAATTTACATCTA…
FTT1766	FLH154662.01X	FtCD00020779	DQ681509		O-methyltransferase	ATGTCTATCAAATCATTACTTAAGAGTTCAAGTCTTGACGATTATATCGATACTAATTCAGTTAAGTTAGATGTTATTGCACAGCAACTTTTTAATAAAGCAAAAAATGATGAACTAAGTCATATGCTTAGCTCACCTAACCAGTTACAGTTACTTAGCCTTTTGCTAAAAATCATTAATGTTAAAAGGGTTTTAGAAATAGGAGTTTTTCGTGGTTTTTCTACTTTAGTAATGGCACAAGCTTTAGCTGATGATGCTACTATTGAAGCCTGTGATATTGGCTATGAGTATCTTAAGCCATATGAGCATTTTTGGCAGCAGGCAAAAGTTGAACATAAGATTAACCTAAATATTGCACCAGCTCTTGAGACACTTGATAGATTTTTACAGCAACAGCTA…
FTT1767c	FLH154872.01X	FtCD00020804	AY774047	purT	phosphoribosylglycinamide formyltransferase 2	ATGAATATTTCTAATATCAAAATTATGTTGCTTGGTTCAGGTGAACTAGGCAAAGAATTCATAATAGCTGCTCAAAGACTTGGTATACACACTATAGTTGTAGATCGATATAAAAATGCACCAGCTATGCAAGTAGCTCACGAAAGCTATGTTATAGATATGCTAAATTCAGATGCTCTTGAGCAACTAATTCTAGCAAAAAATCCAACGTATATAGTTCCTGAAATTGAAGCTATAAATACCGATAGCTTAGTAAAACTAGAAGCTCATAACTTCAATATTATCCCATGTGCAAAAGCCGCGAAACTAACTATGGATCGCCAGGGTATAAGAGCTTTAGCTGCACAACAGCTTAATTTACAAACATCAAAATTTGCATTTGCAAATAGCGAGCAGGAA…
FTT1768c	FLH154940.01X	FtCD00020816	DQ681510		Chitinase	ATGCCATATTCTGATACCCAAGCTATTAACTACACAATTAGTATAAGTGGCAAAGATATTGGCTCAATCTCTCCTGACTCTTTTGCAATGACAAAAGATACAAATTCTATTAATCTAACTTATAAAGCTAAACCGGCACCAGTACCTGGAAAGTGTGATAGCATACCAAGTGATGTTAAAGATTTTATACCTAATGGAGAGGGAGGATTCTGGGGAGGCTATAGTAAAGGAGCTTTTGTTAAGTTTGATGGTAATATCTATGAACTTGTTGATAGCTATTGGACTAGTGCATCTCCCGCTGATGACTCTGGTTGGAAACTATGTGAAGCTGTAGTACAGGCTAATATTACTGTTAAAACAACTGGCTTACCTCAAACTATTAATAAGCTAAATATCAAA…
FTT1769c	FLH230141.01X	FtCD00039303	DQ681511	clpB	ClpB protein	ATGGATATAAATAAATTTACAATAAAACTACAAGAAGCTCTAGCTGAGGCTCAATCTTATGCTTTTCAACAAAAAGCAACTGAGTTTACATCAGCACATATACTAAAAGCTCTTTTGGAGCAAAATGATAGTGTTGCTATATCTATATTAAGCGTTTGTGGTGTTAATATACAAAACTTTATAAAAGCTGTAAATGATATGGTTGATAGTGTTGCGGTATTATCTGGAGAAGGTAACCCTCAAGTAACACCATCTAGAGATTTAATAGCTACATTACATAAAATGCAAGGGCTTGCTAATAAAAATGGTGATGAGTTTATCTCGAGTGAGGTTTTCTTATTAGCCTCTTTAGAAGACAAAAGTTTAACTGGACTGTATAACAAATTTGGTATTACAAAA…
FTT1771	FLH156842.01X	FtCD00021035	DQ681512		hypothetical protein	ATGTCACTTATACACATGACAAAAATTGATAAAAAGAATAAGGTACCTGTGCATTTAGAACTTAAAAAAAGTGTACTTGATGAAATTCTTGAGTATCTGAAGTGGGCAGAGATAGACGATCAAGCTCATTTCATAGAGGAGGCTTGTAGATATATATTTGATATAGATGAAGACTGGAAAAAATTTAAGAAAAATCATTTCGAAGCCACAGGCATAAAACTTGTAGATAAAAAAGAAACTAAACTTGATGTCTTTAATGAAATGGTTGGTGAAGATGAAGGTATGGTTAACTTAGAAGATGATGAAAATTTAGGAAATAAACTCGCAAAGAAACTACAAAAAAGTAGTAAATAG
FTT1772c	FLH204130.01X	FtCD00022594	DQ681513	trpA	tryptophan synthase alpha chain	ATGACAAATAGATACACAACCCTTTTTGCAAATTTAGAGAAAAGAAATGAAGGAGCTTTTATACCTTTTGTAACAATTGGTGATCCTAATAAAGCGCTATCCTTTGAAATTATCGATACTTTGGTTAGTTCAGGTGCTGATGCTCTTGAGTTGGGTATACCTTTTTCAGATCCCTTAGCAGATGGGCCAACAATTCAAGAAGCAAATATTCGCGCTCTGGAGAGTGGAATAACCCCTAAAGATTGTTTCGATATTCTAACTAAAATAAGAGCAAAATACCCTCATATCCCTATTGGTTTACTACTTTATGCTAATTTAGTCTATGCAAACGGTATAGAGAACTTTTATCAAAAATGTTTAGATGCAGGTGTTGATTCTATACTTATAGCTGATGTACCC…
FTT1773c	FLH157000.01X	FtCD00021058	AY774313	trpB	tryptophan synthase beta chain	ATGTCAAAACTAAATGCTTATTTTGGTGAGTATGGTGGTCAATTTGTACCACAAATACTTGTCCCAGCTCTTGATCAACTCGAGCAAGAATTTATAAAAGCACAAGCTGATGAATCTTTTAAGCAAGAATTTAAAGAGCTTTTGCAAGAGTATGCGGGTCGCCCTACTGCTCTTACAAAAACTAGAAATATAGTCAAAAACACAAGAACCAAGCTCTACCTAAAACGCGAGGATCTACTACATGGCGGCGCTCATAAAACCAACCAAGTACTTGGTCAAGCTCTACTAGCCAAGAGAATGGGTAAAAAAGAGATAATTGCAGAAACTGGAGCTGGGCAACATGGTGTTGCTACTGCTTTGGCTTGCGCACTACTTGATCTAAAATGTAGAGTATATATG…
FTT0235c	FLH204753.01X	FtCD00022936	DQ681514	rnpA	Ribonuclease P protein component	ATGGTAGAAAAGTTATCAGAAACAGAAGAGCTAAAGGTAGAGCAAAGCTTGCTGCATAATTTTTGCCTGACAAAGCAAAATATACTTGATAAAAGTGAGATCCAACAAGCTTTTGATAGCGTAGAGAATAAATTAAGCACGCTACACTTCACATTCCTTTTAGCTAAAAGAAATATAAAAGACCCTGGCTTGTGTGTGATCTTAACAAAAAAAAACATAAAAAAAGCTACCAAAAGAAACCTTTGTAGAAGAATAATTAAAGAATCATTCCGCTTACATAAGGATCTCTTAGATCATAAAAGCTTGATAGTGCTAAGTAAGAAAACAGCAGCCCAAGCAACTAAGGAAGAGTTGTGGCAATCTATAACAGAATTCGAATGTTTTTTAAAAAAATTACAC…
FTT0236c	FLH154586.01X	FtCD00020771	AY774037	rpmH	50S ribosomal protein L34	ATGAAAAGAACATTCCAACCTTCAAACTTAAAAAGAAAGAGAACTCATGGCTTCCGTGCTCGTATGAAAACTTTAAGTGGTAGAAAAGTTATCAGAAACAGAAGAGCTAAAGGTAGAGCAAAGCTTGCTGCATAG
FTT0237c	FLH154897.01X	FtCD00020810	DQ681515		hypothetical protein	ATGAAAAAAATATCTATGCTACTTATTTGCGGTCTTTGCTTTGCAACTGGCTTTGGTGATGAAATAACTACAAATAATCTATCAACTCAAAGTAACAGCGGTTCTAGTCTAGCAACAAGCACTGCGACTGTAAAAACTAAAATGCCTAAGCCTAGTGATCATGCTACACCAATGGCAATGAATGCTACACCAACTCCTTTAGGCAAAGATATAAGAGAGGGTAATATTCCAACCATAGATCAGCCAAAGCAACATCAACAGCTAGTTGGCTCAGATCCATCAACATGGACGCCAGCATATCTACAAGTCAAAAAGTTTAAAAAATGCTTAAGTACGGAAAACTATAGAGGATGGCAGGGATACTGTTTTCCCGCTGAGCAACCCAAAGAATGTCCTGAT…
FTT0238	FLH204807.01X	FtCD00022976	DQ681516	aroE1	Shikimate 5-dehydrogenase	ATGAAAGATTTGTATCATGTGATTGGCTTTCCGGTGAAGCATAGCTTGTCGCCAGCTATTCAAATGAGATTAGCACAGCAATATAATCAAGATATGCTTTTTACTGCTATAGAAGTTGCACCACAAGATTTAGAGGCAAAAATCCAAGAATTTAAGACTAATCCTCAAGTTAAGGGCTTAAGTGTTACTGTGCCACATAAAGAGAGAGTTTATGCCTTAGCAGATGATGCTGATACTACTGCTAAAGCTGTTCAGGCAGCTAGCAATGTTATATTCACAGCTGAGCGTAAAATGATTGCTTTGAACTATGATGGACTTGGCATAGTCAATGACATCAAAAATAATTATAAGATTGATTTTGCTGGTAAAAAAGTGCTTGTGGTTGGTGCTGGAGGTGCA…
FTT0239	FLH154894.01X	FtCD00020809	DQ681517	murC	UDP-N-acetylmuramate--alanine ligase	ATGAACAAAAAAATATTATTTCTTGGAGTTGGCGGTATTGGAGTATCAGCTTTAGCTATCGCAGCTAAAAGGCTTGGTGCACATGTTGCTGGTTATGATAGTGTCGCAAATAAACTAACAGCAAAACTTGAAGCTTTAGGAATAGTAATATTTACTAGTCCTAATGGTGTTGATGTTGCAAATTTTGATATTGTTGTATACTCAAGCGCTATACTTAGTAGTCATCCGCTGTTATCACAAGCTCGAAGTCTAGGGATACAATGCTTACAAAGGGCAATGTTCCTAGCTGTTTTAATGAAAGACTTTAGTTATAGTATTGCGATTACTGGTACACATGGTAAAACAACTACCTCAAGTGTTTTGGCAACATTACTTTGTCAGCTAGATAAGTATAGTAGT…
FTT0240	FLH154780.01X	FtCD00020793	AY774045		tetrapyrrole methyltransferase family protein	ATGAGTAGTATAGAAAAAGCAACGCTTTATGTTGTTGCTACACCTATAGGCAATTTAGAGGATATAACTTATCGGGCATTAAACGTTCTAAGTAATGTTGATATAATCCTAGCAGAGGATACCCGTGTCACAGCAAAGCTTTTAGCAAGCCTTAATATCCGTAATAATCAAAAACTAGTTTCTTGCCATGATTTTAATGAAGAGTCTCGTGTACAATATGTCAAGGAGCTTCTCGATGCAGCTAAAAGTATTGCTTTAGTAAGTGATGCAGGAACACCATTAATTTCTGATCCTGGCTATAAGATAGTAGCAAACTTGCGTAAAGAAAATTATAAAGTTGTACCAATACCAGGAGTCAGTGCGGTAATTACAGCTTTATCAGCAGCAGGATTGCCTTCG…
FTT0241c	FLH154905.01X	FtCD00020812	AY774065		hypothetical protein	ATGCATGGGATATATTACCGGAGCCAACAGTTTAAAAAAAGTTCACTATTTAGCCATATGTCAGAAAATATCCATTACAATCCTCAAACAGTGTTACAAGGGATATATGATCATTATAATCAACTTAAACCTCAGTATGAACTTATCACAAAAGATAGGTTAAACCGGCTAATTAGCACTAAACTAGGATCTTTACCTCAACAAATCACTAATTCTCAATTTAGTTATAGCTTAGGCTATAACTTTTTTGAAATCCCAAATAATTCTCCGGCATCAAGCATTATTGTTAAACAGGAGTTTATCAAAGGAATGAAAGCAGGTTTAGAAGGACAGAGATATAAACTCTCAACTCAGCAAGTTGCTGAGATTAGCTATATCATCGGAACTTTACTATATAGT…
FTT0242	FLH204781.01X	FtCD00022955	DQ681518		hypothetical protein	ATGTTACAGCGTGGATTATATACCTTAAAGGAGATGTTTAAACATCGTAAAAAACTCTACGGATTATCACAAGGATACCGTATCGATAGTATTATAAACCTATCAGCTAAATTGCTAAGGCAACAAGGAATTAAATATTTAGCATTGGACTTTGATGGCGTTCTAGCAAGTCATGGTAAGTCCGAAATGCATCCGGAGGTTATGCTTTGGTTTAAGGATTTTGTTACTGAATTTCCCGCGGACAGAATATTTATCCTCTCAAATAAGCCTACAGAAGCTAGACTTAAGTATTTTAATGCTAATTTTCCTAAAATTAGGTTTATTGCTGGGGTCGCAAAAAAACCATATCCAGATGGACTTAATAAAATCATCCAACTAGTAGGTTGCCAAGCAAAGGAG…
FTT0243	FLH154741.01X	FtCD00020787	AY774074		hypothetical membrane protein	ATGAAAAAAAATATTCTAGTACTAATTTTGCTATCACTGTGGTGTAATGCTTTTGCAAGTTACACATTTACACAGACTTTTTTTGGTTCTTACGATCCTTCATTAGATAGCAATTTTGCCTATAAAAATGATGATTATCGTGATGATGCTAAGATAGATAAGTATAACAACAAATTCAGCAAAGATGACTCTGATAATTATAATTGCTCTTTCGATAGTTCTGGCCAGATAAGATGTGGTGATTACAAAATCAAAAATCCTAAATATGAAGATAAAGATGTAGCTAAAAAGATCAAAGCAAACTTTAAAAAGCTTCAAGATGTTAAAGATATTAGTAAGGGTGATGATTTTAATTGTGCCCTAGATGATAAAGATGATGTGTATTGTTGGGGCAGTAAT…
FTT0244	FLH153748.01X	FtCD00020680	DQ681519		DNA/RNA helicase	ATGATTCAAGATTCTATACAATTTCTGACTAATTCTAGAAAATCAAAAATATTAGATGAAATTATTAATCAGTTTGAGAATTGTGAAGAGTTTATCATAAGTGTTGCCTTTATTACTTTTAGTGGAGTTGTATGTATCTTAGAGGTATTACGTCAACTAAGAGCTAAAGGGATAAAGGGTAAAATTCTTACAGGCTGTTATTTAAATTTTACCGAACCAAAAGCGCTTAAGAAACTCCTTGAGTTTGATAATATTGAGTTAAAAATCCTTAATGATGAAAACTTTCATGCTAAGGGATTCTTTTTTCGTAATAAAGATAGTTGGCAGATAATTCTAGGTAGCTCAAATCTAACTCAATCGGCTCTTACAATTAATAATGAGTGGAATTTGCTTATTAAG…
FTT0245	FLH154772.01X	FtCD00020792	AY774040	usp	universal stress protein	ATGGCGTACAAAAGGGTTTTATTAGCAGTAAATGTCTACGAAAACGCTGATATCGTGATTAACTCAGCTGTAGATTTTGCTAAAAAGAATAATACTCAAGTTTTGAAAGTTGTCACAGTTATTGACTGTGTTGCTCCATTTGCCCCATCTATAGTTGATTTTCAACACTCTATAGAGCAAGAGGCAAAGGAAGCTTTAGATAAGCTGGTAACTAAAATCTCAGGAATTAAAGTTGAGCATGAAGTGCTAGTTGGTAATCCGGCAGCAGAGATAGTTGAATATGCAGAAGAAAGTAACTGTGATGTGATCGTTTTAGGTTCACATGCGACTCATGGAATTAACTTACTTTTAGGTTCTGTTGCTAATACAGTGTTACATAAAGCTAAGTGTGATGTGTTA…
FTT0248	FLH231494.01X	FtCD00039378	DQ681521		hypothetical protein	ATGATTGATAGTGGTAAGTATCAAGCATTTATTAATGATTGGAATAATGATATCCAAGCATTTAGTTTTGATGCAATAAAAGATAAAACTACAACCGCTACATTAACCTATTATCGCAATAATGATAAATTCTTTAAAAATAGCCAAAAGCTCTATATTTCATTTACAGGAACTCAAATCAAGGTATGTAAGGCTGAAAACTCTTTTTCAGATGATTGCTCAGTAATAACAGCAACTTTGCCACAATATCAAAAAGGTGTTAAAGTAATGATATCCTCAGGAATAATAAAAGCCTATGCTCAATGTGATATGATTTATAATCATCATAATACCCATAGCACAGCTAATTCAAATATAATAATAAATATTTAG
FTT0249	FLH230069.01X	FtCD00039286	DQ681522	feoB	ferrous iron transport protein	ATGAAATATGCTCTAGTTGGCAATCCAAACTGCGGTAAAACAACAATCTTTAATGCTTTAACAGGACTTAACCAAAAAGTTGGTAACTGGTCTGGAGTTACAGTTGATAAAAAAACTGGTTTTTTTAACTCAAAAGATAAAAAAATTGAAGTTGTTGATATACCAGGAATTTATTCACTATCAGTATCAGATGCAAATTCTATTGATGAACAAATAGCCTATTCTTTTGTAGTTAAAGAGAAACCTAATGCTATTATTAATGTTGTAGATGCTTCTAATTTGAATAGAAGTCTTTATCTAACTATGCAACTTATTGAGCTTGGGCTACCAGTCATATTAGTGGTTAATATGATTGATGTTGCCAATAAAAAAGGACTCATTATTCACTATGACAGATTA…
FTT0251	FLH204746.01X	FtCD00022931	DQ681523	ilvE	Branched-chain amino acid aminotransferase protein (class IV)	ATGATAGATAAAATTTGGAAAAATGGAGAAATTATCTCCTATCAAGATGCAAAAGTTGGTATCAATACTCACTCTTTACACTATGGTTCATCTGTATTTGAGGGTATAAGAGCATACGATACGCCTAATGGAATTGGAGTACTAAAACTAAGAGAACATATGCAAAGATTTATGTACTCAATGAATGTCTTAGGTATGACATGCAAATATACTCTTGATGAGCTATGCCAAGCTGTATTAGATACTGTCAAAGCTAGCGGTAAAAAATCATGCTATATAAGGCCTTTAGCATATTTTGCTGAAGGAGGAGTCAATGTTTTACCTGCGAAAGATCATCCTGTTGATATTACTATTTATTGTATAGATATGGGTAAATATATGGCTGCAGATAAAGTAGAT…
FTT0252	FLH154901.01X	FtCD00020811	DQ681524	leuA	2-isopropylmalate synthase	ATGGATAAGCAAAGAATTTATATTTTTGATACGACTCTTAGAGATGGTCAACAATCTCCAGGAGCAGGCATGTCTTTTGAAGACAATATTGCATACGCGGACCTCGCTGATAAACTAAATATTGATGTATTAGAAGCTGGTTTTCCTTCTGCTAGTAATACAGACTTTGAAATAGTAAATACTATCTCAAAGAGGATGGCTGAGAGAAACTCTAATATGATTATAGCAGGACTATGTCAGTTAAGAAAAAACCAAGTTGAAATAACTATGGATGCCTTACGCCCATCATTAGCAATAGGTAAAGCTAGAGTGCATATGTATTTACCAGTAGATCCAAATTTAGCTCAAGCAAGTCTAGGTAGTAAAAATGATAATGAGCAGAATATTAAAAATGTTTAT…
FTT0254c	FLH204747.01X	FtCD00022932	DQ681525		hypothetical protein	ATGTCTAGTTTATTTCTTCTTTTAGAATCAATGCGTTTTAGTCCTGTTAAAGCAAATTCAAGAATCTTAGAATTAGGTCATAAAATACGTTTTGGAAGACCGTCAACAGTTACTTCACATATGATGATGAGTCAATTTCGAAATAAGGCAATAACCAGGAGTAATCAAAAAGAACTTGAATATACAATAAATGATTTTATTCTTAAAACTAGACCTGCTGAAATTAGTAGATTTTTTTCAGATCTTGAAGGAGTTTTAATGACTAAAATCGCTCCCCTTATTCAGTATAACTATAAATACTTAGGTAAATCCAATGAGTTATTATTCTTTTTCAAATTAAGATTTTCTCATTTGTGTAATTTGTTGAATTAG
FTT0255c	FLH156206.01X	FtCD00020952	DQ681526		hypothetical protein	ATGAAAGATTTTGAAGTAATACGCAAAGATTTTCTACAGTCAATAGAAATATATATCAATCATTCATATAAGAGCCACTTTTTAAGTATACATCATCGGCATAGGGATACCGACATTCGAAGAGCCGCTCTATTAAAAGATTATATCTTACATTGCCCTAACTTAACCATAATGAATCAATTAATCAAACATTATTTAGAAAAGTCCCGAGAACTAGAAGAGGTTCTTTTAAACCTTAAATTACAATATAAAAAAACAATCACTAAAGCAGAAATAAAAGTTGATGCTTCATTACTAAGGGGAGGAAATAAGCATCCAAGTTCTTTGTGGACTTATGTTAATAATGTTTTCCAACAAACTAAGAATCAAGCTCCCATAGAAAACAATTTATCTATTATA…
FTT0256c	FLH151548.01X	FtCD00020472	AY774932		Lipopolysaccharide protein	ATGAAAAAGTTAAAGTATTACATAAAAAATATTAGCAGAACTATTATACCTAAAAAGTTTTTTGAGCTAAGTTTGGAACATAAACTGAAAAGCATCGCAAAATTTGACAAAGAATATATCGAGTATAGAGTTAATTACTATAATAGGCTATCTAAACCATTTATGCTACAAAATAGCTCTAATTGGAAAAATTTTAAAAGAAACACTCCAGTATTTGACATTATTGACCATAGTCTTGTCAGAAAATCTATTAATTCCTCATACTTTTATGATTTTAAAGAGTTTTTAGTATACTTTAATAAAACCGATAGTTTTGCTACAGCTTTTTATGATCTTACTAAAATACCCCAACAACCAACTTTTGTAAAAAGTAGACCAATAGCTGATGATAATCAAAAC…
FTT0257	FLH156380.01X	FtCD00020970	DQ681527		Ribonuclease II family protein	ATGCAAAAAAATTCTCTAGTAATATTTAAATCTAAACCAGCAAAGGTTATTAATCTCTTAGATAAAAAAATTGAGATTGAGACTCTCGATGGTAAAAATATTAAGTTACCCGCAAAGAGTGTTCAATTACTTGTAGAGTCAGAAAAGGATTTTGAACTTGAAAGTTTAAAAGAGCTAGAAATAGCTGAACTTGAAATGACTTGGGAATTATTACAAGAGCAACAACAAACATCTGTTGAAGAGCTATGTGAGTTACTTTTTGAATCTATAGGGGTAAATCAGGCTTATACCGTGTGGCTTTTAGTTTCAGAAGGAGAGTATTTTAGCTTTAATGATGATTTTAGTATCAATATTCATTCACAAGAGCAAAAAAATGCAATAGTTAGAGACAAACAAGAG…
FTT0258	FLH156023.01X	FtCD00020933	AY774951		Carboxylesterase/phospholipase family protein	ATGAATTACGAACTTATGGAGCCAGCAAAGCAGGCTAGGTTTTGTGTTATATGGCTGCATGGCCTTGGTGCTGATGGACATGATTTTGTAGATATTGTTAACTATTTTGATGTTTCATTGGATGAAATCAGATTTATTTTTCCTCATGCTGATATTATACCTGTGACTATAAACATGGGGATGCAGATGCGTGCTTGGTATGATATCAAGTCACTTGATGCAAATAGCCTAAATAGAGTAGTTGATGTTGAAGGTATAAATAGTTCAATAGCAAAAGTTAATAAATTAATAGATAGTCAAGTCAATCAAGGTATTGCTAGTGAAAATATTATCTTAGCGGGTTTTTCACAAGGTGGTATAATTGCTACCTATACGGCTATTACATCTCAAAGGAAGCTT…
FTT0259	FLH204752.01X	FtCD00022935	DQ681528	hemC	hydroxymethylbilane synthase (porphobilinogen deaminase)	ATGAAACAAATAACTATAGCTAGTCGAGAAAGTAAACTAGCATTATGGCAGACAAATTTTGTCAAAAATCGTATCCAATTAGAGCTAAACATTCCTTGTGAAATAAGTACTATGAAAACACAGGGAGATATTATTTTGGATCAACCGCTAAACAAAATTGGTGGTAAAGCACTATTTATGAAAGAGCTAGAAGTAGCAATGCTTAGTAATAAGGCTGATATTGCTGTACATTCTCTTAAAGATGTTCCTTACCAATTACCGCAAGGTTTTTGTTTAGCAGGTTTTATGCCAAGAGAAGATCCTCGAGATGCTTTTGTATCAAATAAATATAATTCTATTGATGATTTACCTAAAGGAGCTGTTGTTGGAACATCTAGTCTACGGCGAAAAGCGCAGCTT…
FTT0260	FLH158033.01X	FtCD00021185	AY774489	crcB	CrcB family protein	ATGGGACTTTTATTATTATTGGTTGGTATTGGTGGTGGTTTTGGTGCAATGGCAAGATTTGCATTGACTCAAGCAACCGCAAGTATTTCTAAGCAAATTCCTTTAGGTATTTTATTATGTAATATTATTGGCTCACTAATTATTGGTATGATGGCTGCATTCTTGATAGAAACTAAGCTTTTTAATGAAGATGTTTCGACATATGTCAGATTTCTTTTAGTTACAGGGTTTTTGGGAGGCTTTACTACTTTTTCTAGCTTTAGTTTGGATATCCTAAACTTATTACAACGAGGAGAGATTTTTATAGCTATAGGATATATTATGGTTAGTGTCTTAGCATCATTAATAGCTGTTATATTAGGGTTTTATATAGTTATGGGAGTTTATAAGTAG
FTT0261	FLH204755.01X	FtCD00022938	DQ681529		hypothetical membrane protein	ATGATAAGAAAAATAACCGCACTATTTTTATTTTGTTTGCTTATAGTTAGTTGTATGCTTTTTTTAGGAGGTAATATGATTGTCAGAGATAACCGCTTTGAGTCTGATTTGGGACAACATAGTCTCCAGATGCAGCAAGGTACAACGGTTAAACAGTTATATGATGCAATAAAAAAAGCTGTAAAAGCTAATCCTGGTGAGTTTGAGATAAAGGCTGATGATTATAGTAATCAAAAAGCTACATTATGGACATTTTCAAATAAATATAATCAACCAGTTACTTTCGAAGCGGTTCAAAGAGCTGGTCAAGTTTATTTAAGTATAAGTGTAGGTGAAGAGGGTCAGGCAAGGGTGAATAATGATGTTATTTATTATCTACAAGATTTAGTTTTGAATAAT…
FTT0262	FLH151408.01X	FtCD00020446	AY774901		hypothetical lipoprotein	ATGCAGAAATACTCACCGCTTATTTTGTCACTGCTACTAATATCATGTTCAAGCAATCCTGAAATCACTAGGATAGGTCCTGGAATTATTAAATCTCAACAGCAGCTAATAAGTAAAGAACAGCTAAAAAAAAGATAG
FTT0263	FLH204751.01X	FtCD00022934	DQ681530		hypothetical membrane protein	ATGGCTGGAGCTATGATAGGAGGAGTGATCGGAATAATTGGTGGCGGTATTTGTACAATAATCACTTTAGGACTTAGTGCAGTACCTTGTTTTGCTGGAACAGTTGGTGGTGGTATGGCGTTAGGAGCCGGAGTTGGAGCTGGGACAGGAGCATTAGTTGGAGCTGGTGGTGGTTATATTTATGTGTCAAATAAAGATGACATTATTGGTAAGTATAAGTATGAAGTTTTAGAAGATGGCAAAACATCACCGATAACTTTTGAGCAATTTCCTGATAGAAATTATTTGGCAGGTCAAAAAGTTGATATATATACAAGTAAATATAAGGGAGAGAAAACTTATTTTATTAAAGCAATACAACAAGATTCTAAAGAAGATTAG
FTT0264c	FLH204729.01X	FtCD00022922	DQ681531		hypothetical protein	ATGAAAAAAGAGCAAAAAGTGATTAAAGTTCGTCCAGGTGAGCGTGTTTCTTGCCCAACGAAATATCATGAAAACTGGAACTTACATCCTAGAGTATATATTGACTTAAAAGATAAAAAAACTAATAGTTGTCCTTACTGTGGAACGACTTTTAAAGTAGAAAAAGAAGCCTAG
FTT0265	FLH231506.01X	FtCD00039384	DQ681532		ABC transporter, membrane protein	ATGAAAAGGTTATATAGCACTAATATGTCAGCAAAGGTTTCTCGCACAAAGTGGGATATTTTAGCTTTATCAATTATACTTCTGATATTAAGTATCTTTGTATGGTCAACCTCTGACCTTGGCGGTTCTATTGATTATAAAAGTCAGGCTAGTGTTCTTAAATACTCAGATATTTCGTTAAGTCTTTGGCTCTTGCCTTACTATACAGCGGAAACAACAATTAGAATGTTTATAGGTTTAGTTATTTCACTACTTATAACATTTATATTTGGAACATGGGCAGCAAAAAATAAAAGAGCAGAAAGTATAATCATACCGCTTGTTGATATTTTACAGTCAATACCAGTTCTGGGTTTCTTTGCAATTACAGTAACAGGATTTTTAGTTATATTTCCAACC…
FTT0266	FLH158052.01X	FtCD00021187	AY774494		ABC transporter, ATP-binding protein	ATGACTAAGAAAATATTTACAGTAGAAAAAGTTAATAAAGAGTTTAATATCAAAGGTGGCCATTCTCTTAAAGTCTTGGATAATATAAATTTTACTCTTTATGAAGGTGAAGTTGTTGCTCTATTAGGTAAGTCCGGCTCAGGTAAGTCAACTTTATTAAGAATAATTGCAGGCCTTTTAAGTCCAACTAATGGTGATGTGCTCTATCGTGGTAAAAAAGTCTCTGCACCTGTACCAGATATTTCTATGGTTTTTCAGAGTTTTGCACTGATGCCATGGTTAACAGTTTTACAAAATGTGGAGCTTGGACTTGAGGCACGTAAGATAAGCTTAGAAGAGCGTCGACAAAGAGCTCTAAAGGCTATCGATATGGTTGGTCTAGATGGTTTTGAGAATGCT…
FTT0267	FLH231502.01X	FtCD00039382	DQ681533		hypothetical protein	ATGCTTTTCTGTTTAGTATTGGACGCGCTGCTATTAAGCAAACAGATGAAAAACAGAATATCAAAGAATCTATATGCTTCTACAATAATTGGCCAAAGAGATAAGTTTCCTAATTACTCAATGTTTTTTGGAGGATACTTTGAAGGAGATGCTCAAACATGGTTTGGCAGTCAAATAAATAGAGCTGGCGGAACTTCTGATTTTCCAGCGACTGGTCAAAATATATATATGACAACAGTAGACTTATATTTCCTAGCTAATGTAGGAGAATATATGACAGCAGTATTTGATTTTCTTACTGATGACAATAGTGATTTTGGACTTAGGAATGGTTTTGTTATCTTAGGTAATTTAGATACATCACCTTTTTTTGTAACTGTTGGCAAGAATAGAAGGATA…
FTT0268	FLH204819.01X	FtCD00022981	DQ681534		Sodium/hydrogen exchanger (antiporter) family protein	ATGAGTAATAATATGGAACTATTTGTACATTCGTCTAATTATATTTTACTAGCATCTGGCTTAATATTGTTTTTTGCTATTGTTTCACAGTTTTTATCTTGGAGATTAAAGCTACCATCGATACTTTTTTTAATTTTAAGTGGAATTATCCTCGGACCTCTATCAGAAGCAATATTCCAAACTGGCTTCAAGCTGGTTGATGGTAATGTTATATTTGGTGAGGCGTTGTCACCTTTTGTTTCAATCTGTGTGGCAATAATTCTTTTTGAGGGCAGCTTATCGCTAAATTTTAGTAAGATAAAAAGTGTAAGTAGTGTTGTTATACTTCTGATTACTGTAGGTTTAGCAATTACTGTTGTACTTACAGCCTTGTTCTGTTATTACGTTGTTGGTTTGAAT…
FTT0269	FLH158104.01X	FtCD00021196	DQ681535		carbonic anhydrase, family 3	ATGTCTAGATGTATAAGAAGCTTTAATGGTAAATATCCTAAAGTAGCTGATTCAGCTTATGTTGATGAGTCAGCAGCAGTAATTGGTGATGTTATCTTAAAAGAAGATTCATCTATATGGTCACAGGTCAGTGTAAGAGGAGATCTCTTAACAATCACTATTGGTAAAGGCACTAACATACAAGATTGTAGCACACTTCATACTACTGAATATCCTAAAGATTCTGGTCAAGGCTTTGCCTTAACTATAGGAGACTACGTGACAGTAGGACATGGCGTTGTATTACATGGCTGTGAGATAAAAAATAACTGTCTAATAGGTATGGGTTCGATAGTTCTCGATGGAGCAGTAGTAGAGCCTTGGGTTTTTCTCGGTGCTGGCAGTTTGGTACCACCAGGA…
FTT0270	FLH151749.01X	FtCD00020509	AY774937	lolB	lipoprotein releasing system, subunit B, outer membrane lipoprotein	ATGCTGAACACTATGTCAAAGTTAAAAATAGATACAAAGCGCAGATTTAGTTTACTTATTGCTTTAGTACTAATTATCTCATTATCATCTTGTGCTACAACGCAAACTAATGTTACAACTAAAACAGTTTTTAATCAAGAGACTACTTACCATAACTTACTTAAGCTTAAAAAATGGCAAGCCAATGGTGTTATTGGTATTATCTATGATAATCAGGCTGAATCTGCTAATTATACATACTTACAAGATGGTGATAATTTTAGTATCAAACTTTATGGTCCATTAGGAATAGGTAGCATTGAAATAAAAGGCGATACGAACAGTGTTTTACTAGCGAATAGTAAAGGACAAAAGCTAACAGCAAAAGACGCTAAAACTTTGATGTTAGAGCAATTAGGC…
FTT0271	FLH157924.01X	FtCD00021168	AY774519	ispE	4-diphosphocytidyl-2-C-methyl-D-erythritol kinase	ATGGCGAATATAAAAGCTAAAAAATACTATAGTTATGCAAAGATAAATCTATTTTTGCATATATTAAACAAACGTCCAGATGGTTACCATAATTTACAGACTTGGTTTACCTTTTTGGACTTAAAAGATCAACTAACTTTTAGTTTTAATAATTCACGAGAAATTAATATTTCGAGTAATATTAGTATTGCTGCAAAACAAGATAATTTAGTATATAAGGCTATCAAAAAATTTCAGCAAAGCTATAGAGTGCAAGATATAGGTGTTGATATTGAAATTAAGAAAAATATTCCAATGGGAGCAGGACTTGGCGGTGGAAGCTCAAATGCTGCTACTACACTTATAGCTTTACGTGATTATTATTTGCCGCAGTTGTCAAATGAGGAGATGATTCCATTA…
FTT0272	FLH204743.01X	FtCD00022929	DQ681536		hypothetical membrane protein	ATGTTCCTGAATATATTATCTTATTTGCAATCACTTTTACTTTTGACTTTCGTATACTTTTTGATAAGACAAAAAAGGGTTGCATGGTTATTTGTCACCTTGGCATACGCTTATCCATTTTTGAGTGAGATTATCAAACTTAGTCAAGCAGTGACAGTACCTGTAGATTATTATCTGTATGCTATCCCAAATGCTTTATTGTACCTTGCGGTAGCTATATGGGGACTATTGACATCAAAATCTCAACACCTAGTAGCTATTAGACAAAGGAGTAATTATATAGTTAATCCGAAAGATATTTGTAGAAAAAGATATTTGTAG
FTT0274	FLH204739.01X	FtCD00022926	DQ681537		hypothetical membrane protein	ATGTATGAGAATATTATTAATCCTACACCTGTAAAAAACATCTTAATAGCACTTTGTACCGCACTAGCTATGCCTTTATCTTTTTTGAATCCTTGCATACACATTGATAGTATTAATGGCGCGATAATACCACATAGAAAAGCTGTACCAATGCCAAATATAATTATGGTAAAAGTATTTGTATATAACTTAAACAATAATATAAATGCTATAAAATAG
FTT0277c	FLH152946.01X	FtCD00020589	AY774349		conserved hypothetical membrane protein	ATGTATTATTTAGCATGGATTATATCAGCTGGTCTAGCAGTTACAGTAGGTTGTTTCGTAGCTACTAGATTAGAAAAAAAAGAAGATCAATCAAAATAG
FTT0278c	FLH153235.01X	FtCD00020623	AY774354	cydB	cytochrome d terminal oxidase, polypeptide subunit II	ATGTTATTAGACGTGTTACAGATTATCTCTTGGCTAGTTGTAGGAGTGCTAATATTTTTGGTAGCCGCTACAGTTGGTTTTGATTTTGGGGTAGGAATCCTTGCAAAATTCGTTGGTAAAGACGATTACGAGAAAAGAGCTATCATAAATACCGTAGGACCTACATGGGATGGTAGCCAAGTTTGGTTTGTCACCGCTGGTGGTGCTATATTTGCAATCTGGCCTCAAGTATATGCTACTAGCTTCTCAGGATTATATATTGCAATTTTAGTAGTACTATGGGGACTTTTCCTTAGACCTCCTGCTTTTGAGTATAGAAAGAAAATAGACAATCCTAAGTGGCGTAATTTCTGGGATTGGATGCTTGTACTTGGAAGTATAATCCCTATAGTTGTGATG…
FTT0279c	FLH204813.01X	FtCD00022980	DQ681539	cydA	cytochrome d terminal oxidase, polypeptide subunit I	ATGAGCTATAAGGAGAAAATAAATATGTTACCAACGCTCATGTCTGTTGACTTAGCAAGATTACAGTTTGGTTTAACAGCATCATTTCACTTTTTATTTGTTCCTCTAACTTTAGGTCTAACGTGGATCTTATTCACAATGGAGCTAATGTACATAAGAACAGGTAAAGAAGTTTATAAAGATATGGTGAAGTTTTGGGGTAAATTACTCGGAATAAACTTTGCACTAGGGATTATTACTGGTTTGACCATGGAATTTGAATTTGGTACTAACTGGTCATACTACTCTCAATCAGTAGGTGATATTTTTGGTACACCACTAGCTATTGAAGGTTTAGCAGCATTTATGCTTGAGTCTACATTTGCTGGTTTATTTTTCTTTGGTTGGGATAAACTTACA…
FTT0280c	FLH153267.01X	FtCD00020626	AY774571	yajR	major facilitator superfamily (MFS) transport protein	ATGTACAACTACGAAGTTAAAACAACTATAAATATATCACTAATATATAGCTTTAGAATGATTGGGTTATTTATAATCTTCCCAATCTTTAGTTTGTATATCAATCATCTAGAGTATGCCACACCATTTTTGATAGGCTTAGCTCTTGGAGTATATGGCTTAAGTCAGGCAATGCTTCAAATTGTATTAAGCATTCTATCTGACAAATTTGGGCGCAAACCAATAATATTTGTAGGATTAATATTTTTCATTATTGGCAGTATAGTCGCTGCCTGCTCAAGCACTATATATGGCATAATCATCGGGCGAGCAATCCAAGGAGCAGGTGCAATAGGTAGTACTTTAACAGCTCTTGTGGCTGACTCAACTAAAGAAGAAAATCGCCTCAAAGCGATGTCT…
FTT0281	FLH151516.01X	FtCD00020465	AY774913	cyoA	Cytochrome O ubiquinol oxidase subunit II	ATGAACTGGAAAAAATACTTGCTAATCTTGTCTAGTGTTGTCGGAGTTCTGTCTTTATCTGGTTGTAAGGGTGGTATCTGGAATCCGATGGGTGTTATTACAGCACAAGAAAAACAACTGCTTATCTTTGCAATAGTTCTTATGCTTTTTGTAGTAGTACCAGTTATAATCTTGACTCTTTGGTTTGCTTGGAAGTATCGTGATGGTGCTAATGCTGAGTATCGCCCAACTTGGAGTCACAGTAATAAGCTAGAGATAATATGTTGGGGTGTGCCATTTATAATAATTTTGATATTAGCTATTGTTACTTGGAAAACAACACACTCATTGAGTCCTTATAAACCATTAGAATCTGACAAAAAGCCTGTTGAGATAGATGTGGTAGCTCTAAATTGGAAA…
FTT0282	FLH153684.01X	FtCD00020673	DQ681540	cyoB	Cytochrome O ubiquinol oxidase subunit I	ATGCTAGAAGCATTAATTGGAAAATTAAATAATCCGCATTTAGTGTTTCCATACCTATATGAACCAGTAAGTCAACAGTTAATTATATTAACAATGTTTATTGGAATCGTAGTCGCAGGTGTGGCATTACTAGGCGGTATTACATATTTTAGAAAATGGGGTTACTTATGGAATGAGTGGTTCACTACTATTGACCATAAGAAAATAGGTACTATGTATACTATCGTAGCATTAGTGATGATGTTTCGTGGTTTTGTTGATGCTGCGATGATGAGAACACAGCAAGCGTTAGCATCTGGAGATAGTACAGGATATCTAATCCCTGAGCATTTTGATCAAATCTTCTCTGCTCATGGTGTAATTATGATTTTCTTTGTGGCGATGCCTCTTATATTTGCA…
FTT0283	FLH153286.01X	FtCD00020629	AY774580	cyoC	Cytochrome O ubiquinol oxidase, subunit III	ATGAGTACAGTAACTGCAGAACATAACCATCATCATGAACATCATTTTGATGGTTCAAAAAATGTTTTTGGTTTTTGGATATATATTATGAGTGATTGTGTGCTTTTTGCGACATTATTTGCAACTTTTGCAGTATTTCATAAGCACACATTCGGTGGTCCTGGTGCACAGGAGCTATTTAGCCTACCATACGTATTTGTTGAAACAATGTTACTACTAATAAGTAGTTTTACATTTGGTTTGGCAATGCTTAACCGCAACTCTGAGAATATTAATCATGTGATTAAGTTTTTATGGATTACTTTCTTTTTAGGTTTAGGATTCATAATAATGGAAGTGCATGAGTTTTATGAGCTAGCTATCGAGGGTCATACGTGGTCTTCAAGTGCATTCTTATCA…
FTT0284	FLH153122.01X	FtCD00020611	AY774594	cyoD	Cytochrome O ubiquinol oxidase subunit IV	GTGGCTAAAGAACACTTATACGATCATGATACAGGCGCTGCATACGGTACACATAAGAGCTATATACAAGGTTTTGTGCTATCTGTAGTTATTACTACTATAGCTTTTGTTTTAGTTGGATTTAAGCTTTTATCTCCTGTTGCTTTATGTGTGACTGTGGCAGTATTAGCAGTAGTACAGCTTTTTGTACAGTTAGTGTTTTTCTTGCATCTAAGCACGGATTCAAAAGCACGTTGGAACTTGGTAAGTGCAATTTTTGCAATTATTGTAGTTGTAATTGTAGTTGCTGGTACTATGTGGATCATGTTTGACTTATATGACATGATGATGTAG
FTT0285	FLH153056.01X	FtCD00020601	DQ681541	cyoE	Protoheme IX farnesyltransferase	ATGTATTTCAAAAGATATCTTCAATTAGCTAAGCCAGGTATTATTTTTGGTAATCTTATTACTCTTACAGGTGGTTTTTTATTAGCTACACATCGAGAAATAGGTTTTGAATATCTACCTTTGTTTGTATATGTGATGATTGGCGTTGCATTAATGATTGCTGCTGGTTGTGTCTTTAACAATATTTATGATAAAGATATTGATAGTAGTATGACACGTACGCAAAATCGTCCTTTAGTTACTGGAGATATCTCTGTAATCCAAGCAACTATATATGGGACGATATTACTTATATTAAGTTGTTTGGTTTTATATTATTTAGTCATTCTATTGACACTATGGATTATAATTATAGGTTTTATAGTCTACGTAGGTATTTATACAGTTTCAAAACGTTTG…
FTT0286c	FLH153184.01X	FtCD00020618	DQ681542	lpxD1	UDP-3-O-[3-hydroxymyristoyl] glucosamine N-acyltransferase	ATGCAATACACTCTAAAACAAATATCCGAGCATCTAAATGCAAAAGTAATTAATGAACCAAGTGGTGAAGTTATTATAACGGGGCTTACCTACGCTGAACAAGCAAAAGAAAATGATCTAACTCTTATTGATAAACAAGAACATATTAAGCTTTGGCAAAATTCAAAAGCTACAGCTGCTATTGTAAGTAAAAAAATTAGTAAAGAATTAGCACAGGTAAATGACAAGCCTCTAATTGTAGTCAATAATGCTGATTTAGCTATGGCTAAAATATTAGAACTTTTTTCTGTGCCATACCCAGAACAAAATGGTATTCATGAAAAAGCTATAATAGATCCAACTGCTAAAATTGGTAAAAATGTCTCAATTGGACCCAGCGCATATATCGGTAAAAATGTC…
FTT0287c	FLH152966.01X	FtCD00020592	AY774360		hypothetical protein	ATGGATCGCTTTAGTAAAATTACAAATGTGCATATGTACAAGAGAGAAATTGTACTGCTTAAAAGTCGTCCGTGTGCTTACGGCAAATGTACATTTTGTGACTATATTTTAGATAACTCTAGAAATATTGATGAGATCAATGCGGTAAATTTTGAAGTTTTAGCGAATGTCACTGGCGAATTTAGCATCTTAGAAGTAATTAATTCTGGTAATGTTTTTGAACTTCCTCAAGCTACTAAACAGCGCATCAAAGAAATAATAAAACAAAAAAATATTAAGCTACTTTTTGTTGAAGCACACTGGATGTATAAAGACCATCTGCACAAAATTAAAGATATATTTGAGACGGATATCTTTATAAAAACAGGCTTGGAAAGTTTTGATAATGATTTTAGAGAA…
FTT0288c	FLH204742.01X	FtCD00022928	DQ681543	pdxY	Pyridoxal/pyridoxine/pyridoxamine kinase	ATGTCTTTAAAAATCCCTAAAGTATTATCTATCCAATCTCATGTCGCCTATGGCTATGCCGGTAATAAAGCAGCAGTTTTCCCAATGCAGAAACTAGGCATAGAAGTTTCGCCAATATACACAGTACAGCTATCAAACCATACTCAGTATGATTTTTATAAAGGATCTTTCTTTAGTGCTGAAGATATCCAAAATGTTATCGATGGTATGATAGCAAATGGTTTTTTAGCACAACAAAATGCCATCTTATCTGGATATATTGGTAACTTAGAGATTGCCAAGGTTATTGCAAATACTGTTATAGAGCTTAAAAAGTTAAACAGCGATAGTTTATATTGCTGTGACCCTGTCTTTGGTGACAAGCATGATGAAGATGAAAACGGCCATATTTTTGCATCT…
FTT0289c	FLH151552.01X	FtCD00020473	AY774933		hypothetical lipoprotein	ATGAAAAAAATCAAACTTTTAGCTGCATATACATTAGCTACACTTACCCTAGTTAGCTGCTCAAATAATGCTAGTCTTTCTAATGATTTAAATTCAGCAGGTGATTCTATTGTCAGATTTGTAAACGGTACATTTTATGCTGAAATTTACAATACTAGTTTACAAAGCGTTTATAATGCTACACTACTAGCACTAAATAACAGCAATATCTATAGCGTAAAGAATAACACCATCAATAGTAAAGATGCTGAAATCACTGGTACTTATGCTACAGATAAAAATTTCTTTAATAAGTCTGGACAAGATGATTTTGCTATTAGACTTGTTAAAGGCAACCAAGACACTATTAACTTATTTATCAAAATAGGCAAACTTGGTGATAAGCAAGCATCTGTTGAC…
FTT0290	FLH153127.01X	FtCD00020612	DQ681544	moxR	methanol dehydrogenase regulatory protein	ATGTCGGTATATAATCATTTTCAAGAATTATTAGAGTTTTTAAACAACCGTGTTGTAGGTCAAGAGAACCTTAACAAACGTCTATTAATCGCTTTATTAGCCGGAGGGCACTTACTTGTAGAGGGGGCGCCTGGTTTAGCTAAGACAACGGCTATTAAAACATTATCTGAGAGTATAGATTGCTCATATCATCGTGTACAATTCACACCAGATCTTTTACCTGCGGATTTGACAGGTACAGAGATTTATATACCACAGCAACAAAGCTTTGAATTTCAGTCTGGACCATTATTTCATAACTTATTACTTGCTGATGAGATTAACAGGGCTCCTGTCAAGGTACAATCTGCACTTCTTGAAGCAATGGGCGAAAAGCAAATAACAGTTGGTAAAAAAACT…
FTT0291	FLH153094.01X	FtCD00020606	AY774578		hypothetical protein	ATGAAAAGTTATAAAGGTGTCAAGCCGGATATCCAAGAGCTTTTAAGTTATCGCTACCAAGCTAGAGCATTAAAGCTATTTGCTAATCAAAGGGTAAATACTACTAATGCTGGTAATAATATTTCTAAGGCGAAAGGTCGTGGTATGGATTTTGATGAGGTAAGACATTATCAAGCAGGTGATGATATCCGTCTAATGCATTGGGCTTTGACTGCAAGACTTGGTAAGCCATACACTAAAGTTTATCATGAGGAGCGTGAGCGTAGCCTTTATTTTATTCTAGACCAAAATACTACAATGAACTTTGGTACTAAGGAGTGCTTCAAGAGTGTTAAGGCAGCAAATATTTTAGCTTTGCTTGGCTTTGGAGCATTAGATGCGCATGATAAAGTTGGTGGT…
FTT0292	FLH204765.01X	FtCD00022948	DQ681545		conserved hypothetical membrane protein	ATGCAAACTAATAATCTTTTAGAACAATTAAAGGATATTTATTTGCCAGAGAAAGTTTCTCAGTGGTGGCCATTAGCTTATGGTTGGTGGCTACTTTTAACCGTAGTTATTTTGGCTATTATTGTTGGTTTGGTATTTTTACATTTGCGTAGAAAAGCAAAGAGCTATAAAGATTGTATAATAGATGATTTTAGAGAAACTGTAGAAAAGACTTATCAGCAAAAGCCTAAAGAAGTTCTACAAGATATTTCAGTATATCTAAAAAGAGTCGCTTTACAAAAGTTTCCTAATCAACCAATTAAGACCTTACATGGTCAGCAATGGCTTGAGTTTTTAGATACAAAACTTAAGCAACAAAGTTTTAAAACTACTAAAGCTAATATGCTTGGCAATAGCTAT…
FTT0293	FLH231497.01X	FtCD00039379	DQ681546		hypothetical membrane protein	ATGGTTAAGGAGAGTTCTATGATAAATATAGAATATCCATGGTTTTTTGCTTTAATTATTTTACCATTTTTAGCTTATTTGCTGCTGCCAAGAGCAAAAAAAGATAAGCAGCTAGCTTTGAAAACACCATTTTTTGAAGAGCTAGAATCTCAAATTGGTAATGCTGGTACTCGTAATTTCAAAAAAGCAAATTACCTTAAATATTTATTAGGCCTTATTTGGATACTTTTGATTATCTCAGGGTCAGGTATTCAATGGCTAGGTAAACCAGTTAGTTTACCTCAAAGTGGTAGAGATCTAATTATGGCGATAGATTTATCTGGAAGTATGGCTATCCAAGATATGAAAAAAGCTAATGGACAAATGGAATCAAGGTTTGATCTGGTGATGCGTGTTGCT…
FTT0295	FLH231504.01X	FtCD00039383	DQ681547		conserved hypothetical membrane protein	ATGAAAACTAAGTTATTTAAACTAATAAGTATATTGATATTATCAGTAGCTATTTTCAATCTAAGCTATGCTAATGTCTCAGCTAGTGTCGATAGAACTCATCTTGAAAAAGGCGAGACATTTGAACTAGTGTTGCATCTAGATAACTTTGATATACAACCAGATTTAGATGTTTTAGATAAAGATTTTACTGTTTATAACACTAGTACTAGTAGTAAAACCACTATTGTTAATGGACAACAGAGCTCTCAGTTTGAGATGATTGTCACGCTTATGCCAAATAAAACAGGTAAGCTAACAATACCAGCAATTAAGATTGGTAACCAGACCACTAAACCGATTAATATAGAGGTTGATAAAGAGCTTTCGAATAAAGAAGAGCGTAATTATCAAGATTTG…
FTT0296	FLH204789.01X	FtCD00022962	DQ681548	pcp	Pyrrolidone-carboxylate peptidase	ATGATTATGAAAAAAATTTTATTATGCATATTTATGTTTGTGGCTTTTGTTGTTTCAGTAAATGCACAAACTATCCTTGTAACAGGTTTTGCACCTTTTTGTGGTGAGAAGATAAACCCATCTTGGCAAGCGGTTAAGCAACTCCCTGATAGTATTGATGGAGCCAAAATTATCAAAAAACAAATTCCTGTTTCATTTAAGGGTTCTGTTAATGATTTAGACAAATTGATAGAGAAATATAACCCTGATGTGATTATTGCGGTTGGTGAAGCTGGCGGTCGAGCAGCAGTATCTATCGAAAGAGTAGCGATAAATGTTGATGATGCTAGAATTGCAGATAATGATAACAACTATCAACCTAAGAATATCAAAATCTCAGCAAATGGCGAAAATGCTTAT…
FTT0297	FLH150514.01X	FtCD00020359	AY774785		hypothetical membrane protein	ATGGAGAAAGACTGGAAATATTATTTAGGTATATTACTGTTTATTTTATCATTTGTGCCATATATTTTAGTTTTTGTAATTATGCCTTTTTTAGGATTATCTACATCTAGCTATCTAGCTGCTTCATCTATATTACTTATTAGTGCCGAAGCAATATTTCTAGTCTCTGTGATGCTCTTGGGTAGAGCAATAATTGATGCTATAAAAGCAGCAATAAAAAAGGTCTTTAAATCTGCGTTTACAAATCAAAAACCTATTAGCTATACAAGACATAGTATTGGTTTAATTATGTTTTTTGCAAGCTTAGTGTATCCAACATTATTGCTAGAGATGATACTTATTTTTGATAAAATTAATCAAGTTGGCCAGCTCAATATGATGCTTATTCTATTTAGTGGA…
FTT0298	FLH204759.01X	FtCD00022942	DQ681549	holC	DNA polymerase III (CHI subunit) protein	ATGATGAAAATAGAGTTTAAGGTTTTGCAGACACAAGATATTAATCAAATGCTAGAAGTGCTGATTACTGAAGTTGTCAAAGAATATGCTTTACAAAAGACAATTGCAATCTTAGCACCAGCAGGTATTGCAAAACAACTAGATGATAAACTATGGCAAGATGGTCAAGATTCTTTTATCCCACATCATTGTGCTATAAATGCTAGAGAGTATAATCAATATAATAATATTCCAATTCTTATCACAGATAATCTATTTATTACCTCAGGTTATGATGTTTTAATAAATATTATGGATGTGGCTGTAGACCCACAGCGAGTTAAAGTCAAAGAGCTAAAAGAGTTTGTCTATCAACAAGATAGCGCTTTACAGGCTTCACGTAAGAAGTATGTTTACTAC…
FTT0299	FLH230014.01X	FtCD00039271	DQ681550	valS	Valyl-tRNA synthetase	ATGACTCAAGAAATAAATAAAAATTATAATCCAAAAGAAATCGAACAAGCAAATTACCAAAATTGGGAAGCTTCAGGCAAATTTGCATGTGGTAATACTGACTCGAAAGATACATATACAATCATGTTACCACCTCCAAATGTAACAGGTACTTTGCATATGGGACATGGTTTCCAGATGTCATTGATGGATATTTTAATCCGTTATAATCGTATGTCAGGCAAAGATACTCTATGGCAACCTGGTACTGATCATGCGGGTATTGCTACACAAATGGTTGTAGAGAGACAGTTAAATGCTCAAGGTATCTCAAGACATGATTTAGGGCGAGAGAACTTTGTAAGCAAGGTTTGGGAATGGAAAGAGCTATCAGGTGGCACTATCACATCACAGATGCGT…
FTT0300	FLH150319.01X	FtCD00020337	AY774781		hypothetical protein	ATGAAGTTAGAAAATGTGTTGTCAAATTTGAATCAGGTAGAGAAAAATAAGTTTATTAATGTAATTGATAATCTTATCCAAGAAAATAATATATCAAAACAGTATAATCAAATTAAGCAGGCAACAAATAATGAAATAGTAGCATTATTTAAAGAGTCTAAACCTTACTTTCATAGATTTCTTCTTGAAAGACTATCCTATATAAATCCTAGTATAAGCATACTTACAGATATTTTAAGTAGAGATGGAAACTCTGTACCTAGAGTTTCTTGGATTGAAACTTTGTACTATAAAGATTTAGAGAGATTACAGCAAAAGGCAAAAGAGTTATCTATTATAGAGAGAGACAGCGACAGCTTTTCTGAATATGAAGAGAAGATGCATATATACTACTCTTGT…
FTT0301	FLH150351.01X	FtCD00020341	AY774799		hypothetical protein	ATGGGAACTACGGTAGATGCTAGAATAAATATCATAATTGATAGTTTAAAGAATATTTCTAAAATTGAGTCAAATATACTTAGTTCTGCTGGTTATGATGCTTTTCTTGAAAAAATAAATGAATTCTTCAATAAGTATAAGTCTAATGATTCTTTCTTCAGCCTAATAAGAGAACAATTCGAAATCGAGGATATTGAAAAGATTGATTCTAATAAGCTAAGACAGTTATCAATAACACCATACGATATTCTTTATATCGTTGATAATCAGGATGTAAAAGAGATTGCTAAGTATTTTAGCTTGAGTAATAGAGGAAATATTAGAGCTAATATTATAGGTAGTTTTAATGACGCAACTGATAAGTTAATAGAAAATTATGACTTATTAGCTAATAGAGAT…
FTT0302	FLH150386.01X	FtCD00020343	AY774760		hypothetical membrane protein	ATGAAAAAAGTTTATGTTTTACTTGATTATTTCTTAAAAGTTTTATTCATGATATTGTTTTGTTTTGTTTTTGGAGTTTTCATAGGTGGCATTACGGTATATTTGCTGTCTTCTAAAGATATTTATAATATTCTACAGCCTCATGGATTTGTTTGGACATCTATATATGGAGCGATAAAAATATCAGGGTTTGGTGCTATGATTTTTGCAGTTATTTTTGCGCTATTTGATACCAACAAAAAGTTATTAGTAGCTCCGATGATAATTTCAATCGTAGTTTTATACTTTATTCAACATCTTATTGCTGCTGAGATATTATATTGTTTAAGTGCTTAG
FTT0303c	FLH152792.01X	FtCD00020568	DQ681551	lldD	L-lactate dehydrogenase	ATGGAATCTATTTTAACTAAAATCACATCGCTTGATGATATGCGTAAAGTTTATCATCGTAGAGTTCCTAAAATGTTCGTAGACTATTGTGAAGCTGGTTCATGGCAACAGCAAACCCTAAAATATAATCAACAAGATTTTGGCAATTATCTCTTTAGGCAAAAAGTTCTCACAGATATACAAAACCGCTCACTAAAAACCAAAATCCTAGGACAAGAGTATAAAATGCCTTTAGTATTTGCTCCAATAGGACTACTTGGAATGCAACATGCTGATGGTGAAATTCATGCTGCTAGAGCTGCTGAGAAATTTGGTATACCTTTTACCCTATCGACAATGTCTATCTGCTCTACAGAAGAAGTTGCTAAACATACAACTAAGCCATTCTGGTTTCAGTTG…
FTT0304c	FLH152604.01X	FtCD00020542	DQ681552	nfnB	Oxygen-insensitive NAD(P)H nitroreductase	ATGAATATAGTTGACTACGCTAAAAGCCGTTATACAACAAAAGCTTATGATCCAACAAAAAAACTGTCAAATGAACAAATACAGCAAATAAAAGATATCCTTAGATTTACACCATCAAGTGTAAACTCTCAACCTTGGCACTTTATCTTAGCAACTTCTGACCAAGCTAAAGCTAAAATTGCTAAAGCAGCTGAAAATATTCATCCCAAAAATGTAACAAACATTAAAGATTGTGCTTTAGTCATCGTATTTTGCCTAAAAACTGATATTGATGATGAATATCTAGAGCTACTTCTAAATCAAGAGCGTAAAGATGGTAGATTCCCTACTTCAGAATTTGAAAATATGCAAAGAGATGTGCGTAGAAAATTTGCTCTAGCATACAAAGATAAACCCCAA…
FTT0305	FLH152733.01X	FtCD00020560	AY774544		MutT/nudix family protein	ATGATAAAGACTTCAGCTTTGGTTTGTGTTAGGGATAATAAGATCCTTCTTGTAAGGGTGCGTGATAATACCGTTTGGTATTTTCCAGGTGGTAAGATAGATGCTGGAGAGTCACCCTTACAGGCTATTATTCGTGAGCTTAATGAGGAGCTAAATATCCAAATGCAGCAAACAGAACTAGACTATCTTGGTGAAGTTGTTACAGATAATCATGATAGGACAGATATTGTATCAGTGCATTGTTATGCTGGAGAAATTACTCAACGAATTATACCAGCTGCGGAGATATCAGCTATAAAATGGTTTGATTTAGATGATACTAAATTTATGGCTCTAGCTGTAATTGAGAGTATTGCTAGATGGTTTAAAAATCCTTAG
FTT0306	FLH152889.01X	FtCD00020580	DQ681553	fumC	fumarate hydratase, Class II	ATGCGTAGAGTAGAAACAGACAGTACTGGTCAAATAGAAGTTGATAATGACAAATATTGGGGTGCACAAACACAGCGATCTATAGAGCATTTTTCTATAGGCAGTGATTTGATGCCGATCGAAGTTATTAAAGCTTTGGCAATTATCAAAAAAGCTGCAGCTATCACAAACCATCAGTTAGGTATCTTAGCGCGAACTAAAAAAGAAATTATCATTAAAGTCGCAGATGAGATAATTGCAGGAGAACTTGATGAGCATTTTCCATTACGTGTTTTGATGACTGGAAGTGGTACACAATCAAATATGAATGTTAATGAAGTGATTTCAAATAGGGCTATTGAGCTTCTAGGTGGCAAAAAGGGGAGTAAAAATCCTATCCATCCAAATGATGATGTTAAT…
FTT0307	FLH152894.01X	FtCD00020581	AY774536	gltX	Glutamyl-tRNA synthetase	CTGATTACAACAAGATTTGCACCAAGTCCAACAGGGTTTTTACATGTTGGTGGAGTGCGTACTGCATTATTTAGCTGGTTATATGCCAAAAATAACAATGGTAAATTTATTCTAAGAATAGAAGATACTGATTTGGAGAGATCTACTCAAGAGGCGGTCGATGCTATTTTAGATGGAATGAGTTGGTTGGGGCTAAAAAATGATGGTGAGATCTACTATCAAACAAAGCGCTTTGATAGATATAAAGAAGTGATACAAGAACTTATTGCGGATGGTAAAGCTTACTACTGTAGCTGTTCTAAAGAAAGACTAGAAGAGTTAAGAGAGTATCAGCAAGCAAATAATCTTAAAACTGGCTATGATGGTAAATGTCGTGATGCAAACTATATTCCACAACAA…
FTT0308	FLH204760.01X	FtCD00022943	DQ681554		hypothetical protein	ATGCAAGTAATGAAAATTAGAAAATTAAGCCTAATTATGTCGGTTTTGTTGTTTGCTACTGCAATTTACGCGAATAACCATTTTGGTAATAACTTAGCTGGCTGCGGTTTAAACTTTGATCCAATAAATTTGCAAGATACAGCAAATTGGAAAGATAAATTAATCAAAAATGATGATCAAAGTAAACTAAAAACTATTCATAAGAGTATTCAATTTAATACTACTAAGCGTAATTATGTAATTTCACCTTTAGATATACAATTGGCAGATTCTTTGCCAGCTGTAGGTAAATGGATGATGGTAAATACAAGTAGTTACAACAAACCAAATTTACCTCAAGAAATTGCGGCAACTTGGGTATATTGGCGTGGAGCTAAAGATTTTGTTATCAATGGTGTA…
FTT0309c	FLH204801.01X	FtCD00022971	DQ681555	isftu2	Transposase	ATGAATTATCATATAAAAGAAGTATTCTGGTCAATTATTTTATCATTCTTAAAATCACAAAAAGGTATACATACCAATGATGAAGCCAAATTAAGATTGTTTATTGAAGCTGTATTTTATGTGTTACGTACAGGCTGTCAATGGAGAATGTTACCATTTTATTATGGTAAATATAGATCAATACATAAGCGTTTTAAAGATTGGTGTGATAAAGATATATTTTCTAGATTATTTAAATCAGTACAAAACCCTGATTTACAAGAAGTCATGCTTGATTCAACAATAGCAAGAGCACATGCTTGTGCTACGGGATATGATAAAGATGATAACCAAGCAATTGGTAGATCAGTTGGTAGGATAACCACTAAAATCCATGCTATGACTGATGCTTTAGGTAAT…
FTT0310	FLH157446.01X	FtCD00021118	DQ681556		amino acid permease	ATGTTTGCGGCGTATTATGCTTCAAAACAAGCCGGTTCAGCATCTGTAATATCTTGGTTAATTGGTGCAGGAATGGTTTTAATCTTGTCATTATTACTTGGTGAGGTCGCTTCATTTAGACCTGTTCGAGGGCTTTTTGGTAGGTTATTAACTATTAGTCATAATCCAGATATGGGGTTTGTAGTAGCAATTTCAAATTGGGTTGGATTACTCTTAACAATTCCATCAGAAGCCCAAGCAACAATTCAATATTTAAGCACGGCTTATCCAAAGATTGAGCCTTATATATTTACTAATCATAATCTTACTTATTTAGGCATATTATGTGTAGTGGTTTTAATATTTTTTTATGGTTTAATTAATTACTGGGGTGTTAAAACATTAACTAAGTTTACTAAT…
FTT0311c	FLH204756.01X	FtCD00022939	DQ681557		hypothetical protein	ATGTCAGCTCAAGTCTCAGATGCAGTCTTAATGGTCGATCCAGAATACTTTGCTTTAAATACTCAAAAAACAGACAGTGATGATGCTTTTAGAAGAGCAGTTAGATTAAATGAGAAAGCCATCCAAGCCTTAGCTCGTGATGAGTTCTATGAAATGGTCAATTACATAAGATCTAAAGATATAAAAGTGATTATCATGAAATCACCAAAAAATGCAGCTGATGCTGTATTTACAAATGACTGGCTATCTACACATATAATCAATGGTCAAGGTTATATTTTTATATATCCGATGTATTCAGAGAGTCGCAGATGTGAAATACAACCCCAACAACTCTTGCAAACTCTAGAGTCAGAACTTAAAATTAAATATAAACTTAAAGATTTTCGTGGCGATCAT…
FTT0312c	FLH204771.01X	FtCD00022953	DQ681558	folA	dihydrofolate reductase type I	ATGATCTCACTAATCGTTGCTTATGATAAAAACTTTGGTATAGGTAAAGAAAATACTCTAGCATGGAAACTATCAGAAGATCTTAAGAACTTTAAAAAAATAACAGAAAACAACTATATTGTTATGGGTAGAAAAACCTTTGAATCGATTGGTCGCCCACTACCGAATCGTAAAAATATTATTTTAACTAGAGACAAAGATTACAAACAAGATAAATGTTTAATAATAAATAGTACTCAGGATATTTTAAATTTTGCTGAATCAAAACCACACTACGAAATATTTATAATCGGTGGTGCACAGATCTATAAAGAATTTCTAAAATACGCAGATAGATTGTATATAACCGAAGTTGATGCAGAAATGACTGATCTTGATGCTTTCTTTCCACAATGGGAT…
FTT0313	FLH157166.01X	FtCD00021078	AY774368	rpsB	30S ribosomal protein S2	ATGTCTTTAATGAAAGAAATGTTATCGGTTGGTGTTCACTTCGGGCACAAAAAGGCTTTCTGGAATCCACAAATGAAAGAATACATCTTTGGTATTAATCATGGTGTACATATCATTAACCTAGAAAAAACAGTTCCGCTTTTCCAAGATGCGGTTAACTTTGTTGGTAAAACTGTTGCTAACGGTGGAAAAATTCTATTTGTTGGTACAAAAAGACAAGCACAAGATATCGTTGAAGCTGAAGCTAAAAGATGTGGTATGTCATTTGTAAGCCATAGATGGCTAGGTGGTATGCTTACTAACTACAAAACGGTTAGACAGTCTATCAAGAGATTGGCACAACTAGAAAAAATGAGAGAAGATGGTACTTTAGAATCTCTTACTAAAAAAGAGATGTTA…
FTT0314	FLH157310.01X	FtCD00021097	AY774137	tsf	protein chain elongation factor EF-Ts	ATGTCAAATATTTCTGCTAAATTAGTAAAAGAACTTAGAGAAAGAACTGGTGCAGGTATGATGGAGTGCAAAAAAGCTCTAGTTGCCGCTGCTGGTGATATTGAAAAAGCTGCTGAAGAAATGAGAATTTCTGGTCAAGCAAAGGCTGATAAGAAAGCTTCACGTGTTGCTGCTGAAGGTGTCATTGAAGTTTATGCTGCTGACGGTAGAGCTATTTTGCTTGAGATTAATTCAGAGACTGATTTCGTTGCTAGAGATGAGACTTTCAAGAAGTTTGCTCAAGAAGCTGTAAAAGCTGCTCATGCTGCTAATGCTAAGACTATCGAAGAAGTTTTGGCTGCTAAAACTTCAAATGGTGAAACTGTTGAAGAAGTTAGAAAATCACTAATTGCTAAAATT…
FTT0315	FLH204805.01X	FtCD00022974	DQ681559	pyrH	uridylate kinase	ATGTCTAATGATTCGTCAGAATGTTCTCAAAAACTCCCTAAACTTAAGAGAATTCTTCTTAAGTTAAGTGGAGAATCTTTATCTGCAGATCAGGGTTTTGGTATAAATGTTGAATCTGCTCAACCTATCATAAATCAGATTAAAACTCTTACTAATTTTGGTGTTGAGCTTGCTTTAGTGGTTGGCGGTGGTAATATTTTGCGTGGTGGTAGAGCTAATTTTGGTAACAAAATTAGAAGAGCTACTGCTGACTCAATGGGGATGATTGCTACTATGATTAATGCTTTAGCTCTTCGTGATATGCTTATTAGTGAAGGTGTTGATGCTGAGGTTTTTTCAGCAAAAGGAGTGGATGGGTTGTTGAAAGTTGCTAGTGCGCATGAATTTAATCAAGAACTT…
FTT0316	FLH204777.01X	FtCD00022954	DQ681560	frr	ribosome recycling factor	ATGATAAATGATATTCTAAAAGATGCTGAGAATAGAATGAAAAAATCATTAGAGGTTTTAGCTGATGATTTGGCAAAAATTAGAACTGGTAGAGCACAACCCGATCTATTAGCACATGTTACAATAGATTATTATGGTGTTGAGACGCCAATAACTCAAGCAGCTAATATTACTGTGCTTGATGCTAGAACTTTGGGGATTACTCCTTGGGAAAAAGGTTTATCGAGCAAGATTGAAAAAGCTATATTGACTTCTGATCTTGGGCTTAATCCTACTAACTTGGGTGATTCATTAAGAGTCCCTATGCCTGCTTTGAATGAGGAGAGAAGAAAAGAATTAGTTAAACTAGTTAAATCTGAAACTGAAGCGGGTAGGGTATCTATCAGAAATATTCGTCGT…
FTT0317	FLH157238.01X	FtCD00021087	AY774339	uppS	undecaprenyl pyrophosphate synthetase	ATGTTTATTCTTTCTTATCATTTAGCTAACTTAATTTTTTTCATAATATTTATGACATCGGCTAAAGAAAATATTCTAAGGCATCTTGCTATTATTATGGATGGTAATGGTCGGTGGGCAAAGAGTAGATTAAAGCCGAGAATATTTGGTCATAGAAATTCGGTCTCGAGTGTTGATGCAACTATAGAGTACTGTGTTGAGAATAATATAGAAATGCTTACTCTTTTTGCATTTGGTCGAGATAATTGGTTAAGACCAGCTCAAGAAGTCAGTGATCTTATGGATCTTTTTTATAAAACTCTAAAAGATAAAACTCCAAAGCTACATGATAATAATATTGTTGTTACTGTTGTTGGAGATCGCTCACGCTTGTCTAATAAGCTTATTGGTATGATTGAA…
FTT0318	FLH157265.01X	FtCD00021092	DQ681561	cdsA	phosphatidate cytidylyltransferase	ATGAAAGAAAGGATTGTGACTGGTATAGTTTTGGTCGCTGTGGTTTTTGGTTTTTTATTTTTTGCTTCTGACTATCTGTTTGGTGTTGGTGTATTTTTAGTTACTTTAGTATCAGCGTATGAATGGTTGAAACTTGCAAAAATTGATCAGCAGTCAATATTTAAAAATCTTATTATATTTACGATAGTGGTTTTTGTGGTTGCACAGTTTTTTATATATCTTCAATATATATTCCCAATATTTTGGTTGTATGCGATCTATAAATTAGCTAGTTATGAGCGTCAGAAAATCGATGCAATAGCAACTAATGAAATGCTTGTGATGGGCGTATTTACTATATCTCCTTTTGCTGCATCATTATATATACTACATACTAATGGTGTTGCATGGATATTTATG…
FTT0319	FLH157341.01X	FtCD00021102	DQ681562	dut	dUTP pyrophosphatase (Deoxyuridine 5'-triphosphate nucleotidohydrolase)	ATGGAGGTAGAGCTAAAAATTTTAAATAAAGAACTTATAAAAGAGTTACCCGGTTATGCGACTGAAGGTTCAGCAGCTATTGACTTAAGAGCATGTATCTCTGAGAGTATTTATCTTAAATCGGGTGAATGTAAACTTGTTGCAACTGGTATAGCTATTAATATTGCTAATCCAAATTATGCGGCAATGATTTTACCAAGATCTGGTTTGGGACATAAAAAAGGTTTGGTGCTAGGAAATGGTACGGGGCTTATAGATTCTGATTATCAAGGTGAGCTTATGGTTTCTTGTTTTAATCGCTCACAAGAGACTATTGAAATAGAACCGCTAATGAGATTCGCTCAGCTTGTAATTGTTCCTGTGGTACAAGCAAATTTTGAGATTGTTGAAGATTTTTCA…
FTT0320	FLH157458.01X	FtCD00021120	AY774373	pgsA	phosphatidylglycerophosphate synthetase	ATGTTTTTTAATATCCCTAATATTCTGACTTTTGGTCGTTTGATATTAATTCCTTTTATAGTTATATGTTATTATTTTGAGTTTCCACACCATCATGGTATTACGGCGACTTTATTTTTACTTGGGGCAGCAACTGATTGGTTGGATGGTTATTTGGCACGTAAATGGAAGCAAACTAGTAAGCTAGGTGCATTTTTAGATCCTGTTGCGGATAAGCTTATTGTTGCTACGGCGCTTTGTTTGTTTATAGAGATGTATCCATATTGGTGGGCAACAATACCTGCTATTGTGATGATTTGTAGAGAAATTGTTGTTTCAGCTTTGCGTGAATGGATGGCTGAACTCGGTCAGCGTAGTGTTGTTAAGGTTGGTGTTTGGGGTAAAGTGAAGACTGCAGCA…
FTT0321	FLH157258.01X	FtCD00021091	AY774366	rpsL	30S ribosomal protein S12	ATGGCAACTATAAATCAGTTGGTGAACAACCCTCGCAAGAGATCGGTTGTTAAGTCTAAAGTTCCTGCGTTAAAGGCGTGTCCTCAAAGAAGAGGGGTTTGTACTAGGGTTTATACTACAACTCCTAAGAAGCCTAACTCAGCACTTAGAAAAGTGGCTCGTGTAAGATTAACGAGTAGATTTGAAGTGACAAGCTATATTGGTGGTGAAGGTCACAACCTGCAAGAGCACAGTGTAGTGCTTATCAGGGGTGGTAGGGTAAAAGATTTGCCAGGTGTGCGTTACCACATTGTTAGGGGTGCTTTAGATACTTCAGGTGTTAATAATCGTAAGCACGGTCGTTCCAAGTATGGTACAAAGCGTCCTAAGTCTTAG
FTT0322	FLH157378.01X	FtCD00021108	AY774381	rpsG	30S ribosomal protein S7	ATGTCTAGAAGAAATAGAGCTCCTAAAAGAGATATTCTACCTGATCCTAAATATAAGAGTCAGGTTGTTGCTAAGTTTGTTAACCATATAATGCTAAGCGGGAAGAAATCGATAGCAGAAAAAATAGTATATGGTGCGTTTGATAAAATTAAAGCAAAAGATGCTTCAGCTAATGAAGTTGAAGTTTTTGAAAAAGCGTTGGAAAGTGTTAGCCCAATGGTGGAAGTTAAGTCTCGTCGTGTTGGTGGTGCTACATATCAAGTTCCTGTAGAAGTTAGACCAGAGCGTCGTCAGACTTTAGGTATGAGATGGATCATCGATGCTGCACGTAAGAGAAAAGAGAATACTATGGGTGATAGAGTGGCTGCTGAAATTCTCGAAGCTGTAGAGGGTAGAGGT…
FTT0323	FLH230034.01X	FtCD00039276	DQ681563	fusA	elongation factor G (EF-G)	ATGCCTCGTAATACGGCTTTAGAAAAATATAGAAATATTGGTATCTGTGCTCACGTTGATGCAGGTAAAACTACTACTACAGAGCGTATTTTGTTCTATACTGGTTTATCTCATAAGATTGGTGAAGTGCATGATGGTGCTGCTACTATGGACTGGATGGAGCAAGAGCAAGAAAGAGGTATTACAATTACTTCTGCTGCGACAACTACATTCTGGTCTGGTATGGATCAACAGTTTGAAAAACATCGTATTAACATTATTGACACTCCAGGCCACGTTGACTTTACGATTGAGGTTGAGCGTTCTTTACGTGTTCTAGATGGTGCGGTTGTGGTGTTCTGTGGTTCATCTGGCGTTGAGCCTCAGTCTGAGACTGTATGGCGCCAAGCTAACAAGTAC…
FTT0324	FLH157218.01X	FtCD00021085	AY774136	rpsJ	30S ribosomal protein S10	ATGGCTATAAATAATCAACGTATCAGAATTAGATTAAAAGCCTTTGATCATAAGCTTATTGATATTTCTACACAAGAAATTGTTGATACTGCTAAGAAAACAGGGGCTCAAGTTAAAGGACCTATTCCTTTACCAGTGCGTAAAGAGAGATTTACAATTCTTATTTCTCCGCACGTAAATAAGAAAGCAAGAGATCAATATGAGATTAGAACTCACAAGAGATTAATCGATATTGTTGAACCTACAGATAAAACTGTAGATGCGCTTATGAAGCTAGATTTAGCATCAGGTGTTGATGTTCAGATCAGTTTAAGCTAG
FTT0325	FLH157126.01X	FtCD00021074	AY774139	rplC	50S ribosomal protein L3	ATGTCTTTAGGATTAGTTGGTCGCAAATGTGGTATGACTCGTATTTTTACTGAAGATGGTGTTTCTATTCCTGTAACAGTAGTCCAAGTTGAGCCTAACAAGGTTACTCAAGTTAAGACTGTTGAAAAGGATGGTTATAATGCTATTCAAGTAACTACTGGTTTTAAAAAGCGTTCAAATGTAAATAAGCCTATGGCTGGTCACTATGCGAAAGCTAGTGTTGAGCCTGGTAGAGGTTTATGGGAGTTTACTGTTGATGCAGCAGCTGAATATCAAGTTGGTTCGTCTTTTGATGCTACTATGTTCGAAGCAGGGCAAAAAGTAGATGTAAGAGGTGTTTCAAAGGGTAAGGGTTTTCAAGGTGGTGTTAAGCGCCATAATTTTGCAACTCAAGATGCT…
FTT0326	FLH157110.01X	FtCD00021072	AY774330	rplD	50S ribosomal protein L4	ATGGACTTAAATTTAAAATCTTTGGCTGGTCAAGAGGCTGGATCTTTAGGTGTTGCGGAAGGTGTTTTTGCGGCAGACTATAATGAAGCCTTAATTCACCAGGTTGTTGTTGCCTATATGGCAGGCGCTCGTCAAGGTACAAAAGCTCAAAAAACTAGATCAGAAGTTTCTGGTGGCGGTGCTAAACCTTGGAGACAAAAAGGTACAGGTAGAGCAAGAGCGGGTACTATCCGTTCACCTATCTTCAGAAAAGGTGGTGTTACATTTGCAGCTAAGCCTAAGAGTTATAAGCAAAAAGTGAATCGTAAAATGTATTCAGGCGCAGTTAAGTCGATCTTATCTGAACTATTAAGATCAGGTAGAATGACTATTGTTGAAGAGTTGAAATTAGAAACTCCA…
FTT0327	FLH156189.01X	FtCD00020950	DQ681564	rplW	50S ribosomal protein L23	ATGAGTTCTCAAGAAAAATTATTAAAAACTGTTATAAGACCTCATGTTTCTGATAAAACTTACGGTCTTTCAGATGCAAATTCAACTATAGTATTCGAGGTGGCTAGATTTGCAAATAAGCAAGATGTTAAGAATGCTGTAGAGAAGCTATTTGAAGTTAAGGTTGAGTCAGTTAATATCCTTAATGTTAAGGGTAAGGCGCGTAGATTTGGTCGTGTTGAGGGTGGAACTAAGGCATGGAAAAAAGCTTATGTGAAGCTTGCTGAAGGACATGATATCAATTTTGTTGGTGCAGAGTAG
FTT0328	FLH156119.01X	FtCD00020942	AY774952	rplB	50S ribosomal protein L2	ATGATTCAAATAAAAAAAGCTAAACCTACTTCACCTGGTCGTCGCCCCGTAGTGAGCGTAAAGAATACAGAATTACATACAGGTAAGCCCTTTAAGGGTTTAGTAGAGGTAAAAAAAAGCAAGGCTGGTAGAAATAATACTGGTAGAATTACAGTTCGTCATCAGGGTGGTGGACATAAACAGCATTACCGTATAGTAGACTTTAAAAGAAATAAAGATGATATAACAGCTAAGGTTGAGAGAATCGAGTACGATCCTAACCGTAGTGCAAATATTGCTTTAGTTCTTTATGCTGATGGTGAGAGAAGATATATCGTTGCGCCTAAGGGTTTAAAGAAAGATATGTCTGTTATTTCAGGTGAAAAAGTAGATGTTGCTGTTGGTAACTGTATGCCTTTG…
FTT0329	FLH156155.01X	FtCD00020946	AY774960	rpsS	30S ribosomal protein S19	ATGCCTCGTTCATTAAAAAAAGGACCTTTTGTAGATCATCATCTTTTAAAGAAGGTTTTTGAAGCGCAAGAAAGTAATTCTAAAAAGCCAATCAAAACATGGTCAAGAAGATCAATGATTGTGCCAGATATGATAGGTTTAACTATAGCTGTACACAATGGTCAGCAGCATGTGCCTGTTCTTATGACTGAAGAAATGGTTGGTCATAAGTTAGGTGAGTTTGTTGTTACTCGTAACTACCGTGGTCATGCAGCTGATAAAAAAGCTAAGAAGAAATAG
FTT0330	FLH157989.01X	FtCD00021177	AY774506	rplV	50S ribosomal protein L22	ATGGAAGTACAAGCTAAATTAAAATTTGCAAGAATCTCAGCGCAGAAGTGTAGATTAGTTGCTGATCAGATCAGGGGTCTGCCAGTAGAGCAAGCTATTAATCTTTTGACATTTAGTAATAAGAAAGCTGCTGTATTAATTAAGGGAGTTTTGAACTCTGCAGTAGCTAACGCTGAACACAATGATGGTATGGATGTTGACTCTTTAGTAGTGTCGACTATCTTCGTTGATGAAGGTCCTACAATGAAGCGTTTTGAAGCTAGAGCAAAAGGTCGTGGTAATCGTATTCTAAAAAGAACTTCACATATAACTGTGAAAGTTGCTGAGAAAAAATAG
FTT0331	FLH204787.01X	FtCD00022960	DQ681565	rpsC	30S ribosomal protein S3	ATGGGTCAAAAAGTAAATCCTAATGGTATCCGCTTAGGTTATATAAGAGACTGGCGTTCAACGTGGTATGCTGACTCTTCTAGATATGCTACTAAACTTAATGAAGATATTAAGGTTAGAGAGTTTTTGCATAAAAAACTTGCAGCAGCAGCAGTTAGTAAGATTCAGATTGAGAGACCTGCTCAAAATGCTAAAATTACAATTCATACAGCTAGATCTGGTATTGTAATTGGTAAAAAAGGTGAAGATGTTGAGAAGTTACGTGCTGAAGTTCACAAGCTGATGGGTATTCCAGTTCAGATAAATATTGAAGAGGTGCGTAAGCCAGAAATCGATGCTAAATTAGTTGCTGAAAGTGTTGCTCAACAGTTAGAGAAAAGAGTAATGTTTAGAAGAGCG…
FTT0332	FLH204757.01X	FtCD00022940	DQ681566	rplP	50S ribosomal protein L16	ATGCTACAGCCTAAGCGTACAAAGTTTCGTAAACAGCAGAAGTTGCGTAATAGAGGCTTAGCTCACAGAGGTAATAAAGTAAGCTTTGGTGAGTTTGGTCTTCAAGCGACATCTAGAGGTAGAATCACTGCTAGACAAATCGAGGCAGGAAGAAGAGCGATTAGCCGTCACATTAAGCGTGGTGGTAAAATTTGGATTAGAATCTTCCCAGACAAACCTATAACACAGAAGCCTCTTGAAGTTCGTATGGGTAAAGGTAAAGGTTCAGTTGAATATTGGGTTGCTCAAATTCAGCCGGGTCGTGTACTATATGAGATCACTGGTGTTAAAGAAGAATTAGCGCGTGAAGCTTTTGCTAGAGCAGCTGCTAAGATGCCAGTGCAGACAACTTTTGTTGAA…
FTT0333	FLH204731.01X	FtCD00022923	DQ681567	rpmC	50S ribosomal protein L29	ATGAAAAGAAAAGATACTTTAAAAGATTATAGAGGTAAAAGTATTGACCAATTGCAAGAAGCGAAAATAGAGTTATTGCAACAGTTATTTTCTCTTCGCATGCAGAAGGGTACAGGGCAATTAAAGAAAAATCACTTGTTCAAAAGTGCTAAAAGGGATATTGCTCGTATTAATACAATAATATCAGAAAAGAATAAATAG
FTT0334	FLH157187.01X	FtCD00021079	DQ681568	rpsQ	30S ribosomal protein S17	ATGAGCGATAAAATTAGATTGTTAGAAGGTAAAGTTTCTAGCGTAGCTATGGATAAAACTGTAGTTGTAAGAGCTGAAAGATATGTTAAGCACCCTTTGTATGGTAAGTTCGTTAAGAAAACCACAAAGTATTATGTTCATGATGAAAATAATGAATGTAAAGAAGGTGATGTTATCAAGTTCAAAGAAACTAGACCATACTCAAAAACTAAGAAGTGGTGTTTAGTCGATATTATCCATAGAGAAAAATAG
FTT0335	FLH157243.01X	FtCD00021088	DQ681569	rplN	50S ribosomal protein L14	ATGTTTCAAATGCAAACAGAACTCCAAGTTGCTGATAATAGTGGCGCTAAGAGAGTAGAGTGTATAAAAGTTTTGGGTGGTTCTCATCGCAGATATGCATCTATAGGAGATGTTATCAAAGTAACTGTGAAAGAAGCTTCTCCAAGAGGTAAGGCTAAAAAAGGATCTGTATATAATGCTGTTGTTGTTAGGACAGCTAAAGGTGTACGTAGAAAAGATGGTTCTAAAGTTCGTTTTGATGGCAATGCTGCCGTGCTTCTAAATGCTAACGGACAACCGATTGGGACTCGTATCTTTGGCCCTGTTACTAGGGAGCTTCGTACTGAGAAGTTTATGAAGATCGTATCATCAGCACCAGAAGTATTATAG
FTT0336	FLH157210.01X	FtCD00021083	DQ681570	rplX	50S ribosomal protein L24	ATGAATAGATTAAAAAAAGGCGATGATGTAATAGTTATCGCTGGTAAAGATAAAGGACGCAGAGGTGTTGTTAAGTCATTCGCTAAAGGCGGTTCTTTAGTTTTGGTTGAGGGTATAAATATTGTTAAAAAACATATTAAGCCTAACCCAAATAGAGGTATCGAAGATGGAGTTGTTGAGAAAGAGCTTCCTGTTGATGCGTCTAACGTTGCTATCTTTAACCCAGCTACTGAAAAAGCAGATAGAGTGGGTTATAAGTTTGTTGATGAGAAAAAGGTTCGCTATTTTAAGTCTAATGGCGAGCTTGTAGACTTATAG
FTT0337	FLH157435.01X	FtCD00021116	DQ681571	rplE	50S ribosomal protein L5	ATGGCAAGATTAAAAGATTATTATCAAAAAGAGCTTGTTGCTAAGTTAAAGACTGAGCTTGGCTTAGATAATATAATGGAAGTACCTACTATTAAGAAAATTACTCTTAATATGGGTGTGGGTGATGCTGCAAAAGATAAGAAGATTATGACTTTTGCATTAAATGATTTGACAGCTATTGCTGGTCAAAAGCCAGTTGTTACTAAGTCTAAAAAATCAATTGCTGGTTTTAAAATTCGTGATGGATGGCCTATTGGTGCTAAAGTTACGCTACGTGGCGATCGTATGTATGAATTTTTAGATAGACTTATAACAATTGCTATTCCTAGAATTAGAGATTTTAGGGGGTTAAGTGCTAAATCTTTTGATGGAAGAGGTAATTATAGCTTGGGTATGAGA…
FTT0338	FLH157202.01X	FtCD00021082	AY774326	rpsN	30S ribosomal protein S14	ATGGCAAAAAAATCAATGATTCAGAGAGAATTAAAGAGAGAAAAATTAGTAGCTAAATATGCTCAAAAAAGAGCTGAGTTTAAGGCTATTATTCTTGATATAAATTCTACTGAAGAACAAATATGGGAAGCTCAAATTAAACTGCAAAAGTTACCAGTAAACTCATCAGCTTCTAGAGTTCAAAGAAGATGTAAGGTTACAGGTAGACCACATGCTGTATACAGAAAATTCGGCTTATGTCGTAATAAGCTTAGAGAGTATGCAATGGCAGGTGATGTTCCTGGTTTGAAGAAGGCTAGTTGGTAG
FTT0339	FLH157290.01X	FtCD00021095	AY774384	rpsH	30S ribosomal protein S8	ATGAGTATGCAAGATCCTATCGCGGATATGTTTACAAGAATCAGAAACGGACTTTCTGCTGAAAAAGAATTTGTTTCTGTACCATTTTCAAAGATAAAAATGGAAATCGCGAACTTTTTAGTTAACGAAGGTTATATTAAAAGTTGTTCAAAAGGTACAACTTCAATGGGTCATCCTTCTATTGAAGTAGAGCTTAAGTATCATGCAGGTGCTCCTGTTATTGAAATGATCAAAAGAGTTTCTAGACCAAGTTTGAGAATCTATAAGTCACACGCAGACCTACCTAAGGTATATGGTGGTTATGGTGTTGCTATTGTTTCTACATCAAAAGGTTTAGTAAGCGATAGAAAGGCTAGAGATCTTGGTGTTGGTGGCGAAATAATTGGCTACGTAGCTTAG
FTT0340	FLH157418.01X	FtCD00021114	AY774332	rplF	50S ribosomal protein L6	ATGTCAAGAATAGGTAAAACACCTGTTGTTATCCCAAGCGGTGTTACGATTAATGTTGCTGCTGGTAACAAGGTTGAAGTTAAAGGTGCAAAAGCAACTTTAAGTAAAACTTTTTCTACTGATGTGACTTTTAGTGTTGCTGATAATGTTGCGACTATAACGCCAAATAATAACAGCAAAAATGCTGTTGCACAGTCTGGTACTGCAAGAGCAATACTTAGCAATATGGTTGAAGGTGTTAGTAAGGGCTTTGAGAGAAAGCTAAAAATTATTGGTGTTGGTTATCGTGCTAAAGCACAAGGTAACGAGCTTAATCTTACTTTAGGCTTCTCACATCCTGTAGTTTACAAGTTGCCACAAGGTATAACAGCTGAAACTCCAGCTCCTACAGAAATTATT…
FTT0341	FLH156849.01X	FtCD00021037	AY774278	rplR	50S ribosomal protein L18	ATGGATATAGAAACTGCTCGTTTAAGTCGTAGTAAGCGTACTAGAATTAAACTAAGAGAGCTTGGTCATACTAGACTTTGTGTTTATAGAACACCAAGACACGTTTATGCGCAGGTGATTTCTGGTGATGGTTCTACTGTATTAGTAGCTGCATCTACTGTAGAAAAAGATGTTAAAGCAAAATGTAAATATACAGGTAATGTTGAGTCTGCTGCAATTGTAGGTGAAATCATTGCTGACAGATGTAAAGAAAAGGGTATTTCACAGGTTGCTTTTGATAGATCTGGATATAAGTATCATGGACGTGTTAAAGCTTTAGTAGAAGCTGCTAGAGAGCATGGTCTTCAGTTTTAG
FTT0342	FLH204769.01X	FtCD00022952	DQ681572	rpsE	30S ribosomal protein S5	ATGTCTAATGAAGTGAAAAAAAACGAAGAGCTGATTGAAAAGTTAGTTAGTGTTAAAAGACACTCAAAAACAGTAAAAGGTGGTAGAATTATGAGCTTTGCTGCTTTAACTGTTGTGGGTGATGGTAAAGGTAGAATTGGTGTTGGTAGAGGTAAATCAAGAGAAGTGCCTGCTGCTATCCAAAAAGCTATGGAAAACGCTAAAAAGAACATGGTATCAGTAAACTTAAATAATGATACTTTATGGTACCCTGTGATGTCTAACCATGGTGCTTCTAAAGTATTCATGCAACCAGCATCTGCAGGTACTGGTATTATTGCTGGTGGTGCTATGCGTTCTGTTTTTGAAGCAGTTGGTGTACACAACGTTTTAGCAAAAACATACGGCTCAACTAATCCA…
FTT0343	FLH156777.01X	FtCD00021026	AY774287	rpmD	50S ribosomal protein L30	ATGACTCAAGCTAAAACATTTAAAGTTACTTTAGTAAAAAGCCTAATTGGTCGTAAAGAAAACCACATAGCTTCAGCTAGAGGTTTGGGCCTAAGAAAAATTAACCACTCTGTAGAAGTATTAGATACTCCTGAGAATCGTGGTATGGCTAACAAGATATATTATATGGTTAAGATAGAGGGGTAG
FTT0344	FLH156960.01X	FtCD00021051	DQ681573	rplO	50S ribosomal protein L15	ATGAAATTAAATACACTTGCTCCTGCTGCTGGCTCAAAAAGCGCTCCAAAAAGACTAGGTCGTGGTATCGGAAGTGGTTTAGGTAAAACTTCTGGTAAGGGTCACAAAGGTCAAAAAGCGCGCTCAGGTGGCTATCATAAAGTAGGTTTTGAAGGCGGACAAATGCCTTTACAAAGAAGACTACCAAAATTTGGTTTTACTTCTGCATCTAAAGGATATGTTGCTGAAATCAGACTTCATGAATTAAATAATGTGGTAGCTGATGAAGTCACATTAGATACCCTAAAAGATTTTGGTCTTATTAGAAAAGATATCAAGACAGTAAAAGTAATAGCTAGTGGAGAAATCCAAAAAGCTGTTAGCCTAAAAGGTATAGCTTGTACAAAAGGTGCAAAAGAA…
FTT0345	FLH157051.01X	FtCD00021066	DQ681574	secY	preprotein translocase, subunit Y, membrane protein	ATGTCAAAGTATAATAGTGCTTCTGGTACAACAGGTGAATTAAAATCTAGACTGATTTTTGTAGTCATTGCTATCTTGGTATTTAGACTCGGAGTTTATATTCCTATACCAAATATAGATCCTACTAAGTTGGTAGAGATTATTTCAAATCAACACTCATCAACCGGTGGTTTGATGAGTATGTTTAATATGTTCTCTGGTGGCGCTCTTACTCAAATGAGTATCTTTGCATTGGGTGTGATGCCTTATATTTCGGCATCATTTATTTTTCAGATGCTTTCAGCTGTATATCCAAAATTTATAGAGCTAAAAAAAGAAGGTGAGTCTGGTCAAAAGAAAATCACTCAATATACAAGATATTTAACTCTTGCTTTGGCTATAGTACAATCATTTGGTATT…
FTT0346	FLH156753.01X	FtCD00021021	DQ681575	rpmJ	50S ribosomal protein L36	ATGAAAGTTAGAGCTTCAGTTAAAAAAATGTGTAGAAACTGTAAAGTTATCAAGCGCAATAGAGTAGTTCGTGTGATATGTACAGATCCTAGACATAAGCAAAGACAAGGATAG
FTT0347	FLH156857.01X	FtCD00021038	DQ681576	rpsM	30S ribosomal protein S13	ATGGCTCGTATAGCTGGTGTTAATATTCCTGTTCATAAGCATACAGTGATAGGATTAACTTCAATTTATGGAATAGGTAAAACAAGAGCGCAACAAATTTGCCAAACTTGCAATGTAGATCCAACTGTCAAAATTAAAGATTTATCAGAAGAACAAGTTGAATCTTTAAGAACAGAGGTTGCTAAATTTACGGTAGAAGGTGATTTACGCCGTGAAGTTTCTATGGACATAAAAAGACTTATGGACTTAGGATGCTTCAGAGGTAGAAGACATCGTCGTAGCCTTCCTGTAAGAGGACAAAGAACGAAGACTAATGCACGTACTCGTAAGGGTCCAAGAAAGCCAATTAAGGCGTAG
FTT0348	FLH156889.01X	FtCD00021042	AY774302	rpsK	30S ribosomal protein S11	ATGGCTAAGTCTGTTAGATCATCAAAGAAAAAAGTAAAAAGAGTAGTGACTGATGCAGTTGCTCATATTTACTCATCTTTTAATAACACTATAGTAACTATTACAGATAGACAAGGTAATGCTTTATCTTGGGCGACTTCTGGTGGTAGTGGCTTTAGAGGTTCGAGAAAAAGTACACCTTTTGCTGCGCAGGTAGCTGCTGAGAGAGCTGCTGATATGGCTCTTGAGTATGGTGTAAAAAACGTAGATGTTTTAGTAAAAGGACCAGGTTCAGGTAGAGATTCTGCTGTTAGAGCTTTGAATGCTAAAAACTTAAAAGTAACAAGCATAACAGATGTGACTCCATTACCTCACAATGGTTGCCGTCCTCCTAAGAAACGTCGTGTTTAG
FTT0349	FLH157072.01X	FtCD00021070	AY774305	rpsD	30S ribosomal protein S4	ATGGCTAGATATCTAGGACCAAAATGTAAGCTTTCTAGAAGAGAAGGTACTGACTTATTTTTAAAAAGTGGTGTAAAAGCTAACGATGAAAAATGCAAAATGAATACTGCACCAGGTCAACATGGAGCAAGAAGAGCGCGCCTATCTGACTATGGTTTACAGTTAAGAGAAAAGCAAAAAGTTCGTCGTATGTATGGTATTTTAGAAGGTCAATTTAAAAAATACTATGTCGAAGCTAGCAGAAGAAAAGGTAATACCGGTGCTACATTGTTAGAGCTATTAGAATCAAGACTAGACAATGTTGTTTATAGAATGGGTTTTGCTGCTACACGTGCAGAAGCAAGACAACTGGTAGTTCACAAAGGTATCATGGTGAATGGTCATACTTGTAACGTGCCA…
FTT0350	FLH204758.01X	FtCD00022941	DQ681577	rpoA1	DNA-directed RNA polymerase, alpha subunit	ATGAGTAATAATAATTCAAAACTGGAATTTGTACCTAATATACAGCTTAAAGAAGACTTAGGAGCTTTTAGCTATAAAGTCCAACTTTCTCCTGTAGAAAAAGGTATGGCTCATATCCTTGGTAACTCTATTAGAAGGGTTTTATTATCTTCACTATCAGGTGCATCTATAATTAAAGTAAACATCGCTAATGTACTACATGAGTATTCTACTTTAGAAGATGTAAAAGAAGATGTTGTTGAAATTGTTTCTAATTTGAAAAAGGTTGCGATAAAGCTTGATACAGGTATAGATAGACTAGATTTAGAACTATCTGTAAATAAATCAGGTGTAGTTAGCGCTGGAGATTTTAAGACGACTCAAGGTGTAGAAATAATAAATAAAGATCAGCCAATAGCT…
FTT0351	FLH156967.01X	FtCD00021053	AY774291	rplQ	50S ribosomal protein L17	ATGAGACATCGTAAGCAAGGTAGAAAGTTCGGTAGAACTAGTAGTCATAGAAAAGCTATGTTTAAGAACATGTCAGCTTCTTTGATTAATCATGAGCTTATCAAAACCACTTTACCAAAAGCTAAAGAGTTAAGAGCAATCGTTGAGCCTCTAGTAACTTTAGCTAAGAGAGAGCATAAGTTAAGACAAGAACTAGACACTAACTCAAATGAGTTCAAAGCACAATCAGTTGCTTTAAGAAGACAAGCTTTTGATTTCTTAAGAAATAAAGCTGCTGTAACTAAACTTTTTGAAGAGTTTGGTGCTCGTTATGCAGAAAGAGCTGGTGGTTATACTAGGATTCTTAAATGTGGTTATAGATTCGGTGATAAAGCGCCTATGGCTTTCATCGAATTAGTT…
FTT0354	FLH204768.01X	FtCD00022951	DQ681579		hypothetical protein	ATGTATTTAAATAAAGTACACTACATATGGATGGGATCATTAATCCCAGATAAATATATAAATAATATTTTTTACTTACTATCCCAATCGGATCATTACATTAATATATGGACAGATAGACCAGAAGAAACTAGATTGAAATTTTTAGATAAAATAGGAGGATATAGTCATTTACAAAGAAATAAAATTACCAATAGACTAGAATTTAAACAAATTTTTGAATTAGAGAATTGGTGTCAAATCAATCTAAGTAATTATTTAACACTTATTCAGATGAAGACTCTCTTGGAAACTTTTATGTTCGAATATCCTAATTATTCAGATAGATATAATAAATACAGCCTAGAAGTACTATATAAGTTAGGCAATTTAGCAACACTAAGTGATATATTAAGATTA…
FTT0356	FLH151716.01X	FtCD00020503	DQ681580	htpG	Chaperone Hsp90, heat shock protein HtpG	ATGTCAGAAAAAAAATATACTTTTGAAACTGAGGTAGATAAATTACTTCATCTTGTAATTCACTCACTATATTCAAACCGTGAGATATTTTTAAGAGAACTTGTATCTAATAGTTCTGATGCTATCGAGAAATTAAGATATGAGAGTATTTCAAACGCAGCTTTAAACGAAGATGATACTGATTATGCTATCAGAATTGATTTTGATAAAGATGCAAAAACTATAACAGTTAGCGATAATGGTATCGGTATGACTGAAGAAGAAGTCATCGAAAATCTCGGCACAATTGCTAAGTCAGGGACTAAGAAATTCTTAGAAAGTTTAACTGGTGATAAGAGCAAAGATAACGAGCTGATTGGTCAGTTTGGAGTTGGTTTTTATTCATCATTTATAGTTGCT…
FTT0359	FLH154089.01X	FtCD00020717	AY774617		hypothetical protein	ATGAAAATTCCAGCTGAGAAAGAGTTTGCAATAAAAAAAGCGATTCTAAAAGCAATTGAACATGGTTATAGTCCAGCTCAGCTAGCAGATAGTTTTGGTGTATCTAAAAGCTTAATCTATAAGTATCGTAGAGCACTTAGAGATCAAGGTTTCATAAGAAAAAATGAAAATGATATGTATGTCATAACACAAAATAAGTTTTCTATCAAACCAAGAATACCTGAATCTGGAAAACTTGATTTAGATAATGATATTAAAGATCAGCCACAACCAAATCTACAAGCCAGCAACCAAGAGCTCGAACAACCTATTATAGATGAACCTAAACCTGATGTCAGTCGTACTGAAATAAAACTTCAAGAAAAACTACAACAAATCAGAGAAATTCAATTACAGCAA…
FTT0360	FLH153907.01X	FtCD00020695	DQ681581		Short-chain dehydrogenase/reductase	ATGGTAAACAATAGTAAAACTATCCTTATAACTGGTTGTTCTCATGGTGGTATAGGTTACGCTACTGCTGTACATCTTAAAAATTTAGGTCACAGAGTTTTTGCTTCAGCAAGACAGCAAAAAGATGTAGAAGCACTTAGTCAAGAAGGCTTCGAAACTTATCTTATAGATGTAACTAACTATGAGTATATCGATAATGCTTTAGCTGATATCTTAAATAAAACTGGTGGCTCTCTAGATGTAATATTTAATAATGCTGGATATGGTCAGGCCGGTGCTTTAGAAGATATTGATACTAAGTTTCTCAAACAACAATTTGAAACAAATGTATTTGGATTACACAACTTAACATACAAAGCTCTAAAAATAATGCGAAAACAAGGTTATGGTAAAATCATC…
FTT0361c	FLH154141.01X	FtCD00020724	DQ681582		amino acid transporter	ATGGATATAAATTCTAATCAAGATCAAGTTCTAGGTTTTAAAGATGTTACAATCACGGCTGTAACAGCTAATTTTGGTATTCGCTGGATACCTGTAGCAGCTTGGTTGGGAGCTTCAGCAATATTCTTTTGGATACTTGGGGCGGTGATGTTTTTCTTGCCTTTGGTCATAATTGCAGTTCAGTTATCAAGAAAACATCCTGATGAAGGTGGTATTTATTCATGGACTGTTAGAGCCTTAGGACAAAAGGCGGGTTTTATGGTGGCATGGTTATACTGGGTGAATACGATTTTTTATTATCCAGCTGTACTTATCTTTTTAGCTACTAAATTTGCATATTTTATAGGTCGACCTGATTTGGTTGATAATCATTATTATATAACGATAGTTGTTTTAGTG…
FTT0362c	FLH153936.01X	FtCD00020699	AY774640		hypothetical protein	ATGAAAAAAATACTATTAGGTTTTACATTACTTTCTGGAGTTGTTTTTGCTAGTGATGAACTAAAGTTAAAAATAAAACTACATACTAATACACAAGAGCAAAATATTCTTATGCCGCCGAATAGGTATATTTCGGATAATATTAGTTGCCCACAAGGTAAATCTTGGATACAAGAACTAGGACAAAATGTATTTACTGCAAATGTACCTTTAATCTCGACGTATGACCCAGAGTCATTTGGTTTATTGTGGCCTGCACTATCGCTGCATAAAAGGGTAGGTGATACTAGTTTATATTTTGTGGTGCAGCAGAAAATAGATAGGGAGCTAACGACAGGACCAGAAGATAATATCACGGTAAAATATCATGCATTAATAGCCGATGGTATTAATACTGGA…
FTT0364c	FLH157346.01X	FtCD00021103	AY774364		hypothetical protein	ATGAAGAAAATAATTATAGTAATAGCCTCTATGCTAATTGCTTTGACAGCAAATGCAACAGGGGATTGTAGTAACAAAAGTTTTAATGATATAAAAAGTAAGGCTAGACAAATGGAGCAAGCTTGGGATTCAGCTGATGTTGAAAAAGTAGTTTCGTTTTATGCTGATGATTTTATATACATGAGTGGTGGTAAGCCTTATACAACTAAAAATGCTGTACTAAAACATTATGTCGATGGATTTGCTGCAAACAGCTCTGGTAAGAGAGATATGGGTAAACTTAAGCTTAATTATCAATATTGTAGAAATCTTGATCAAAATTATCAGTTAGTCATACTAAAGTTTATTTGGACAAGTTCGGATGGTAAGGTTGCCTCAGGTCATGACTTACTTGTTTGG…
FTT0365	FLH204795.01X	FtCD00022966	DQ681583	poxF	phenol hydroxylase	ATGGCACTAGAAAAATTTGAACTTGAATTAGTATCTTTTAAAGATATTACTGATAAGGTTAGACACTTTGTTTTCAAAAGAACAGATGGTAAGCCTCTTGATTTTATTGCGGGACAATTTATTACGTTTCTGCTCACAGATGAAGATGGTAATATAAAGCGTAGAAGCTACAGTTTAGGATCATTACCTGCTGATAATATGCTTTTAGAGATAGGTATGACTTATGTTGAGGGCGGTATCGCCACAGATACTTTTTTTAATATGAAAGTTGGTGATACAGCAGCTGCGATGGGACCAGCTGGTAGATTAGTACTAAAAAAAGATGAAGAAATCAGAAAACTAATTTTAGTTGGTACTGGTACTGGTATTGTTCCATACAGAGCGATGTTCCCAGAACTA…
FTT0366	FLH231488.01X	FtCD00039376	DQ681584	rpmE	50S ribosomal protein L31	ATGAGACAAGAAATTCACCCTAAATATACAGAAGTAACTGTAACTTGTAGCTGTGGCAATACTTTCGTTACAAGATCAACAGCTGGAAAAAAAGAAATGAACATCGATATCTGTTCAGAATGTCACCCATTCTATACTGGTAAGCAAAGAATCGTTGACACTGCTGGACGTGTTGATAAGTTCAAGAAGAGATTTGGCGGCATGAAAAAAATATAG
FTT0367c	FLH157455.01X	FtCD00021119	DQ681585	gshA	Glutamate--cysteine ligase	ATGTACGATTTCAAAAAAATAGATAACCTACGCGGGATAGAAAGAGAAACTTTAAGAGTTACTGATTGTGGTAATCTAGCAACTTCTAATCACCCTGATGGTTTAGGACATAAGTTGACTAATAATAGTATTACCGTTGATTTCTCTGAAAATTTGCTTGAGCTGATAACTAAACCGCATGATAGTATAGATAAAGCAATCGGTGAGCTATATCAACTTTCGGCATTTACTTTGGATAATATGCACAGTGATGAAATTATCCTTAATACTAGTATGCCACTATCTGCTAACGATAATGATATACAGGAAGCAGATTTTGGGAGCTCAAATTCGGGGCGAATGAAGCGTGTTTACCGTAAAGGGCTATCTGCACGATATGGTAAAATTATGCAGATAATT…
FTT0368c	FLH204796.01X	FtCD00022967	DQ681586	mviN	virulence factor MviN	ATGCAAAAATTCTTCTCAAATAGTTTAATCGTTTCTATCTTTTTGTTTTTATCAAAACTTCTTGGCTTTGTTAGGGATTTATTATTAGCAAGCTTTTTTGGCAGCGGAGCTGCTTTGCAGGCATTTTTAGTGGCTTTTAGATTTCCTGAGTTTATCCGTAAGGTAACCTCTTCAGGAACACTAACACAGATTATAAACCCATATCTAAATGGTAGCATTAATCAAAGAAATAACAAATTCATTATAACGATCTTATATTTTATAGCTTTGTTTTTGCTTATTGTTACGTTCTTGGCGATAGTATTTAGTAATATTTGGGTTGGTATTTATGCTTATGGTTTTGTTGATGAAACTAGTGTTTTAGTATTGGTAAAAAGCATGTTTGTAATAATGATACCG…
FTT0369c	FLH156939.01X	FtCD00021048	DQ681587		hypothetical protein	ATGAAAGCTAAATTTATAATTGCTTTTTTATCAATATTGTTTTTTAGTTCATCATATGCAACTTTGGAGCAATGTTATAAAGATGGTGTAAATCAAGATTATGAGAAAGTTTTGGAGTCTTGTAAACCATACTTGAAAACTGATGCACGTGCCACTGGTCTTCTAGCAGAGGCAAATATTCAGCTTGATTCAAGTGATAAATTAGCTCTAGAGGATGCGTTATGGGCAGTAAATTTTTATCAAAAAAATGGTGCTCCAAAAGATCCAGAAGGTGCTAGATCGTATTCTTATTTAGTATATCTGATTGGTGAGTTATATTTCTTTGGTTCTGACGATATTAAGGTAGATCAAAAAAAAGGTATAGAATATATTATAAAATCAGCTAATTTGGGCTATGAT…
FTT0370c	FLH156930.01X	FtCD00021047	DQ681588	yjeE	Nucleotide-binding protein, yjeE	ATGGAAAGTATACTAGTAAATGATGAAGAGCAAATGTATCAACTTGCCAAAGAGTATTCTCAACAGCTAAAGCCTGGTCAGATTATCTATTTGTATGGTGATTTAGGTGCGGGTAAAACTACGTTTGTCAAAGGTATACTCAATGCACTTGGTTATACTGGTAACGTTAAAAGTCCCACTTATACTCTAGTTGAGAGTTATGAGTTTGACAAATTTGATATTTATCATTTTGACTTATATAGGTTGGCTGACCCAGAAGAGTTAGAATGGATAGGTGCACGTGATTATTTCAATCAAAAAGATATTTGTTTTATTGAGTGGCCTGAGAAAGGTAAAGGTTTTTTACCATTAAATACCACTAAGGTACATATAAAATATCTAGCTCAAGGTAGACAAGTA…
FTT0371c	FLH204782.01X	FtCD00022956	DQ681589	folC	FolC Bifunctional protein	ATGAGCGTCGAAATTAAAATAGCTAAATTAATGGCTAAGCCTGATGCTCTCTATTGCGATCTTCTTGATTTATCACTAATTCTTAGTAGATTTAATTTTGCTAAAAAGTTTAAAGTCATAACTATAGCTGGTACTAATGGTAAAGGTACGACAGTAGCTATGTTAGAAGAGCTTTTAGTAACTAATAATAAGAATGTTTTAAGTCACACTTCACCACACGTTTTTAAATTTAATGAAAGAATATCATTAAACAAACAGCCAATATGTGATAGTGTTCTTTTGGAGATTTTAGAAAGATTAGAAGAATTGGCTCCTGAATATCGTCTCTCATATTATCAAATTGCTTTTTTATGCCTTTGTATCTATTCGCAAAGAGTTGAGCTTGATTATCTAATTTTA…
FTT0372c	FLH204754.01X	FtCD00022937	DQ681590	accD	Acetyl-CoA carboxylase beta subunit	ATGGAAATGAGTTGGTTAACTAGAGTAATTGGTAGAAGTCTTGGTTTAGAAGCGCAGAAAAAAGATATGCCATCTGGAGTTTGGAGTCAGTGTCCTAATTGTGGTGTAACTCTATATTCAGAAGAGCTACATAACAATAAGTCAGTATGTCCAAGCTGTAATTACCACTATAGAATTTCTGCTAGAAATAGACTAAACCTATTCTTTGATAGAGATAGTATGCAAGAGCATTTTGCAAATGTATCGCCTGTTGATATGCTTAAGTTTAAAGATACAAAAACTTATAAGGATAGATTAGCTCAGGCACAGAAAAAAACTGAAGAGCAAGATGCTTTAGTGGTAATGGAAGGAACAGTTAAAGGATTTCCTGTAGTTGCAGCAGCATTTAACTTTATGTTC…
FTT0373c	FLH157325.01X	FtCD00021099	DQ681591	ndk	nucleoside diphosphate kinase	ATGACTAAACAAAGAACTTTATCTATAATTAAGCCAGATGCTGTAGAGAAAAATGTAATTGGTGAGATCTATAGCCGTTTTGAGAAAGCAGGATTAAGAATTATTGCAGCTAAAATGAAGCATTTGTCAAAAGCAGAAGCTGAAAGATTTTATGCAGTACATAAAGATAGACCTTTTTTTAGTGCGCTTGTTGAGTTTATGATTTCAGGTCCTGTGATGATACAAGTTTTAGAAGGTGAAAATGCAATAGCAAAAAACCGTGAGTTAATGGGTGCAACAAACCCTAAAGAAGCTAAAGCAGGCACTATTAGAGCCGATTTTGCTGATAGTATCGATGCAAATGCTGTCCATGGCTCAGATGCAGAAGATACAGCAGCACAAGAGATAAGATATTTCTTT…
FTT0374c	FLH151668.01X	FtCD00020491	DQ681592	pyrG	CTP synthase	ATGAATTCTAACACTAAAATTATATTCGTCACAGGTGGGGTAGTATCATCACTTGGTAAGGGTGTAACTGCGGCATCTTTGGCTACTCTCTTAGAAAGTCGTGGTCTTAATGTAACAATGATGAAGCTTGATCCATACATCAATGTTGATCCAGGGACTATGAGTCCATTGCAACATGGTGAAGTTTTTGTAACCGAAGATGGCGCAGAGACTGATCTTGATTTGGGTCATTATGAGCGCTTTATCCGCAATAAGATGACTCAAGCAAATAACTTCACAACCGGTAAAGTATACCAGAGTGTGTTAAGAAGAGAGCGTAAGGGTGATTATCTAGGTGCTACTATCCAGGTGATTCCACATATCACTGATGAGATCAAAAGGCGTATTTGTAGTGGTATT…
FTT0376c	FLH157366.01X	FtCD00021105	AY774376		hypothetical membrane protein	ATGATTGAGCCATATTATTTTATAAATAGTAGAATTTATTCATTAAATGTTACTCAACAAGATGGCTATAAAGCCCATTTGAATTTCTATAGATGCTTGTTTATGTGTGATTTTGATGCTGAAATAAAAACATCACCTATTTATGTGGATATAATAAGAAATTTTGTATTCAGTATGTTTATAAATATAGATTATCCAGCATTTTCTTATTTTCTAAGTCCAGATGAGTTGGGTAAGTCAGATGATGATACTAGTTATCAAAAGTCATATAAAGTTACAGTATCTGGTGATGGTATTACAGAGTTAAACATAAGAAATGTTGAGTATGATTATCATGATTTCATTATAAAAAATGAAAGTGAGCTATCCTTAAATTTATTAGGAGCTAAAAAAGTTAAT…
FTT0378c	FLH204766.01X	FtCD00022949	DQ681593		hypothetical protein	ATGTATTTAAATAAAGTACACTACATATGGATGGGATCATTAATCCCAGATAAATATATAAATAATATTTTTTACTTACTATCCCAATCGGATCATTACATTAATATATGGACAGATAGACCAGAAGAAACTAGATTGAAATTTTTAGATAAAATAGGAGGATATAGTCATTTACAAAGAAATAAAATTACCAATAGACTAGAATTTAAACAAATTTTTGAATTAGAGAATTGGTGTCAAATCAATCTAAGTAATTATTTAACACTTATTCAGATGAAGACTCTCTTGGAAACTTTTATGTTCGAATATCCTAATTATTCAGATAGATATAATAAATACAGCCTAGAAGTACTATATAAGTTAGGCAATTTAGCAACACTAAGTGATATATTAAGATTA…
FTT0380c	FLH158058.01X	FtCD00021188	DQ681595	gdh	NAD(P)-specific glutamate dehydrogenase	ATGAATGCTCAGAAGTACATTGATAGCGTAATTGCTCAAGTAGAAAAAAGAGATGGTCATGAAAAAGAATTCATCCAAGCTGTAAAAGAAGTATTTTCTACACTTAAACCAGCTCTAGAGCATAATCCTAAATATATCGAAGAAAATATTCTAGCACGTATGGTTGAGCCTGAAAGAGGTATTTCTTTTAGAGTACCATGGGTTGATAAGGATGGTAATATCCAAGTAAACCGTGGTTACAGATATCAGTTTAATGGCGCTATCGGTCCTTTTAAAGGCGGGATTAGATTCCACCCAAGTGTATACTCTGGTATTATCAAATTCTTAGGCTTCGAGCAAGTTTTCAAAAACAGCTTAACTACTCTACCTATGGGTGGTGGTAAAGGTGGTGCTGACTTT…
FTT0381	FLH204799.01X	FtCD00022969	DQ681596	isftu2	Transposase	ATGAATTATCATATAAAAGAAGTATTCTGGTCAATTATTTTATCATTCTTAAAATCACAAAAAGGTATACATACCAATGATGAAGCCAAATTAAGATTGTTTATTGAAGCTGTATTTTATGTGTTACGTACAGGCTGTCAATGGAGAATGTTACCATTTTATTATGGTAAATATAGATCAATACATAAGCGTTTTAAAGATTGGTGTGATAAAGATATATTTTCTAGATTATTTAAATCAGTACAAAACCCTGATTTACAAGAAGTCATGCTTGATTCAACAATAGCAAGAGCACATGCTTGTGCTACGGGATATGATAAAGATGATAACCAAGCAATTGGTAGATCAGTTGGTAGGATAACCACTAAAATCCATGCTATGACTGATGCTTTAGGTAAT…
FTT0382	FLH204727.01X	FtCD00022921	DQ681597		hypothetical protein	ATGAAAAAAATAATTGCGATTGTTTTAGTATCATGTGTACTAGCTTCATGTGTATCAACATATCAGCCATTACATGCAGATCAACAATCACAACAAAAAGCATAG
FTT0383	FLH150064.01X	FtCD00020310	AY774736		hypothetical protein	ATGGCGAATCAATATTCTGGAAATTTTGAGCAAATTGTCAAAAATAGATTTAAATGCTCAGCGAGAGAGATCTTATTAAAATGCCAAAGAGAAGGCTTAAGTTACCAAGATGCTGAAAAAGTTTTGGGTTTTAAGCATGTTACTATCAGAAAGTGGGCTAAGAGATTTGATATTAAGCTCCCGCCTAGATTTAGATCTCATGATGAGCATCTTGAACAAAGAAGAGAGATAGCATATGTCAATCAATGTAAGTTGAATAAAATCAATAAAAGAAATGTTTTTAGTCGCTGCTGGATAAATATGAATCTTTATTCTGTAATCAAAGCTAAATCTTAG
FTT0384c	FLH150044.01X	FtCD00020308	AY774723	psd	phosphatidylserine decarboxylase proenzyme	ATGAGAGATAATTTGTTTATATATTTACAATATCTACTTCCTCACACTTTAACATCACGTTTAGTTAGTAAACTTGCTGACTCAGAAAATAAAATTATTAAAAACCATCTAATAAAACTTGCTATTAAGAAATTCAATATTAATTTAGTTGAAGCTAAAGAAACCGATATAAGCAAATACAAATCTTTTAATGATTTTTTCATAAGAGAACTTAAAGATGATTTAAGACCCATTTCTAATGATAAAAATGTTATCTCCTCTCCTGCAGATGGTGTATTAAGTCAATTCGGCACGATAACTGATAATAGTCTAATTCAAGCCAAAGGTAAACTCTTTTCTCTAGAATCATTAATTGCTAGTAGTTCAACAACTAGCTTCACAAAATTTGCAACTATATAT…
FTT0563	FLH151960.01X	FtCD00020530	AY774985	potH	polyamine transporter, subunit H, ABC transporter, membrane protein	ATGGGAATCAGAAAATATCATGGTGCTATACTCATAATGCAAAACTTAGAAAAAAGCTTTAGACATACTTTAGTTTATCTAATTCCTTTTATATGGTTTGTAGTTTTTCTGCTTATACCATTTTTATTTGTCGTAGGTATTAGCTTTACTTTACCCGCTGATGGTACTCCGCCTGTTACTTCGTTGATGACTTATAAACAATCAGCACTACACTTTACGCTATATCTAAGTAATTATATTGAGCTGATTCATTATAATCTAATATTCATATCATTACTTAAATCTTTTAAAGTTGCTTTTATAACTACAGTATTGTGTATTTTAATCGGTTATCCGATGGCATTAGCATTATCAAAAGCCAAAAAGAACACCCAGATTTTCTTTTTAGTTCTAATTATC…
FTT0564	FLH204637.01X	FtCD00022864	DQ681598	potI	polyamine transporter, subunit I, ABC transporter, membrane protein	ATGAAAAGATTTTCATTTAGTAAGATAATGCTTATATTAGATTTGATCTTTTTATATATTCCACTAATAATTTTAGTGGTTTTCTCATTTAGTAATTCTGAAATTATTAACTTATGGGGTGGTTTTACTTTTGACTGGTATCATGAGGTTATTCATGATGAAGATATCATAAATGCCACTTTTACTAGCCTTAAAATAGCTACTATAACCTCTGCAATAGCTACAATATTAGGTACTATAATTGCTTATGCTATGACTAGATTTAAATTCTTTAGATCTAGAAGTTTTTTATATGGTCTTGTAGCAACACCTCTTGTATTACCAGATATTATTCTAGGGGTTGCTTTACTATTGATGTTTTCAACCTTACAACATTTAATTGGCTGGTCACACGAGCGT…
FTT0565c	FLH204707.01X	FtCD00022908	DQ681599	isftu2	Transposase	ATGAATTATCATATAAAAGAAGTATTCTGGTCAATTATTTTATCATTCTTAAAATCACAAAAAGGTATACATACCAATGATGAAGCCAAATTAAGATTGTTTATTGAAGCTGTATTTTATGTGTTACGTACAGGCTGTCAATGGAGAATGTTACCATTTTATTATGGTAAATATAGATCAATACATAAGCGTTTTAAAGATTGGTGTGATAAAGATATATTTTCTAGATTATTTAAATCAGTACAAAACCCTGATTTACAAGAAGTCATGCTTGATTCAACAATAGCAAGAGCACATGCTTGTGCTACGGGATATGATAAAGATGATAACCAAGCAATTGGTAGATCAGTTGGTAGGATAACCACTAAAATCCATGCTATGACTGATGCTTTAGGTAAT…
FTT0566	FLH231456.01X	FtCD00039361	DQ681600		hypothetical protein	ATGAAAGAAAGTAACTATGTAACACCTGAAAAGATGTTAAAGGATGGGGTAGATGGTGATATATTCAACGGAGTATTTATACGCAAAGGTACTATTGCTGCTGCTATTAAAAATGCTCAGATCTTAGATGATCCTCAATCAAATAAGATAGACAAAGAAAAAGCTCTAGAATATTTAAAAGACGCAATACCAACAAGGTTAAATAAAGCATTTTTTGGTATGGATAAAGTACTTTCTTGGAAAAATGAACGTCTTAATAAACTTTAG
FTT0568	FLH149936.01X	FtCD00020299	AY774714		hypothetical protein	ATGAAAAATATAATTTTTGATTTTGATTCGACATTAATTAAAAAAGAGTCTTTAGAACTAATCTTAGAACCAATATTGCAAAAATCTCCAGCAAAATTAAAAGAGATAGAGTATATAACTAACTTAGGTATGCAAGGAGATATTAGTTTTAGAGACTCTCTACAAAAAAGATTAGCAATTGCTAGCCCAACTAAGCAGAGCATAAAAGAGTTTAGTAATAAATATTGTCCTAATTTACTAACAGATGGTATCAAAGAATTAGTTCAAGATCTCAAAAACAAAGGTTTTGAAATATGGATCTTTAGTGGTGGTTTAAGTGAAAGTATTCAGCCATTTGCAGATTATTTGAATATCCCTCGAGAAAATATTTTTGCTGTTGAGACTATTTGGAATAGTGAT…
FTT0569c	FLH150085.01X	FtCD00020313	DQ681601		conserved hypothetical membrane protein	ATGAAAATTTTAAAATACTTTTATGGATCGTTCTTCGTCACCCTAATTGGTATAGTTATTGCGGTTTTTATTTATCCAAATGCTCCACTAGAAACAATATACTCGGTTTTAATATTAGCAATACTTGAAATATCACTTAGTTTTGATAATGCTGTAATCAACGCAAAAATTCTTGGGCAAATGTCTCCAAGGTGGCAAAAGATTTTTATATACATAGGTCTACCTATAGCGGTATTTGGAATGCGGTTACTATTCCCAATTTTATTAGTAAGTGTGACAAGTGGTATCAATTTTATGAATGTAGTCACTCTTGCTTTAGATAACCCGCAACAATACCAAGCAATATTAGAGCACTCTATGCCGTATATTTGTAGCTTTGGCGGTAGTTTCTTACTTATG…
FTT0570	FLH150136.01X	FtCD00020318	AY774719		hypothetical lipoprotein	GTGTCAATAGCTTTATATACACTGATTTCCTTAGCAGGGTGTTTTTTTGCGTGGCGCAACTTTATGAAAAATAAAGAGTATGCTATAAGTATAGCAGAGCGTGCAGCAGTTAAATACAATTTAGATTTACTTGATGATACTGTTTGTTTACGTAAGCTAAATTTGTGGTTTGAGAATAAAAGGCTAGTTTTTTATCGAGTATATTCATTTGACTATAATACCCAAAGTTCAGATGACAGATATAGAGGTTATATAGTTATCAGAAATGGCAAGCTAAATGATGTTGTTGTTTCAGAGTTTGAAAAAGCTGATATTATCAATGAAAGTATCATATCTGAACAAGCTACTAATACTTCTTCATGTAAGTCAGCACATAATATTATAACTTTTGATGAGTAG
FTT0571	FLH149980.01X	FtCD00020303	AY774741		hypothetical protein	ATGTTTCATTTGCACCAATTGCCGAAGTTAAAAGGCAGAAATTATAGCTGTAGTCCTTTTTGCTTAAAACTTGAACTATATTTAAAAGTTACAAATTTAAATTATCAAAATCACTTTAATCTTGAGTTTAACAAGTCACCAACAGGTAAAATGCCCTATATAGAAACCATGGGTAAGAAATTTGCTGATAGTAATCTCATTATCGAAATGTTAGATAAGCAAAATCATAATAATCTGGATGAGCACCTAAATTCTGAGCAAAAAGCTATATCTACAGCATTTATAAGGTTATGTGAGGATAGCTTGTATTGGGTTGGGGTATATAGTCGTTGGGCTGATAAAGATAATTATACATGGAAGCAGGAGTTTCTAGAATCCACTAAATTACCAAAGGCTATG…
FTT0572	FLH204617.01X	FtCD00022854	DQ681602		Proton-dependent oligopeptide transport (POT) family protein	ATGCAGCATATAGAAGAAAAACAAAGAACAAAATATTTTATTTCATTATTTTGGTTACAATTATTTGAAAGGTTTAGTTTTTTTGGTTTCTTTTATATCTTAATATTCTTCTGTATAAATAAGCTAAATCTTACAGAGTCGTATGCTTCAACTTTTGCAGGTTCTTTTACTGCGCTTTGTTATGTTTTAAGCTCATTAGGGGGCTTTATTTCTGATAAGGCTTTAGGTGTTAGAAGAACCTTAATAGCTGGAGGTATCTGTTTAATATTAGGATATTCATTATTATCAACTAGTGATATGCTAATGAATTTTTCTATTTATGTTGGGTTGGCAATGATTATCGTTGGAGCATGTTTATTTGTGCCTATGACTTTAAACAGTATGTCTAGATTATATGCA…
FTT0573	FLH150116.01X	FtCD00020316	AY774710	alr	alanine racemase	ATGAATATTCTAAAGATTAGTAAACAAACTTTAAGGAATAATATTAAAATTATTCGAGAGTATATTGGCAACGCTAAGATGTGTTTTCCTGTCAAGGCAAATGCTTATGGGCATGGTATAGAAGACATAGTAGAAAATACACATGATTTAGTCGATTTCTTTGCTGTTGCTAACTCTCTAGAGGCTTTTAGAGTAACAGCTGTTGCTAAAAATCCAGTGCTAGTATTTGGAGTAATATACTATGAATATATTGAAAAAATGATTTCAGAAAATATCAGAGTTAGCATTCAAGACTATGAAGATATTGAAAAGTTAGAGCAAATAGCCAAAGAGCTTGATAAAAAAGTATATGCCCATATTAATATAAACACAGGTATGAATCGCATGGGCGTAGATTAT…
FTT0575	FLH150020.01X	FtCD00020306	AY774709	pheA	prephenate dehydratase	ATGATTAAAGTATCTTTTCGGGGCGAGCATGGAGCTTACTCTGAGCAAGCAATAACTAATTTTTTAGAGCAGCAGAATATAAAAGATTTTCAAACAGTTACATGCTGGTCTTTTTCTGATGCTATTGAACATACTATAAGTGGCAAATCAAATTTTGTAATGATTCCTGTAGAAAATTCTTTAGCTGGTTCTGTTGTACCAGCATATGATGAGTTGATTAAGAGTAATCTAAAGGTTAAAGCTGAGGTTGTTTTAAAAATAAAACATTGCTTGATGGGACTCAATGACGTCGAAATTTCGGAAATTGAAAGTGTGATATCTCATCCTCAAGCATTATCACAATGTGCTAATAGTCTTAAAAAATTAAAGCTTACTCCTGAGGCATTTGTTGATACAGCG…
FTT0826c	FLH204455.01X	FtCD00022761	DQ681603		hypothetical lipoprotein	ATGACTTTAAATAATAAATTAACGACAATGCTTTTAACTCTTTCTACAGTTTTAATTTCTTCTTGTGGCACAACAAGCCAAGAGGATATAAGCATTCTCGAACAGGCAAATAATGCTTACTCTCAAGAAAAAAAAGTTACATCCCAGGGCACAGAGTTTATCAGCAATGATACATACACCTTCAATAAACAAGAAAATGTGACAAGCTCAACGTCTGGTGGTGGAATAAGCTTTGGAATCTCCTAG
FTT0827c	FLH155210.01X	FtCD00020844	AY774443		Hypothetical protein yieG	ATGTTAGATAAGATAGAGTCATTTTTTAATCTAAAAACATATAATACTTCGATAAGAAAAGAATTTTTAGCTGGACTAGCCTCCTTTTTAGCAATCTCTTATATAATTGTCGTTAACCCAAAAATCTTAGCAACAACAGGCATGCCTAGCAATGCCCTAGTTACTAGCACAATTCTAATATCTGCTTTTGGTAGCATAACGATGGGATTATTTACTCGCAATCCTTTTGTAATTGCTCCTGGAATGGGGATGAATATTTTTTTTGCCTACACCGCAGTCTCCGTATATCATCTACCATGGCAAACTGTTTTAGGCGCAACTTTCTGGTCAGGAATAATATTTAGCTTACTAGTAATCTTAAATATTCGTACTAAGATTATGCTTAGCCTCCCTAAATCA…
FTT0829c	FLH155263.01X	FtCD00020854	DQ681604		Aspartate:alanine antiporter	ATGTTTCATGAAGTAATTCTTAATGTTTTAAAAAATCCTTTTATAGCACTATTTTTAACATTAAGTTTAGGCTACTTAGTTGGCAAAATAAAATATAAGACTTTTGTGTTAGGAGGAATATCAGGATCTCTTATAATTGGTGTAATTATAGGGCAACTTAACATTACCATCTCACCAGATATTGGCTCTTTATTTTTTGCATTATTCATATATGCAGGTGGTTATCAAGGAGGAGCTCAATTTTTTAGATCATTAAACAAAGATACACTTTTACTACTGGCTTCTTCAACTATAACCTGCGTACTAGGCTTACTATGCGTACTAGTTTTTGCTTGGATATTCCAGTTAGACAAAGGCACTGCAGCAGGATTAGGTGCAGGAGGATTAACACAATCTGCA…
FTT0831c	FLH151612.01X	FtCD00020485	AY774915		OmpA family protein	ATGAAAAAATTACTGAAACTATGCTTAATGACATCATTAATTACAACACTCTCAGCCTGCCAAACACTAGATGATAAAGATAAAGATAGTGGTCCACTAACATTTCCAACATTAGAACCTTGTACTGCCGAGCTACTTCAATCAAATCAATCTTTTATATGTGTAAAAGAACAAACAGGACCTGATCTAATCGAAACAAATATAAAATTTGATGCTGATAGCTATACATTAAACACTCAGGCTAAAGAAGTTTTAGATAAGCTTTTTGCTTATTTGAAACTAACTGATACTACAAATTTCACAATTAAAGGTTATGCTGGAAAAGTTGAATCAAAAATTCTCACAGATCAGAAAATCCTAACCGACTATAATATTAGACTATCAAAAAACCGTGCTAGT…
FTT0832	FLH155185.01X	FtCD00020842	AY774423	fkpB	FKBP-type 16 kDa peptidyl-prolyl cis-transisomerase	ATGAAATTCGCATCAGATAGTTTTGTAAAAATGCACTTTAAATTTAGACTTAAAGATGGCTCAATTGCTGAAGATACAGAAAATTATAATAGACCTTTTGTATTTCAGATGGGTCAGGGTTGTTTTACTGAAAAAGTCGAGAATGAGCTTGTTGGGACAACGATTGGTGAAACTAAAAGGGTAGTTTTAATGCCAGAAGAGGCTTTTGGCGAGAAACATCCTGCAAGTATCTATTCAGTGCCTAAATATAGATTTCCTAAAGATATGCACTTAGAAGAAGGACTTATAGTTTCTTTTAGTCAAAAAGATGGCTCTAAGTTGCCAGGATTGATTACAGAAATTAATGAGCAAGATGTTACCGTAGATTTTAATCATCCATTATCAGGACAGATAATCGTA…
FTT0833	FLH204460.01X	FtCD00039243	DQ681605	ispH	IspH protein	ATGAAGATATTACTAGCTAATCCCAGGGGCTTTTGTGCTGGTGTAAGTCGTGCTGTTGAGACTGTAGAGAAAGTTTTAGAAGTTGAGAAGTCGCCTGTATATGTGCGTCATGAGGTCGTACATAATAAGGTTGTTGTAGATTCTCTTAAGAAAAAGGGTGTGGTTTTTGTCAAAGAAGTTGATGAAGTACCAGATGACGCGGTATGTATCTTTAGTGCTCATGGAGTTTCTCTAAAGGTTGAAGAAGCTGCTGCCAAGAAAAATCTAGTACTTTATGATGCAACATGTCCTTTAGTTACTAAGGTACACAGAGGTGTACGTTTGGCAAGTAATAACGATGCTGAATGTATCTTGATTGGTCATAAAGGCCATCCAGAAGTTCAAGGTACTATGGGGCAG…
FTT0834	FLH155086.01X	FtCD00020829	AY774417	aroQ	chorismate mutase	ATGCAAAGATCAATTAGAGGCGCTACTACTGTAGATAAAGATAGTAAAGAAAATGTCATAAGTGCAACAAAAGAGCTTTTGCAACAAATTATCAAGCATAATAATGTCAGTCCTAGTGATATTGTAAACATTGTATTTACCGCAACTACTGATATCAAATCAGAGTTTCCAGCGGTTGCAGCGCGTGAGCTTGGTCTGGTTGATGTCCCTTTAATAGATTGTCAGCAAATGATGCGTGATGGAGCTTTAGAGTTTTGTATTAGAGTTATGTTGACATATAATACTGACAAAACTCAAACGGATATTAAACATATTTACTTGCGTGGAGCAAAAGTGTTAAGACCTGATTTATTAAGAAAATAG
FTT0836c	FLH151432.01X	FtCD00020449	AY774919		hypothetical protein	ATGAAAAAAACGACTTTATTGACTTTAGCTGTAATTTGTACTGCCTTGATATCATGTGCAAGCTCTCAAGGTGATTCATTTGGATATGTTGCTCCACCGCCGACTCAACAAGATTTAGAATCAAATGAGCCAGGTCCTATGCAACAGCCTGGCGGAGTATCAGCTGGGATTATTGCCGAGCAAGGTCATCCGAGCCATGATGCTTTTATTACTATCAAAGAATAG
FTT0853	FLH204504.01X	FtCD00022790	DQ681606		arsenite permease family protein	ATGATAATTCCTATAATAGTTTTAATAGGTGTTTTTATACTTATTGCAATTAGACAAATTGGTAATATAAAACTTCAAATCTGGCAAATAATGCTTTTAGGCGCAATTATCGTTTTAATCACACGACAAATTTCTGTTGCCAATGCTTTAAAGTCGATAAATTTAGATGTGATGATGTTTTTATTTAGTATGTTTGTTATTGGTGTGGCGCTTGAAGAGAGTGGCTATCTTAGCTTTTTATCTTACAGAATATTTAAAAGAGCAAAAAATATAAATCAATTATTATTGTATATTTTGTTTGGAGCGGGATTAGCTTCTGCAGTTGTCATGAATGATACTTTGGCTATTATTGGTACGCCTATGCTTTTATTAGTTGCGAGGAAATATGCTATTAATCCT…
FTT1181c	FLH151708.01X	FtCD00020501	DQ681607	ggt	Gamma-glutamyltranspeptidase	ATGCGTCGTTTTTTGTTATCTTATACTTATTCTGTTTTTAAAAATACACTGAGGTTATTAGTGAAAAAATTATTTGTAAACTTAATGTCATTGTTAATACTGCTACCAAGTTTAACTCTAATTGCTGCACCAGTCCCGACAGGTTATGGTTTTATTCCTATCCAAGAAGAGATGCAAATTGCTCAACCTGTTACTGCAACACATGGTATGGTTTCTTCTCAAGAAGCTCTGGCAAGTAAAGTAGGCTTAGATATCCTAAAGCAAGGTGGTAATGCTGTAGATGCAGCTGTAGCTGTTGGTTTTGCTTTAGCTGTCACGCTACCAAGAGCTGGTAATCTCGCTGGTGGTGGATTTATGATTATACATTTACAAGATGGCAATAAGAATATAGCTATAAAC…
FTT1183c	FLH151604.01X	FtCD00020483	AY774910		conserved hypothetical lipoprotein	ATGATTAAAAGAATAGCTATTATCGGTGCTGGTCTTGCGGGATGTTCGTTGGCGTATGAGTTAAGTAAATCAGCTAGCTTTGATATAACTATATTTGATAAGAATTCTGAGGTGGCTGGTGAAGCATCAGGTAATTTTGCTGGGATATTAGCGCCATATTTAACTTTTGATAATAACTTTTCTGATCAATTTCATACTCTTGGTTATAGATTATTGATAGATTTTATCAACCAGTATAAAAATAACGTAGAAATTTGTAACCAAGGAGTAATCCAACTTCTAAGTGATCCAAAAGAGCAATGTAGATATCAAAAAATTTTCACAAATAGAGATATAGATCCAAATATAGCTAAATTATTATCAGCTACACAAGTTTCTCAACTTATAAATACAACCACC…
FTT1184c	FLH157943.01X	FtCD00021171	AY774487		hypothetical protein	ATGAAAATAGAAGTTATCTACGCTTTAGCTAATGAGCAACTATCTTTTTTTGTTGAAGTTGATGAAGTAATCAATGTTAGGCAAGCTCTCAAATTATCGAAAATAACACATAAATACCCAGAGTTAGGAGCTATTGAGAGTTTAAAAGTAGGTGTATATAGCCAGTTAGTAGATTTAGATTATCAACTAAAAGATAGGGATAGGGTAGAAATATACAGAAATCTAACTATAGATCCTAAACAGGCACGTATGTTAAGAGCTGAGCAAAAGCGTAAAAAAGAAGGTATAAGACTTCCTGGAGCATAG
FTT1185c	FLH158061.01X	FtCD00021189	AY774498		hypothetical protein	ATGAATAAGGTTAATAAATCTGCAGTTGTAAATTATAGTGCCGCACAGATGTACGAGCTTGTAAATGATATTAGAAGCTACCCTAAATTTCTACCGATGTGTTATGACATTGAAATTTTTGAGCAAACTGAAACAGAGACAAAAGCATCATTGAAAATAAAATCTGGATTTGTGAAGCTTGATTTTGGTACGCATAATACAATGGTCAAAAATGAGCATATTCATCTCAACTTAATGAATGGTCCATTTAAAAGCTTAACTGGTGATTGGAAGTTTGAGCCAATAGATGAAGACTCATGTAAGGTTTCATTAGATATGGAATTTACCTTCGAAAATAAATTTGTCGAGATGGCTCTTGGACCAGTTTTCCGTGGCTTAGCAGATAAGATGTTAGGCGCT…
FTT1186	FLH158084.01X	FtCD00021193	DQ681609	smpB	SsrA (tmRNA)-binding protein	ATGAGTAAACATAAGGTTTCTCCAGCGACTATTGCTAAAAATAAAAAAGCCTTGCATGATTATACTATTTTAGAGAAATTTGAAGCCGGAATAGTTCTACAAGGTTGGGAAGTAAAAAGTATTCGCGCTGGTAAAGTACAAATGGTTGATAGTCATGTGCATATTAAACATGGTGAAGCGTGGCTTTTTAATTGTCTAATCACACCTTTGCTATCTGCCTCAACTCATGTGGTTGCAGATGCTGCAGCAACACGCAAGCTACTTCTCAATCGTCGTGAGATTAATAAGATTATGGGTAGAATTGAGCAAAAAGGTTTTACATGTATACCTCTTTCTATGTATTGGAAAGGTCCACGAGTAAAAGTAGAAATAGCATTAGCTCAAGGTAAAAAAGTTCAT…
FTT1187	FLH204427.01X	FtCD00022747	DQ681610		hypothetical protein	ATGACAAAGACCGAGAAAAAACTACGCCACTATATCACCAAGGCTATTGCAGACTATAAGCTTCTTGATAAAGGTGATAAAGTTATGCTATGCCTATCTGGTGGTAAAGATTCTTTTGGACTTCTAAAAGTCTTACATGGTTTAATTGAAGATAAAACCTATGATATTGACCTTCATGTATATACACTAGATCAGTCTCAACCAGGTTGGGATGATAGTCAACTTAGAAAATATCTTGATGATCTCGGTGTATCTTATGAAATTGAGACAAAAAACACTTATGGTGTAATCATAGACAAAGTTCCAGAGGGTAAAACCTATTGCTCACTATGTTCTAGGCTACGTCGTGGTAACATCTATAGATATGCAAAAGAGCATAAAATGGATAAAATAATTCTG…
FTT1188	FLH154194.01X	FtCD00020733	DQ681611		hypothetical membrane protein	ATGTTAAGGTCAATACAGTATAAAGCTTTACCAATATTATACCTATGGGTGGTTGGCATAATCTCTGTTAATATTCACATACAAATGTTATCACATGGAGTTCCATATCCAGGAGACTATTTTATACCTCCAAAATTTTATCAATTCTCATTACAATTAGTACAATTATGTGGAATGTATTATTTATATAAGCAAATTACTGAGCGATATTCATATTTCACAAAAATTAAACACATATTAATTTTTCTTATGATTATGTCAGCGTTAGAAGAGCTGATTTTACGACTTCCTATGACAGAAGGCTACATAGTTGATAAACATTTTTTGTTTATTTGGTTGAACAACTACTTACCTCAACTCATCTTATTATTTATCTCATGTTATACTGTAGCATTAGTA…
FTT1190c	FLH204412.01X	FtCD00022737	DQ681612	xseA	Exodeoxyribonuclease VII large subunit	ATGCAACAATCACTAAAATTAAGCGAATTTCTTGAGCTTATGAAAAGTACTATAGAAATGAGTTTTGGCTATGAAGGTTTCTGGATAGTTGCTGAATTATCTGAATGGCGTAAGTCTGGAAAACACTATTATGGCGAACTTATTGAGCATGATGGTATAAGTAAATACCCTATTGCTAAAATTAGGTGTAATTGTTGGGCAAATAAAGCTGATTATATTCATAATAAGTTTAGCTTAGTAACTGGAGAAAAACTTAGTTCTGATATGAAAGTTCTAATGAAAGTTACAGTGAGTTATCATATCAGTTTTGGATTGAGTCTAAATATTGTTGATATTGATCCAGCTTTTACACTTGGTGATAGACAAGCTCGTAAAATAGGAATTCTTGAGAAATTAGCT…
FTT1191	FLH154064.01X	FtCD00020714	AY774604		Aminoacylase	ATGATTAGTATATGTGCAAACACAATAAAAGAACTACAAAGGATTCGCCAACACATACACCAATACCCAGAACTTGGTTTTGATGTATATAATACTGCTGACTTTATCGCTAATGAGTTAGAAAAAATAGGGCTAGAAATTAAAAGAGGAATCGGTAAGACAGGTTTAATAGCTGATTTAAAAGTTACAGCTGCCAAAAAAACTATTGCTCTACGAGCAGATATGGATGCGCTACCAATTCACGAGCAAAATAATTGTGAATATAAATCTAAAATCGCTGGCAAAGCACATATGTGTGGTCATGATGCTCACTGTGCTATGGTTATAGTAGCAGCACAGCAATTTGCTGCAAATAAAGACAAACTAAATGTAAATATTAGATTTATATTTCAACCATCT…
FTT1193c	FLH157410.01X	FtCD00021113	AY774138		hypothetical protein	ATGTTCAGTAACATCTTAGCGATATCTTCAGATTGTCCAATCTCTCCTAAAGTTGATTTAATTAATGATAATGTTTCTTCAGATACTATTAGAGACTTTATGTGGGGAATTGGTTGGTATCATTCAGATCATAATGAAGCAACTATCTTAAAAGAAAGTCATGTTGAGAGTGTCGATGTTTTAAGATCTCTGTTCAAAGATAATTCAAATTTTATCTCAAATAGTTTCATAGGTCATATTTATAGTCATAGTTTATTTGATAAAACAAATCTAAACTTACAACCATTTGTAAAACCTTATGCTGGTAAAGAGTGGACTTTGGTCCATAATGGTGATTTAAATTATGGTTATGAAAATATCTTAAAACTTACTGTCACTGATTATGAACCAGTTGGTAAA…
FTT1246	FLH204266.01X	FtCD00022652	DQ681613		hypothetical protein	ATGAAATGCTTGATGAGGATTTTGAGGAAGATTACTATGACTATTACGAGTATGACTAATAATAGATCATTATTAAAATATTTTTTTGTCTTACTAATATTATTTATATCAGCGGCTATTTTATCTACAAATGAAGGTACGAGGCATACTAAATCAAATTATTTTTTAGAATCTAGAACTCCTAAAATAACAAAAAAACCTGATTTTTCTGAGATCAAAAATTTCAAAGAAAGAAAAGACGATTTTATAAAATATATGTTAGCAGCAATTAAGATCGCTAATAAAGAAATATGCTTACAACAGCAGCAAATTCAAAAACTTAAAAATGCCTTAGACAAAAAAGGTTCATTAAATTCTCAACAAGATAAAAAACTTAGTGCTTATCTTGAATACTATAAA…
FTT1247	FLH156551.01X	FtCD00020993	DQ681614		ABC transporter, membrane protein	ATGGAAATGAATATTGATCAAAATACTGTTTATTTTGCAGGATTGCTAACTCTCAAACAAATTAATCCCAAGTTAGTTGAGAAAAAAGTTTCTCGATCTAAAGTTAAGTTAAATCGTATTGATATTACAAAGATTCAAGCCCTAGATACTGCCGGAGCCTACTTTATTCTTAAAGTTCTTAAGGATCTAGAGCTAACCAAAGAAGATTTAGTTTTTGATAATCACAAGGATAAAAACCTTATTGAACTTGTCGCAAACAACTTCCCAACTAGAGTTGATAAAGAAAATTCACATAAATCCAATATAGTTTTTACTAGCATATATACCCTTGGTAAAAACACAAATAATCTTCTTCAAGAAATAAAAGCAAGCATTGGCTTTCTAGGTGCTATTCTGTTA…
FTT1248	FLH156705.01X	FtCD00021016	AY774253		ABC transporter, ATP-binding protein	ATGAGTGAAAGTTTAATTCAAGTAAGAGACCTAAGCACAAAATTTGGTAAAGAGTGGATTCATAAAGACCTAAATCTTGATATCCCTTTTGAGAAAATAAGCTGTATCATCGGTGCTAGTGGTTGTGGCAAAACTACATTAATGCGTGAAATTCTTATGCTTCAACCAATTTACTCTGGTAAAATTTTCTTGCTTGGTCAAGAAATATCAAAACTTGCTGATAACCCAATCAAGCGTAAAGCAATATCCAGTAAAATGAGTATGATGTTTCAACATTGTGCACTTTTTTCTTCTTTAACTAATTTGCAAAATGTAATTTTTCCTCTTAGACAACATACAAAACTACCTATAGACATACTTACTGACATAGCAATTATAAAATTAAAAATGGTTGGTCTT…
FTT1249	FLH156645.01X	FtCD00021008	AY774269		mycobacterial cell entry (mce) related family protein	ATGAACGAAGATAGTATCAAAAATCTAATCGCGGGATTATTCGTGATTTTTATGGTATTTGTAATGATATTTATAGGTTTCTTTTTATCAGGTGGATTTAAAGATCAACACACTACTACATTCGTGACAAACTTTAAAAGTATCTCTGGGCTTAATGTTGGCTCGGATGTTTCTTACAAAGGTTTTAGTATTGGTAAAGTATCTGATATATCGATAAATAAAAATAATCCTAAACTTGTTAGCGTTTATATGAAAATAAATAGTCAAATACCAATATATAAACAAACTGTAGCAACATTACAAAGTATGGGAATTACTGGTCAATCAAAAGTCGAACTTTCTTTAGATATTGATGCAAAAAATACTAGTCTAGATCTAATACATATCAAAAAAGGACAA…
FTT1250	FLH204319.01X	FtCD00022683	DQ681615		hypothetical protein	ATGAAAAAATATTTATTATTAACTATATTATTCTTACCTTTGCAATTATTTGCTTTTTCATTTTTTGGCGATCCTGTAAAGGTACCAGAACAAAAAGAATACGTTATCTACAGTAAACAAATAGAATCTAAACCATTACCAGATACTGAGAACGCTGATATTAGTACGACTTTACTAGTATATAATATCCAAACTCAAGCATCGACATCAACACAAATGTTTTATCTAAAAGGTAATCGTCTTTATACATTTAAAAATAGTTCTTGGGCAATGCCAGTATCAAAAATGCTTACTGTAGCAACCTTTGAATATATTCTAGATCATAATATAGTTAATAATCTTGCTTTCCAGGATATTAACATTCGACAAGATTTTACCCTATCAGGGACAACTACTTAT…
FTT1251c	FLH204317.01X	FtCD00022682	DQ681616		conserved hypothetical membrane protein	ATGGGTATTTTTAATAAAAGTTTTGTAACTAATTTGGTAGCTGCAATACTAGCAATAATTGGTTGGTATTTTGCTGAAGTACACATCAAAAATATTGGTTTTTATGCTTTATCAGGAGCATTAACTAATTGGATAGCAATATACATGCTCTTTGAGAAAATTCCATTTCTCTACGGCTCTGGAATTATTCCTAATAAATTTGAGAGTTTTAAGCGAGCTATAAAGAAGCTGATCATGGAGCAATTTTTTTCACCGCAGAATATAAATAATTTTCTTAAAAGCGATGATATCAAAAGGTACCTGGCGGATAATATAGCAGCTAAAATTGATTATAATAAAATTTTTGATAGCTTTATTGATATGCTTATGAGTAGTAAGTATGGTTCAATGATTGATATG…
FTT1252	FLH204325.01X	FtCD00022685	DQ681617		hypothetical protein	ATGAGAACTATTCGAGGTTTTTTCTCTGACATTTCAACAAAGACTACAATTTTTAATATTTCAGGAGAATATTATAACTATTTCAAAAATGTGTTACGCTTAAAAAAATCTGATTTGATTGAACTATTCAATAATACTGATAGCTTACAATATAAGACTAAAATTATCACGATTGATAATAAAAATATAACTCTTGAAGTAATCGATAAAAAACACATCAGTAATGAAAATAACTATATTACAAACCTCTATCAGGCTATTATTAAAAGTGAAAATTTTGAGCTTGTGATTCAAAAAGCTACCGAACTAGGGGTAAATAACATATATCCTATAATTACTGAATTTACAAATCACAAGTTTGATAAAAATGGCTTTGACAAAAAGCTAGAGCGCTGGCAT…
FTT1253	FLH204328.01X	FtCD00022686	DQ681618		Proton-dependent oligopeptide transport (POT) family protein	ATGCCTATGCAAAAAAATTATAATACTCTATCCGCACCTTTCTGGATTGTCTGGGGTATAGAGTTCTGGGAAAGGTTTGGATTTTATGGCTTTCAAGCAATTATCGCGCTGTATTTTACACAGAAACTTGGGCTAAGTGAAAGAGAAACTATTTATCTGATGGGGTCTTTTTTTGCTTTTACATATGGATTTATATGGGTTGGTGGACTCATAGGTGACAAAGTTCTTGGCGCTAAACGTACAATTTTATTTGGTGCGGTAATACTATGTTTATCTTACTTAAGCTTTATCTTTGCAGATAAACAAAACGTTTATTATATTTTTTCAGGAATTATTATTGGTAATGTCATATTTAAAGCAAACCCTTCTTCTTTAATTTCAAAGATGTTTGATAAAGGC…
FTT1254	FLH156355.01X	FtCD00020965	DQ681619	fadD1	Acyl-CoA synthetase (long-chain-fatty-acid--CoA ligase)	ATGAGTACATTTTCCAATAAAACATGGATAGCTAATTATCCTGATTATACTCCTGAGAATATTACGGAAAACCACGCTACAATTTTAGATCTATATGAAAAAACAATTATACAATTTCCTTACAGAGAGGCTGTATCATGTCACGATGTAAATCTAACTTTTATTGAACTTGACAAGCTTGCTACTAAAATGGCTAGTTTTCTACAAAACAACCTTGGAATCAACAAGGGAGATAGAGTCGCAATTGTACTACCTAACTGCTTACAATTTACTGTTAGCTTATTTGCATGTGTTAAGATTGGTGCTGTATTTGTCAACACCAACCCTCTTTATACTGCAGATGAGATTGAAGCAATATTTAATAATTGTAATGTCAAAGCTGCGATTGTAATGGATATG…
FTT1255c	FLH204264.01X	FtCD00022650	DQ681620		transcriptional regulator araC family protein	ATGATGAAAAAAGGACAAAGTATGATACGGGAAGAGATCACATATCTCAGTGATTGGCTTGATGGACCAGAAATAATTGCTATAAAAGGTGGAAATGCTCCAACTAGTGAAAATAAGATAAATAACCAAGAATCAGATTGGCACCATCATCGTCGTGGTAAAATATTTTGTATTGAATCAGGTCTTGTTCATGTTAGTACCCCTAATGGTTCATGGGTGTTGCCATCAAATAGGGCTGGATGGATACCACCAAATACATCACATAAAATTCGTATAAGTGGTATTGTAGAAGGCTGGGTTATTTTTATTCATCCAAATATGTGCGATGATTTGCCTAAGAGCTCAAGAGTTATTCCAATGAGTGAAGTATTAAGAGCACTTGCTTTAAGGGCAACAGAA…
FTT1256	FLH156339.01X	FtCD00020963	DQ681621	emrB	major facilitator superfamily (MFS) transport protein	ATGCAAGCTAGTAACACAATAACCGTTGGCTTTTGGAGCCAAAAAAGAACAATCGTAGCATTAGCAATAAGCTTACTGGCACTTGCTGAGATTGTTGACTTGACAATTGTCGCAGTTGCAATACCGCAGATTATGGGAGCAATCGGCGCTAATGTTGAAACTATAGCAGATGTAACTACAGTGTATATTGTCACTGCAGCAATTTTCATACTACTATCAGGTTTAATTATTGAGAAATATGGTATAAAAAGAGTAGCTCTAGTCTCATCAGTAATTTTTGGTATTTCATCAATAATGTGTGGACTTTCAACATCATTAGCTGAAATGATTGTTTTTAGAGCTTTCCAAGGTATGGGAGGTGCTTTTTTACCATCGGTAGCACAGACGTATATATCTACC…
FTT1257	FLH204272.01X	FtCD00022657	DQ681622	emrA1	HlyD family secretion protein	ATGTCAGAAGAAAAATTACAACAATCAACAATCACAAGAAATAAAAAAAGCTCGAGATTTTCGCCTAAGAAAATTATCATTGGCTCTAGCATTATTACAATTACAGCTTTAGGAATCTATGGTTATTATAAATATAACAAGATCTTCCCTAGTACTGATAATGCTTATGTTAATGCTGATATAATTAGTATTTCACCTAAAGTTGGTGGATATATAGAAAAAGTCTATATCCACAACAACCAATTTGTTCACAAAGACGATAAACTTGTTCAGATTGATCCTAAAGATTATCAACTAAAAGTAGCTCAAGCAAACTCAAAAATTATCCAAACTAAAGGGCAATTAGCTATAGCTCAAGAACAAGTAAATGTAGCTAAGTCAAACCTAACTAAAGCACAG…
FTT1258	FLH151637.01X	FtCD00020488	DQ681623		outer membrane efflux protein	ATGATACGAAATAAAATACTTCCTTTAGCGTTAATATCAGCAACCTTAATAACATCTAGCTGTAGCTTCTTTAGCCCTGAGTATGAAAGACCTAAAATCAAAGCTCCAGCTTTATGGAATAACCAAGATAAAAATATTGAAGTTACAAAAAACTGGGACCTTACGAAAGTTGCATGGTGGAGAGAGTTTAATGACCCAGTATTAAATAATCTAATAACTACTGCCTTAAAAGATAATAACAAATTACAAGTTTCTATTGGTAATATCCTACAAGCTAATGCTGAGATAAATAAAGCCAACTATGGCTGGTTACCTACCGCGAGTGTTGGTGGTGGTGGTTTTGTGGCACAGGCATTTGATGTTAACTCCAACTCAAATATCCCTCAGCTTAATAATATT…
FTT1494c	FLH155074.01X	FtCD00020826	DQ681624		glucokinase regulatory protein	ATGAATATCTTGGAAAATATTAATACAGAAAAAAGAAATCCTAGAAGTTTAAATCTTGATTCCATGTCTATAGCTGAAGCAGTTAGCTTAATGATAGATGAGGAGTATGGTGTAATTGAAGCACTAAAAGAACAGCATAGAAATATAACAGAGGTAATTTTGGCAACATCTTATTCCCTAAGAAATGGTGGCAGGATTATATATATTGGTGCAGGTACAAGTGGTAGATTAGGTATATTAGATGCCGTTGAATGTCCACCAACATTTAGTGTTGATTATAATACAATTGTAGGCTTGATAGCTGGTGGTGAAAAGGCATTTATTCAAGCTCAAGAAGGAGCTGAAGATGATGCTAATTTTGGTAAAGAAGATTTGCAGAGCATAAATCTTACAGCTAAA…
FTT1495c	FLH155287.01X	FtCD00020860	DQ681625		hypothetical membrane protein	ATGTATAGAAGTCTAAACACAAAAGTTTCTGGTTCGGCATTGTTGATGGCTTTGATATTTTCTTTTGTAATTATGGTGATGCTTACCGGGCTTTTATATACATTTAAGATGGGGCTTTTGACCACTAAAAGTATTATCAAAAATAATAATGAAAAAGTCTTAGGTGAAACCTATATATCTAAAGTTAGGGATGATATAAACTTTACAAAATCTACTGAGCTTGAGATAGGTGATAGTAAGTTTCAAATTATAGTTAATAAGGATGATGTATCATCATTTTTCCCAAATAATACAAATGCAGAGCTTTTCCAGTCACAACAATACAATAGTTATGATGTGATATATAAAGCTTTTAACTTAGGTACGCATGTTGATCTTACTGAAAGAATTATCTACAAC…
FTT1496c	FLH205200.01X	FtCD00023064	DQ681626		hypothetical membrane protein	ATGATAACCAAGCGCAATAATAAAGCTGCTGGATTTACGTTGCCAGAGCTAATGGTTTCAATGGTTATAGCAGCAATCGTTATGGCAATGGCTATTGGTATTTATATTGATATGAAGAAGCAATATATCAAACTAAGTGACAAACATAAGATAAATACTAATCAGCTTTTGATTAAGCAAATTTTCTATAATGCTATAGGTCATTCTGGATTTACGACTAAATATGGTGATATTTATCAACAGCTTGTGGATAACTCTGGGGATAACTTTGGAGATATCTTTGGGAAAATGGGGGTAATAACCATAGGTAAAGCTCCAATTCAAAATTTAGAAGGTCTGCCAAAGGGATTAAGTCTTTCAGTTGAAGCTTGTAAAGAGCGAATGTTACAAGATGAAGAT…
FTT1497c	FLH205207.01X	FtCD00023070	DQ681627		hypothetical membrane protein	ATGCTCTTGCAACACATAAAATCTCAAGCAGGCTTTGGCATAGTAGAATCAATGCTTGCAGCTTTGATTTTATTGTTTGTATTATCCTCAGGTTTTCTACTTCTAAATAGTGTCTTAGTAAATATAACACTTGAGAATAAAAAAGATGAGATAGCAACTATCCTTGATGAGAGGGTCAGTATTTATCGTTTAACTGGAGTTTTTGATGATACTAAGACAAAGGATGGTATAGAATTTATCAAAACTGTTGTGTTAGAGAAACAAAACGAAGCTAAGCCTGAAGAAAATTTAGAAACTGTGAATAGATTTAAGCCATTAAGTGTTGCCGACATCAGAAAAATGGCTGAAAAAGCAGATAAAAAAAACCAAAAAGCAGCTGCTAATGATGTTGATATAATA…
FTT1498c	FLH155117.01X	FtCD00020833	AY774441	accA	Acetyl-coenzyme A carboxylase carboxyl transferase subunit alpha	ATGAATTATTTAGACTTTGAGTCAAAAATAAAAGAAATCGAAGATAAAATTACATCTTTGTCACATGTGTTTGAAGATGAAAAAACAGAGGTTGAGATTAAAAAGCTAAGTAAAAAAAGACTTGAGCTTATGGAGTCCACTTATTCTAAGCTTACAGACTGGCAAGTAGTACAATTATCACGTCATCCTGATAGACCATATTTCAAAGATTTATTACCATTAATTTTTACTGATTTTCAAGAACTACATGGTGATAGAACTTTTGGTGATGACTTAGCTGTTATCGGTGGTTTGGCAAAATTAAACAATAAGCCTGTCATGGTGATTGGTCAAGAAAAAGGTCGTGATACTAAGAGTAAAATAAAACATAACTTTGGTATGATGCATCCAGAAGGGTAT…
FTT1499	FLH153676.01X	FtCD00020672	DQ681628	muts	DNA mismatch repair protein MutS	ATGCTAACAAAAAGATTCTACAATTTAGCTATTATGCAAGATATTTCTAATCACACCCCGATGATACAACAATATTTGAAAATTAAATCACAGTATCAAGATATATTATTATTTTACCGTATGGGCGATTTTTATGAGCTTTTTTTTGATGATGCTAAAAAAGCTGCTGAGCTCTTAGATATTACGCTCACAGCTCGTGGTAAATCAAATGGTGAATCAATCCCGATGGCTGGAGTGCCATATCATGCCGCTGAAGCCTATATTGCAAAAATTGTCAAAAAAGGTCTATCGATTGCTATCTGTGAGCAAACTGGCGATCCAAACACCTCAAAAGGTCCCGTTGAGAGACAAGTGACACGTATTATAACTCCAGCGACAGTTTCTGAAGAAGCTTTTTTA…
FTT1500	FLH155161.01X	FtCD00020838	AY774409	secB2	preprotein translocase, subunit B, chaperone protein	ATGCAAAATAATGAAATCCAACCATCTTTCTTAATCCAAAAAGTGTATACAAAAGATGTTTCTTTTGAGACTATTAACTCACCTGCTTGTTTTAAAGAACAATGGAATCCTAGTTCTGATTTTAATATTGATATAAATACCACAAAAATAAATGATGAAAATTTTGAGCTAGATTTGACTATTACTGTAACCACAAAGAACAACGAAACTAATGCTTATATAGCTGAAGTTACTCAATCTGGAATATTTACAATTACCAGCATGAGTGAAGAACAAATTGATTCTGTACTTAATACATACTGTGCAAATACCCTTTTTCCTTATGCTAAAAGAATAATTGACTCTTCAATAATCAAAGGAGGTTTTTTACCTCTTAACCTTGCACCTATCAACTTTGAT…
FTT1502	FLH231354.01X	FtCD00039314	DQ681629		aromatic amino acid transporter of the HAAAP family	ATGAATAGTAATAGTAATAGTAAAATAAAAATTTTAGGATCTATAATGATTATTGTCGGTACCATGATTGGCGGCGGCATATTAGCTTTACCAATAATTACTGCTAAACTTGGCTTTGTTATAGGCTCCATTCTCATATTCGTAGTTTGGAGTATAATGACTTACACTGCTGTGGTTATATCAGATATCTCTTGCTCGATGCCTTATGGTAGTAGTTTCAAAACTATAGCAGAAAAGTATCTTGGTAAGTCAGGTGGAGTTGTTGCAAGTATTGCTTTTTTGATATTAATGTATTTCATAAGTACTGCATATATCTCTGCAGCTGCATCTTCATTATCGACAACATTCCCAAGTCTTGATGAAAAACTATCATCTTTAATTTTTGTGATTATCTTTGGT…
FTT1503	FLH205178.01X	FtCD00023049	DQ681630	xerC	Integrase/recombinase XerC	ATGACTAATTTAGAGCATATCAATAATTTTCTTGACAACTTACTTTATCTTAAAAACTATTCTCAAGAAACTATTAATAACTATCAAAGGGATCTATTGCAACTAAATCAAGCTCTTAGTGATAAAAATATTATTAGTTTAACTCATAGTGATATATTGATATGGATAAAAAAGCTACATGCTCAAGGCAATTCTCCTAAGACACTCCAGCGTAAACTTAGTTCAGTTAGAAGCTTTTTTAATTTTCTCATAAATAGCGAAATAGTATCACAAAATCCAGCTAACGGTATCAAAGCACCTAAAGATAGCAAAAGACTACCCAAAGTAGTCAACACAGATGAATTGGCATATCTACTAGATATAAATCCAAGCAATGATATTGAAGCTCGTGATATTGCC…
FTT1504	FLH154988.01X	FtCD00020818	AY774415		hypothetical protein	ATGCAGATATATATTTCTAACTTAGATGTAAAGAATCACCTTGATAAATTTATAGAAGATAGATTAGAGTATGAGTTTTGCAAGCAAGATAAATACTTATACCTTGAAAATGATAATCTAAAACTTCATTATAATAATAAAGAATTATTTATAGATTTTAATGATAGTGAAATCTTAAATAGAATAAATCCTAAAACTAAGAAATGTAGTGTTGTACAGGCAATTGAAGGTCGCTCTAAAGCTAAGCTTACCATCCTTGATACTACAGCAGGATTAGGTAGGGATACTTTCACATTAGCTGCTAGAGGCCATACTTTACTAACTCTAGAAAAAGATTCTTATCTATATCTACTACTGAAAGATGCTTTACAAAGAGCTCAACAAATAAATTATTTGAAA…
FTT1505c	FLH155268.01X	FtCD00020855	AY774427		hypothetical membrane protein	ATGATTACTTTAGGTTATGTTATTTATGACTGTATTGCTAATGCATCTATATTGATATTTGCTTTTTTACTTTATAAAAAAAATAACTATGCATGGTTATTTGTGCTAGCTAGTTTAATTATAAAGGTATTTATTTATGGCAAGTATGGAATATCAACATCTCTGATCTACTTATCTGCACAGCTACTAACGGCTATCTTAGCAGCTATTATTTGGTTAAGAAACCCAACATATGTCAAGGTATCTAAACAAAAGAAATTGTTAGTAATAGTTATTGCGTTAATTATTTTGGCTATATGGATTGGACTGATGTATCAATATGTAAACCCTTATATATTGAATTATGAGTTACTGTTTGGTTTTGATTATTTATGCTATATGCTAGTGGTAATAGGTGGA…
FTT1506	FLH155230.01X	FtCD00020848	DQ681631		hypothetical protein	ATGAGTTATCTACAGCGTCTGTATTTACTAACATTCATAGCAGCTTTGGCTAATACAGCTTATGCTAATGAAGATGATAATGTTTATACTTGGCGTGCTACAAATGGTACAGTAGTCTTCTCACAAACGGCGCCTATTTTTGATCAAGAATATCAAAGAATTGGTGTTTACCATAAAAACCAAATCGAACAAAAAATTCCAGTTGAACAGCAACTTACTTATCTAAAACACAATGATCTTTATTTAGATAACGAAAATCCACAAGCAACAACAACTCAAGCAACTAATCAATCAGAGACTGTTAAAGTAAAAATTATCTCACCAGCTAATGGTGAGAGTCGATTTGTGCATAATGAAAAATTAACAATAATACTTGAGCCTACTTTAACAGCTGAAGAT…
FTT0385	FLH204764.01X	FtCD00022947	DQ681632		hypothetical protein	ATGAGAAATACTATCAAGATAGTCATTTTATTGAGTCTTGGAATGTTACTACAAAATTGTGCTACTAGTGATGTTGAAAATGATTTTTCTTATGAGAACTTGACAGATACTATAAGTGGTTCACCATTTAGAAATAGGAAGTATGATTATGCAAGAGTAAAAGTATCAGAAGAGCCAGCGCTAAAAATTCCAACAGGACTAAATGGTGAAAAGATAAAACCAGCATTGAAACTTCCAGATGGTGATAATAATTATGCTAGATCACAAGTAAATGAAGCACAGAAGCAAATGCTACCACCAAATTACGCAGATAAATTTGATATGGAGAAAATTATTAGTGATCAAATATCGAAAGTTTCAATCAGTATTGTCTATGATGATACCGGGTCATTAAAGCTT…
FTT0386	FLH231499.01X	FtCD00039380	DQ681633	nadM	Nicotinamide-nucleotide adenylyltransferase	ATGTATGATATTTCAGTTTTTATAGGAAGATTTCAGCCTTTTCATAAGGGTCACTTACATAATATAATAATAGCGCTACAAAATAGCAAAAAAGTTATAATTAATATTGGTAGTTGTTTTAATACACCAAATATAAAAAACCCTTTTTCTTTTGAGCAAAGAAAACAGATGATAGAGAGTGATTTACAAGTCGCTGGAATTGATTTAGATACTGTAGTCATAGAGCCTTTGGCTGACTATTTTTATCAAGAACAAAAGTGGCAGGATGAATTACGTAAAAATGTCTATAAGCATGCTAAAAATAATAATAGTATCGCTATCGTTGGGCATATTAAGGATAGTTCTAGCTATTATATAAGAAGTTTTCCTGAATGGGATTATATAGGAGTTGATAATTAT…
FTT0387	FLH156285.01X	FtCD00020958	DQ681634	glmU	UDP-N-acetylglucosamine pyrophosphorylase/glucosamine-1-phosphate N-acetyltransferase	ATGGGTTTATCAGTTGTTATTTTGGCTGCAGGCAAAGGTTCAAGAATGAACTCAAACAAACCAAAGGTTTTACAAACATTAGCAGCAAAAACGTTGATTGAGCATGTTGTAAGTTCTGTTGAGAAACTAAACCCAGATAATATAGTTGTTGTTACAGGGCATCTAAAAGAGCAAGTTGAAGATGCATTGCAAGGAAGAAATATAACATTTGTCTATCAGCAGCAGCAACTTGGTACAGGTCATGCGGTATTACAGGCATTACCTTACTTAAAAGAACAAAAAGTTCTTATTCTTTATGGGGATGTACCTTTAATTTCAACTGAAGTTTTAGAAAACCTTGTTGATACTACCAATGATGATGACCTTGGCGTCTTGACCGCGTTTGTTGAGAATCCTCAA…
FTT0388	FLH156372.01X	FtCD00020968	DQ681635	glmS	Glucosamine--fructose-6-phosphate aminotransferase	ATGTGTGGAATAGTAGGTGCTAACTCTACAAGAAATGTTACTAATATCTTAATTGAAGGTTTAAAAAAACTAGAGTACAGAGGTTATGATTCTGCTGGTTTGGCAATAATTGATGATAAAAATAATATAGATATATGTAAAGAAGTTGGTAAAGTTATTGAACTAGAGAAATCTGTACATAACTTAGCTAATTTTAAAGGAGATATAGGTATTGCTCATACTAGATGGGCTACTCATGGTAAACCATCTAAGAATAATTCTCACCCTCATGCTTCGGAAAGCTTTTGTATAGTCCATAATGGAGTCATAGAGAACTTTGCTGAGCTTAAAAAAGTTCTTATTAATGATGGTTATAAATTTAAGTCAGATACTGATACTGAGGTTATCGCACATTTGCTA…
FTT0389	FLH204672.01X	FtCD00022885	DQ681636		Acetyltransferase	ATGGATATGAATTTTAATAAATCTCTCTACTATTGCGATATCAGCCTTCAGATAATGACTCAAAATGATTTTGATAGATTATATAGTGTAGCAAAGGACCCTGAAATATGGACTCAACATAATGATAAATCAAGGTCTGAGCTAGATGGATTTAGAAAATATTTTGATGGTGGTTTGAATAATCCGCAAAATTGCTATCTAATCTTTTATAAAAAAGACTTGGTTGGTTCGACGAGGTATTATGAGTATGATTCTAATGCAAAATCAATAAAGATAGGTTATACATTTTATGCTAAGAAATATTGGGGTACAGATCTTAATGGCAAAGTTAAAAAGCTAATGGTAGATTATGCTTTTAAATTCGTTGACGATGTGTTTTTTGATGTTTGGGATAAAAAT…
FTT0390c	FLH204638.01X	FtCD00022865	DQ681637	rpsU1	30S ribosomal protein S21	ATGCTAAGTATTAAAGTAGATGAGCGCAAACCATTTGATATAAGTTTAAGAAACTTCAAACGTGCTTGCGAAAAAGCTGGTATCAAGCAAGAGCTTAGAGATAGGCAGCACTACGTAAAGCCAACAGAAAAAAGAAAGATAGCAAAACGCCAAGCTGTTAAAAGAGCAAGAATTTCTCAGAGAAGAGCATTTATTTAG
FTT0391c	FLH204640.01X	FtCD00022867	DQ681638	cspC	cold shock protein	ATGAATAATAAATCACAAGGTACAGTAAAATTTTTCAATGAGCAAAAAGGATTTGGTTTCATTACGCCTGAAAATGGTGGAAAAGATGTATTTGTACACATATCAAAATTAAATGGTGAAACACTAGCTGAAGGTCAGCAAGTTACTTTTGAAACTCAAGAAGGTAGAAAAGGTCCTGAAGCTATCAATATTGAGGTACTATAG
FTT0392c	FLH156203.01X	FtCD00020951	AY774946		hypothetical protein	ATGCAAATAAAACTAGCTCAACAAACTATTGCCGAACTTTTTAAAGATATAATCCACCCAAGACTTGCTAGCTTTATTGCTTTATCAGAAGAAGTTGGGGAATTAGCAAACGAAATAATGAAGAAAGAAATCTACGAAGAAACTAATGATAATCAAAAAATTAAAGCAGAACTTACAGATGTATTTGTAAGCTTACTTGAACTAGCAAATGTCTATAACATAGATTTAGAAACTGAGTTTATAGAAAAAATCCAAACTCTAGAACCTCGAGTACAACAATGGAATAAAGCCAAAGCCTTACTTAAAGCAAAAAGGACTAAGGTAGATTAG
FTT0393	FLH204713.01X	FtCD00022913	DQ681639	map	methionine aminopeptidase	ATGAGTCAAATAATAATAAAAACTCCTCAAGAAATAGAAAAGATGCGCGTTGCTGGTAGACTAGCAGCAGAAGTTTTAGAGATGATTACTCCTTTTGTTAAAGAAGGAGTTACAACCGCAGAGCTTGATAAAATTTGTCATGAATATATAGTCAAAGAGCAAGATGCATATCCAGCGCCGCTTAATTACCATGGGTTTCCTAAATCAATTTGTGCTTCAATAAATCATGTTGTTTGTCATGGAATTCCAGCTGATAAGAAGCTTAAAAATGGTGATATATTAAATATCGATATTACAGTTAAAAAAGATGGCTATCATGGTGATACAAGTAAGATGTTTATGATAGGTGAGCCATCAGTCATGGCTAAAAAACTAGTAGAAGTTACTCATGAATGCTTA…
FTT0394	FLH156143.01X	FtCD00020944	AY774957		hypothetical protein	ATGCCAAAACAAGTAACTCCAAAACTGGTAAATCAAAAGTGTGATCTTTTAAGATCTCAAAATGAAGAGATTACTGTCAGTAAAGTTAGAAAGCTGATTGGTGAGGGTGTATCTATTATTGATTTAGTAGAAAAAGTTACTTTGTATAAAGAAGATAAAAAACAAGCTTTAGAAGTTGCAGAGCAAGAAATACTAGAGCCTAATCAACCAGTACGTGATGAGCTGCTTGAAATCATAAGAGCTAGTCTAAAACAGTTTGACGTTGATAGAGATGATATTGCTTTTAGTTTACGTAGTGATATTATGCAATATATTCAACAACAAATATCTAATAATATCTCTAAGCTTAAGCATAAGCAAGCTGAGCTTTCTAATAAGAACGATAGCTTAGAAATTTCT…
FTT0395	FLH156055.01X	FtCD00020935	AY774959		hypothetical protein	CTGGCTAAATTTTTGAATATGAGTGCTACAAACTATTATTTGGAAGAAATGATAAAAAATGCTTCTGATCGACTTATATTGATTAGTCCATACTTAAAGCTAAATGACCGTATTAAAGAATTATTAGAAGATAAAAATAGACTGAAAATAGATGTAAGAATTGTCTATGGAAAAAGTGAATTGCAGCCAGCAGAAATAAGTTGGTTAAATGAGCTTACATTTGTTAGAACTAGTTTTTGTAAAAATTTACATGCAAAATGTTATATGAATGAAACATCTTGTATAATCACTAGTCTGAATCTTTACGAATTCAGTCAAATTAATAATAATGAAATGGGTGTGTATATTTCTCGTGATGATGATTCTGAAATGTATCGAGAGACTTATGATGAAGCTCAA…
FTT0396	FLH153788.01X	FtCD00020686	DQ681640	parC	DNA topoisomerase IV subunit A	CTGGATTTATTCTCAAGTTTAGAAAGTACTCGCTCTGTGGCTGAATTTTCCGAACAAGCATATCTAAATTATTCAATGTATGTAATCCTCGATAGAGCATTACCACATATTTCTGATGGTCTTAAGCCTGTACAAAGACGTATTATATACGCCATGAGTGAAATTGGTTTAAGTCATTTATCTAAGTATAAAAAATCAGCACGTACAGTTGGTGATGTATTGGGTAAATATCATCCTCATGGTGATAGTGCTTGTTATGAAGCTATGGTTTTGATGGCACAAGACTTTTCTTATCGTTATCCTTTCATTGATGGGCAAGGTAACTGGGGATCTATAGATGATCCAAAATCATTTGCTGCGATGCGTTATACAGAGTCGCGTTTATCTAAATATGCGGTA…
FTT0397	FLH204698.01X	FtCD00022902	DQ681641	mtn	5'-methylthioadenosine\S-adenosylhomocysteine nucleosidase	ATGAGAAAAATTGCAATATTAGGAGCAATGGAGATAGAAATTTTACCAATTCTAGCTAAGTTAGATAACTATGAAACTATAGAATATGCAAATAACAAATACTATCTAGCAAATTATCAGGATAAAGAGCTTGTAATAGCTTATAGTAAAATTGGTAAAGTATTCTCAAGCTTAACAGCAACGATAATGATTGAGCGCTTTGGTGTTGAGGCATTATTGTTTAGCGGTGTTGCTGGGGGGCTACAAGATTTGAAAGTAGGTGATATGATTGCTGCAACTGCTACAGTACAACACGATGTTGATATCACCGCATTTGGCTATCCATATGGTAAGATTCCTATATCGGAAGTTGAAATTAAAACATCGGCTAAACTTTTAAAACAAGCACAAAATGTTGCT…
FTT0398c	FLH158124.01X	FtCD00021201	AY774495		hypothetical membrane protein	ATGTTTAATAATTATAACCTTTTGACAACAAACCTCTTTGTTGTCTATCTTATTTTAAGAATATTTACTTTTCTACCTAAAAGATTATTATTACTAGCAATACTAATACTTCTTTGCTTTAATTTCATAAGTATAACCTCTGATAATCAGACTATATTTTATTTTGTTACTGGATTTATAAACTATTTTAGTTTTTCTTCGTTTATCTTGCTTATTTTTATCATAGCAACTACATTTGCGAGCAAAAGAATTACTATTTTTCCATATACCAGCATAGCTTTTTTATTAATAATTTTTATATTTTATGGTTCATTCTTTATCGTATCATATAGTCTTTACGATATTGGTTATAGCGCATATTTAGTATTAGCTTGCGTATTTGCTTATGGGCTAATACTA…
FTT0399c	FLH158015.01X	FtCD00021182	DQ681642		BNR/Asp-box repeat protein	ATGAAACATAAACTAAAGCTGGTTTTGCTATTTGCTTTTATTTACTTGATTTTATTGTTAGTTTTCTATTACTATCATATCCAACATAATTACTCTTTTAGCATATCGACACCTAGAAATGACAGTATTACAAAAAACTTAGATATTAAGACTATAGCTAATCTAAAATATTTCAAATATAATCATGCCTCATCGATGACAACTATTGACAATAAACTTTTTATCACTTGGTATAGCAGTGATCAAGAAACTGCACCAAATACTAAGATAGTGGTTGCAGTAGCTGAGAAAGTAGCTGGAAAATGGCACTTTAATGAAATCAAACCAGTTATGAATCGCCAGGAATTCCAATCTATATTTAAGAAACATATCCATCATTTAGGTAATCCAATCATTTAT…
FTT0400	FLH204726.01X	FtCD00022920	DQ681643	slt	soluble lytic murein transglycosylase	ATGATTAATAAAAAGTTCATAACAAGTTGTTTATTGATTTTATCTAGTACTATTGGTTATAGTCTCACGACACAACAAGTTGAATATTCTCAAAAAGCTATAGATGCATTAGCTAAAAAAGATTATAAATCATATTATTATTATAAATCAAAACTCAAAGATACTAGCATTTATCCATACTTACAATATAAAGAAATAAGTACAGATCCAGATATTTTTCAGCAAACAACAATAGATGAGTATTTTAAACAAGACAATAACAGCTATTGGCAAAATCGCCTTAGCGATGATTTAGCGCAATATTATGCTCAAAAACAGGAATGGAAACTCTTTGATAAATATTATAAAGGTGACTTGAGTATATCTGGTAAGTGTTGGAGTATGCAAGCAGAATATGAA…
FTT0401	FLH157871.01X	FtCD00021163	AY774492		hypothetical protein	ATGTTTATTATAGTAATTTCTACTTTTATAATTTGGATAGATGATATTGTCAAACTTGGACAAGTAAGAACTTCATTAGCAAGGTCTGAAAAATATGCTTATGAGAATATTAAAAAGTATGTAAAAGACCCATATATGGGTTGTAATAAATTTACTGTTGTTAAAAAGTTAAAAAGTGTTCCTATTTATGCAGGAAAATATAGTTTTTTAACTGGTATCTCCTTAGAAAATTTAAACATATTATGTGAAAAAATTAATGCTAAAGTATATATCATAAGACGCAATGGTGAGCATTTAATAAGTTCTGATGTGGTAGCTTATGTGAGCTCATCTAAACCTCTCTCTCAAGAAATATTTGATGAAGTAGTTAAGAATTTTATATTCTCTCAAGAAAGAAGT…
FTT0403	FLH158138.01X	FtCD00021204	AY774508	def1	peptide deformylase	ATGATGGTTGTAAATATCAAAATGCAACAAATGAAATCCCAATTTATACAGTATAACGACTCAAACAATAAGGTCTTGTACCAAAAATGTAAACCTGTAGCAGATATTCAAAATGCTGAAATACAAAATATTATTACAGAAATGCATGAAAAAATGCAAGGTAATGGTATAGGATTGGCTGCTAATCAAATTGGTTATCCTTACCAAATATTTATGATAGAGTTTGATAGCTCAAATGCAAGATATCCATTTAGCTTTGATAGTGTACCATATCAGGTGTTTATAAATCCTAAAATTACAAAAGCCTCAAAACAAAGAGTAAGTTTTTGGCATGGATGTTTGAGTGCCTTAGGTGAGAAAAGAGGCAAGCTAGCTACTTATAAAGAGATTGAATATGAG…
FTT0404	FLH158037.01X	FtCD00021186	AY774151	lolC	lipoprotein releasing system, subunit C,putative membrane protein	ATGTTTAAAAGCTTACCACTATTTATCGGATTAAGATATATCCGTGCTAAGAAGCGTAACCGGTTTATATCTATTATATCGGCAATATCATTTTTGGGTATTTCTCTAGGTGTGGCTGTACTTATCACAGTGATGTCGGTTATGAATGGGTTTGATCAGCAGATCAAAAGCAAAATTCTAATGATGGTACCACCTTTAAAAGTGTATCAATTAGGTGGGGAAGTTACTGATTGGCCAAACTTAGCTAAAGAAGTTGAGAAAAGTACTCCAAGTGTTACTGCAGTAGCTCCGATAGTAGAATCACAAGGTTTACTTAGTGCAAATAGTGGTAGTAGCACGACAGCATTTGTACAAATTCAGGGTATAGAACCTAAGTATCAAACCAAAGTACTACCTATA…
FTT0405	FLH157863.01X	FtCD00021161	AY774153	lolD	lipoprotein releasing system, subunit D, ABC transporter, ATP-binding protein	ATGAATGATGTTGTTTTAAGTTGCAAAAATGTTTCAAAAAAATATACAGAATTTAAAACTGATATAGCTATCTTAAAAGATGTAAACCTCGAGATTAAAAAAGGTGAAAAAGTTGCTATCCTTGGATTATCCGGATCAGGTAAGACTACATTGCTAAATGTTTTAGGTGGACTAGATAAATGTAGTGCCGGTGAAGTATATTTGATGGGTGAGAGGTTTGATAATCAATCTGTTAATAAGCGTGCAAAAATGCGTAATAAGCATCTAGGATTTATCTATCAATTACATCACCTATTACCAGAATTTACAGCTATTGAGAATGTAATGATTCCATTAGCTATCACTAAAAAATATACTAAAAAAGAGTCAATAAAACTTGCTAATGAAATTCTCAAAAAA…
FTT0407	FLH157998.01X	FtCD00021179	AY774516	gcvT	glycine cleavage complex protein T (aminomethyltransferase)	ATGCTGAAAACTCCTCTTTATGAATCACATATGGCAGCAAATGCTAAGATGGTTGATTTCTCAGGCTGGTCAATGCCAATTAACTATGGTTCACAAATTCAAGAGCATAATAATGTTAGAGAAGATTGTGGTATTTTTGATGTATCACATATGTTAGCAGTTGATATTCAAGGTTCTGAAGCTGAGAAGTTTTTACGCTATCTTTTAGCCAATGATGTTGCTAAATTACAGGAGAATAAAGCTCAATATGGCTGTATGTTAAATCATGATGCTGGTATTGTTGATGATTTGATTACTTATAAAGTTACAGATGAGCATTTTAGAATAGTTGTCAATGCTGGTAATAGAGAGTCAGATGTTGCATGGTTTAATCAAAATGCTCAAAATTTTGATGTTGCG…
FTT0408	FLH158025.01X	FtCD00021183	AY774485	gcvH	glycine cleavage system H protein	ATGTCAAATATTCCTAAAGAATTAAAGTATACAAAGTCGCATGAGTGGGTCAAAATAGATGGTGATGAAGTCACTGTAGGTATTACAGCACATGCACAATCTTTATTGGGCGATTTAGTCTATGTTGAATTACCAGAAATAGGCAAAGAGTTCGCAGCTGGTGATGATTCTTGTGTGGTTGAGTCTGTCAAAGCAGCCTCTGATGTATACGCTCCTGTTGATGGTGAGGTAATTGAAATTAATGAAGCTTTGGTTGATGACCCTTCACGAGTCAATCATACACCATATAAAGATGGCTGGCTATTTAAACTTAAAATCTCTGATGAATCTCAGTTAGCTGATTTGCTAACAGCTGATGCTTATGCAAAAACTCTTGAGGATTAG
FTT0409	FLH158065.01X	FtCD00021190	AY774503	gcvP1	glycine cleavage system P protein, subunit 1	ATGTCTTTTATCCCGCATAAACTAGAACAAATCAAAAAAATGCTTGATACTATAGGAGCTAGTTCTGTAGATCAGTTATTTGATGAGATTCCAAGACACTTAAGGGCTGATACTCTTAAGATTAAAGATGGTATCAATGAGATTCAATTAGCAAATCTTATGAGAAAGAGAGCTAATAAAAATCATCATAATATAAATTATATAGGTGCTGGTGCCTATAGTCACCATATTCCAGCTGCGATATGGGATATCGTAGCTCGTGGCGAGTTCTATACTGCATATACACCATATCAAGCAGAGGCTTCACAAGGTGGTTTGCAAGTTATCTATGAATTTCAAACTATGATGGCAGGGCTAACAGGTATGGATGCCTCAAATGCGTCTATGTATGATGGCGCA…
FTT0410	FLH158087.01X	FtCD00021194	DQ681644	gcvP2	glycine cleavage system P protein, subunit 2	ATGGTTATTTTTGAAAAGACTAGAGGTAAAAACTCGCCATCTGTAATGCCTAGCAAAAAAGGAGATGTTTCAAATATCCCTACAGATATGCTACGCACTAAGAAACCAATACTTCCAGAGCAAGCTGAGCTAGATGTTGTTAGACACTATACACAACTTTCGCGCAAAAACTTTTGTATAGATACAAATTTCTATCCACTAGGTTCTTGTACTATGAAATACAATCCTAGAGCTGCTCATAAGTATGCTTCATTAGCAGGTTTTTTAGAAAGACATCCTTACGCAAGTGCTCAAAGTGTCCAAGGTACTCTTGAGTGTTTATATGACTTACAAAACTTAATCAAAGAGCTAACGGGTATGACAGGTGTATCATTAGCTCCTATGGCTGGTGCTCAAGGT…
FTT0411c	FLH157940.01X	FtCD00021170	DQ681645	aroE2	Shikimate 5-dehydrogenase	ATGTCAGATTTATTTAAAATCCCTCTAAACACTAAAACTAAATTATTATTCTCAACATCTGGAAGTAATTCATCGATACAACGCCATAATACTGCGATACAAAAACTTGACTTTAATCTTTGTTATTTTACTTTTAGTGGAGAAATTTCAGCTCAAATCTATACTGATGCTATTAGAGCCCCTTTTGTAAATGGTGGTACTGTCACTGCTCACAATGGCCTTAAATCTAAAGTAATTCCATTTTTAGACTATGTTGAACCACTTGCTAAACAAACCTTGGCTGTAAATACTATTATCAACAAAGATGGCAAACTTTATGGTTACAATACTGATTGTTATGGTTTACACACTGCACTTACAAAAGGTATCAAAGAATCTAAACAAGATATCAAAACAGCT…
FTT0412c	FLH153810.01X	FtCD00020689	DQ681646	pulB	pullulonase	ATGCAAGCAACAAATCAAAATATATGGATACAAGATAAATTTGGTAATTTCACCCACCTTAATGCAACTCATCAGGTTTATCTGGATTTTGAGACTAATAGTATTAGGTTTCGCATCCAAGCTGATGGTTTTTTACATGGTTATGTAATTGCCAACTTTAACAATTGGCAAAAACTTGAAGAGTATAAACTTACATGGACTACAGATAATGATGATGGTAGTTTGTGGTTAACTAAAGATGTTTTTAATATATCTACTCTTAATGCAGGGACAAATCAATACTCATTTATCTTAGTAAGCCTAGCTGGTGAAGAGTTTAAGGTTTCTATTAATGATCATGATTTGATACCACTTAGCTTTAATTGGCAAGTAGCAAAAGGCACTCTTGAAATCAAAGCT…
FTT0413c	FLH158152.01X	FtCD00021206	DQ681647	glgB	1,4-alpha-glucan branching enzyme	ATGACAAATAAAAATTCAGATCAAAATACTCACTCTACTATTGGCGAACAAGATATTCATTACTTCCATGAAGGTAAGCATATATATGCATATGAATTTATGGGGGCTCACAAAGCATGTGAAGAAGGGATTGAAGGTATTAGATTTACAACATGGGCTCCAAATGCGAAAAGTATTTGTGTTATAGGTGACTTTAACTATTGGCAAGTTGAAGATAAAAACTATATGGAACCTATCACTGATGCTGGACTATGGAGTGTTTTTATCCCAAATGCAAAAAATGGTGATAAATATAAGTTTGTAGTAACTAATAAAGATACTAATCATTATGTCTATAAAAGCGACCCTTACGCTTTTTTCTCTGAACTAAGACCAAATACAGCTTCTATAATCACTACT…
FTT0414	FLH204712.01X	FtCD00022912	DQ681648	pgm	Phosphoglucomutase	ATGGCGATTCAAACTGTATCAACTAAACCTTTTGCTAATCAAAAACCAGGTACATCTGGATTACGAAATAAAGTCATAGCTTTTCAACAGCCCAGATATTTGGAGAACTTTGTACAATCTATATTTAACTCATTGGATGATATAGAAGGTAAAACTTTAGTTGTTGGTGGTGATGGTAGATATTACAATGATGTTGCAATACAAATTATCGTCAGAATGGCAGCAGCTAATGGTTTTGCTAAGATAATAGTTGGTCAAAATGGTATATTTTCTACTCCAGCTGTTAGTTGTGTTATCCGAAAATATGAGGCTTTTGGTGGGATTGTATTATCGGCAAGTCATAATCCGGGTGGTCCAAAAGGAGACTTTGGTATCAAATATAATGTTTCTAATGGTGGT…
FTT0416	FLH154214.01X	FtCD00020737	DQ681649	glgA	glycogen synthase	ATGCGCGTTTTACATGTATGTAGTGAATTATATCCAATTCTAAAAACAGGGGGTCTTGCAGATGTTACAGCTGCTTTGCCTCCTGCACTAGCTGGTTTTGGGGTTGATAGTAGGGTTTTGGTTCCAGGATTTCCAGCATTTATAAATGCTATCAAGGATAAGCAGCTTTTGATTAATATTCCTTCTCGCTTTGGTGCAGAAGAGATAAATATATTTTTAGCTAAGATTTCTAATACCAAAATTGACATATATGTAATAGACGCTCCTAGTCTATTTGCTCGTCCGGGTAATCCGTACGCAGATAGTAGTAATCAAGCTTATGCAGATAATTATCTTAGATTTGCTTTATTAGGTTGGGTAGCGGCAAGAATTTCTGAAGGCTTGGATGCTAAGTGGAAG…
FTT0417	FLH153806.01X	FtCD00020688	DQ681650	malP	maltodextrin phosphorylase	ATGTATGAAAAAAATCAAATTAAATTACACCTTGAAAAAATACTAAATTGTGATGTAAGTGCAGCAAATGATCAAGATTTATATTATGCGTTGTTGACTTATGCTAAAGATCAGACTGCAAAACTTCCAGAACAGGATTATAAAAAGAAAATTTATTATATTTCTAGTGAATTCTTAATAGGTAAAATGCTAATTAGCAATCTGATAAATCTAGGTGTGTATAATGAAGTCTGTCAAATACTAAAAGAAAGTGGCAAAGATATTGTACAGATTGAGGAATTTGAGCCAGAGCCATCACTTGGTAATGGTGGTCTGGGTAGATTAGCTGCATGTTTCTTGGATTCTATAGCATCACTAGGTATTCCTGGAACAGGTATTAGCTTAAATTATCATTACGGT…
FTT0418	FLH154205.01X	FtCD00020735	AY774632	malQ	4-alpha-glucanotransferase	ATGCGAAAAGCTGGATTAGTATTAGCTATTTCAAGTTTACCTAGCTGGTTTGGCATTGGTGATTTGGGTAAAAGTGCGTATGAGTTTGTTGATATTTTAAAACAGGCTAGTATTAGAATTTGGCAGGTTTTACCTCTTACAACACTAGGTTTCGGCAACTCTCCATATCAGTCAAGCTCTTCTTTTGCTGGTGATGAAATCTACATTAGCTTAGAAAAACTAGCAGATTATGGTTTGCTTGAAGAATCATCTCTTAAAAAACTAAATGCAAACTCTAAAAAAGTTGAATATGAACTTGTTCGTAATTTCAAAGATAACTATCTCGAAGAAGCATTTAGTAATTTCCAAAGCTCAAAAGATAAGTTTGAACAAGAGTATAGTGATTTTATAACTCAGAAT…
FTT0419	FLH153976.01X	FtCD00020703	AY774608	glyQ	Glycyl-tRNA synthetase alpha chain	ATGAAAATTTTAATTAGTATGCTTACATTTCAAGAAATTATTTTAAAACTACATCATTATTGGGCATCTAAAGGTTGTGCAATTGTTCAGCCGTTGGATATGGAAGTAGGTGCTGGAACTTTTCATCCAGCGACAACTCTACGCGCGATAGGTCCAGAGCCATGGACAGCTGCGTATGTTCAGCCATCAAGAAGACCTACAGACGGTCGTTATGGTGAGAACCCTAACCGTACGCAACATTATTATCAATACCAAGTTGTTATGAAGCCATCTCCAGATGATATCCAAGAGTTATATCTTGGTTCACTTAGAGAGCTTGGCATAGATCCACTAGAGAACGATATTCGCTTTGTTGAAGATAACTGGGAGTCGCCAACTTTAGGTGCTTGGGGACTAGGT…
FTT0420	FLH204701.01X	FtCD00022905	DQ681651	murE	UDP-N-acetylmuramoylalanyl-D-glutamate--2,6- diaminopimelate ligase	ATGAAACGTATAAACCAAATATTAAAATTTCTAGATATTAAAACTTTATCTCAAAATAATTTTCAAATTGAGTCTCTATATTTAGATAGTCGTAAATGTGATAAAAAATCAGTGTTTGTAGCTCTCAAAGGTCTATCAACTGATGGTAATAAATATATTGATAGTGTTTTAGCTAAAGGTGTCAGTTTAGTATTAACAGATAGTCATGAATTTGAAGACCAGAAACGTGTTTTTTATATTCAAAATTTAAAAGAGAAACTATCGACCCTTGCAAAATGGTTTTATGATTATGAAAAACCACAAAATATAATAGGTATAACTGGCACAAATGGTAAAACTTCTATCTCTAGTTATATTGCTCAATTTTTAGATTTAAGTGCACAAAAAACGCTACTTTTA…
FTT0422	FLH204687.01X	FtCD00022894	DQ681652	murF	UDP-N--acetylmuramoylalanyl-D-glutamyl-2,6- diaminopimelate-D-alanyl-D-alanyl ligase	ATGATAAAATCACTAAAACAATTAGCAATCCAAGCAGGCTTAGAATATTTGGGTGAAGATGTATCAATACAAACAGTAGCTATAAATTCAAATGAAGTAAGACAAGATTGCTTATTTGTTGCAATTGTAGCTAATCGTGATGGACACGAGTTTATTCCAAGTGCTATTGCTAATGGCGCTAAAGCTATTTTAGTTTCAAAAAAACAAGGTTTAGATATTCCACAAGTAGTTTGTGGCAATACTATCAAAGGCTTACGGGCTTTAGCTAAAGAATATCGCAAATCACTAACTATGCCAATAATATCTTTAACTGGGAGTTGCGGTAAAACATCTGTTAAAGAAATGATTGTAACTCTTCTTGGTGAGAGAAAAGTTCATTTTACTCAAGGTAACCTAAAT…
FTT0423	FLH153916.01X	FtCD00020696	AY774625		hypothetical protein	ATGAAAAGACTTTTTGCAATATTAGTTTTTGTATTACTTGTAAGCGTATCTTTTGGTAAAGATATCATAAAGTATCCATTAATTGAGTCAAATGTACTTTGTGATTCTGTAAGACCATTTTGTGGCGATAACTGTAGTAATATGCCTTTTTATCCGACCTTATGTAAGCCAACTGAATAG
FTT0424	FLH204666.01X	FtCD00022882	DQ681653		hypothetical protein	ATGCCATGTAAAGTAAGCGAAGATGGAAAAACAGCTAATTGTAGATGTAAAGTTTTCACAGGTCCTAACTATGTCAATATTGATGGAATTATGAACTTAGGTGTTTATTATAAGACGGTGGCAGTTTGTGGTAAAGATGGCTCAAAGTGTAAAAACCTTTTTACTTGTCTACCGGATGGTAGTGGTGATTGTAAAGGAGTAGAAGCTCCAGTATGTAAATATATAGCTAATCAAAATACTCAAGATGATAGTATCTCTTTTATCCCTGGTGCTGATTTAATTTCAACTTATGGTTTTGATATGAATAAAGACTATGATATCGCAAAACCTGGTGAAGGAGTTAAATGTCAAAATATTGATGTAGCAGGTTGTATGACTCAGCCATGTAAATATGAAAAA…
FTT0425c	FLH231466.01X	FtCD00039365	DQ681654	asd	aspartate semialdehyde dehydrogenase	ATGCTTAAAGTTGGTTTTATTGGTTGGCGCGGAATGGTCGGCTCAGTTTTAATGTCTCGTATGATCGAATCAAAAGATTTTGATTGTATTTTGCCAACGTTTTTTTCGACATCTCAGGTAGGGCAGCTGCCAACAGGTTTTATGCAACAATATGGAGCGTTACAAGATGCCTATAGTATCGACCAACTAAGTAGTATGGATATACTTCTAAGTTGCCAAGGTGGTGAATATACCAAAGAAATACACCACAAATTAAGAGAAGCCGGCTGGCAAGGTTTCTGGATAGACGCTGCATCGACACTACGCTTAGACAAAGATAGTACTCTAGTTCTAGACCCTCTAAATCACGATCAAATAATTAATGCTATTGATAATGGTAAAAAAGATTTTATCGGTAGT…
FTT0428	FLH154109.01X	FtCD00020721	AY774630	thrC	threonine synthase	ATGAATTTTGTTAGTACTAGAGATAAAAATATTAAAGTTTCACTAAGTGAAGCGATGCAGTCTGGATTAGCTCCTGATGGAGGATTATTTGTCCTAGAGAGATTTCCTACAGTTAATTGGCAGAGTTTTGCTAAAGATATCAGTTACGCGAAGTTTGCTGCTAATACTCTAAGAGAATTCTTTAAAGGAGATCAGCTAGAAGACTCTTTAGATAAAATTTGTAATAATGCTTTTACTTTTGAGGTTCCTGTAAGAAGATTAGATAAAACCACATCAGTTTTAGAGCTTTTTCATGGTCCAACTTTATCTTTTAAAGATTTCGGTGCGAGATTTTTAGCAAACTGTTTAAGCTCTATCGATAGTGAGAAGCCATTTACTATTTTAGTGGCAACTTCTGGA…
FTT0430	FLH204662.01X	FtCD00022881	DQ681655	speH	S-adenosylmethionine decarboxylase	ATGAGTTCAGGTAAATGGCCTGAGCATAACAATCAAATCTGTGATAACCTTCATCAAGATCATTTTATTCAAGAAAGTGTAAGGTACGCGGGAAATCATTTAATAGTCGACTTTTGGGGTGCTAGTAAATTAGATTGCCTTGAGACTATGGAAGTAGCAATGCGTGAAGCAGTTGAGAAAGCTAAAGCAACATTGTTACACATTCACCTTCACCATTTTACACCTAATGGCGGTATTTCTGGAGTTGCTGTCTTAGCAGAATCACATATAAGTGTTCACACTTGGCCTGAGTATGGTTTTGCAGCTTTTGATATATTTATGTGTGGAGATTCTAAACCTAATAAAGCAATAGAAGTTTTAGAAAGTTATTTTAAGCCTAAAACAAATAATGTAAGTAAG…
FTT0431	FLH157568.01X	FtCD00021127	AY774445	speE	spermidine synthase	ATGATAGCTAATATTAATAATAAAAAAATATTTCATGAAACTTTGTACCATAGCTATCATCAAAGTATAGCAATTTCTGAAATATTGTATGAACATAAAACAGATTACCAACATCTAGTAATTTTTAATAATCCAATTTTTGGTAATGTCATGGTCTTGGATGGTATTGTACAGACTACTGAAAAAGATGAGTTTATTTATCATGAAATGTTAGTGCATGTACCAGTTATCGCGCATGGGAATGTTAAAAACATATTAATTATTGGTGGCGGCGATGGTGGTATGCTTAGGGAAGCTCTTAGTCATAAAGCTGTCGAATCTGTAACACTAGTTGAAATTGACCAAGCTGTTATAGATATGTGCCAAGAGTACTTTCCAGGGCATTCAAAAGGTGCTTTT…
FTT0432	FLH204695.01X	FtCD00022899	DQ681656	speA	putative arginine decarboxylase	ATGAACAAAAATTTATTTCTAACAGCTAATCTATCAGAGTATTTTAGCTATAATAGTTTAGGTCAATTATGTATCAACTATGCTGATGGTTATAGAAAAACTATTCCTATCGTCGATTTTTTGCAACAGGCAAACTTTCAGGGAGCTACATATCCATTGGTTTTATATTTTGAGCATATCTTAAAAAACCAACTTGATAAACTTTATACTAGTTTTGGAAAAGCTATAGATGATTTTAGCTATACATGTAAATATAGTTTAGCTTATCCGATAAAAGTAAATCCTGAACAAAAGATTATAAAGGCAATTTATGATTATCATCAACATAATCAAGTTAGTTTGGATTATGAGGTAGGTACTAAATCTGAGTTTTTAGCTGTGCTAAGTACAGCAGCTAAA…
FTT0433	FLH204636.01X	FtCD00022863	DQ681657		hypothetical protein	ATGTTAGATCAATATGGTTATAACTCTCTGAGGATACAGTCAAATTTAAAAAGATACTATTATTATCACCAAGAGGAGATAAACCAAGAGGAAGAAGAATTTTTAGACAATTTATTTATTGATAATCCATATATGGGCGAGATAACTAGTCAACAAGGAGGGATAAATTATGCTATTATGGCCGGCTAG
FTT0434	FLH154010.01X	FtCD00020709	DQ681658		hypothetical protein	ATGCTATTATGGCCGGCTGAATGGGAGGAGCATAGTGCAACTTGGATGATCTGGCCAGCACGTATAGATATGTGGCCAAATATAACAAAAGCCTATGAGATATATGCTAAAGTTGCTAACACTATCGCTAAATATGAGCCTGTAAATATGGTAGTAAATCAGCATCAGTTAGATATTGCAAAAAAATATCTTGGAAAAAACATGACCCTGATAAGTGAAGCAGTAGATGATAGTTGGGCTAGAGATATTATGCCAATTTTTTCATTTAAAGCAGATAAACTCATTGCAAATAATTTTGATTTTAACTGCTGGGGTAATAAGTTTTCACCTTTTGATAACGATAGAAGACTTAAAAATGATATTGCAAAACAACAAAAATGGCAGGTTAATTCTTCTAAA…
FTT0435	FLH153929.01X	FtCD00020697	DQ681659		Carbon-nitrogen hydrolase family protein	ATGGCGAATATAAAAGTTGCAGTTGTCCAATTATCTTTTAATGATAATGAAGCTGAAAATTTAGCAAAACTGGAGAGTAAAATTATTCAAGCAGCTAAAAATGGTGCAAAAATAATTCTTACTCCAGAGTTACCAAGTTATCTATATTTTTGCAAAAAACAAAATTCTAAATATTTTGATTTAGCTAAAACCATTGATGAATCACCAATAGTAAAATTATATAAACTCTTAGCACATAAATATAATATTGTTTTGCCTGCTAGTTTTTTTGAGAGAGATGGAAATGCTTGTTATAACTCGATAGCAATGATTGATGCGGATGGTTCGATAATGGGTGTATATCGTAAAGCCCATATTCCAGACGGTATTGGTTACCAAGAGAAATATTATTTCTCACCT…
FTT0436c	FLH153883.01X	FtCD00020694	DQ681660	lpxH	UDP-2,3-diacylglucosamine hydrolase	ATGGCTCATAATAAAGATATTTATCTAATTTCGGATCTTCATCTAAACGCTAATCATGCTGAGATGGCTGATCTTTTTAAAAAGTTTTTAGATAGCATTACATCTACACAAAACCAGCTTTTTATTCTTGGTGACTTTTTTGATTATTGGATCGGTGATAATCACAGAGATGACTTTTATCATAAAATCACAAATTGGCTAAAAGAAGCTTCAGATCAAGGTTTAGAAATATTTTTCATGTATGGAAATCGTGATTTTTTGATTGGCAGAAAATTTGCTAAACAAAGTGGCGTGACTTTAATTAAAGATCCATACTATATAGATATCTCTAAGCAAAAAATACTTTTCTCGCATGGAGATCTATTTTGTACAGATGATAAGAGTTACCAAATTTACAGA…
FTT0437c	FLH154185.01X	FtCD00020731	AY774618	pyrE	orotate phosphoribosyltransferase	ATGTTTATAGAGTTTGCTCTTAAGAATCAAGTACTTAAATTTGGCGAATTTACGCTTAAGTCAGGACGTATTAGTCCATATTTCTTTAATGCTGGGCTATTTAACACAGGCGCTCAACTTGCAACGCTTGCTGATTATTATGCTCAACTGATTATCAAAAGCGATGTCAAGTACGATATCCTTTTTGGTCCAGCATATAAAGGGATTCCTCTAGTTGCAGCTATTTCTACTGTATTAGCTCTGAAGTATAATATCGATATGCCTTACGCTTTTGACCGTAAAGAAGCGAAAGATCATGGCGAAGGTGGTGTATTTGTTGGTGCTGATATGACTAATAAAAAAGTATTACTCATAGATGATGTAATGACTGCAGGTACAGCCTTTTATGAATCATACAAC…
FTT0438	FLH204689.01X	FtCD00022895	DQ681661	mpl	UDP-N-acetylmuramate:L-alanyl-gamma-D-glutamyl-me so-diaminopimelate ligase	ATGTCAAAACATATTCATATTTTAGGTATCTGTGGTACTTTTATGGGTTCTTTAGCAGTATTAGCTAAACAAAAGGGATATAAAGTAACAGGTTCGGATCTTAATGTCTATCCACCAATGAGTACTTATCTCGAGTCTCAAGGCATAGAGATATTACAAGGATTTGATTGTGATCAACTAGATACAAATCCTGATGAAATTATTATTGGTAATATCATGAAAAGAGGTATGCCAATAATAGAAAAAATCCTCGCAGAAAAGTTAAACTATTTCTCAGGTCCAGAGTGGCTATATCAAAATATTCTTAAATATAAAAAAGTAATTGCAATAGCTGGTACACATGGTAAAACTACAACCACTACAATGACTATCAAAATACTAGAGCAGGCTGGCTTAAAT…
FTT0439	FLH154209.01X	FtCD00020736	AY774633	yjfH	tRNA/rRNA methyltransferase	TTGAGTAGTTTAATTTATGGTATTCATGCTGTTGATAGTTTGGTAGAAGCTAATCAAGCAAAAGAAATATTGGTATTTAAGAAGTCAAATGCCAATCATAAGATCGAAGGTATTATCTCTAAAGCTGAATCAAAAGGTTTAAAAGTTACTTTTATTGATAGTTTTAAACAGCTTCCAGGGCGAGTCAGAAAAGATGCAAATCATCAAAATATCTTTGCAGTAGAGATAAATGATTTTAAAACATATTCTGAGAATGATATTGAGTTTCTAGTTCCTCAGGATAAAAATGCTTTTATTTTAATATTAGATAATGTTCAAGATCCTCATAATTTTGGTGCGTGTATACGTAGTGCACATTCTGCAGGTATTGATTTTATAATTATCCCTAAAGATAATAGC…
FTT0442c	FLH154886.01X	FtCD00020807	DQ681662		major facilitator superfamily (MFS) transport protein	ATGATTAAACAAGATAGTAAGCTTTTTATTCTTACACTTGGGCTTTTGGCAATGCTACCACCATTTGCAGTCAATACTTATGCTCCAGCTATCCCAAATATTGCTGAGCATTTTGGAATTCATCCAAACGATGTAATTTTCACCTTTACAACATATTTTATTGGCTTCTCTATAGGGATGCTTTTTTGGGGATCTTTTTCAGATAAGTTCGGTAGAAAGCTTAGTCTAATTTTAGGTATGTTTTTATATGCTGCGAGTACTTTATTATGTGCCCATAGCCAAAGTTTTTCACAACTTGCTGTTTTTAGATTGATACAAGGTTTAACAGACTCCTCAGGTACAGTGATTGCTTTAGCAATTGCTAGAGACTGCTATAGTGGTAAAAAACTAACAAATATC…
FTT0443	FLH154840.01X	FtCD00020799	DQ681663		conserved hypothetical membrane protein	ATGCAATTTGCTTTTTTAAACAGTAATAAATATGCCGCGATAAATGCCTTTAAAGCTTGTATAGCTATAGTTATAGCTTACTTAGTAGGATCTTTTTTAGGTCGTATATTTGGTATAGAGCGAATGTATTTATGGATGTCTGTTACCGTTATGGTTGTAATGTCGACGCAACCTAATTTAGGTGGTGCAGTAGATAAAGCTTTGATGAGGTTTCTAGGCACAGTCATAGGCGCTGTAATTGCGATAATAATCGTTGCGTGTGTAAAAAACTATATTCATGAATTTCTGTTGATATTACCATTTATATTTTTAGCAGTATATTTTGCTGGTGCAACTAAGTATAGTTATGCTGGTACATTAGCTGGGATTACATTAATTATTATAATGTTTAATCAACAG…
FTT0444	FLH204683.01X	FtCD00022891	DQ681664	tet	multidrug transporter (tetracycline resistance protein)	ATGAGGTCTACAATGAAATTGCGTACAAAAAATATTTTAATTCCGGTACTTATTACAACAATTATCATAGACATAATGGGTGCGGGACTTGTTTTTCCTATTATGCCATCGTTATTTTTTGGACAATCATGTATTACTTTTGGTGATCCAGGTAGTAACTTTCAGAACTGGTATTATTCGATAGCCTTAGCATGTTGGCCATTAGGATTAATGATTGGCTGTCCTATTATTGGTGAATTATCGGATAAATATGGACGCAAAATTATACTAATCGTTGCTTTATCAACCACATGTGTATCATATATTTTATCAGCATATGCGATATACTCACATCACTATCTACTATTTGTAGCAAGTAGATTTGTTTGTGGGTTAGCTGGAGGAGCTTTTGAAATTGCT…
FTT0446	FLH231480.01X	FtCD00039372	DQ681665		Proton-dependent oligopeptide transport (POT) family protein	ATGTTTAGTATAAATATGACTACCAAAGACATGAATCTTAGAGATCTTAGAGAAGAGAAGAAAGTTTTAGCAATTACCTCATTAGCTGAGTTTGCTGAGCGTTATGGCTATTATATAATTCAATCATTATTGATATTTTATTTAATAGATAAGTTCCAAATTTTTCAAGATTTATCAGCATCTTTAGTTGGTACAACTCTTTCAATGGTTTATATCTCAGCTATTCTTGGTGGTTTTGTTGCTGAGAAGTATTTAGGTTACTATCGTGCTGGTTTATTAGGTTCACTTTTTATGTTAGGTGGATTTTTTATATTAGCGTATTCAACTAGTCAGAGTATGCTATATTTAGGATTAATTTTTGTTTCTGTTAGTACTGGTCTTATAAAATCAAATATGTCA…
FTT0447c	FLH153465.01X	FtCD00020645	DQ681666		conserved hypothetical membrane protein	ATGTTATCAAACTCAAAGAAAACTATTATATGTGGTTTTTCTTTTTTTTGTATCTGGATATTTGGAACTCTAGCCTTATACAGTAAGTATTCGCTATATGTTGATGTTTTAGAAAATATCAAATGGTCACATCACCTAAGTATAGTTTATGACAAACATCCCATCATGGGTTCTTTACTAATAAAGCTCGTACTGTATGTAACTTCTAACCTTATGTTAGCTGGACTCATATGTAGTTGTATATGTATGCTTATAGCAATAGTTTTTTTATATAAACTTTTAAAGTTATATTTCAATCAAAATACAACTTTGTTTTTAATAATACTAGCACTGTTATCAAGCATATTTGGTGATTATAGTTTTGTACAGTTCAACCAAAATGTAATCCTTTTACCTTTT…
FTT0448c	FLH153545.01X	FtCD00020657	DQ681667	glnS	Glutaminyl-tRNA synthetase	ATGACTAGTGAAATTAAAGTAAATAAAACTAATTTTATAAAAAATATCATTAAGAAAGACCTCGAAACAAACAAAGTCTCAAGTATTTTGACGCGTTTTCCTCCTGAGCCTAATGGTTATCTTCATATTGGCCATGCAAAATCAATATGTCTTAATTTTGGTATTGCACAAGAATTTGATGGTAAGTGTAATCTACGCTTTGATGATACTAATCCTGATAAAGAAGACATTGAGTATATAAACGCAATCCAAGAAGATGTCGAGTGGCTTGGTTTTAAATGGGAAAATCAACCACGTTTTGCCTCTGAATATTTTGATAAGATGTATGAGCTAGCTATATTGCTTATAAAAAAAGGCAAAGCTTATGTCTGCGATTTGTCAGCAGAAGAAATACGCGCG…
FTT0449	FLH204710.01X	FtCD00022911	DQ681668	pckA	phosphoenolpyruvate carboxykinase	ATGTTAATGGATCCTTCAACCATAGATGAGTATAAGTATCTATATACTTGTGAAAATGTGCATAAAAATCTCTCTCTCCAAGAATTAGCAAAATACGCACATAATAGTGATGGTTTTATTTGCTACGATAATAAAACTTTAGTAGTTGACAGTGGTGAAATCAAGGGTCGACTTCCTGATGATAAATATATTGTTGAGACTAAATATGCCAAAAAAAATATTTGGTGGAGTGAAAATGGCTCAGATAATAAAAGATTAAAAAGAAAAAACTGGAAGCTGATTAAACAAAGATTATGTCAAGAGGTAGCAACAAAGGATCTTTTTGTTGTAGATGGTTTTTATAATCATGATGAGAGATATACCATAGCAGTTAGACTAATAACTACCCAAGCTTCAGCT…
FTT0450	FLH153497.01X	FtCD00020651	AY774660	mraY	Phospho-N-acetylmuramoyl-pentapeptide transferase	ATGCTGGTTTATCTTTTTGAATGGTTAAGTCATTATTTCAAAGGCTTAGAAGTTTTTAGTAGTTATATATCTGTTAGAATAATTATGATTTCGATAACATCGTTACTCATTACTCTTGCACTAGGTAGACCTATGATCAGCTGGTTACAAAAAATGCAAATAGGTCAAATTGTTAGAGATGATGGGCCACAAAGTCATTTCTCTAAAAGAAACACTCCAACAATGGGAGGCGTTTTGATCCTTTCATCAGTTATTATTTCCTGTTTGCTTTGGGGGGATTTGACAAGTATATATTTATGGATTTTAATTTTAGTGGTTATTTTCTTCGGAGCGATTGGTTTTTTTGATGATTATTTGAAGCTAGTACTTAAGCATCCAAAAGGTTTAAGAGCTAAGTAT…
FTT0451	FLH153442.01X	FtCD00020643	AY774679	murD	UDP-N-acetylmuramoylalanine--D-glutamate ligase	ATGTTTAGTTTTTATTTTAATGATAACAAGATAACCAAACTATTAATGGTTGGTTATGGTTCTACTGGTAAGTCTGTTTGTGATTTTCTTGCGAACTTTATAGATATTACAGTTGATATATCGCAGAATGATGATGAGTTTGTTAATTATGATTTAAACAGTTATGACTTAATTACAGTCAGCCCTGGGATTCCTCTTAATAAATCTCCATATAGAGCCCTAACTAAATTTAAAGATAAAATAGTCAGTGATATTGATATATTCTATCAGTATATCAAGGATACTAAAGCTAAAACAATTGCTGTTACAGGATCAAACGGTAAAAGTACAGTAGTAACAATGACTGATTTTGTCCTCAAGGATCTTGGTTATAAGAGTATTCTTGTTGGTAATATTGGT…
FTT0452	FLH204677.01X	FtCD00022886	DQ681669	ftsW	cell division protein FtsW	ATGTTATATAGATTAAAACTATTGTTGAGTGGCAAAAACTCAAAAAAAGAACGTGTAAGAGCCAAATTAGAGATTGATATTTCAATTGTCTTTATAATGCTTGGCCTACTTACTTTTGGTTGGGTTATGGTGACTTCTGCATCTATGATTGTTGCTTTAGATGACTACAATAATCCTTATTTTTATTCTATCAGACAGGGTTTTTTTGCAATTATTGCAATTTTTTTATTTTTATTGGCTTTATTAGTACCAACTAAGAATTATGAAAAGAATTATAATGCTTTTTTCTTTGTGATGTTGATCGTCTTAGTTGCTGTACTTGTGCCAGGAATTGGGAAAAGTGTCAATGGTGCGCGACGCTGGATACCTTTGCTAATTATTAATATCCAAGTTGCAGAA…
FTT0453c	FLH151453.01X	FtCD00020453	DQ681670		hypothetical protein	ATGGTTAAAAAAATAATAATTTGTGCAGATGACTTTGGCATGAGTGATAATATAAATAGTGCTATTATTAACCTCTTGGAAAAAAAGGTTATTAATGCCACTAGCTGTATGCCAAATATGCCTGCATTCAAATTAGGAATTGCTCAATTAAAAAAAATATATAATGATTTTAGTCATGTTGGTATACATTTAAATTTAACTGAAGGTAATGCTTTTACAAATCCAAAATCTATAACTAGAAATGGCAAATTTTTGTCACTATCAAAACTTCTTGTCAAATCAAAACTTAGAGCAATAAATTATGATGATGTTTATAATGAGCTGAAAGCTCAAATAAATAACTTTATCGAAGACTGGGGCGCGCTGCCAGATTTTATTGATGGTCATCAACATGTTCAT…
FTT0454	FLH204647.01X	FtCD00022871	DQ681671	yfdH	glycosyl transferase, group 2 family protein	ATGATGACAAGTAGAAATGTTGATAACCCGCGTATTTATGCGGTGATACCAGTTTATAATGAAGAAGTATTGATAGAATCCTTTTTAAGGGAGCTAGCAGCTAAACTTAGTCAAATCAGTATAAACTATAAAATAGTAGTTGTGGATGATGGAAGTTTGGATAATTCTAAAAAAATTATTCAGTCATTAGTTGATCAGTTAAATATTAAATTTATTTCTTTTTCAAGAAATTTTGGTCAAGAGGCAGCTATCACTGCAGGTTTAGAAGCATCTAGAGATGCTGATGCTGCGATAATAATGGATTGTGACTTTCAACATCCTATTGAGGTGATAGATCAGTTTTATAGCAAATGGTGCGAAGGCTACTCTAATGTCTATGGTGTAAGGACAAGAGATGAT…
FTT0455c	FLH204716.01X	FtCD00022916	DQ681672		Dolichyl-phosphate-mannose-protein mannosyltransferase family protein	ATGAATAAATCTAAAAACTCTTACTATTTTGATATATTTATTTTACTAATCATATATATAGTATATTTCTTTGTTTTCCTTGGCTGGCGCCATCTTAGTATACCTGATGAAGGTCGCTATCCAGAAATAGCGCGCGAAATGCTAAGCTCAGGTAACTGGGTTACTCCAACTATAAATGGTGTACCATTTTTAGACAAGCCACCTCTCTATTACTGGCTAGAAGCTACCTCAATGCATTTTTTTGACATTACCCCATGGGCGATTAGATTACCTCAAGCATTGTTTGGTATATTAGGATGTATTTCAATATATGTTTTTGGTAGATACTTCTACTCACGTTTTGCTGGAGTTTTAGCAAGCTTTATTCTAGCGGCAAATGTCCTTTATTTTTTTGAAGCT…
FTT0456c	FLH204650.01X	FtCD00022874	DQ681673		UPF0269 family protein	ATGTATTTAAGACTAAAGGAGTACAAATATATGACAAAAGTTTTTTGCAAAAAATATCACCAAGAGTTAGATGCAATTCCATTTCAACCATTACCTGGTGAGCTTGGTAAAAAGATTCATAATGAAATATCAAATAAAGCTTGGCAAGCATGGTTAGCACATCAAACTATCCTGATCAATGAATATCGCTTAAATCTAATCGAGCCTAAAGCAAAAGAATTTCTCAAAGAAGAAATGCATAAGTTTCTATTTGAGGGTAAAGAAGAAAAACCAGAACAATTTAGCGAAATATAG
FTT0457c	FLH153493.01X	FtCD00020650	DQ681674	yccK	anaerobic sulfite reductase subunit	ATGGTTAACTACAACACAGACGAGCACGGCTTTTTACTTGACTTTGCAAGTTGGGATATGGATTTCTGTAATTTAGCGGCTGCACAAGAAAATATCTCCCTTACACAAGAACATATATTTATTATAGAATTCTTGCGTCATTTCTATCAGCAAACTAGCAAATCACCAGCAATTAGAGAGCTTGTAAAAGCTTTAAAAGAAAAATATGGCGAAAAAATAGGTAATAGCTTATATTTACAAACTCTATTTCCAGTATCACCGGCAGTACAAGCAGCCAAATTAGCTGGTTTACCAAAGCCTAAACGATGTATTTAG
FTT0458	FLH204686.01X	FtCD00022893	DQ681675	sspA	stringent starvation protein A, regulator of transcription	ATGATGAAAGTTACATTATATACAACGAAGTATTGTCCATATTCTCTTAGAGCAAGAATTGCTTTAGCAGAAAAGAAAATGTCAACAGATATCGTAGAGGCTGGCGACTTAGAACCAGCCATGATCAAGAAAATAACTCCTAATGGTGTTTTCCCTGTTTTGATGGAGAAAGACTATAGCATCAATAATAGAAAAGCATTGCTAATTTATATTGATGAAAGATTTCCTGCTCCAAGCTTGCTACCAAATGTAGTTAATGAGCGCATAAAGATACGCTTATCGCTTGATAAAATTGATAATGAGTGGTATCCAGTATTAGATCAAATTCGCAAACACAGATCAGATCAGAAGATGCTTGAATCAATGTTTAAAGACCTAAAAGAAAGTTTATTGGCAATG…
FTT0459	FLH153398.01X	FtCD00020640	AY774696	sohB	peptidase family S49 protein	TTGTGTTATCAAAGTTTTATAGGTTTTGTATTTTTTGCTCTGAGTACTGTATTAGTTGTTGCTGCTATTGTGATTGTGATTGGGAGCTTTTTCTCATTATTAAGTAAGGCAAAACAAGAAGCTGCAAATCTGGCAAAAGGTAGGCTTGAAATAAATGAAGTAGCAACTGAATATAAACACACTAAGCAACAGCTTTTAGAAAGTCTACTTGAGAAAAAAGAGTATAAAAAGTTTTTAAAGGAGCAAAAAAAGCTAGATAAGCAAGATGATAAGCCAAAACAAAAAATTTTTGTTATCAATTTCAAGGGTGATATCGATGCCTCTCAGGTTGAAAATCTGCGTAATGAAGTTTCAGCAATTTTAGCAGTAGCTAATACAGAAGATGAAATTATTGTTAGG…
FTT0460	FLH153350.01X	FtCD00020635	AY774672	holB	DNA polymerase III, delta prime subunit	ATGTTATCTCTAACCACACATCAGCAATTAATAGATAATTTTCTTGAGCAAAAAGCTAAGCAAACGTTGCGTCATGCTTTTATCTTCAGAGTAGAGGACGCTGTATTACTTGATAGCTTCATCAATTCTTTGTGCCAACTATTGTTAGGGGAGAAAATACTTAGTTATGATGACTCGCCTTATATCAATATAGCAGCGATTGAAAATGATGAAATTAAAGTCGCAGAAATAAAAAAAATAATCAAAAATTGTGAACTGACCGCACATAATAATTTAGCAAAGATTATTATAATCCAGGGACTCGATTTATTGAACGAATCAGCGGCTAATGCGTTGCTAAAAACATTAGAAGAACCAACACAAAATACTTTTTTTTTGATGTTTACAAGAAATTATAGT…
FTT0461	FLH153402.01X	FtCD00020641	AY774697	yhbY	RNA-binding protein	ATGGATGTAAAACAACAACAAAAATTAAAAGCTCAAGCACATAGCTTAAAACCTGTTGTACTAATGGGTGAGAAAGGCCTAACAGAAAATGTAATCTTAGAGATTGATTTGGCTTTGGCATCACATCAATTAATAAAAGTAAAAGTCGGTCGTTTGCCTAAAGAAGAGAAGCAACAAATTGCTAGTGAAATTACTCAGGCGACAAGGTCAGAGCTTGTACAGATTATTGGTAATATTCTAGTCTTATACAGAAGAAATCCAAACAAAGAAAAAATATAG
FTT0462	FLH204651.01X	FtCD00022875	DQ681676	hemB	Delta-aminolevulinic acid dehydratase	ATGAGCTTTCCAATATCACGTCCACGTAGACTTAGGGTTACACAAGCTTTTCGCGATATCGTTGCTGAGACAACTTTAAGCCTTGATGACTTAATGTATCCAATATTTGTTGTGCATGGTCAAGGAGTTAAAAAAGAAATTTCAAGTATGCCAAATCAATATCATTGGTCAGTTGACATGCTTGATGAGTTAGTAGATCAAGTTGTCAAGGCTGGAATAAGGAGTCTAATGATATTTGGCGTGCCAAAAATCAAAGATCTTGTTTCATCGGAGAATTATGATCCTAATGGAATAACACAGCAAGCAATTAGAAAGATTAAACAACTTGCTCCTGAGCTTGTGATAGCTACAGATGTATGTATGTGTAGTTTTACACCACATGGTCATTGTGGAATTTTA…
FTT0463	FLH151592.01X	FtCD00020481	AY774898	yibK	tRNA/rRNA methyltransferase	ATGATAAGTATTGCTTTATACGAGCCAGAAATCCCACCTAATACTGGCAATATAATTAGGTTATGTGCAAATGTAGGAGCAAAGTTACATTTAATAGAGCCATTCGGATTTAAGTTGGAAGATAAGCAACTAAGAAGAGCAGGTCTGGATTATCATGAATTTGCGGATCTTAAAATTTATAAAAACTTTGCTGAGTTTTATCAACAAAATAAAGATAAGCAAATTTGGGCATGCACAACCAAAGCAAAACAGTATTATCATAAGGTAGATTTTAGTTGCGATGATATTTTACTTTTTGGTCCTGAAACTCGAGGGTTACCTGCAGATGTATTAGAGTTACTAAAGCAAACACAACTGAAAATACCTATGCATAAAAATAGTCGTAGCTTAAATTTATCA…
FTT0465	FLH231454.01X	FtCD00039360	DQ681677		hypothetical protein	ATGGTACTTGTATTGACAAGCACAGGTGCTCTGATGAATGGAACATCAAAAGGTACAACATATAATGGTCGGATCGTTATAGATTGTGCAATTACTGGCATGCCTGGACCTTACATTGGTACTGTCTCGATGAGTATAAGTAGCGGTGGTAACAACTATAGTGGTAGTATTCCGCTTACAATCAGTTAG
FTT0466c	FLH153569.01X	FtCD00020659	DQ681678	argS	Arginyl-tRNA synthetase	ATGAATATAGAAAATTATTTATCAGAAACTCTTGCAAAGGTGTTCCAAAAGCTAGGTTATGCAGAAAGTTTTGCTAAAGTTGTAACCTCAACTCGTGAAGATGTTAGACATTTCCAGTGTAATGGCGCTATGCCATTAGCTAAATTCGCCAAAAAACCGCCTTTGGCAATTGCCGAAGAGATAGTCGAGCATATTGATGCTGAAGATATCTTTGCCAAATTAGAGGTTGCTAAACCAGGCTTTATCAATATAACTTTAGCACCAAAATTCTTAGCTGATACTACAAATAGATTTTTAAATTCTAATAAATTTGGTGTACAAAACAACTTACCTAATAGGAAAGTTGTGCTTGATTTTGGTGGTCCAAATGTTGCTAAGCCGATGCACGTTGGACACATT…
FTT0467	FLH229995.01X	FtCD00039266	DQ681679	ostA1	organic solvent tolerance protein	ATGTTAAAGGGGATTCATAAGTATCTATTGATGTGTTTTGGTACTGTATTGTTTACAGTGCAAGCCAATGCTGCACGGATAATGAGCAATAATCCTATTAAAGAAGATTGGCAATGTAAGGTAGTTGATGGTGAGTGGAGTTGTAAACGAGCAAAGAAACCAAAAAGTGTCTTTGATAAAAAGCTTACTAAAACTGAAAAAGAAAAAGCTCTTGCTGATGATCTGGCATGGGTCAAGAAACCATCATATTTTGTTGGTGGATACTATAGCAATGATAATCAGTTTACCAAAGCTTTGTGTGAGTCTAAAAAGACAGATCTTAGTTATGAGAAGTCTGAGTTTGACAATTATGGTACATTAATAGCGTCAGGAAATGTCCAGGTGCTACAATGTGATCAG…
FTT0468	FLH204697.01X	FtCD00022901	DQ681680	surA	Peptidyl-prolyl cis-trans isomerase (PPIase)	ATGGGGAAACGGTATATAATGAAGAAGCTAATAACAATCTTTTTGTTGATGCTAATGTTAAATAATGCTTATTCAGATATCTCTTCATCTATGTTTCAAAATGCTTTTAACTCGGGTATTGATGCAACATCTCCGGTATCAATGAATGTATCAGATAAAAAATATCTTGTGAATAAGACGGTAGCGATAGTAAATAGTAGACCAATTACATCTTTTGAGCTGGATCAAGAGCTGGCTAAGCTAGAAGCTATGCAGCCAAATTCAGCCTTTAATACAGATCCTCTAAAAAGACAAGCATTACAAGATTTGATATCTCAGAGTGTTTTATTACAGCTTGCAGAGCGCAATAATATTATGATATCTAATCAACAACTAGATAGTGCTATACAAGATATTGCA…
FTT0469	FLH153663.01X	FtCD00020670	AY774695	ksgA	dimethyladenosine transferase , kasugamycin resistance	ATGCAATATATGACAAAAGCAAAGAAATCGCTAGGGCAGAATTTTCTTCAAGATGAGAATATAATTCGTAAGATTGTTCAGCTAGCTAATATAAAAAAGCACGATATAGTTGTCGAGATCGGACCAGGATTAGGTGCTCTGACAAGATATTTGCTTTCTAGTAGTAATAATGTCAGTGTTGTTGAGTTTGATGCGAGCGTTATCGATACGCTAATAGCAAATTGCCAAAAATATGGAACTCCACATATATATAATCAAGACTTTTTAAAATTTGATATTTCTTCTCTAGAGAATTCATCAAATCAAAAAATAAAATTAATAGGTAATCTCCCTTATAACATATCTTCACCAATTCTTTTTAAGGTAATCAAAGACAGTGATAAAATTGTTGATGCACAT…
FTT0470	FLH153334.01X	FtCD00020634	AY774662	apaH	Bis(5'-nucleosyl)-tetraphosphatase	ATGGCTACATATGTTATCGGCGACGTACAGGGCTGTTACGATGAACTGCAATTATTACTACAAAAGATAAATTTTGATATACAAAAAGATAAGCTTATTTTTGCTGGTGATATTATTAATAAAGGTCCAAAATCTCTTGAAACTGTAAACTTTATTATGTCTTTAGGTGATTCAGCGCAAGTTATCTTAGGGAATCATGAAATATTATTTTTAGCGGTTAGCTATAATTATTTACCTTCAAATAATAAAAATACCTTTAATGATGTCATTAAAGCGGAAAACCTAAAAGAGATTCAAGACTGGTTGTGTAATCAAAATCTTTTAATAAGGATTGGCGATGTCTTTATAACTCATGCAGGAATTCCACATATTTGGTCACCTAAGAAAGCAATGAAAAGG…
FTT0471	FLH153477.01X	FtCD00020648	AY774698	aroD	3-dehydroquinate dehydratase, type II	ATGGATGTTTTAGTTGTTAACGGACCAAATCTTAACTTATTGGGTACTCGACAACCACAGTTTTATGGTCATAAAACTTTAGCTGATATTAACAATGATTTATTAAAAATTGCCAAGGAAAATAATATAAACATCGATTTCTATCAAAGCAATCATGAGGGACAAATAATTGATAAAATACAGCAGACAGCCGCAAAAATTATCATTATAAATCCCGCAGCTTTCACGCATACAAGTGTGGCGATAAGAGATGCTTTTTTAGCTATAAATAAGCCTTTTATTGAAATACATTTGTCTAATATATATAATAGGGAAGAATTTAGGACTAAATCGTTTCTATCAGATATAGCTTATGGATGTATATTTGGGTTTGGGCCAAATGGTTACACGCTAGCATTA…
FTT0472	FLH151600.01X	FtCD00020482	AY774905	accB	Acetyl-CoA carboxylase, biotin carboxyl carrier protein subunit	ATGGATTTATTAAAAGCAATTGATAGAGTGGCTGAGATTCTTAACTCAAGTGATATAAAGGAAATCAGAATTAAAGATGGTGGTTCAAGCATTTTTATGACAAAAAATAATACAGCTGCTATTACAAGTGTAGTTTTTGCTGCACCAGTTGCTAGCAATGTTGCTTCAGCAGCTCCAGCAGTAGCTACTGCTGCTACTTCGGCAGCAGCTCCTAAAGTAAATCTGGCTGAAGAAATAAGCGGTGAAGAGATCAAGTCTCCAATGGTAGGTACTTTCTATGGCGCATCTTCACCTGATGCTGCTCCTTATGTTAAAGAAGGTCAAGAAGTCAAAAAAGGCGACGTATTGTGTATCATCGAAGCAATGAAAATCATGAACAAAATTGAAGCAGAAAGAGCA…
FTT0473	FLH153474.01X	FtCD00020647	DQ681681	accC	Acetyl-CoA carboxylase, biotin carboxylase subunit	ATGATTAAAAATGTACTGATTGCCAATAGAGGTGAAATAGCTCTTAGAATTTTAAGAGCTTGTAGAGAGTTGGGAATTAAGACAGTCGCTGTGTATTCTACAGCTGATGCTAACCTTATGCATGTCAAACTAGCTGATGAAGCAGTTTGTATAGGTCCTCCTGCTCCTAATCTTAGTTATCTAAATATCCAAGCTATTATAACTGCCGCTGAAATTACTAATGCTGATGCGATACATCCAGGTTATGGTTTCTTATCAGAAAATGCAAAATTTGCTAAAGCTGTTGAAGAAAGTGGCTTTATATTTATTGGTCCACGTGCAGAAAGCATAGAGATAATGGGCGATAAAGTTGAAGCTATTAGATATATGAAAAAAGCTGGTGTTCCATGTGTGCCAGGT…
FTT0474	FLH204696.01X	FtCD00022900	DQ681682		hypothetical membrane protein	ATGCATAATTTTCAATCTTTTCTTAAAAGTGTTAGAGATTCTCGGGAGCTTAAACGAGAAACTATCGCTGATGCTATTAATCTATCAGTAGAGACTATACAACTTATAGAAGAAGCCGATAATAATAGTTTATTATTAAACTCTAGTAGTGTACTTAAGAATCAAATTAGAAGATATTGTGAGTATTTAGAAATTCCCGAGAAAAAAATAGTATCGATACTTAATAAAATTGATATCCTTTATTATAAGAAATCACGCTATGGTAAGCTGAAGTTTTTTGACTATATTAATAGATTAGCGATATTAGTAATAGCTATAACAATAATTGTTTTAGTAACTAAACATATTAGAGAAAATGTAGATACTGTAACTCCAGAAAATTCAAAGTCTACTATTATA…
FTT0475	FLH231468.01X	FtCD00039366	DQ681683	msc	mechanosensitive ion channel protein	ATGAATCTTTTAAACAATATACTCTTAAGAGTCGAGAACTATTCGACTACATATATACTTTTGATTGACTTTGTTATATGTTTGGTTCTTAGTGTTATTATATCTTTACTAGGAAGCCTTTTAGTAATTAAGCATAAAGATACAATTAGATATTCATTCGTAAAATCATTTAAACTTACTCTTTATTTGGTTATTTGGTCGTATTTTATAAAAACTTGTGTTGACTTACCTGTTATAGTTCATCTGCCTGATTATAAAGAAGTTATAGTATCATATTCGGATAAAATTTTTGATTTTTGTATTTATTTAGCAATTATTATTAGTTTATTTAGGTTTCTATATAAAAGTAAAAATATTGCTATCGAAAAGAAAAAAGCTGAAACAAAAGATGGTTATGAT…
FTT0476c	FLH153374.01X	FtCD00020637	AY774683	poxA	Lysyl-tRNA synthetase	ATGAGTTTAGAAAATATTAAAAAACGTGCTGAATATCTTGCAAAGATTCGTAACTTTTTCAAAGATTTAGATGTCTTAGAAGTAGATACGCCGTTAGCATATGATTATGCAGTTACCGATCCATTTATAGATGTATTTAGCATAAATACAGTGGCTGGAAAAAAATATATACAAAGTTCTCCTGAATATGCAATGAAAAGATTACTTGCTGCTGGTAGTGGTAGTATTTATCAAATTTGTAAAGCTTTTCGCGATGAGCCTTGTGGTAAGTTACACAATCATGAGTTTACAATGATAGAATGGTATCGAGTTGGCATAGACTACTATCAACTAATGCAGGAAATGCAAAAGTTATTTACTATGCTCAAAGCAAATTTAGAATTTATCTATTTAAGCTAT…
FTT0477c	FLH204715.01X	FtCD00022915	DQ681684	birA	Bifunctional protein, biotin-[acetylCoA carboxylase] holoenzyme synthetase; transcriptional repressor of biotin synthesis (BirA family)	ATGAAAAATCACCGCCTCATAATAACACAACTTAACAAATATATAGATGATATAAAAGTTGAATATTTTCCAACTATAGACTCAACAAATGACTATTTCTTAGCAACAAATTTCACACATAAATATCATTTTTGTTATGTGGATAAGCAAACAAAAGGTCGTGGTCGTCGTGGCGATAAATGGATTTCTGAAGATAAAGATAATATCTACTCAACATTAGCGTTTCATTGTGATTTTGCAATCACAGCTGACTCACTTAAAAGTGTCAAAATAGCTCTAGGAGTCTTAGCAGCTATCAAAAAATATATTCCCAAAAATCTACAACAATACCTAAAGATAAAATTACCAAATGATATTTATTTTCAAGATCAAAAACTCGCTGGGATACTAATAGAAACA…
FTT0478c	FLH204714.01X	FtCD00022914	DQ681685	recJ	Single-stranded-DNA-specific exonuclease	ATGCTAATCAAACAAAAAAAAATTGATAACAATATCTTTAGTACTCTACTAGCTAAAGGCTATGATTCTTTTACAGCAAAAATAATCTCTGCTAGAGTACGTAAAATAGAAAACCTTGAGCTGATTTTAAATGGTTCAATCAAGGATCTGTCATCACCATTTTTATTCAAAGATATTGAAAAAGCTGTAGAAAGACTTTATAAAGCATTACAAAATAATGAAATTATTGGATTAGAAACTGATCATGACTGTGACGGTCAGACTTCACACGCGATTTTGTATGAAGCTTTAACTAAAATATTTGGTCACCCTAAAGAAAAAATCCGCTCATATATTGGCCATAGACTGCAAGAAGGCTATGGTTTATCAGAGTCCCTAATGAATAGAATTCTTACAGAT…
FTT0479c	FLH153410.01X	FtCD00020642	AY774663	perM	PerM family protein	ATGATTTTAAAAACTATAAAAGATTGGTACCAAAACAGATATCAAAATAATGAACCAATAGTATTTGTTGGTTTAATGTTGTTTTTCTATCTAGTTTTAACTTTTTTAGGTGATTATATAGCTCCAATATTAGCTGCACTAGTCATTGCGTATTTACTAGATACTCTTGTAAATATTTTACAAAAATTCACCAAGCTTAAGCGTATAGTTTTAGTATATATTGTTTATATTTTATTTTTGATAGCACTTCTATCACTAATATTTGTACTATTACCTATTATCATTAATCAGCTTATTGATTTTGTAAAACAAGCTTCACATATATTATCAAGCTTAAAAACTAGTTTAGAGGAACTATCAATAAAGTATCCTACGATCCTTACAGAAGATCGAATTAAT…
FTT0480c	FLH204693.01X	FtCD00022897	DQ681686	xasA	Glutamate:gamma-aminobutyric acid antiporter family protein (APC family protein)	ATGGAACAAATTATTAGTAGTAAAAAATTTGGTCTTATCAGACTAATAATGATAAATATTATCGCTGTCGATAGCTTAAGAAATATCTCTATAACGGCTCAAGCAGGTTGGATCGTTATAACTTTCTATATTTTAGCTGGAATTTTCTTCTTGATTCCGTGTGCGCTACTAACCGCAGAAATGTCTACCGGCTCCTCACAAGAGAATGGTGGTATCTATATCTGGGTTAAAAAAGCATTTGGCAAAAGACTAGGATTTTTGGTTATCTGGTTACAGTGGGTTTACAACTTAGTTTGGTTTCCATCTATTTGTGGATTCTTCGCTGGAGTTATTGCTTATGTCATAGCACCTTTGACCGGACAAGATGCTAATCACTTAGTTGCTAATCCTTGGTATATG…
FTT0481	FLH151588.01X	FtCD00020480	AY774897	potF	Putrescine-binding periplasmic protein	ATGAAACGAAAGGTTTTTATTATTGGCCTGCTAGTTAGTTTGTTTAATCTGGCATATTCAAAAGATGAGTCATATATTTGTGATAATAAAATTCTTAAAAGTCCTATCACTGCTACACAAACTAGAACTCAATTAAATTTTACTAACTGGGCAGACTATATATCTCCAGATATAGTACCATGTTTTTTAGACTTATCTAATACTAGAGTCAAGTATATCTATACTTCTGATGATAATATGACTCGTGCGAAAATTATGACAGGATCATCTGGTTTTGATTTAATTGAGCAAGGTGCATTATATTTAAATAGTGAAATCGCATCTAATGCTCTTGTTAAATTAGATAAATCAAAATTACCAAATCTAAAATATCGTAATAAAGTAATTTATGATAAAGTT…
FTT0482c	FLH153326.01X	FtCD00020633	AY774659		hypothetical lipoprotein	ATGACTGCAAAAAAGAAACTATTAATAGGAACTGCAATTCTGTCTAGTGCAGCTATCTTAGGAAGTTGTGGCAAAAGTGAAACTGCTACAGAGCTACGTATAGTAGATCAATGCAATACTGCCAATGATCTATGTAAGTTTGAGCTAACTGATGCTTTAGTATCTCGTTATACTAATTTATTAGGTAAGACGATAGAGAGAATCGAAAGCCAAACTCCACTACAAGCTATCCAAGGAACAATTACATGGAATACACCAGCTGGTGCTACACTAGCGACTAATACAGATGTAGTGACTCAGCTTGGTTCAGGTTGTCAGAATGATAGCTGTACTGCAAATGCCAACCCCACAGCATTTAATTTACAAGTTGGTAGTAACTCTATAAGTGTATCAGGTACT…
FTT0483c	FLH150806.01X	FtCD00020397	AY774852		hypothetical protein	ATGCAAGCAAAAGTCATAACAAATTTTGGTGGTAATATTTTTGTAAAGCTCACCACTGGTGAAAAAGTTTCTGCATTACAGCGTAGTCATCTAAAAGGTGAACTTACAGTTGGCGATAATGTTGAGCTAGAATACACAAATGCTACTTATGTAATTACTAAACTACTTGATAGAAAAAATCTCATATCACGTCCCAATCAGTACCAGCGTAAAAATAAAAATATTGCTGCTAATATTGATAGCGCTGTAATTATTATCACGCATTCACCTGCTCCCGTTGAACATTACATTGATAGATATTTAGCTGCTCTTCACAATAGTGATATCGAACCTATAATAGTCATAAATAAGATTGATGATCAGTCTAAAAATGATAGACAGCATCTACAATGTATTATA…
FTT0484	FLH204700.01X	FtCD00022904	DQ681687		hypothetical protein	ATGAAAAAATCAAAAATCTTAGTTTCGATAGCAATTGCAGTTTTTGGAGCTGCAGGAACATCTTTTGCAGCAGAAGCTGATAAGTCTAGTTCAATAGATAAACTATTACCAGAAGGTTACTGGGTTCAGTTTGATGAGGATAACGATGCTGGTCGTGGTATGCCTAATGGAATTATTCATACATATTTTGCTAAGAATGATAAGTATGGTAAAAAAGGTACATTACAGATGGAAATCGTAGTGCCACTAATGTATGTTGACTCTTCTGGTAAGCCTACAAAGCCAAGAGCTACTTGCTATAATTGTTCTAATGGCTCTTATAATGGCTTTAATTACAGGGGTGAAAATGCTCCTCTAGAAGGTTTTGTATTTGCTGGCAATATGCAGCCTGAAGCTGGG…
FTT0485	FLH150678.01X	FtCD00020384	AY774846		hypothetical protein	ATGTTGCGTAATTTAATTGTTATAATTGTTGCTGTTTTTGTATTTTCTTTTGCTTATACAGAAGAAGATTGGCAAGGTCTTTATGCTACTGGCTACTGGTTGCAGCGAGATAGTGTTACAAAAACAAATATTGCCGTAATTCATGCATATGATAATCAGAATGGTAATTTAAATGCTGAAGTTTATGTGCCATTATCAAACGTTGATGATGGTATAATCCATGAACCAATTATTTACTGTGAAAAATGTGGAAAAGGCGATGCTTATGGTAATCTTTATGATTATTCAAGTGGCAAAGATAAATATCAAGGCTTAGAGTTTGTTTGGAATGCCAAAAAAACTGATAATGGTAATCTTGCTAAGGGTAAGGGCCCGCTATATACAGATGGAGCTGTTTTG…
FTT0486	FLH150996.01X	FtCD00020416	DQ681688	mutL	DNA mismatch repair protein	ATGCAACCACAACAACATGATTATCGTCAAATAAAAATTCTACCTGAGAGTTTAGCTAACCAGATAGCTGCTGGTGAGGTTATCGAAAGACCATCTTCAGTAGTCAAAGAACTTATTGAAAATGCAATTGATGCCGGAGCAACTCAGATAATAATCGAAATTCAAGAGGGCGGTAAATCATTAATCAGAATTAGAGATAATGGTAAAGGAATCGCACAACAAGACTTAAAATTAGCTTTGGCACCTCATGCAACAAGTAAGGTCTATACCTTGGATGAACTTGAAGCTGTGGCTAGTATGGGTTTTCGTGGCGAGGCTTTGGCAAGTATAGCTTCTGTTGCTAAACTAAAAATTATCTCAAAGCATCAGAATTCACAAGATGCTTGGCAAATTAATAAC…
FTT0487	FLH231482.01X	FtCD00039373	DQ681689		hypothetical membrane protein	ATGGTGGATATTTGCGGTTTTATTATCCCCACTTACAGATTGGTGATGTTGATAGGGAGTTTATTAGCGACACTATGCAGCTTTAAGATTATTCCAAAAAGAAATGTCAAAAATACAAAGATAAGTTTTTTAAGAAACTGGCAAGAAGTAATTAGTTTTCTTAACCAAAATAAAACTCTATATTGGTGTTATTTAGCTCAAATTGGTATGACATGTTTGTATATGATTGCTCCAGTATTTATTTCTCCATATGCAAAGAATATTCTTAAAGCTTCTTCACTAGAGTTTGGCTTGATTGAGGTGGCTTTTTCGGTAGGCTTTATAGTTGGAAATGTTTTATTACCATACATGATAGAGAAAATCTCACCAAAACAGACATTGGTTTTCTCGATGACTATA…
FTT0488c	FLH231470.01X	FtCD00039367	DQ681690		major facilitator superfamily (MFS) transport protein	ATGCCTTGTTTTTTTACTATGGTGTCGGCTTTTTTACAAATACCTTATGGATATCTTATAGATTCAAAAGGATTTGAAAAGATATTACCTTTTTGTATATTTGCTGTTTTAATAGGATCTCTCGTATATTGGCTTTGTGATAATCATATTTTTATAGGTATTAGTCGTCTAATTATTGGCGCTGGATGTGCAAGCTCATATATACTGGTAATATTCATAGCTACAACATATTTTAAAAAAACTATAATTCCACTATTAATAAGCCTAGGAGAAATATCTGTAGGGCTTGGTGACTATTTTGCAGGAAATGTTTATTTATATACATTTAAATACTTAGGTTGGCATATGTCTAATATAATTACAATAATTATGATTTCTTTGCTATTTTTTTACTCTATG…
FTT0489c	FLH150854.01X	FtCD00020404	AY774826	trxB	thioredoxin reductase	ATGGCAAATCATCATAAACTAATAATTTTAGGATCTGGGCCTGCTGGCTATACTGCAGCAATATATGCAGCACGTGCAAACTTAAAGCCAGTAATTATCACTGGTATGCAACCAGGAGGTCAACTTACGACTACTACCGATGTATATAACTGGCCTGGTGAGCCTGATGGTATCATGGGTCCTGAGCTTATGGAAAAACTACAAAAACAAGCAGAAAGATTCGATACACAAATAGTCTATGACACTATCAATGCTGTAGATTTACAAAATAAACCTTTTAAACTAGTTGGTGAAGTTGAGCAATATACATGTGATACTCTAATTATAGCAACTGGTGCTACTGCTAAATATCTAGGTTTAGAGTCAGAAGAGAAGTTTATGGGTAAAGGTGTCTCTGCT…
FTT0490c	FLH150941.01X	FtCD00020410	DQ681691		Phospholipase D family protein.	ATGAGAATTTTATTTACAATTTTAGCTTTTTTTGGATACAGTTATGGGTTAGCACATGGAATTACTAAAACAATAGTACACAACTATCCTGAAAACATATCAAAATCATTTCAAATTAGTAACAACAATTATGCTCCTTTACAAATTAGTAAACTAATCCAGAGTGCAAAGAAAAATATTGATATTGAAGTATTCTACATAGATATAAAAAAAGACAGTGTTCTAGATAAGATGATAATTCAACCTTTAGCAGCAAAGGCTAATCAAGGAATTAAAGTTAGAATTTTGGTGGATGACAAATTTTATAGCCAATACAGCAACAACAAAGCTAGCTGTGATTATTTAAACTCTATTAAGAATATAACTTGTAAACCGACAAAAGAATTTCAAGAAGCTGTA…
FTT0491c	FLH204694.01X	FtCD00022898	DQ681692	gph	phosphoglycolate phosphatase	ATGATTTCTTATACGATGATAAAAAATATATTTTTTGACTTAGATGGTACGCTTGTAAATACTGTAGGTGATCTAACAGTGGCTACAAATACTATGCGTAAACATTTTGGACTTAATCCTGTATCTGAAGATGTTTTGGCTAATATTATTGGCAAAGGCTACCCCACTACTGTTAGAAAAGTCCTGGCACTAGATTTTGATGATAAAGATTATATCGAGTCTATAGCTGATGAAGGTGTTAAAATAGTCAGTCAAACATACAAAACTCTAAATAGTGCTAATAGCAAGGTATATCCTAATATTTTTAAAACATTAGATTTTTTGAAACAACAAAATATCAAAATGGCTGTTGTCACAAACAAACATGAAGAAGATGCTATACAATCCCTAACTCACTTA…
FTT0492c	FLH204645.01X	FtCD00022870	DQ681693	lysR	transcriptional regulator, LysR family	ATGAAAATGTTATATGAGCTAAAACTATTTGTAGCTGTAATTAACTACGGTAACTTATCTGCTGCTGGACGAGAATTTTATTTATCTCCAGCTAGTATTAGTAATAAAATTAATGCCCTCGAAGAGTATTATCAAACCAAGCTTTTAATAAGAACTACAAGAAAGATTGAACCTACTAAAGCAGGAGAAAAGCTTTATACTACTGCTATTAAATTATTAGAACAACTAGAGAACCTTCAAGAAGATATTCAAAATAATGAAAACTCCGCAGAAGGTGTTATTAAGATAACGATTCCTTTTGACTTAGGTAAGCAGATAATCCTACCAATTTTAGATGAATTCAAAGAAAAAAATCCCAACATACAATACGATATAAATCTCTCTGATGATGTAATGTCT…
FTT0494c	FLH204702.01X	FtCD00022906	DQ681694	cutC	CutC family protein	ATGACAAACTTAGAAATATGTGTAGATAACTACCAATCAATCATTAATGCTCAAAAAGCTGGCGACGATAGATTAGAATTATGCTCTGCTCTTGGAGTCGAAGGCCTTACACCCTCTCCTAGCCTAGTAAAATTTGCCAAAGAGAATTTCACAGGTTCATTACAGGCTATGGTTCGCCATCGTGCTGGCGATTTTTATTATGATGAGATAGATCAGCAAATTATGCTCGATGATCTAAAAGCAATGCTTGAGCTGGATGTAAATGGTATTGTGATTGGTGCTTTAACCAGAGAAAATAAAATTGATAAAAATTTTCTAGAACCTTTTATTAAGCTTACAAAAAAAGCTGGTAAGGAACTAACGTTTCACAGAGCAATTGATTTAACAACAGATATATAC…
FTT0495	FLH151368.01X	FtCD00020442	AY774882		hypothetical protein	GTGAGTCAATTATTTATAGTTTATCTTGGTGGTAGTGCACCAAAAGCAAATATTGAATTACATGATGTGCAATTTGTAATAGCAGATAATATCGAAGGTACTTATGAACAACTGAGACAAAACTGGTTTGGTACCGTTAAGGACTTACACCTAGATAGTTACAAGGCTGTTAAAGGAGCAGATGGGTATCAAATATCTATACAAGATAAGCCTCAAAATTCTGATAAAAAATTATACTTTGTAAATCTTGGCGGTTATGATGCTTCTAAACTAAATGAACTTCATGAATTCGCGCTATTTGTTGCTGCAGATAATACAGAGGCAAAAGAGAAAGCGAAGCAAAGCCTACTAAAAAACTCTTTACATCAGCATAAAGATAATCTTATGGAAGTTGATGAC…
FTT0496	FLH231485.01X	FtCD00039374	DQ681695		hypothetical protein	ATGATTCTTTATCAATATAGAGGTAATATTCATGATAATAGTAAGCAAGATAAGAAGTTTTTTATTGATTTGATCACAAATGGATCTATAAAGTTTACTAATCCCATTGATTTTAATGATCCGTTTGATTGTTATCCTAATTCATGGGGGAATGAAATTCATCAGGGCGAGCTGCCTCATGCTGTAGTAGATAGTTGTAACTACATGTTACAAAAAGCCTTATCTCAAATAGTTGGGGTTACATGCTTTACTCCTCATAATGATAGGATGCTAATGTGGAGTCACTATGCAAGTCAACACAAGGGTATTTGTATAGGGTTTGATACGGATATACTTATTAAAGAATGTGATAAGAACAGTCATGGTAGTCCTGTGATACATTCTCTTAAAAAAGTAATT…
FTT0499	FLH151083.01X	FtCD00020424	DQ681697		hypothetical protein	ATGTTTAAAACTTCAGTTAAAAGAGTTTTAATAGTTAATCCAGGACCATCTGCAGAATATACTATAACTGAGTTATTTAAAAATGATGTTGAGATATTTGTCATAATAACTCTAGATCCTATTGTTATTTTAAAGCTCATAGAAAAAGTTTTAACCAAAATAAAGAACGTTATATCAAGTGAAGATAATTTTGATATCAGTTATCTTGAGTCATTAAGTTTTGACTACATTATATGTGGGCAAGAAGACTCTATAGTAATATACGATAGACTTATGAATAAATTACTTACGCAATATGCAAATAGTCTTAATACTAGCTTAGTTAGAAAAGATAAATATCTTACCCATGAGGTTTTGAAAGCCAAAGGTTTGAATTATATAAAGCAAAAACAAATTAGT…
FTT0500	FLH204644.01X	FtCD00022869	DQ681698		hypothetical protein	ATGTTTGCAAAAACACTGTGTTTGTATAATTTTACTAACAATCCATTAATTGATCTTAACACTTTAAAATCTACGTTTTCATCTATAAAAGTAGTTAATCAGCTAAAGCCTATTGGTTATGTTAGGAATCATGACTCAAATTTATCAATAATTGATATTGTTGCCTTTATGGTATTACAAAATGATAATTTTGAAAAGCTAGAAAAAGATGCTCAACAAATACTTAAATGCGATATAGAAACAGGTTATACAATTGTATAG
FTT0501c	FLH231460.01X	FtCD00039363	DQ681699		conserved hypothetical membrane protein	ATGTTGTTATTTAAAATGACTTCTTATACCAATATCAAAAAATTAAGCATTATATGTTTAGTCGGCGCGCTAATTGGATGGGTTTTATATCCTTTTATCTATCCTATTTTATTTGCTGGATTACTTGCGATAATTCTTGCACCACTACAGTTATATTTAGAGCAGCATATTGGTAGACATAAAAGTAGTTTTATAATTGTGATTGCTATCTTATTATGTATTTTTATACCCTTACTTATTGTATTATCTTATGTGATTACAGAGATTATTTCATATTTACAGCATAGTGAATCTCTATCTCAAACTTTTTCACAATTAAGCAAATCAATAGCAAATATTCCTTATATCGGCAGTACTCTTCAAGAGCATTTTGATAACCTTCTCAACATGGTTAATCAA…
FTT0502c	FLH151304.01X	FtCD00020438	AY774871		hypothetical membrane protein	ATGTTTAATAAGACTTTTTCATTTTTTGTAGTATGTGTATTATTACTCAATATCAATCTAGCATACTCCTCCTCATCGGAGAATAAAATCACAGATATTAAAATGCATAGTGATAGTGTTCCAAAAGTTTGCAATCAAATATCCACTACTCTTATTACGCCTATTACTGCGGTAGGTATAGCTGTAGGTACAGTCCTAATGATTCCCGTAGGTCTGATCGGTGGAATGGCTGGCGGAACTATAATGTCACCAATGATGTTTGATAGTGGTGGCTTAAGCAAAAATCCTATAATTCAACCAATACAAATAACTGGTGCGGCTCTTTTAGGTATTATTTTAGGCGCTGGTGTTGGCAGTATTGAGTTACCAGTCCAAACAGCCTCTAGTTTAACTAAATCA…
FTT0503c	FLH151196.01X	FtCD00020431	DQ681700	sucD	Succinyl-CoA synthetase, alpha subunit	ATGAGCGTGTTGGTTGATAAAAATACAAAAGTTTTAGTACAGGGTTTTACTGGTAAAAATGGTACTTTCCATTCAGAACAAGCTATTGCTTATGGTACAAATATTGTAGGTGGCGTAACTCCTGGTAAAGGTGGCACTACTCACTTAGATAGACCAGTGTTCAATACAATGGCTGAAGCTGTAGCAGCTACTGGTGCTGATGCGTCTGTAATCTATGTTCCAGCTCCATTTGTAAAAGACTCTGCAATTGAAGCGATCGATTCTGGTGTTAAGCTAGTAGTAATCATTACAGAAGGTGTCCCTACTCTAGATATGCTAGTAGTTAAAGAGTACTTAAAAGATAAAGATGTGAGAGTAATTGGTCCTAACTGTCCAGGGATCATCACTCCAGGTGAGTGT…
FTT0504c	FLH151300.01X	FtCD00020437	DQ681701	sucC	Succinyl-CoA synthetase beta chain	ATGAACTTACATGAATATCAAGCTAAAGATCTTTTAGAAAGCTATGGTCTAAAAGTTCAAAAAGGTATCGTAGCTCATAACCCAAATGAAGCTGCTCAAGCATTTGACCAATTAGGTGGCAAATTTGCTGTGGTTAAAGCTCAGGTACATGCTGGTGGTCGTGGTAAAGCTGGTGGTGTAAAGGTTGTTAAATCATCTCAAGAAGCTCGTGAAGTAGCAGAAAGCTTAATCGGTAAAAATCTTGTTACTTTCCAAACTGATGCTGAAGGTCAGCCAGTTAATTCTGTAGGTGTATTTGAAGATGTATACCCTGTTACTCGTGAGTTATACCTTGGTGCGGTAGTTGATAGATCTAGCCGTAAAGTAACATTCATGGCTTCAACTGAAGGCGGTGTAGAT…
FTT0505	FLH204724.01X	FtCD00022918	DQ681702		hypothetical membrane protein	ATGTTTGATTATATATTTAATAAAATTAAGGCGACGGTTTTCTCCAAAATTACCCCGGCTCAATTGCTTCTTACAGCTATTTTAGCGTTTGTATTTGGGTTTGTTCCAGGTATTGCTTATTCACCATTACTTTTTATAGGAGTACTATTTCTAGTTATAATCCTAAGGATAAATATCGGTGTATTTGTTTTTATTGCAATTATTGCTAAAGCGCTCTCTTATATTTTACAAGGAATTAGCTTTGCAGTGGGGACATTTTTACTTGATGGTTTCACGCAGCCATTATTTAAAACTTTAGTAAATACTCCTATAGTTGCATATGCAGGTTTTGATTATTACCTTGTAACAGGTGCATTTGTTGTTGCTATAGTTTTAGGGGTGATATTTGGGGTTATTATC…
FTT0506c	FLH204652.01X	FtCD00022876	DQ681703		hypothetical protein	ATGCCAACACCAAAATATTCATCATCAATTGACATAATAGCTGATAATAGCAACCAACCTCTTAGTGAAGAGTATATCAATATCTACAACACAAACTCGACAGTAAAATCACAAATCATCAAACTCCCTGCTAATTATGAAGGTACTGAATACATACTAATAAACTCACATTTTTATCAAGATCAATATATCTATAAAGCAGATCAGCTAAGAAACAATGTTATCGTAAGATGTGGCGAAACAACTGAAGTAAAAATTAAATACTATAAAGAAATACCCTCAAATAGACGCTCTGACGCAAGGGGGTTTAGATAG
FTT0507	FLH151439.01X	FtCD00020450	DQ681704		conserved hypothetical lipoprotein	ATGAAAAAATTATTAGTAACTTTAGGTATTTCTTCAGTATTGATATTGTCAAGTTGTGCTAACCATCAAAATATTCAAGCACAGGAGGCTAGTGTAAATCATAAAACTTCTAATGATTATGCTAAAATTATAGCTATTCCAGATATTGTTAAAGATTTGTTAAGTGATCCGTCAACACCTACAGTAGGACCACAAGATGCTAATAAAGCGGTTGTAGTATTTTTTGATTATGGTTGTGGTAAGTGTGCCGAAATTTCTAAAGAAATTAACAAGCTTATGAAAGAAAATCCTAATGTGAAGTTTATTTTTAAGGCTTATCCTTCAGTAAAAAGAGATGCTAAGGTTGCTAATTATGCTTCACTAGTTGCTAATGAAGCTTATTTGCAAGGAGGCTCTGAG…
FTT0508c	FLH204655.01X	FtCD00022877	DQ681705	dusA	RNA dihydrouridine synthase A	ATGAAAATAACAACTAGAAAAATTTGTATAGCACCAATGCTTGACTGGACTGATAGGCACTATCGTTACATGATGCGTCTAATCACCAGGCATACAATGTTATATACTGAAATGGTTACTTTAAACGCAATCTTACATGGTAATAAAGAATTTTTGCTTAAATATAATCCTCAAGAAAATCCTGTGACACTACAGTTAGGTGGTTGCGTTCCAAAAGACTTTATCAGTTGTGGCAAGCTTGCCGAAGAACTTGGCTATAATGAAATTAACATAAATGTTGGCTGCCCAAGTGAAAGAGTTAAAAAAGGTAATTTTGGCTTATCATTAATGGCAGAGCCAGAGCTTGTAGCAGACTGTGTCAAAGCTATGAAAGATAACCTAAATATCCCAATTTCAGTT…
FTT0509c	FLH204725.01X	FtCD00022919	DQ681706		hypothetical protein	ATGAAAAAGAAAAACATATTGTTCTTAATATTAATAGTTGTTGTTATAACAGCAAGCTTTTTACTAGGAAAAAAGTCAGGTTTTAATAAAGCTGAGTCAATTCATGAAAGTGAGCTTAGAATACTTGAACAAAGTAAACTATCTCAAACACCTGAAGATAGTTTGAACTGTCGCCCTGAAGTTAATCCAAACAAAGATAACTATGTGATTGGTTATGGCAGCCTTATGAATAAAGATTCTAGACAGATAACAGTTCCAAATGCAACATATGCCGCACCAATTTTAGTTAGTGGTTTTGAAAGGTTATGGGCTTCACGTGGTGAAAAATCTCGTGCTACATTCTTACTTGCAGTTCCAAACAAAGGTTATGCAATGAATGCAATATATTATAAAGCCGAT…
FTT0511	FLH204641.01X	FtCD00022868	DQ681707		Pyridoxine/pyridoxal 5-phosphate biosynthesis protein	ATGTCAGATATTAACATAAAGATAGGTTTAGCAGAGATGTTAAAGGGTGGAGTTATCATGGATGTTGTCAACGCTGAACAAGCAGAGATAGCTCAACAAGCTGGTGCAGTGGCTGTGATGGCTCTTGAGAGAGTCCCTGCTGATATTAGAAAAGATGGCGGCATAGCTAGAATGTCTGATCCTAAACTTATCAAAGAGATAATGTCCGTAGTTTCAATACCTGTTATGGCAAAAGCTCGAATTGGTCATTTTGTTGAAGCACAAATCTTAGAGTCATTGGGTGTTGATTTTATTGATGAGAGTGAGGTTTTAACTCCAGCTGATGAATTGAATCATATTGATAAAGATAGTTTTAAAGTGCCATTTGTGTGTGGTTGTACAAATCTTGGTGAGGCTTTG…
FTT0512	FLH231472.01X	FtCD00039368	DQ681708		SNO glutamine amidotransferase family protein	ATGGTAATAATGACACAAAAAGTCGGAGTATTAGCAATTCAAGGAGGCTATCAAAAGCATGCTGATATGTTCAAGTCTTTGGGAGTTGAGGTTAAGCTAGTTAAATTTAACAATGATTTTGATAGTATTGATAGACTTGTTATTCCGGGTGGTGAGAGTACAACTTTATTAAATCTACTTAATAAGCATCAAATTTTTGATAAGCTATATAACTTTTGTAGTAGTAAGCCAGTTTTTGGTACATGTGCTGGTAGTATAATTTTATCAAAAGGAGAAGGATATCTAAATTTGCTAGATCTAGAGGTTCAGAGAAATGCTTATGGACGTCAAGTTGATAGTTTTGTTGCTGATATAAGCTTTAACGATAAAAATATTACGGGTGTTTTTATTAGGGCTCCA…
FTT0515	FLH151791.01X	FtCD00020514	DQ681709		hypothetical membrane protein	ATGCAAATTATAACTGTGAGTGAGTATTTAAGAACAAGATTAAGTGAGTTAGGAATAAAAGATATAATAGGTGTTGCTGGAGATTATAATTTGAATGGCGTCGAGATTGTAATCAATTATGTGCTAGTTATGCTGTTGATGATTATGCTAAGACTCATGGGATTAGTGAAGAAATAG
FTT0518	FLH204639.01X	FtCD00022866	DQ681710	prmA	50S ribosomal protein L11, methyltransferase	ATGCAACAATGGCACCAATTAGAGTTTAGACTAAAATCCAAATATTTTGATAGAATAGAGAATTATCTTTTTGATAATGATGCAGGTTCTGTAACAAGGATAGATAAGTCTGATGATATCATTAGTATTACTGTTTTATATGAGAATCATCATGATATAGATACTATTATAGCTAATATTAAACAAAAGTTTGAAAACATAATAGAAAGTGAAATAAGTTATGAGATTATCAAAGATCAGCAGTGGGAAGCAGCTTGGTTATATGATTATGAACCTATAGAGATTGGTAATAATATAGTCGTTTATCCAAATTGGCGTCAGCCTCCACAAGATAATAAGCATACATATATAATAGTTGATCCAAGTATTGCTTTTGGTTGTGGTAATCATGAGACGACT…
FTT0519	FLH151984.01X	FtCD00020532	AY775011		Nif3 family protein	CTGGACTTTAAAATTGCAGATATTGAAATCGAAAATAATGTTGTACTTGCACCAATGGCGGGTTTCTGTGATAGTGCATTTCCTACTATATGCAAAGAGCATGGGGCTGGTCTGATATATACGGAGATGGTTAGTAACAAAGCCGTAGTAGAGCATAATTGGGAAACCATGGAAATGCTCTATATGGAAAATAGTGAAAAGCCACTTGGTATACAGATATTTGGTACAGATATTAATAGTTTTGTTGGTGCGACAAAATATATCGCAGAGAATACAGAGTGTGATTTTTTAGATATAAATATGGGTTGTCCTATGCCAAAAGTTGCTAAGAAGTTACAAGCTGGAGCGGCACTTCTAAAAGATGTTAATAGAATCCATGAGATACTAACAGCTGTAGTA…
FTT0520	FLH151787.01X	FtCD00020513	AY774983		hypothetical protein	TTGGATCAAGAAGTTAAGCTTACTAGCTCAAGCCGTGGTACAGGCAGAGCATTAGCTGATTTAATTGTTTGGAAAAGTGCTGAAGACAAAAAGAAAAATAAAACTGCTTTTATGGTCTTAGAGTTTAAAGCTGAAAACCTAGAACTAAAAGTAGAAGACTGTTATCAGGGTTATAACTATGCAACTTGGTCAAGAGCAGATCTTTTTGCAGTATCTAATGGTAAAGAAACTCAAGTTTATAAAGTTGTAGATACCGAGCTACCTTTAAGTTTGAAGCCTCTTGGTGAAATACTAAATGCTAATATTATAAATAATGCAAAGAAACTAAAAGAAGAGCTAGAAAAAACGGTAGAGTTTAAGGGCGATGAGTTTGCAAAGGTTCTAAATAAGTGTCATAAC…
FTT0522	FLH231459.01X	FtCD00039362	DQ681712		hypothetical protein	ATGGCAAGAGTATCTAAAATGAATATGATAATGCATGGAGATGGGCATAATGGTATTCATCATAATGATGGTTTGCTAAATGTAAATGGTATTTTTAGAAATCGTTTTGATGTGATTTTGACAAATCCGCCATTTGGTACAAATCTTGGTAAAGATAATTCTAAAGTCTCAGAAGAAGATAAATATACCGATGAAAAGATGATAACACACTATAAAAAAATCTATGGTGATGTTTATGAAGAGGAGCTAAAACAGGTTACAGATAACTTTGGTAAACCAATCAGAAGTTTATACAAAACTGGTGAAATATCAGTAGCAACAGAAGTTCTATTTGTTGAGAGATGTTTAGACTTACTAAAAGCTGGCGGTAGAATGGGTATAGTTTTGCCAGAAGGTGTA…
FTT0523	FLH204679.01X	FtCD00022888	DQ681713		hypothetical protein	ATGGTTGAATTAAATAATTTTTTGTCTAAAGCAAATATTGAGTGGGTTAAAATACAAGATAAAGAAAGTTATCCTATATTAGGAGTTCGTGGGCAAGGACAAGGAGTTTATATAAATAGAATAGCTAATGGTAAAGAGCTAACTATGAAAAAATACCAAAAATCTGAGCCTTATCATTTATTTTTTTGTAAGGTTAGAACAGTCAAAGGTCAATGGGGAGTAGTTTATCCAGAATATGCTAATAGCTATGCTTCCAGCAATATGCAATATTTGAAAATTGATTTAGATAAAATATTACCCGAGTATTTAGAGATGTTGCTTAAACTCAAAAAAATAACTGATATTTGGGATAAAAACGCAATAGGTGCAGATGGTAGGCATTTTCCATTAAAAATTTTA…
FTT0524	FLH204658.01X	FtCD00022879	DQ681714		hypothetical protein	ATGAAAAGAATATTGCCATATAACCCAAAACTAAAAGATAGAGCTAAAGAACTTAGAAAAGCTGGTATTTTATCAGAAATTTTATTATGGCAAGAGTTAAAAAGTCGCAAGTTTTTAAACTTGGATTTTGATAGACAAAAAGTAATTGGTAACTATATTGTAGATTTTTATTGTGATGATTTACGGTTGGTGATAGAAATAGATGGCTCAAGCCATGATGATAAACAAGAATATGATAGTATTAGAGATTTATACTTATTAGGTTTGGATTTAAAAGTTTTACATATACAAGATATAGATGTAAAAAAGAACCTAGATGGTATGATAAGATATTTGGTAGATTATTGTGAAAAGTTGGGAGCTAATAACACGCCTCCCTCTGCATAG
FTT0525	FLH231477.01X	FtCD00039370	DQ681715		hypothetical protein	ATGAAGATTACAAGACTAAAGATAAAAGGATATAAGAATCTAGATATAGATATTAAGCATGAAAGCGACATTATGGCTTTTATCGGGCTAAATGGTAGCGGTAAAAGTAATGTTTTAGAAGCTTTGAGCTTTATATTTAGAGAGATTTATAAGAATAAACAAGAAGATATTCTTAAAAAGGTTTGCAAAAATATCCCATTTGAATTTGAAATTTATTTTAAAACTCAAAACTCTGAAGATAGCACATATAGATTTATAGGAAAAAAAGGAAATTTTACCTTTAGTAACTCATCTTTTGATGATGAACCTTATGGAATTGATGAAAGAGCTTTTGTTGATGCAGTGCCAAAGAAAGTAGTTACTATCTATAGCGGTGAAGAAAAAAGATTTTGGACAAAA…
FTT0526	FLH151807.01X	FtCD00020515	AY774989		hypothetical protein	ATGAAAGAAGGATATTCATTAGTAGAATTAAGAAGGATACTAGAAGTTTATCCAAGTAATGAAGTTTTTGAGTATTTTTATAATGCTTTACTTAGTGAAATGATAACTGATATTCAGATATTTTTTAATGATGATAATTTAACAATTGGCGATTTAAGTGAAGGAGAAAAAAGCTTTTATTACTTAAAGCAGCCTTTGAGTTTGTAG
FTT0527	FLH204635.01X	FtCD00022862	DQ681716		hypothetical protein	ATGCTAGATGAACCAGATTCACACATTCATTTAGATAATAAGAAACATATTATAGATATTCTTGAACAATATAAAGATAATCGTCAGTTTATAGTTACGACACATTCACCAACTTTAACAAAATGTATAAAAGATTTAGATAACGATAATGAAAATAGAGTTTATGTTTTGGATAATGGTAAAAATATATCTACAGCAAAAACTAAGCAGATAGAGCATTTAGTTGGAGATTTTTGGAACTCACAAGAACAGACAGTTTTTTTGTCAAGCCATAAAAATATGGTTTTACTTGCTGAAGGTAAGCACGATAAAGAACATATTATAAATGCTTGGAAACATTATAAAAATGATTATCCAACTTTAGATTTTGATGTTTTTAGTATGGACTGTGCAGAAAAT…
FTT0528	FLH204656.01X	FtCD00022878	DQ681717		hypothetical protein	ATGAATGAAATGAATAATATTGGCAAACAGCCACAGCCACAAGATATTTCTAATAAAGAAGATCATATAAAACAAAAAGTTAAAGAAAAAAATGAAGCCTTTCGTATAGGTAATTTAATTACAGAGATTACAGATGCAAAAACCTATGAAGAGAGTTTTATACCTATATATGGAAGTTATAAAAACAAAGTTATTGAAGCAAAGTATGATTTAAATTCTAAAAAGGTTGTTTATAATGACTTGGTTGGTTCACCAAGTGCTATGGCAAATCAAGCTGTTTGGGATATGGGGGCGCCTAAAACAAGCACTAGAAACGGTTTAACCTTTTGGAAGTATGAAAAAGGAAGAGACTTAAAAGATCTACATGAGAAAATATAG
FTT0530c	FLH231474.01X	FtCD00039369	DQ681718		DJ-1/PfpI family protein	ATGTTGGAAATAGTAACTATTTTATATGATGATTTTGAAACTCTAGATGTATTTGGTCCGATTGAAGTCTTGGGAAGTTTTAAGGATATTTTTAAAATTAACTACTATTCGATTAATGGCGGTATTGTCAGTAGTAGCCAAGCAGTAGAAATAAATACTAAAGATTTCTCGCAGGTAATATCAAAAGAGTATGTTCTATTTGTACCTGGTGGTATCGCTACTCGACAACTAATTAATGATAAAAATCTGATAACAAAACTTACTAAATTAGCAATTGATGCCAAATATATATTTACAGTCTGTACAGGATCATCTCTATTTTCAAAAACAAATCTGCTAAATGGCAAAAAAGCTACTTCTAATAAAAAAGCTCTTAACTGGACAAAATCGATCGCACCG…
FTT0532c	FLH204681.01X	FtCD00022889	DQ681719	nrdB	Biofunctional protein, glutaredoxin 3 protein/Ribonucleoside-diphosphate reductase, beta subunit	ATGGTCGAAGTAAGAATATATACTAAAACAAATTGTCCTTTTTGTGATCTTGCAAAAAGTTGGTTTGGTGCTAATGATATCCCTTTTACGCAGATATCACTTGATGATGATGTCAAAAGAGCAGAATTCTATGCTGAAGTAAATAAGAATATTCTTCTTGTAGAAGAACACATCCGAACCGTACCACAGATATTTGTTGGCGATGTACATATCGGCGGTTATGATAATCTTATGGCTAGAGCTGGTGAGGTGATTGCACGTGTTAAAGGTTCATCGTTAACTACTTTCTCAAAAACATACAAGCCTTTTAACTATCCTTGGGCTGTTGATCTTACTGTAAAACATGAAAAAGCTCACTGGATAGAAGATGAAATTGATCTTTCTGAAGATGTCACAGAT…
FTT0533c	FLH151849.01X	FtCD00020521	AY774981	grxA	Glutaredoxin 1	ATGAAAGTAAAAATATATACTAGAAATGGTTGTCCATATTGTGTTTGGGCAAAACAATGGTTCGAAGAAAATAATATAGCTTTTGATGAAACTATAATTGATGATTATGCTCAACGTTCTAAGTTTTATGATGAAATGAATCAAAGTGGCAAAGTTATCTTCCCTATTTCAACTGTGCCACAAATATTCATAGATGATGAACATATAGGTGGCTTTACAGAGCTTAAGGCTAATGCTGATAAAATTTTAAACAAAAAATAG
FTT0534c	FLH204718.01X	FtCD00022917	DQ681720	nrdA	Ribonucleoside-diphosphate reductase, alpha subunit	ATGTCTAATCAAAGCTATCTTGGCATTAATATTGATTTATCTAGAGATCGTGAGCTTTCAGAACAAGCTCAACAACTACTGACAAACTATTATTGCTTACAAAATGAACCCTCTCCTCAATATGCTTTTGCACGAGCTGCTGTTGCTTATTCTTTTGGGGATATGAACCTAGCTCATCGCATTTATGATGCTGCTGCTAAAGGTTGGTTTATGTTTGCTTCACCTGTGCTTTCTAATGCACCACTTCCAGGTGTAAAAGTAAAATCTTTACCTATTAGTTGTTTTTTATCTTATGTGCCAGATTCATTAGAAGGTCTTATCGAGCATTCATCAGAACTTAGATGGTTATCAGTAAAAGGTGGAGGTGTTGGAGGACACTGGTCTAGTGTTCGCGCGGTA…
FTT0535c	FLH204649.01X	FtCD00022873	DQ681721	mdh	lactate dehydrogenase	ATGGCTAGAAAAAAAATAACACTTGTTGGTGCTGGTAATATTGGTGGTACACTAGCTCACTTAGCACTTATAAAACAATTAGGTGATGTAGTCCTTTTTGATATAGCTCAGGGCATGCCTAATGGCAAAGCACTTGATTTACTACAAACTTGCCCTATCGAGGGAGTTGATTTTAAAGTCAGGGGTACAAATGATTACAAAGATTTAGAAAATTCTGATGTTGTTATTGTAACTGCTGGTGTTCCGAGAAAGCCTGGCATGTCTCGTGATGACCTACTTGGTATTAATATCAAAGTAATGCAAACAGTCGGAGAAGGTATCAAACATAACTGTCCTAATGCTTTCGTAATATGTATCACAAATCCACTAGATATTATGGTAAATATGTTACAAAAATTC…
FTT0536	FLH204668.01X	FtCD00022883	DQ681722		hypothetical membrane protein	ATGATGCTCAAGAAAATTACGAATAATTTTGGTTTAGCTATAGGCATTATCGGATTGATTATATTTATGTTTGGTCTAACAGAAACTGATACTGCTCAGAAAAATCTAATAGTTCTTTTTGCTACTTTCTTCTTATTTTTATCAGCTGCTATCCAAAAAGAGCCTTTTTTTACTGGTTTACAAGGAATAGCATTTGTAAGTGCTATTATGGTTTTTTATAATTTAGCGGCGATATATAATTTGTTAGTGTTTATATTTCTAGCATTTGTGTTTGCCATTTACTACTTCTCTAGGCATAAATTAAATATTGCTAGAATATGTGCTTTTATAGGATTGGTTGCATTATGTCTTGGTATACTTTTAGGCAGAAATGAACCAATGGTAGTGTGTGGTATTGTT…
FTT0537	FLH151821.01X	FtCD00020517	AY775014		ubiquinone biosynthesis protein	ATGAGGAAGTTATCATTTTTAGATAGGGTTATCGAGGAGCTTGATAGTTATGCTAGATTTACAAAGGTACCATTAAACCCAAGTAAAAAATCTCCTAGTTCTGATACTATAGATGGAAAGTTATCTGAAATTGAAAAGAAACATTCAGCTGGTTTGATGAGAGTTGATTACACTGGTGAGATTTGTGCTCAAGGCTTATATAGGGGCCAAGCTAGTGTAGCTAAATCACCACAAACAAAAGAGCATTTATATCATGCTGCTGCTGAAGAATATGATCATTTAGCGTGGTGTGGTGAGAGACTTCAAGAGCTAGGAGCTAGACCTAGTTTACTTAATCCATTTTGGTATTGGACATCATTTGGTATTGGTGCAGTTGCAGGGTCTATTAGTGATAGCTTG…
FTT0538c	FLH152100.01X	FtCD00020539	AY775017		conserved hypothetical lipoprotein	ATGTTAAAAAAATTTGGCTTTAGGTACTTTGTAGTAAGTCTATTTTGCTTGTTATTACTAAGCTGTTCTGAAACAACAAAGATAGATACTAATGCAGGGGTATGTGAGATACTCAAACAGCATCCTAACTGCAAAAAATCACTCAAACAATCACAAGCAAAATACAATCTTGAGCCAGCTTTTATTATGGCTTTAATTTATCAAGAATCGCGTTTTTATGCAAATGCAAAAAACAAATACTCATCAGCTTATGGATATGCTCAGGTAATCGATAGCACTTGGAAACACTTTCAACAACAAGTCAAAGCAAATGCTAAGCGTAATAACTTCGATGATAGCATAGAATTTATTGGTTGGCATATGACACAATTATCAAAAAGTTTAAATATTAAAATGACA…
FTT0540c	FLH204708.01X	FtCD00022909	DQ681724		hypothetical protein	ATGAAAAAAACCATACTTTTAAGCTTAACTTTGTTTTCTTGTCTAGGCTATAGTAATGTTGTAGATACAACTACTTGGAAAACAGCAGATGTAGTAAAAGATTTCAAATCAAAATACTTTTGTAATAAAAACCTTTCTCAGCAAGACTGTGATAAAAACATTAATAATGTTGAACAATATGGTATTGATATTGATTCATTAGTAAATACTGATATCAAGAGCATTAAACTTGATAAGATAACATATCAAACAACAAATACTTTTGCTGCAATAGGTAAAATTACCTCAAATGTATCTGGACTACTAATGATGCCTGATACTGACTCACCTAAAGGTGTTATCTTATACTATCACCCTACTGTATTTGATAATGCTGCTGTGCCATCAAATTTTAGTAAC…
FTT0541c	FLH204678.01X	FtCD00022887	DQ681725	yqaB	haloacid dehalogenase	ATGATTTCAGAAAATAACATGCTTTTACCTGTACATAAAAATACTAAATTATTAATTTTTGATTGTGATGGTACTATCGCAAATAATATGGATATCCATATAAATGCATGGCTTAATGTTCTAAAAAATACAAAAGTTCAGATTGAATCGGTAGACTTTGATAAATATAATGGCTTGCCTAGCGAATATATTCTAAAAGAAGTTTTTAATTTCGATGATATTCAAACACCTAAAATAGCTGCTGAAATAAAAAAAACCTCTTATCAACTACTAAGTCAAACAAAACCTATTGAGCCTATTGTTGACTTGATTAAGTACTATCATAATAGAATACCTATGCTAGTGATATCTGGCGGCAAAAAATTAAATGTATATAAATCTCTTGACGTACTTGGACTT…
FTT0543	FLH231478.01X	FtCD00039371	DQ681726		hypothetical protein	ATGAGAAATGCTTTTATAATTCTATTGAGTTTGCTTTTGCTTACTTATAATAGCTATGCAGCTAACCAAGTCTATGATATAGATACCCAAAAACAACTTATTCAAACTGATAAAACCAAGAAATCAATTAAAGCAGACAATTCAGCAGTCGATGTTGTCGAGCAATATGAAGGTGAATCTATAGTTGCGGGTAATACTTTTGATGTTGGTAAGACACTTTTGAAAATAACTCACGCAGATAAGGTTAAGCCACCATTTTTTGATGGTATAGATAATAATGTAATATTTTCTCAAGCAATGCTTAATACCCAGCAACAAACCGGTGATCCTGAGTTTATTTTATTATCACGCCAAAATGGATTACTAAAAGATAATTATCTGTATTTGGGGGGAATGGCT…
FTT0544	FLH151869.01X	FtCD00020522	AY774984	phnA	phosphonoacetate hydrolase	ATGACTACTTTACCACGATGTTTAAAGTGTCAATCAGAATATGTCTATCAAGATGATCAATTGTTGATTTGTCCTGAGTGTGGTTATGAATGGCAAGCTGATGAAATTAGCTCTAATGAGTTGGTAATTAGAGATTCAAATGGAAATTCTCTTGCAGATGGAGATTCAGTAGCTATAATAAAAGACCTAAAACTAAAAGGTTCCTCTCAAGTTATAAAGGTAGGTACTAAAGTAAAAAATATTCGCTTAGTAACAGGCGATCATGATATTGATTGTAAGATTGATGGCTTTGGCGCAATTCAACTAAAGTCTCAGTTTGTGAAAAAAGTATAG
FTT0545	FLH204642.01X	FtCD00039258	DQ681727		hypothetical membrane protein	ATGAAGTTTGAAAGACTACTGTTTTTGATAATTTTTATATCTATTTGTAGCTTTTGTTACGCATATTATGTCAAAGATAATGGTAAGAAAATTATCGTTAGTAAAAAAGTAGCAAATACGATCGATGATATAGAAATACAAGAGGGTGAGTCACTTACTCAACAACAAATTATTGACATAATCGAAAATAGTAGTGGCTCAACAGAAGAGTTATAG
FTT0546	FLH204684.01X	FtCD00022892	DQ681728		hypothetical protein	ATGTTTAGAAAATTAGTTGCTCTAGCAAGTATTTTTACAATATCTACATTTTGTCTAGCTAGTGCTGATCAGACAACTGAGCAGTCAGAGTCTTCTAGTTCTTTAAACAATAATTATTCCCCAGAGAGTATTCGGAAGCTTGAATCTAATGCTTTTAGAAGAGTTTTCCCTAACGAAGCTTATATAAAAGATAATGTTCCTTTAAGCTCAGAACAGCTTGAAAAAGCAGCAATACAGGCTATTCAGGATTTATCAGTTAAAGAGGGTGAAGCATTAACTGATAGTGAAAAACGTGCACTTGCTAAGAGAACATTTGATAATAAGATTAATAATGCTCTTAACATTAATGCTATCAAAACTTCTTTTTTTAATGGTTTTCGTGTTAGTGAAACTTTCACT…
FTT0547	FLH152068.01X	FtCD00020538	AY774988		hypothetical protein	ATGGAAACAGCAGGAGATTACCAGTTTCTTGGTTTAGCTTATTCAAATGTTTCAGGATTTCAGACAAAAAATGGTGGTAACGTTGGTACATTCGATGTCAATTATGGTTTGGCAATTTCAGATATAAACTTTGAAGCCGAAGCATTAATAACTGATAAAGGAGTAGGAGAGATTAATAACTCATCTTCGGTTAGCCCAAATAATATTGCAGGTGTTCCTTTTTTTGGCTCGGTAGGTCCAAGTGCTAAATTGATATATGATGGCTTTTTAGGTTCTGGTGCTAATGTAGCATCATGGTCTACACAAACAAGTTATACAGCTACAGTTTTTAATAGACGGGTTATCCCATATGTTGATTATTCTCAAATACTTCAAAATACCAAAAACTACTCATATCAA…
FTT0548	FLH151837.01X	FtCD00020518	AY774975	dnaQ	DNA polymerase III, epsilon subunit	ATGTCACGACAAGTTTTTATAGATACTGAGACAACTGGCTTTGATTATAAGATTGGTAATAGAATTATTGAATTTGGTGCAGTTGAAGTTATTGATAGAAGGATAACAGGTAATAATTTACATTTTTATTGTAATCCAAATTATGAAGTTGAAGCTGGAGCTTTAGCTATTCATGGTCTTACAAATGAATTTCTAGCAGATAAACCTCTTTTTGAGGATAAAGTTGATGAGATGATTGAGTTTTTAAGAGGTGCTGAAGTAATCATTCATAATGCAGCTTTTGATGTGCCATTTATAAATTGGGAACTTAGTCTCTTAAAAAATAATAAATACGGAACATTAGAGCAAAATGTTGCTAAAATAGTAGATAGCCTTGATTTAGCTAGAAAAAAACATCCA…
FTT0549	FLH231464.01X	FtCD00039364	DQ681729	vanY	D-alanyl-D-alanine carboxypeptidase	ATGGTAAGAAAAATAATTTTTCCAGAAGCAAAAGAGCATGAGCTTATTTCGGCAGGTAAAGATTTTTTTGCTAGAGATTTACTTTTAGAGAAAAATACTTATAAAGCTTGGTTAGAGCTAAAACAAGCAGCGACTGATGATGGTATTAGTCTATTTATAGTTTCAGGTTTTAGAAGCTATGAATATCAGCAGAAAATTATAGATAGAAAGCTTGCTAATGGACAAACTTTAGAAGAGATTATCAGGGTAAATGCTTTGCCAGGAGAGAGTGAGCATCATACGGGTAGGGCTATTGATCTAACAACTGGGGATGAAAAAGAGGTTTTGACAGAGGATTTTGAAAAAACTTATGCTTTTGAGTGGTTAGTTAAAAATGCACATAAATATGGCTTTAAGTTG…
FTT0550	FLH204699.01X	FtCD00022903	DQ681730		hypothetical protein	ATGAGCCATGGCACTGGTGTTATCACAATGAAAAATGTTAGTAGATTTTTATTTGTAAGTATATTTGCAATATTACTAAACTCTTGTAGTACAGCAAAGAAAGATGTCACAAAACTCGAATTTGTTTCTAGTAGTTATCCTTGGATATTTAGCCCTGTGCGAAAAGAGCTAGCTCAAGGTGATGTAAGTGAGACAATCAAAAAAAATAATAGTATCGGCAATGTTAGGCAGCTTAAAAGTCTCAATCAACTAGAATCTGGAAGATTATCGCAACTAAATAGTGATTCTAAAGCCTCAATAGAAATCTATAGTAAAGCTATAGAGTCGCTACCTAAAAATCAGCAACAGTCTCTAGATCAAGCAAAAAAAATACTTTTAAATAGAAATACATATAATTAC…
FTT0552	FLH153298.01X	FtCD00020631	AY774589		aldehyde dehydrogenase	ATGAGTATTTTAAAAGAGCTAGATTTAGGTTTACAAGCATATATCACTAACGATACTAATAACGTTATAGAAACTTTAAATCCTGCAACTGGTGAGCTATTAGCTAAAGTTAGAAACCAAAGTGTAACTACTATGCAGGAGGCTATAGCAAAAGCTACAGAAGTTGCTAAGCAATGGCGACAAGTTCCTGCACCTAAAAGAGGCGAGTTGGTTAGACTTATCGATGAGGAATTACGTAGAAACAAAGATCATCTAGGTAGTCTAGTATCTCTTGAGATGGGTAAATCTAAACAAGAGGGTGATGGTGAAGTCCAGGAAATGATAGATATGGCAGATTTTGCTGTAGGACAATCGCGTATGCTTTATGGAATGATGATGAATTCTGAGCGCCATAATCAT…
FTT0553	FLH151888.01X	FtCD00020524	AY775009		hypothetical protein	ATGAGCGTTGATATTTTAGATAAGTTATGGGATCAATATATTCGTGATAATCCCCATGCAAAAGAAATTTATGATCTGTTTGTAAATAATGGCGAGAATCCTATAAATGATCATATTGCATTAAGAACTTTAGATGATGATAGGATAAATATTTATAAGCTAGCAGAAGTTTTTATTGATAAAGGCTATAGTATTTGTGATGATTATGATTTTGCAGTAAAACATCTTGAGCATAGTGATAAAACTCAACCAAAAGTATTTATTAGTCAGCTTTTAACAAATGAATTCTCAGAGGAATTACAGCAGACACTAAAAAGATGTGTTGATCTAATACCACAGCAATTGCTGAATAATCCAGAAAATTTACTATTATCTGGTGTAAGCTGGCAAATTGATTAT…
FTT0554	FLH204648.01X	FtCD00022872	DQ681731		hypothetical protein	ATGTCAAATCCTTGTCATAAAAAACATTTAGTTAAACTTAATAGGGTAACTGGTCAAGTCGAAGCAATCAAAAGAATGATTGATGATCAGCGTTATTGTGTTGATATTATTACCCAAATAAAAGCAGCTCGAAGTGCATTAAAATCTATAGAGTTGAGTATTTTAGAGACACATATGCAATCTTGTCTAGAAAAATCTTGTCAGGCAAATTCTAAAGAGGTACTAGAGCAAAGAATAGCAGAAATTATGAAACTTTTAAGAAAATATCAATAG
FTT0555	FLH229970.01X	FtCD00039261	DQ681732		conserved hypothetical membrane protein	ATGAATAAACAACAAGCGATAATTTATAGAATGGTAACAGATAAACATATCTGTCCTTTTGGTATTAAAGCCAAAGATTTACTAAAACGCAAAGGTTACTTTGTAGAAGATATTCATCTTAAGGATAGACAACAAGTAGATGAATTTAAAAATAAATATGATGTCAAAACTACACCACAAATATTTATAGATGGTAATAGAATTGGTGGATATGATGATTTAGTTAAATTTTTTGGCTTAGTAAAAGATAAACAAGCAAAATCATATAAGCCTGTAATAGCAGTTTTTGCGATGACTTTTTTACTAGCGCTAGCATTTGGTTATTTTATTGCGGGCAATATATTTGCTTTATTGACCATAAAGGTTTTTATGGGATTAAGTATTGCATTTCTAGCGATG…
FTT0556c	FLH151500.01X	FtCD00020461	AY774902	oxyR	oxidative stress transcriptional regulator	ATGAATACACGTACTCTTGAATATATCATTTCTGTGTATGAGACAAAAAGCTTTATTACAGCATCAGAAAAATGTTTTGTCAGCCAACCTGCATTAAGTATGCAAATAAAGAAATTTGAAGAGTATATTGGTATCCAAATTTTTGAGCGCGGTACAAAACAAGTCTTGATAACTAAATCAGGAATGAAAATCGTCAACCAAGCTTATAAAATTCTTGATGAAGTAAATAATCTTAAGAAAATTGCTGAGCTACTCTTAGAGAATGGTAAAATCAGCATTACTATTGGCGCATTTCCAACTCTGTGTCCATACTTAATGCCTAAAATTCTCCCTGCTATCAAACAAGAACTTCCGAATCTAAGTATTGCTGTAATTGAAGAAAAAACAGACATCCTTGTT…
FTT0557	FLH204670.01X	FtCD00022884	DQ681733		AhpC/TSA family protein	ATGACTAAAAAAGTACCTAATGTAACTTTTAAAACAAGAGTAAGAGATGAGAGTATTGGCGGTTCAAATCCATTTAGATGGCAAGATGTAACATCAGCTGATATTTTTGATAATAAAAGAGTAATTGTATTCTCATTACCAGGAGCATTTACACCAACTTGTTCAACTTATCAATTACCAGGTTTTGAAAATAACGCAGCTAGATTCAAAGAGCTAGGTATAGATGAGATTTATGTTTTATCTGTAAACGATAGCTTTGTTATGAACAAGTGGATTCAGGTTCAGGGAATTCAAAATATTAAACCGATTCCAGATGGTAATGGTGAATTTACTGAAGCTTTAGATATGCTTGTTGATAAATCAAATATTGGTTTTGGCAAAAGATCTTGGCGCTATGCA…
FTT0558	FLH204682.01X	FtCD00022890	DQ681734		hypothetical protein	ATGAAAAGGATTATTGTTTTTGGTGCGACCGGAACTATTGGTAGAGCAACTACACAGTCTCTGAAAAATGCTGGTTATGAAATAGTAACTGTAAGTTTTTCTGGCGATAAAACTGATTTTGCTGTAGATATCCAAGACTCTCAGTCTATAAAAAGTTTATTTGATAAAATTGGTAATTTTGATGCTTTGATATCAACTACAGGAAAAGTCGCTTTTAAAAATATCACCGCAATAGAACAACAAGATTGGAACTTAAGCTTAAATAATAAACTTCTAGGTCAAATTAACTTAGTGCAAATTGGTTCAAAATATATTAATGATGGTGGTTCGTTTACACTTACTTCAGGAATATTAAATTTTGAACCAATAGCTATGGGTAGTATAGCTGCTACAGTTAAT…
FTT0559c	FLH204692.01X	FtCD00022896	DQ681735	cmk	cytidylate kinase	ATGAACAATTCTAAGATTATTACAATTGATGGACCAAGCGGCGTTGGTAAAGGTACTTTAGCGAAGGCTCTAGCAAAATACTACGACTTTAAACTATTAGATAGCGGCGCCATTTATAGACTAGCTGCCCTACACTGTTTTAAAAATAATGCTAGCCTTGAAAATGAAGATGATGTTTGTAAAACTTTAAGGAATTTAGACATCAGTTTTAAAATTGAAGATGATTTAGTTAAGGCATTTTTATCTAATCAAGATGTAACTAAAGATATACGTACTGAACAAATAGGAATGCTTGCTTCAAAAGTCGCTGCTTACCCTACTGTTAGAGCTATACTTTTAAACAAACAAAGAGAATTTGCTACTGAACAAGGTTTGGTTGCTGATGGTAGAGATATGGGA…
FTT0560c	FLH152016.01X	FtCD00020534	AY775026	serC	phosphoserine aminotransferase	ATGAAAATCAATTTTTGTGCAGGCCCTGCGGTTGTACCTACATCGATAATACAACAACTACAACAAATGATGACAAATTATAAAGATACTGGAGTATCATTATTATCGATTTCTCACCGTGATAAAGTTTTTGATGAAGTTCACGCTTCTATTCAGAAAAATTTAAGAAGTTTACTTAGTATTCCTGATAATTATGCTGTACTGTTAATGCAAGCGGGTGCTACTGCGCAATTTGCTGCTATTCCGCTAAACTTGGCTGATAAGCACAATAAAGCATTATATGTATGTAGTGGTCAATGGTCAGAAAAAGCAGCTCAAGAAGCAGCTAAATTTATCGATGTTGATGCTGTCAAATATGATGATAATATCGCACAAAAATTCCAAGCGAATAAATATGAT…
FTT0562	FLH152032.01X	FtCD00020535	AY774991	potG	polyamine transporter, ABC transporter,ATP-binding protein	ATGCAAAAATCTTCAAAAAAACCTTTGGTTTCTATAAAGAACCTATCTAAACAATTTGATGATGGTCACCTAGCTGTTGACTCTGTAAACCTTGATGTCTATCCAAAAGAATTTTTTTCTTTGCTTGGCGGATCTGGAAGTGGTAAAAGTACACTACTTAGAATGCTCGCAGGATTTGAAAGACCTACTGATGGTAAGATAATTATCGATGGTGTAGATATGTCAAATACTCCATCATACAAAAGACCTGTAAACATGATGTTTCAATCTTATGCATTATTTCCGCATATGAATGTAAAGCAAAATATCATGTTTGGCTTAAAACAAGAGAAGTCCCTTAAAAAAGAAGAAATTGAGAAAGCAACAGACGCAGCTTTGAAAATTATTAAGATGGATCAT…
FTT0576	FLH149956.01X	FtCD00020300	AY774728		hypothetical protein	TTGAGTTATAAAGTTAAGATTATTTATAGGGATGTTGCTAACCTAAAGATTTCTTTAAATAAAGATGGTTTAGTAACAGTGGTATCACCTCAAAAGGTTACTAAGAAAGAAATTTTCAAAATTCTTGAGTCTAAAAAAGCATGGCTTGATAAACATGCTAAAAGATTATCAGTAAATCAAAAATATGATTATCAAAACTATACCTTAAATGATGGAGATTGTGTTTATTTTCTTGGGCGTGAATATCCTATCAAAATTGTTGAGTCAAAGCATAATATTGTCAATTATCATGATGATCATATTCAAATTTTATTAAATCCAAGTGTTATTACAAATAGAAAATTTAAGTTACAACTATTAGAAGAATTTTATAAAGATCAAGCAGATATTATTCTTAAT…
FTT0577	FLH204609.01X	FtCD00039253	DQ681736	sdaA	L-serine dehydratase 1	ATGGAAAGTACGTTTGAACTTTTTTCTATAGGAGTTGGTCCATCTTCATCTCATACTATAGGTCCGATGAGAGCTGGTTGTGATTTCATAAACTTGTATAAAGATAAACTGCCTCAAACTAAGAGTGTTAAGATTGATTTGTTTGGCTCTCTTGCGCTAACTGGGAAGGGTCATAAAACAGATTACGCTGTTGTTTTGGGTGTGATGGGTTTTTTACCAGAATCAGTGGATATTGAATTGGCAAAAAAACTCTATGATGAATGTTTAAGGAATAAAAAACTTAATTTAGGTCAAGAGTTTGAAATTGATTTTGATTATGATAAGGATTTAGTATTTCATTATAATGAGTTTTTGCCAGAACATGCTAATGGCATGCGTTTTTCATTGTTTAATGGTGAA…
FTT0578	FLH150172.01X	FtCD00020323	AY774744	csdB	selenocysteine lyase	TTGTATGATGTATATAAAATTAGGCAAGACTTTCCATTTTTAGCACAAAAAATAAATAATAAATCGGTACTTTTTTTTGACACTGGTGCCTCAGCACAGAAGCCCCAAGCTGTTATTGAATGTGTAGCTGAAGCATATGCTTATAATTATGCAAATGTACATAGAGGTGTATATTCTCTTAGTCAAGAAGCTAGCGAGAAGTATGAAAATGTCCGTCAAATTGTGCAAAAGTTTTTAAACTCTAAATCAGCAGATGAAATTGTAATAACAAAAGGAACCACAGAGGCTATTAATTTAGTTGCTAGCTCTATCGGTAAGGGGATTATTAGGTCTGATGATGAAATAGTTGTCACAGAAATGGAGCATCATGCTAATTTTGTACCATGGCAGATGCTTTGC…
FTT0579	FLH150080.01X	FtCD00020312	AY774743		hesB family protein	ATGGTAGTAGTTTTTGATCCAAATGCTAGTAGCATTTTAGAAGTTACAGATGCTGCAGCTAAACATTTCAAGAAACATCTAGACAAGCATGATGGTTGTATAGGTATTTATGTCGGAACTAAGGTTATGGGTTGTTCTGGCTTAGCTTATGATGTTGATTTTGTTAAACAGCAACCACAAGATACACAGAAAGTACAGCAGCATGGCATTAATTTCTTTGTATCTAATAAGTCTATGGATTTTCTTAATGGGCTAAAAATTGATTATGTTAAGCATGATTTTGGATTATATAAGTTAGAATATACAAATCCAAACGAATCAGCACGTTGTGGTTGTGGTGAAAGTTTTACAGTTTAG
FTT0580	FLH204578.01X	FtCD00022830	DQ681737		hypothetical protein	ATGAAACCAACAGATGTAACAATAATAAGAAGACAGGTAAAAGCAATTGCTGTACCATTTGGTAATGAGATTGAGTTAATGCCTGGTCAAGAAGTTTTAGTAACGCAAGATAAGGGTGGAAGCTTTACTTTAAATGTAAACGGTAATTTACTTCATCTAGATGGTAAAGATGCTGATGCGATAGGTAAGCAAATCGTCAGATATCCTGTAGAGGGGTATGATATTAAGCCAGGTGATCCAATTAATATGGATGCTATTTGGGATCAAATGAGAACAGTTTATGATCCTGAAATTCCTGTCAATATTGTTGATCTTGGTTTGATTTATAATATTATTACTAGAAAGTTAGAGAATGGTAATTTTCATGTAATAATTGATATGACATTAACAGCACCTGGT…
FTT0581	FLH150192.01X	FtCD00020325	AY774753	coaD	phosphopantetheine adenylyltransferase	ATGAATAAGATAGCAATTTATCCAGGTACTTTTGACCCAATTACCAATGGTCATGTTGATCTAGTAGAGCGTGCATTAAATATCTTTGATGAAATAGTTGTTGCAGTATCTACAGCTTATGGTAAAAATACTCTTTTTGATATTCGTATCAGAGAGCAAATGATAAAAGAAGTATTCAAAGATAATCAAAGGGTCAAAGTTGTAAGCTTTCAGGGTCTACTTGTTGATACAGCAGTCAAACATAATGCTTGTGCTATAGTTAGAGGTCTCAGAGCAGTATCTGATTTTGATTATGAATTTCAGATGTCAAGTATGAATAATAAATTAAACAGTGATATTCAAACTATATTCTTAACTCCGAGTGAGAAGTTTTCATGTATTTCCTCGACATTAGTTAGG…
FTT0582	FLH150008.01X	FtCD00020304	AY774701	fdx	Ferredoxin	ATGGCATTATTAATTACTGATGAATGTATTAATTGTGATATTTGTGAGCCTGAATGCCCTAATGAGGCAATATCACAAGGTGAAGAGTATTATGAGATTGATCCAAACAAATGTACAGAGTGTGTAGGGCATTTCGAGGAGTCTCAATGTACTAAGGTTTGCCCTATTAGGTGTATAATTATAGATCCAAATAATATAGAAACACATCAACAGCTTTTAGACAAGTATAATAGCTTAGTATCCTAG
FTT0583	FLH204575.01X	FtCD00022828	DQ681738	fopA	outer membrane associated protein	ATGATGAGATTAAAAAGTATTGTTATAGCTACAACTGTATTATTAGGTTCAGCTACAGCATCTATCGCTGCAGGTTCAGATAATATCGATACATTAGCAAACACTAATTCAGCTACTACACAAAGCAGTGGTTTTGCAGCTAATAATTTCATTGCTCCTTTTGCAAATACTTATAGCGCTTTGACTAACAAGGACAATACTTGGGGTCCTCAAGATAGAACTGGCCAGTGGTACTTAGGTGTAGATGCTAACGGTCTAGCTGGAACTCCTAACTCTCCATCAGGTGCTGGTGCTAACTTCACAATCGGTTATAACATCAATAAATACTTCGCTGTACAGTACAACCAATTAGTTGGTAGAGTATTTGCTGGTTTAGGTGAAGGTGTTGTAAACTTTAGT…
FTT0584	FLH230079.01X	FtCD00039289	DQ681739		hypothetical protein	ATGAATGTCAAAATATTACCAATAGCAATAGATTTAGATGTTAAAAATACTGGTGTCTTTAGCGCATTTTATCAAAAAGGAACTTCTCTTGAGAAATTGGATAATAAAAATGGCAAAGTATATGAACTATCAAAAGATTCTTATACTTTATTAATGAATAATAGAACAGCACGAAGACATAAAAGAAGAGGAATAGATAGAAAGCAGCTAGTCAAAAGGCTCTTTAAGCTTGTTTGGACAGAGCAACTAAATTTAGAGTGGGATAAAGACACTCAACAAGCGATTAGCTTTTTGTTTAATCGTAGAGGTTTTAGTTTTATTACTGATGGTTATTCGACTGAATATTTAAATATTGTTCCAGAGCAAGTAAAAGCGATACTTATGGATATATTTGATGAT…
FTT0586	FLH204580.01X	FtCD00022831	DQ681740		hypothetical protein	ATGAATATGGACATATTTGATAATGATTTATCTATTCCTGTTAATTTAATTAGACAATGGTGTTTTTGTCCGAGAATAGTTTATTATCAAGAACTTCTTGCGATTAAGCCGAACAAACCATTATGGGTTGCTCAAGGTGAAGAATTTCATAAAAAAGTAGAGCAACTTGAGAAAAGACGCAGCTTTAGCAGATATGGTTTAAATAATGCGATCAGGCATTTTAATCTAAGTATAAAAAGTCAGAAATATAAACTACATGGTATAGTTGACTGGGTTATAGAAACTGATACTAATGTATATGTGGTTGAGTATAAGACAAATCCTAATCCAAATAGCTTAGGGCATAAACTACAAATTGCAGCTTATGCTTTGCTAGTACAGGAATATTTTGCTAAACCA…
FTT0587c	FLH204612.01X	FtCD00022853	DQ681741	isftu2	Transposase	ATGAATTATCATATAAAAGAAGTATTCTGGTCAATTATTTTATCATTCTTAAAATCACAAAAAGGTATACATACCAATGATGAAGCCAAATTAAGATTGTTTATTGAAGCTGTATTTTATGTGTTACGTACAGGCTGTCAATGGAGAATGTTACCATTTTATTATGGTAAATATAGATCAATACATAAGCGTTTTAAAGATTGGTGTGATAAAGATATATTTTCTAGATTATTTAAATCAGTACAAAACCCTGATTTACAAGAAGTCATGCTTGATTCAACAATAGCAAGAGCACATGCTTGTGCTACGGGATATGATAAAGATGATAACCAAGCAATTGGTAGATCAGTTGGTAGGATAACCACTAAAATCCATGCTATGACTGATGCTTTAGGTAAT…
FTT0588	FLH204593.01X	FtCD00022843	DQ681742	aroA	3-phosphoshikimate 1-carboxyvinyltransferase	ATGAAAGATTTTATCCTTCAAATAAAATCACAGATAAAACAGCAAGTGTATTTAGATGGCTCAAAGAGTATCTCAAATAGATCACTGATAATCGCAGCGATGGCTCAAGGTCAAACAAAATTTGAGAATTTGCCTAATAGTGCTGATGTTTTAGCATGTATTGCAGCTCTAAAGGAGTTAGGTTGTCAGCTAGAACATAGCTGGGATTCAAAAACTTTAGTTATTCAAGGTTGTAGTGGAGTATTTGCGAACTTAGATGTCAAGATATTTTGTAATGAGTCTGGTACTTTAACAAGATTTATAATACCAATGTTAGCAGTGCAGTCTACAGGTAAATATTACGTATATGCCAAGCAAAGAATGATGGATAGACCCTTAGCAGATCAACTAAAACCGCTT…
FTT0589	FLH150260.01X	FtCD00020332	AY774740		hypothetical protein	ATGATAAAACAGGAGCGTATTATAACCAGATATCTAAGTCAAAGGTGGTATAAAAAAGCTCTTATCATCACAGCTACAGAGAGTAATTATTTTCATAATATAAATGTCTTAAAATTAGTCGCATGTTCAGGATATCTAAAGAATCAGTCACCATTGGGTTGTATTTTTGATATAGAGGCTTGGCCTTTTGAAAATAAATTTTTTGATCTTATTATCCTTGATGAGAGCTTTGTCAGCTGTCCAAAACAGATGAGGGCTCTATTTAATCAATTACATTTTTGTTTGTCAGATGATGGTGAGGTCATAGTGGCTTGTGTTGGTGGTATTAGTCTATATGGTTTGTTATCACGTTTTTTGGCAAACGGCTTTACTAGTAAAAAAGTTAGATTAATAAACTAT…
FTT0590	FLH204574.01X	FtCD00022827	DQ681743	rnhA	Ribonuclease H	ATGGTGGTTGCGCTAGGGAAATATATGGAAATTTTCAAAAAGAAAAATAGGGTCATTGCCTACACAGATGGTGCTTGTAAAGGCAATCCTGGAATTGGCGGCTGGGGAGCTATCCTTAGTTATAATGGTGTAGATAAAGAGATATATGGTAGTGAAAAAGATACTACAAATAATAGAATGGAGCTAATGGCCGCAATCAAAACGCTCCAAGCGCTTAAAAGAAAGTGTGATATAGCAATTTATACTGATTCTAAATATCTTCAAAATGGTATTAATGAATGGTTAGCAAATTGGAAAGCTAATGGTTGGAAAACAGCAGCCAAGAAAGAAGTCAAAAATAAAGATCTCTGGCAAGAGCTTGATAGTCTGACAAATAAGCATAATGTAACATGGGGCTGG…
FTT0591	FLH150092.01X	FtCD00020314	AY774751	ansA	L-asparaginase	ATGAAAGATCTTGAAAATCGTGCTAATAAAAAAATTTTAGTTCTATATACTGGTGGTACTATAGGTATGGTTAGTACTGAACAAGGCTATGATGTCAAACCTGGTTATCTTAGCGAGACAATTGCGGGTATTAGAGATTTTTATCATTATAATATGCCGCAATTTGAGATTAAAGAGTACAGTGAACTTATAGATTCATCAAATATTAATCCTAGAAAATGGCTTTCATTAGCTTTAGATATTATTAAAACTTATGAGGATTATGATGGCTTTGTAATTCTACATGGTACAGACACTCTTGCTTATACTGCTTCTGTATTATCATTTATGCTTGGTGAACTGCAAAAACCAGTAATTGTCACAGGATCACAAATTCCAATCTCAAAGATCAGATCAGAT…
FTT0592	FLH149972.01X	FtCD00020301	AY774738	cynT	carbonic anhydrase	ATGAGTGATATTTCTGAGTTGATAAAAGGCAATAGAGCATGGGCTGAAGAGATCAAAAAAACAAATCCAGGTTTTTTTGAAACTTTATCTAAAGGTCAGTCTCCAGAATACCTTTGGATAGGTTGTTCAGATAGTCGAGTACCTGCAAACCAAGTTTGTGGTTTGATTCCAGGTGAGGTTTTTGTCCATCGTAATGTTGCAAACGTTGTTTCACTTACAGATTTAAACTGTTTGTCAGTGTTACAGTTTGCTATTGAAGTCTTAAAGATTAAGAAAATAATAGTATGTGGTCACTATGCTTGTGGTGGTGTTGAGACTGTTGTCAAAGATAAGAGCTATGGTCTAATTGATAACTGGCTAACGTCTATCCATGAAGTTAAAGAGCAAAACAAACAGTTT…
FTT0593c	FLH204590.01X	FtCD00022840	DQ681744		hypothetical membrane protein	ATGAGCTCATTTATACTTATAAATATACTTTCTGATGTCTTGGCAATAATTTATGCTATCAGAAGTTCGAAATTTAGCAAAGATGCTTGGCTGTTCTATATTACAAGTATTATTATTGGTTCTAGTACATTTTTTCTTTATAATAACTTTTCAATTATTAACTATTTCTATAGTCTCGAAGCCGAGTATTATAATATTGCTATAGCCGTATTAGGATTAATTATTTCATTATGCTTAACAATTAAGACTAAAAGTATATCTGAATATAATAAAGTTTATATATCATTATTCTTATTAGTAATTATCTCTAGTTTTGTTTTATTAACAATATTTATAACCTCTGAAGACAATTTTACTAAAATAGAAATTACTTACTTTCTATTATTTGACATTCTTGGA…
FTT0594c	FLH150052.01X	FtCD00020309	AY774729		hypothetical protein	ATGCTATCCCTATTTCAAAAAATATCTTTTGAAAATAAAGATTTTATTGTAATGCGGGATGATCTAAGCCATCCTATCTTTTCTGGTAACAAAGCTAGAAAACTTGCCTATCTTTTAAACAATCCTGAAAAATATTCTCATATCCAAACAATTATATCTTTTGGTGGTAATCAATCTAACTTTATGTTGGCATTATCACAGCTAGCTGAGCTTAAAGGTTGGAATTTTCATTACTGGATAAAACCTCTACCTAAGTTTTTCAGGCAAACTAAAAATGGTAACTTAAAGCTAGCATTAGATAACGGTATGCAACTATTTGAAACTTTAAGCTCTCTAAATTTAGAAAAAATAAAAGCAAATTACCATACAGATAGTAGTCTCTATTTTTTTGATCAAGGC…
FTT0595c	FLH149977.01X	FtCD00020302	DQ681745	rubA	Rubredoxin	ATGGAATATAGAAAATACATTTGTATCGTTTGTGGCTTGATTTATGATGAAGCTGAAGGATGGCCAGAAGATGGTATCGAACCAGGTACCAGATGGGAAGATGTCCCGGAAGATTGGGAATGTCCTGACTGTGGTGTTAGTAAAGATGGATTTGAGCTTCTAGAAGAATAG
FTT0596c	FLH158134.01X	FtCD00021203	DQ681746		hypothetical protein	ATGGAATATCTCAAACTAGCAATAGTAGACTCTGAAAACTACAACAATTTTGCACATATATCTGCAGGTAATTTCGATAGAGTAATAGTTTTTACCAATAGCCAAGAGCTAGAGTCTAACTTTAACAAAACTGAAATATATCATAACTTTGAACTAGTTCCAATTATCTATGGTGAAGGTAATAAAGATAATATGGATGGCTACATTTGTGCCAAAGTTGGTGAATATGTCGAACGCTATCGTGATTTTCGTACTTACCTTAGTATTACGATATTTAGTAACGATAGAATTTTTAGGGGAATAGCCTCATACTATACCCGCAAAGGATTCAATATAGCAACTACTGCTCCTACACAATGTGACACAGGTACCAGCAATACCGATCCCAAAATACGCATT…
FTT0597	FLH158072.01X	FtCD00021192	AY774507		hypothetical protein	ATGGTTGATTTTCAATACACTTATAGTCAGTTATCAGAGCAATTCTACTCACGCCAAGCAGTATACAAATATCCTAATGCAAAATTACTAATTTTAAATGATTGTTTAGTTACTGAATTAGGTCTGGATTTAGCCAATAAATCAGAACAGCAATTATTAGAGTTTCTTTTGGGCTATAGCAGTAAAAAACCAATCTCACAAGCTTATGCTGGACATCAGTTTGGTAATTTTACAATGTTAGGTGATGGACGTGCTATATTAATTGGCGAATATAAAAAGCCAAATGGGGAGTTAGTTGATTTTCATTTAAAAGGAGCGGGCTTAACAAAGTTTTCACGTGGTGGAGATGGTAAAGCAGCTTTAGCGCCAATGCTCAGAGAATATATAGTTAGTGAAGCT…
FTT0598c	FLH231445.01X	FtCD00039355	DQ681747		Sodium-dicarboxylate symporter family protein	ATGCGTATGGCAATTTTACTTATAATTTCTTTACTAATTTTAGTATATCTTCACCTAAAAAAAATTAGCTTTAATTTCCGGACTATACTCGCATTAATAATCGGTGTTGTTATTGGGATTATCTACAATTCTACTGATTATTATAGCAATAGCTTCATACAAATTAGCAATATATTGGGTGATGGCTATATTTCTTTACTTAAGATGTTGATTATTCCAATTGTATTAACATCAATAATTCACTCAATAATTAACCTAAAAAACTATGAGGGCTCTTATGTTATAAGATTTGCCTATAAAACTATAGCAATACTTTTAATCTTAACTGGTATAAGTGCTGCAATAGGCGCTAGTGTTGCTATTATTATGCATTTAGGACAGGGCATAGATATCGCATCT…
FTT0599	FLH157971.01X	FtCD00021175	AY774496		SIS domain protein	ATGTCAACGCTTATGCACCAGGAGGCAAGTAGCAGTTTTGCTAAAGTCGCCAACCAGCTAAAATTAAACAAAGATATTACTAAATCAATAGTAAAAATCCTCAAAGAAAAAAATATTAAAAGAATTATTACTATAGCAAGGGGAAGTTCAGACTGTGTCGCAAATTTTGCAAAATATTTATTTGAAACTCAGCTTGGTTTCAATGTTTCATCACTACCGCCATCTATAACAACGATATATGGTAAAAATATTGGTGATAAAGAAACACTGGCGATAGCTATCTCACAATCTGGTGGTAGTCCAGATTTACGCTTAGCTTTAGAAGGTTGTAAGAAAGCAGGATGTACTACACTAGCAATAGTCAATGTAGAAAAATCTCCTTTAGCTGAAAGTGCGGAT…
FTT0601	FLH204540.01X	FtCD00022808	DQ681748		hypothetical protein	ATGAAATCATGTGGTTATAACTTTGTACTTTCTGATGGTCGAATAAAGCCAGAGACAGCGATAAAACTAGCATTAACAGTAATAATGTATTCTCTAGGTAAATATTCTATGGTTTTATAG
FTT0602c	FLH204619.01X	FtCD00022855	DQ681749		hypothetical protein	ATGTATTTTTTATATATAATTATGAAGTATATTTACAAAAAATTATTAATATATAGTTTTTTTATGTGTTCAATTTGTCACTCATATGCGGAGCTTAATAATCAAATCTCCATTTTAGAATTACAGAAACAAATTAAAGAATTACAAACCGAGATTAATCACTTTGAAGAAACAAAAATAAATGAAAACTTTGAATTCACAACTTATAGTAGTGAAGTTGTAGATAGTAAATCTAAATTGAGAAATAAAGAAACTAAAGTATTATATACAGTTCAAAACAATAATGTTGACATAATCCAAAATATTAGTCCTGAAAGCACAATTATTGATCTTAGAGGAAAACCCTTAGGTAAAATATTCAATCAAAATGGTAGTATTGATGTTGGAAATGCTCCGGCT…
FTT0603	FLH157867.01X	FtCD00021162	AY774154		hypothetical protein	ATGGCATTTCCTAAAATGACTAGTTTGGCTGAAGCATCATGGGTAGATCCGAATATTACTGTCAAAGATAAAAAAATAAACTGGAATAGTTTAGTGTATAGACTAGCAACTGATAACACTAAATTTTTGGGATATATCGATAGAATTATTAACCCAAATAGTGATGAAAAGAAAGACTAG
FTT0604	FLH204564.01X	FtCD00039249	DQ681750		conserved hypothetical membrane protein	ATGAAGTTCTTAAATCTAACAAAAATATGCCAGAAAAGATTAAAAATATTACTCGAAGGAGAGTCATTATTTAATGATGTAGTTTCGATTGTTCTATTTACAATGTTCGTTGGAATTATTGATGGAAATTCTCAAGATGTCTCAATATTTAGTATTTCAGAATTGTTACTAAGAGAGGGACTTGGAGGTATATTATTAGGCTCAGTAATAGGCTACGCTAGCTCGTTTTTGATGAAAAGTCTTGATGATAGTAATGCTTTGGTTTTAGTATCACTAGCTGTAGTGAGTTTTGATTTTTCAATAGCTCATATTCTTGTTGTATCAGCTCCATTAGTAATGGTTGTAGCAGGATTAATTATCAGTAATGGTAGTCTTGAATCAAGACTATCAGATAAATCA…
FTT0605c	FLH204546.01X	FtCD00022811	DQ681751		hypothetical protein	ATGGTTTTAAATTCTTTCTTTGCTTATAACAAAAATTCCATATATCTTTTAAAAGATATCCCTTTAATAAATATTGAAGTTATCACATATACATATATGACTAAAAATATAAACATACTTGAACTATCCTCAGGTAAAGATAATGCAATTGACACACCTCCTCTTAAACCTGCCCATGTCATAACATAG
FTT0607	FLH154082.01X	FtCD00020715	DQ681752	ispG	1-hydroxy-2-methyl-2-(E)-butenyl 4-diphosphate synthase	ATGGGTTCTTATTTGAATAAAACAAGTGTTGTAAAAGTTGGAAATGTTTTGATAGGTGGTGATAATCCAGTTGTTGTTCAGTCAATGACAGATACATATACTGCAGATGTTGAAAAGACAGTTAAGCAAATCTTAGCACTTCATAAAGCAGGTAGTGAAATTGTTAGAATTACAGTTAATGATGAGTCAGCTGCTGCTGCTGTACCTGAGATTGTTAAAGAGCTAGCAAAGCATGATTGTCATGTGCCTTTGGTTGGTGATTTTCATTATAATGGTCATACATTACTTAGTAAATATCCAGAATGTGCGAAGGCTTTGGCAAAATATCGTATAAATCCTGGTAATGTTGGTTTTGGTAAGAAAAAAGATACTCAGTTTGCAGAGATTATAAAAATTGCA…
FTT0608	FLH154161.01X	FtCD00020727	AY774606		hypothetical protein	ATGTCAGTAGTTTTTGTTAATACTCCCTTTGCCAAACTTAAATTAGGTTATACAAATAATACCCAAGGCTTTAGTAAAGAAAAATATGCTAAATTTAATCTAGCTGACAATGTCGGTGATAAATGTTTAGCTGTAGAAAAAAATCGAAATTTATTTAAATCATACCTTAATGCGGATATAAAGTGGTTAAGACAAAACCATACTAATATTGTCAAAAGTTTTGATGAGTATAATGGTGATTTTTGTGATGCTATCATCACTGATAAACCTAGACAAGCATGTGTGGTTTTAACAGCAGATTGTTTGCCTATTATCCTATTTGATAAGAAAATGACAAAAGTTGCTGCAATCCATGCAGGTTGGCGAGGGTTATCACAAGGGATATTAGAAGTAGCTCTC…
FTT0609	FLH204631.01X	FtCD00022860	DQ681753		Peptidase, M24 family protein	ATGTCTGAGAAATTACAAATCTTAAGAAGTTTAATGCAAGAAAAAGATTATGATTTTTATATAGTGCCTTCTGTTGATGATCATAACAACGAATATGTCCCTAAGTGTTGGCAATACCGTGCTTGGATAAGTGGCTTCGATGGTTCAGCCGGAGATGTGCTAGTAGGTATGGATAAAGCATATCTTTCTACTGATGGTAGGTATTTTCTCCAAGCTGAACAACAGTTAGACAAAAATGATTTCGAACTAATAAAGCAGTCAAGTTTTGCACCTGAAATAGTCAAATGGCTGTGGAAAAATGCTAAGGGAAAAACTATCGCGGTAGACCCAGCTAAACTTAGTTACAAAAGTACTTTAGAGTTGTTGGATTATCTTAATAGTAATGATTACAATGTTGTT…
FTT0624	FLH204588.01X	FtCD00039251	DQ681754	clpP	ATP-dependent Clp protease subunit P	ATGATAACTAATAATCTAGTTCCTACCGTAATTGAAAAAACAGCTGGCGGTGAGAGAGCCTTTGATATTTATTCAAGACTACTTAAAGAGCGTATAGTTTTTTTGAATGGTGAGGTAAATGATCACTCAGCTAATCTTGTGATTGCGCAACTATTGTTTCTAGAGTCAGAAGACCCAGATAAAGATATTTATTTTTATATAAATTCTCCTGGTGGGATGGTTACAGCTGGCATGGGTGTTTATGATACTATGCAGTTTATCAAACCTGATGTAAGTACTATATGTATTGGTTTGGCTGCGAGTATGGGATCACTTTTGTTAGCAGGTGGTGCTAAAGGTAAAAGATATAGTCTACCAAGCTCGCAAATTATGATTCATCAGCCTTTAGGTGGCTTTAGA…
FTT0625	FLH157678.01X	FtCD00021141	DQ681755	clpX	ATP-dependent Clp protease subunit X	GTGGCTAAAATTCTATATTGTTCTTTTTGTGGTAAATCACAACAAGAAGTCAAAAATATTATCTCAGGAAGAGATGGTAATATTTGTAACGAATGTGTAAGTAAATGTGCCGAAAAAATTCGTAGTACTGGTAGTACTAGTGCTGAAGATATCTCATTTGAAAAATTACCAAAGCCAGTTGAAATCAAAAAATACTTAGATGATTATATTATCGGTCAAGATAATGCTAAAAAAGTGTTATCAGTAGCTGTATACAATCATTATAAAAGAATTACATCTAACCTAACAAAAGATGATGATACTGAGCTTAAAAAAAGTAACGTGCTGTTAATTGGTCCAACGGGATCAGGTAAGACATTATTTGCCCAGACTTTAGCAAAGTTGTTAAATGTTCCTTTT…
FTT0626	FLH230096.01X	FtCD00039293	DQ681756	lon	DNA-binding, ATP-dependent protease La	ATGTCAGAATCCCTAAATGTCGTTCCTGTTATTCCTTTAAGAGATGTTGTTATTTATCCATCGATGACTCTACCACTTAATGTTGGGCGTAAAAAGTCAATAGAGGCAGTTAAACAGGCATCAAATAATTATAATAACTATATTTTATTAGCTACACAAAAAAATGGTTCGAGTGGCGGTGATGTTGTAGAAAATATATATGATATTGCAACTCTTGCTAAAGTTGTTCAGATAATGAAACTTCCTGATGGTAGTCTGAAAATAATAGTCGAGGGTATTGCTAAAAGACTAGTAGCTAAGTATGAAGATATTGATGGTTGTATCTATGCAAATTTAGATAGTTTACATATTGATGATAACTATGATCCCAGCCAAGTTGATAAAGAACTAAAAGCTATT…
FTT0627	FLH153957.01X	FtCD00020701	DQ681757	hupB	Histone-like protein HU form B	ATGAACAAGAGTGAATTAGTAAGTGCTATAGCTAAAGAAGCAGATGTTACTAAAGAAGTTGCTAGCAACACTCTAGATGCTACTATTGCGGCAGTAACTAAAGCTTTAAAAAATGGTGATAGCGTAACTCTAGTAGGTTTTGGTACTTTTCAGGTAAAAGAAAGAAGTCCTAGAGAGGGTAGAAACCCAAAGACTGGTGAAACTATTAAGATCCCTGCTTCTAAAGTTCCTAGCTTTAAAGCTAGTAAGGGTCTTAAAGACGCTGTAAAATAG
FTT0628	FLH154189.01X	FtCD00020732	AY774623		hypothetical protein	ATGTTACAGTCTTTTAATGATAGACTCAAAGGTCCTTTTACATGGATTGTGGTTATCTCGATAAGCTTTATTTTTGTAATTTCTGGAATGACATTCTTTTTTACAAATATTGGTAGTAGAGCATATGTTGCTAAAGTTGGTGATAATGAAATAAGCTCACAACAATTCCAACAATATGCTCAAAGTGCTACTACAGAAGAACAAAAGAGAGCTATTTTATCTCAAATGATAGATCAGTATTTGATATTAGCCGATGCACAACGCCATGATATTGTAGTGTCAAAACTAGCGCTACAATCAGCAATATTTACTAACCCAATGTTCTTTGATAAAGATGGAAAGTTTTCTGCTGAAAAGCTAAAACAGGTTGTAGCTTATTTAGGTGGAATGGATAAACTT…
FTT0629	FLH204551.01X	FtCD00022814	DQ681758	miaA	tRNA delta(2)-isopentenylpyrophosphate transferase	ATGAGCAAATTAATCTATGGTTTGGCTGGACCAACAGCTTCTGGTAAAACTTCATTATCAATATTGTTAGCTAAAAAAATTAATGCAGAAATTATTAGTGTTGACTCATCTCTTGTTTATAAAGGTATGGATATTGGTACAGCCAAGCCAACTTTACAAGAGCAAGATGGTATTAAGCATCATCTTATAGATATTATTGAGCCAACAGGGAATTTTTCGGTTGCTGACTTTATATCCAGTGTTAATAAACTCAAAAAAGAAATTTGGGCTAGAGGAAGAGAAGTCTTACTTGTTGGTGGGACAATGCTCTATTTTAAAGGTTTGATAGAGGGTTTATCTGCGTTACCAGAATCTCAAGCCGAGATTAGAGAAGCACTAGAATACCAGAAAAAAGCTAAA…
FTT0630	FLH153996.01X	FtCD00020707	AY774616	hfq	host factor I for bacteriophage Q beta replication	ATGTCAAGAGTATCATCTTTACAAGACCCGTTCTTAAATGCTTTAAGAAAAGAAAAAGTTAGCGTATCTGTATATCTAGTAAACGGGATCAAACTACAAGGTCAAGTAGAAGCTTTTGACCAATTCTGTATCGTACTTAGAAATACTGTTAATCAAATGGTTTATAAACATGCTATTTCTACTATAGTTCCAGCTAAAAGTGTAAGAATGATTTATAACTCTTTTAATCCATATCACCAAAATTCTAATGATGAGCAAGATGAGAATGTAGATGATATTCATTCTGATGATCTTGAAATTCAAGAGAATGAAGGTAAAATTCACGAGTAG
FTT0631	FLH154117.01X	FtCD00020722	AY774637	hflX	protease, GTP-binding subunit	ATGGAATTTTTCCAATCGTATCAAGCAGGTAGTAAGTGCCTGCTTGTAAATATAAATTTCAAATATCATCGTGAACTTAATGCTGATTTAACAGAGTTGGAAGGCTTAGTTATAGCAGCAGAAAAAGTTGTATTGCAAAGTTTAGACTTTAACCATCCTGAGCCAGATATCAAATACTTTTGCGGTATGGGTAAAATCGAAATGATTAAAAATAAACGCGATGAACTAGAAGCAGATTTAGTTGTTTTTAACCACCCTTTAACTCCCTCTCAAGAACGTAATATTGAGAAATTTCTTGAGTGCAGAGTTATGGATAGAACTAGATTAATTCTAGAGATATTTTCATTACGTGCTAAAACTTATGAGGGTAAACTTCAGGTTGAGTTAGCACAGCTTAAC…
FTT0632c	FLH204581.01X	FtCD00022832	DQ681759		monooxygenase family protein	ATGGAAGTAAAAAATGAAAAAATTGCAATCAATGGTACAGGAATATCGGGCTTAACTTTAGCGTGGTGGTTAAGAAAGTATGGTTTTGAGCCAACACTTTTCGAAAAAGCTTCGGAGCTTAGAAATGGTGGTTATCTTGTTGATTTTTGGGGTCCTGCTTGTGAAATAATGAAAAAAATGGGGCTTTTTGATCAGCTAAAAGAAAAATCATATCAAATCAAAAATATTCACTGTTTTGATGAAAATGGCAGAAGATCATCGAAGGTTAATATTTCTTCTTTAATCACTGATAATTATGACGAATTCCTAAGTGTCAAACGAGGAGATATAGCTGAGACAATATATAAGGCTTGTCAAGGCATAGATATTAGATTTGCCACATCGATAGACAAGATAGAA…
FTT0633	FLH154032.01X	FtCD00020711	AY774642	hflK	SPFH domain, band 7 family protein	ATGATTAAAAAACTAAAACAAAAATGGTTTTGGAGTAAAAATTCGGAGCAGGGCCCACCGGATTTAGAAGAAATGATTAAAAGATTCTTTGGCAAAAAGAATAAAACTGATAATGATGATAATGAGAGTATATATTCAAAAAATGCTAACAAAAAACAATCAACATTCAATAAGCCACCGATTGCTAAAATAGTTACAATAATAGTAGCTTTGCTTATAGTTGCATGGGTTGGTTTTGGTTTTTATGTTGTGCAGCCAGCTGAGCAAGCTATAGTACTTAGATTAGGTAAGTTTTCTAAATTAGTGGAGCCTGGTCTACATTGGCATCCATTGGGTGTTGATAAGGTTTATAAAGAAAATGTCCAAGAGTTGAAAACCATTTCTCTAAAGCGTGATATG…
FTT0634	FLH153984.01X	FtCD00020704	AY774611	hflC	SPFH domain, band 7 family protein	ATGAGTAAATTCCTAAAAATATTCTTAGTGCTTGTAGTAGTCTTAGCTATAGTAGTATTAAGCACAAAATTTATTGTCAAACAAGGCTCAGAAGCAGTTATTCTAAGACTTGGTGAACTTGTAAAAGATAAAGATGGCAAAGCTGTAGAGTATGAACCAGGTTTACATATTAAAATCCCATTTATAGATACAGTTAAAATGTACGATATGCGTAACCGAGTTTTAGAGGCTGATTCTGCTCGTGTAGTTACTAAAGAGCAAAAAGATGTACTGATTAATGCCTATGTGGTTTGGAAGATAAGTAATAACAATATTTCTACATTTTACACAAGTACTAGTGGTAGTGTTGATCGAGCTGAGACATTATTAAAACAATTCTTGGAGTCTTCTTTAAGAGCA…
FTT0635	FLH154105.01X	FtCD00020720	AY774626	wzb	low molecular weight (LMW) phosphotyrosine protein phosphatase	ATGAGTATTGTAAAAGTACTTTTTGTATGTAAAGGTAATATTTGTCGGTCGCCTACTGCACATGGTATTTTCCGTGATATTGTTAAGCAGTATAACTTAGAAAGTCATATTGATGTGGCATCCTGTGGTACAAGCTCACGGATGTGGGGACATGAAGGGCACGGAGCTGATATGCGTACATTAGAAATGGCAAAGAAATATGATTGTGATCTTTCAGATCAAGTTTCACAGCAGTTAGAGGAGGCGGCTTTTGACGAATATGATTATATCGTCGCAATGGATCAAGAGAATATTGATACAATGAAAGAGATGTTTCCAAATGCTGATTTTTCAAAAGTCTCAAGAATGTTGGAATATGCTCCTGCTATTGCTTTGGATGATGTGCCAGATCCATATTTT…
FTT0636	FLH157794.01X	FtCD00021155	AY774464	engB	ATP/GTP-binding protein	ATGAGTTATAGTAAAGCAAAATATATAATGGGTGCGGCAAAGGTTTCACAGCTTCCAGAAGATACTGGTGTGGAAGTTGCTTTTGCAGGACGTTCAAATGCTGGTAAATCAAGCGCATTAAATACTCTTACAGATCAAAAGGGTCTTGCTAGGGTAAGTAAAACACCTGGAAGAACACAACTTATTAACTTATTTGATTTAGGTAATAATAATAGATTGGTAGATTTGCCTGGCTATGGTTATGCAAAAGTTTCAGAAAGTATTAAGCGTCAATGGCAGAGTGAGATGGAGAACTATTTGACATCACGTAAATGCTTAAATGGTATAGTACTTTTAGTAGATTTACGTCATGAGTTAAAAGAATTTGATTCTCTAATGATAGAGATGGCGATATCTTTT…
FTT0838	FLH155169.01X	FtCD00020840	AY774413	tolR	TolR protein	ATGCTTATGAAAAAACGAAATAAAAGATTTTTTAGAAAACAGCGACCTATGGTACAAATCAATGTAGTGCCTTACATTGACGTTATGCTTGTTCTACTAGTAATTTTTATGATCACAACACCGATCTTAACTCAGGGTGTAAAAGTTGATCTACCGAAAGCACAATCTGAAAAGATACCTTCAAATGATAGTAAACCAATAGTTGTTACGGTAAATAAGCAAGGTGAGTATTTTATTAATCAAGGAGTTAATGATCCTAAGACAGCTTTAAGTTCAGGTGCATTAGCAAATGCTGTGGTGAGTTTATCACAGCAAAATCCTGGTAAGCCTGTTTATGTAAGGGGTGATAGTAGCGCAAGTTATGGTGAAGTTGTAAAAGCTATGGCTCTTATTCAAAAA…
FTT0839	FLH204452.01X	FtCD00022758	DQ681760		hypothetical membrane protein	ATGGCAAATCTTAATTATCATAAATTTTTACGCTTTTGTAATAAGCAAATAGATGAGAACCCATTTTTAGTTAAGGCTATATTAATCCATATTGCTTTGATAATTCTGCTATATATTTTGTCTTTTGTTAGCAGTCTAAAGTTTGAAAAAACACAGGCATCTTTGACTGCACAAGTTTCAAATATGCCAAAGAAATTTGAGATTATCCAAGCCACTTCAATAAGTAGTAGCGAATTAAATAAACAAATATCTGCTTACGAAAATCATCAACAAGAGTTAAAACAGGCTAAAGAAGATATTAAACAAGCTAAGTTACAAGCTCTTAGAAAACATCAGCAACAATTAAAAGAGAAGGCTGAGGCAGAAAAAAAAGCTAAACAACAAGCTATCTTAGAGGCT…
FTT0840	FLH204509.01X	FtCD00022792	DQ681761	tolB	TolB protein precursor	ATGAGGAATGGTATGAGGAAAATCATTGCAGGCGTTTTTATATTTGTTTTTTTGATCTCTAATCTATATGCAGACTTGGTTGCAGAGGTGACTACTGGAGTAATTCAAAAGCCGTTAGTTACGGTTGTTAGTGATAATGTTGTTGATCAGTTTCCGCAGCAGGTAAATTCTGTAATAGTTGCAGACTTAAACCATAATGCTAAATTACAAGCTAATGATACAATTAAATATGAAATTAAGCAAAAGCAAAATATTCCTTGGAAGAGCCTAAAATCTGACTATGTTGTATTAACAAAATATACGAATAACTCATATAATAATTATACTGTAGAAGTGCAGATTCTAAAGAGAAATGACACAAGTTATTTACAAGCGATTACTTATAAAAATATAAATGTT…
FTT0841	FLH204457.01X	FtCD00039242	DQ681762		hypothetical lipoprotein	ATGAGTATGCAAGTTGCTATTAAAATATATTTGATTGGTTTTTTCGCTTTGTTAGTTACAAGCTGTGCATGGTATAAAGGACCTAGTTTAATGCCTAATGCAAACGGTAGTTTAGATGGCTCTTCCCTAAATGAAAGTAGTGGTCCAGGCTTTATAAGTACACTTAAATCAGCCGATAATTATGGCGCAAGTGATACAGGGTTTGCTGATGGTGGTGGTAATTATGTTGTTTCAAGTTTTGATAATGATTAG
FTT0842	FLH151729.01X	FtCD00020506	DQ681763		Peptidoglycan-associated lipoprotein	ATGATGAAAAAAAGGATAATCAACTTAGCAGTTATAGGTTCTATGCTTATGTTGGCAAGTTGCTCTAGTACTAGACCAGATAATAGTGATTTAATCAAAGATAAATATGCTGGAGTAGATAGCTCACAAGCTTTAGAGATGTCTTCGCAGATTTATGGTTCTGATAAGCTAAGCTCAGATCAAGTTGAGCAAATGAAAAAAGAACTTATGAATATTAATTGTAGATCAGTATATTTTGGTTTTGATAGCTATAATATTACTGATGACGCTAAAGAATGCCTTGATAAAACGGCAGACTATTTAATAGCTCATCCAGATCAACCAATTAAATTATCTGGTAATACTGACCCAAGAGGTAGTGAGAAGTATAACTTTAACCTTGGTCAAAAACGTGCTGAA…
FTT0845	FLH204462.01X	FtCD00022765	DQ681765		hypothetical protein	ATGGCAATGAGATTATTCCATAGCCGGAATTTTAGAGGTATTTTTATGAATGATAAGAGTATAACAACTAGTGAAGTTATAGAAATGGCGTGGTGTGATAAGACATCATTTGATGCAATCAAAGAAATAACCGGATTATCAGAGCCACAAGTTATAAAGATTATGCGCAACAATCTTAAGCCGAGTAGTTTTAAGCTTTGGCGTAAAAGAGTAACAGGAAGAGTTGCAAAACATCAAAAAAGGTTAAATCATATAAATGCAGATAGTTTGGTTTAG
FTT0846	FLH231421.01X	FtCD00039344	DQ681766		deoxyribodipyrimidine photolyase	ATGCAGATAGTTTGGTTTAAGCGAGACTTACGCGTAACTGATAACTTAGCTTTATCATTAGCCTCTGAAAAAGGAGATATTTTACCACTATACATAATTGAACCTGAACTTTGGCAACAGCCTGATATGAGTCATAGGCAATATTTGTTTTTATCAGAGTGTCTAGAAGAGCTAAATACTGAGCTTACAAAATTGGGTCAATCTTTAGCTATAATGCTAGGGGATGCTGTAGAGATTTTTGAGCAGCTAATACAAAAATATAATATAAAGAATGTTTGGTCGCATCAAGAAACTTGGAATGACTGGACATATCAGCGAGATATTAAACTTGAGAAATTTTTTAAACAGAATAATATTGTATGGCATCAACCATATCAAAATGGTGTAGTTCGTTGTTTA…
FTT0847	FLH204527.01X	FtCD00022802	DQ681767		hypothetical protein	ATGAGAGATTGTGATAAAGCAAATGATGTTGTGATGATGTGTGAAGTGATGAAAGAGGCTAGCTATGTTAAGCATCATAAAAAGAAGCTTGTATATATTTTCTCAGCAATGCGCCATTTTGCACTACAGTTACATAAATTAGGTTATAAAGTTTGCTATACAAAACTAGATGATCCAAAAAATACCGGTTCATTTTATTCAGAAATACAGCGAGTTGTTGAAAAGCTTTGCATACAAAAGCTTATTGTTACTGAACCGGGTGAATATCGTGTATTAAAAGATATCCAAAGCTGGCAAAAAGATTTTTCAATTGATGTTGAAATACGCATAGATGATAGATTTTTAGCAACAATTGGTGAATTTACAAACTGGGCAAAAGGCTATAAGCAACTACGAATG…
FTT0848	FLH204451.01X	FtCD00022757	DQ681768		hypothetical protein	ATGAAAAAACATCGTCTCCCGACAAAGATTTGTGTAGTATGTGGCTTACCATTTACTTGGCGTAAGAAGTGGGCAAAAGTATGGGATGAGGTAAAATACTGTTCTGAAAGATGTCGTAGATCAAAAAATAAAAAGTAG
FTT0849	FLH204454.01X	FtCD00022760	DQ681769		bile acid symporter family protein	ATGATGAAAATGAACTTTATCCAAAAATATTTTGCGATTATAGTGATAGCGGGAGTTATTTTAGCAATCTCAATACCTTCTATATTTATACCATTAAAGCCTTATATTACTTATTTATTGGCTGCTATTATGTTGATTATAGGGCTGCATTTGCAAGCAAAAGACTTTGTGAAGGTGGCTAACCTCAAGGGAAAGCTACTAGTTATATTGTTTTTGAAATTAACTGTTACATCAATAGCTGCTTTTATAATTGGTAAGCTCTTTGGTTTGAGCTTAACCGCATTGATAGGTTTAGTTATTGTTGGCGCTTGTCCAGGAGGCACGGCTTCTGGAGTGATGGCTTTACTAGCTAGAGCAAATATATCATTAGTTGTCAGTTTAACTTTTTTGACTACTCTA…
FTT0850	FLH154552.01X	FtCD00020766	AY774010		hypothetical protein	ATGGTTTTAGATATCAAAATGAAGCCGGAATTAAAAACATTTATAAATGTCGCCAAGGCTATAAGTAAGCTTTTACATCCTTTTGCAGAAGTAGTAATTCATGATTTATCTAAGAATAAAATAGTAGCAATTTTTAATCCTATCTCTAAAAGAGAAATTGGTGATATATCATATTTAGATCATATAGATTTAGATGCGTACGATGATTTTGTAATAGGGCCTTATGACAAAATAAATTATGATGGTCGTAAAATGAAATGTATCATTACAGTAATCAAAGATTCAATAGACAATCTTATTGGTACACTATGTATAAACTTAGATGTTTCAGTGTTTGATAGATATCAAAATTTGATAAATGCATTTCTAAACAATAATGATATGCAAATCTCGCAACAG…
FTT0851	FLH154334.01X	FtCD00020747	DQ681770		conserved hypothetical membrane protein	ATGCTAATTATATTTGGAGCAATAGTTGGTTTTGTAGCCAGTTTTATGTCAACATTACTTGGTGGTGGAGCAGGTTTGATAGCAGTTCCAGCATTTTATTTTATAATAGTACATACTTATGGGCCAAACTTTGCGATGCAAATAGCGCTTGCGACATGTTGTGGAATGTCGATTTTTTTAGGTTCAATAGCCACATTCAAACATTATAAAAAGGGCAATATTGATTTAGGCGAGCTAAAATACTATTTATTGTATCTATCAATAGGAGCTTTGATAGGTTCAATAATAGTCAAATATATAAATACCGAACTATTAAAAATGGTCTTTGCAATATTATTGTTTGGTAGTGGTATTTGGATGATACTATATAATGATAATAAAGTCATAAAACTGCCAAGA…
FTT1659	FLH204150.01X	FtCD00022607	DQ681771		hypothetical protein	ATGCAAATGAGAAAAAAAACTGAACAAATAAGAATACAAATCTTAAAAGAGGTTAATTATCATTCCTTAGATTTAGTAAACCATATATCTTCAATGTTTAATATTAGTCGACAATCTGTATATCGACATATAAATAATTTAATAAAAGAACAAAAATTAAGTTTTGATATTATAGATGGCAAGAGAGTTTATAAATATGGAAAAGTAAGAGAGCTAAGTAAGCTTATAACAATCAATAAAGATGTTAGTGAAAGTGATATTTATGCTAATTATTTTATTTGGGTTGAGCAAGATTTAAAAGAAAATGTCAAAGCAATAGTTGAATATGGATTCACAGAGATTTTAAATAACGTAATAGATCACTCAGAATCTAAAACTTGTTTTGTTTATGTTAAAAGA…
FTT1660c	FLH154556.01X	FtCD00020767	DQ681772	pyrC	Dihydroorotase	ATGTCAAATCAAAGTTTACTTATCAAAAATGCTACGGTCGTAAATGAGGGCAAAACATTTAAATCAGATGTTCTGGTAGAGAATGGTAGAATTGCCAAAGTTGCTGCAAATATAGACAAATCAGCAGATAAAATCTTAGATGCTACAGGGTTTCATCTACTACCAGGTATGATTGATGATCAGGTGCATTTTAGAGAGCCTGGGCTTATGCACAAAGGTGATATCGAGTCAGAATCTCGTGCTGCTGTAATGGGCGGTATCACATCATATATGGAGATGCCAAATGTAAATCCAGCTACTACAGTAGTTGAGCGACTAGATGAGAAAAAAGAGCGTGCAGCTACTAGATCTCATGCAAACTATGCTTTTTATCTTGGTGCGACTAATGATAATGTTGAG…
FTT1661	FLH204193.01X	FtCD00022638	DQ681773	tmpT	Thiopurine S-methyltransferase	ATGAATAAGCTTGAAACTAATAATAATCAATATTGGCTAGATAGATGGCAAAATGATGATGTAGGTTTTTGTCAAGAATCACCAAATGAGTTTCTAGTTAAGCATTTTTCTAAACTAAACATAAATGATTCATCGGTATGCTTAATACCAATGTGTGGCTGTAGTATAGATATGTTATTTTTCTTATCTAAGGGGGTTAAAGTAATTGGTATTGAGCTATCAGAAAAAGCTGTCTTATCATTTTTTAGCCAAAATACTATCAATTATGAAGTTATACATGGCAATGACTATAAACTCTATAAAGGCGATGATATTGAGATATATGTAGCAGATATTTTTAACTTACCAAAGATAGCAAACAATTTACCAGTATTTGATATTTGGTATGATAGAGGTGCT…
FTT1663	FLH231335.01X	FtCD00039305	DQ681774	carA	Carbamoyl-phosphate synthase small chain	ATGATATTAGCTAACGATATGACTAATGCGATATTGGTTTTCCCAGATGGTACATACTATCTAGGTAGATCAATAGGGGTTCGTGGTTGGACAGACGGCGAAATTTGTTTCAATACATCAATGACAGGTTACCAAGAGACTCTAACAGATCCATCTTATGCTGGTCAGATTATAACTTTTACATTCCCACACATAGGTAATGTCGGTATCAATAATGAGGATAATGAATCACTTGGTGTATTTGCTAAAGGTCTAATCGTACGTGAGAACCTTACAAACCCATCAAATTTTAGAGCTAAAAAGCATATAGATACATGGCTAAAAAATAGAAATATAGTCGGTATCTGTGGTGTTGATACGCGTGCAATCGTACGTAAAGTGCGTAAAGAAGGCGCGGTA…
FTT1664	FLH230071.01X	FtCD00039287	DQ681775	carB	Carbamoyl-phosphate synthase large chain	ATGCCAAAAAGAACAGATATAAAAAGTATTTTAGTTTTAGGTGCTGGTCCAATAGTTATCGGTCAAGCATGTGAGTTTGACTACTCAGGAACTCAAGCATGTAAGGTTTTAAAAGAAGACGGCTACACGGTCTTTCTAGTAAACTCAAACCCTGCAACAATCATGACAGATCCAACAACCACAGATAAAATCTTTATCGAGCCAATTACGGTTGAGAGTGTTGGTAAAATTATCGCTAGAGAAAGACCAGATGCAATCTTACCTACAGTAGGTGGACAAACTGCGCTTAACTGTGCTTTAGCATTAGACAAAGCTGGTATTTTAGAAAAATATAATGTCGAAATGCTTGGTGCAAAAGCTGACTCTATTGATAAGGCAGAAAATAGAGAAAGATTTAAC…
FTT1665	FLH154412.01X	FtCD00020752	AY774027	pyrB	aspartate carbamoyltransferase	ATGCTATCATTTCAAAAGTTACTACGCGGTGATCAAATTACTAAAGATGATTTGTTTAAACTATTTCATCAAGCTGATATTTATAAAAATAAACTAGCTAATTCAGAGCCTATCAAAGATTTAGAAGGCAAAATATTAGCATCTCTTTTCTTTGAACCAAGCACTAGAACTAGATTCTCTTTTGAATCTGCTATGAATAGACTTGGTGGTAAAGTAATATCACTAGAAAATGGCTCATCAAGCTCAACACAAAAAGGTGAAACCCTTGATGATACAGGTAGAATGATTGATCAATATGCTGATATTATCGTGATGCGTCACCCTAAACCACATAGTGTTGAAGAGTTCTCTAAATATGTCAACTCTCCTGTGATAAATGCTGGCGATGGTGAAAATGAA…
FTT1666c	FLH204132.01X	FtCD00022596	DQ681776		3-hydroxyisobutyrate dehydrogenase	ATGGCTAAAATGAGTAAACAAGTTGGTATTATTGGTTTAGGAAATATGGGATCTGTTGTTATAGATCACCTGCTAACATCAGGATATGAGATTTTTATTCATAATAGAACCAAAGCAAAAGCTGAAAAATGGTTAAGAAATACACAAGTAGTTTGGTGTGATTCTCCAAAAGAGTTAGCTGAAAATTGCGAAATAATAATTTGTTGTCTATATAATGATATTGCTGCAAAGAATGTTTATCTCAGTAAAAATGGCTTAACTTCTATAAATTTAGTAAATCATACAATATTAGATGCGAGCACTCTTTCTGTAAGCTGTTTTGAGCAACTTAATAAAGTCGTTACCCAAAATAATGGTAAATTAATAGATATGCCAATATCTGGAAATCCTGCTGCATTA…
FTT1667	FLH155726.01X	FtCD00020895	AY774231		hypothetical protein	AGGGATAAACTTCAAGCTCTCTCATCAAAATTAAATTTCAAAAATTTTTCACACGGCTATAACAATAGTACTAAGAGATTAAATAAAGATTTTAATTATGCTTTTTCTATGGAATTTAATTCTACAGCTGAAAGAGATAATTATGAAAGTGACCCTATTCATATAAATATAGCTAAACAACATTTATTACCACTAATTAATAATAATACAGAATCTATACTAGTGTTTGATTTCTAG
FTT1668	FLH204176.01X	FtCD00022628	DQ681777	sdaC2	serine transporter	ATGAAAAGAAATGAAGATTTAATGTGGTCCCTTAGTCTGTATGGTACAGCTATCGGTGCCGGTGTACTATTTTTGCCAATTCAAACTGGAATTTCAGGAATTATACCAATATTAGTGATATTAGTATTTATCTTCCCAATGGTGTTTTTATCACATCGTGCATTATGTAGATTTGTGATATCTAACCCAAATACTAACTCTGATATCACAGTAGTTGCTGATGACTATTTTGGTAAGCTTGGTGGAATTATTTTCAACATTTTATATCTATTTGCTATCTTGCCAATATTACTGGTTTATAGTGTTGGTATAACAAATACTCTGGCTAGTTTTTTTAAGTATCAGTTTCATTACGATATTCAAAATAGATTTCTTTTGAGTTTTTTTACTATACTTTCG…
FTT1671	FLH204154.01X	FtCD00022611	DQ681779	ribD	riboflavin biosynthesis protein ribD	ATGAAAAATATCGATAAATATTATATGCAACAAGCACTTACTCTAGCAAATAGAGGTAGACTTACAGTATCACCTAATCCAATGGTTGGTTGCATAATAGTAAAAAATGGTGCAATTATCTCGGAAGGTTGGCATGAAACTGTAGGAGAAGCGCATGCAGAGGTTCACGCACTGACAAAAGCGGTTGATAAAGCAAAAGGAGCTACAGCATACGTAACACTAGAACCATGCTGTCACTGTGGAAGAACTCCTCCCTGTACTGATACCATAATCAAAGCTGGGATAAAAAAAGTAATTATTGCTACTCTTGATCCAAACCCTAAAGTTGCTGGCAAAGGCGTCGAAAGACTCAAAAATGCTGGTATAACAGTCGAAGTAGGCTTACTAGAGAAACAAGCA…
FTT0610	FLH157993.01X	FtCD00021178	AY774511		DNA/RNA endonuclease family protein	ATGACAAAAAAAACATCTAAGCAAAAAGATACTAAAAAACAAACCACTAAGAAGCCGATAAATTATATAAAAATATTTATACTACTAGCTTTAACTATTGGTGGCGGATTTTCCGGTATTTTTTTTGACAAGTTTGATTTAAAAGAAAAATTTATAAACTTTAGGCATGCTGTATATAACTATTTCACTAGTGAACCAATAAAGCACTATACCACCAAAGATAACGAGAATATTATTGCTAGATTTTTTTCACAAAGTGATGAGGGGAAAAAACAACAGCAACAATCAAATGAGTTTGACAACCTCAAGCAGTATCCACCAGTTAGAACTCTACCAGCAGTTACTGATTATTGCCATGGTTTTCTAGCTTATGGTAATCCTAGTTATGGTGTAACTGAT…
FTT0611c	FLH157947.01X	FtCD00021172	AY774149		beta-lactamase	ATGCGTCTTTTAGTTACAACTTTATCATTAATCCCGAGTATCATACTAGCTGCTCCTCAATTAGATGATTCTTTTAAAAATCTGGAAAACAAATATGATGGAAAAATTGGCATCTACACTCTCAACACTGATGATAAAACTAACATCAAATATAACGAAAGCTATCACTTCCCTATTTGTAGTGTTTTCAAGTTTTTATTAGTTGGTGCAATTTTAGATTATGATATGCATAATCAAGGCTTCTTAGATAAAAAAATTCCAATAAATCAAGATGATATTGGTAAACTCGGATATGCTCCTATTACTGCTAAAAACGTTGGTAAAACTCTAACAATATCACAACTTAACTACGCTGCTATCCTAAGTGATAGTCCTGCCAGTAACATATTAGTTAGAGAA…
FTT0612	FLH231453.01X	FtCD00039359	DQ681780		hypothetical protein	ATGGCTATTGATTTATTAAAACTACAAAATAAGCTAGGGTATGGTGTTGCTGCTAGAGGAATGTGTCACGGAATAGCTTATATGGCTATACAAGCTATTATAAGAGATGCTTTAGAAACATATATTAGCAGAATAAGATATTTAGAAGAAACATTATCGCAACATAACAATAATCAAGATGCTGCGATTAATGAAATTGTAGAAAAAATAAATGTAGCATATGAAAAAAGGAAGAATAAACAAAATCTAGATTGTGATGAAATAAAATTATTAGATATATTAAATTGGTTTGATGGAGTTCAAATATACCAAAATCACAATAAACTATTATCTGGAGGTCAAAGTTATGAGAATGCAACAAACTTTTTCTCAGCTAATACAAATCAAAATGAAAAAGAA…
FTT0613c	FLH154053.01X	FtCD00020713	DQ681781		hypothetical protein	TTGAAAAAGTTAATTACACTATCAACATTACTATTAATATCTCTAACTAGTATTGCTTTTAGTAAAGAGTTAAATAATTATTCTGATATTCTAAATGCTGTAAAAGATGGAAAAAATATTACTATCTTTGTTGATTTCTTAAATTGTAAACCAGAGATAAAAGTATCTGGGCAATTTAGTCCTAAATCAATAATGATTCACAATGATTCTATAATTTTTTCAGATACCCATTTTACTAGAAATAATCCACAATACCCAAATGAGCCAATACTAGAATATGTGGTTTATAAAATAAATGGTAATAATGTTAATATAACAATAGATATTCTTGATGCTAATAATAGTCCCATGGAACACTCTAAACGTATTACAATTGGCTGCCAAATTACTAAAGATCAA…
FTT0614c	FLH154221.01X	FtCD00020738	AY774644		Apolipoprotein N-acyltransferase	ATGAAGGAATTAATATTTAGAATAGTTCTGCCACTATTAAGTGGTGCAATACTTACTTTAGCATTTGCACCTTTCCGTATAGATATACTAGCTTTAATATCTCTAATACTTTTTTTCTATCAGCTAAATAAAGCAACTAAAATCCGCAGTGCATTTTTTACCGCGACATTATTTGGAATTGGTTTTTTTGGCACTAGCATATCATGGGTATATATAAGCATACACTTATTTACTGAGTCGATTGCTGCTGGCTTGTCTGCGGCAGTTGCTTTAGTAATCTTGTTAAGTTTTTTACATATAATACCTTTTGGTACATTTAGCTATATCCTTACGCGCAAAGCTAATAATTTTGCTAAACTACTAATCTACCCTGCCTTATGGACACTTTTTGAAATAGTT…
FTT0615c	FLH204547.01X	FtCD00022812	DQ681782		metal ion transporter protein	ATGAACAAGAGAATCAAAATGGCAGATAATAATCCTTTTATAAAAAGACTTACCTCAAGCATTTTTAATATAAAAAGTGAAGAAGCTCTTATCGATGCTATCAATAGAGCTGCTGCTAATGAGGTTATTGATAAGACATCACAAAATATGCTAATAGGTGCGATGAAAATATCGTCATTAGATGTTGGTGATATTATGATATCGCATACAAAAATAGTTGCTGTAGATATGTCTATGTCTATTAGAGAGATCTTAAAAAAGACGATAAACTCTAGTCATACGCGACTACCAGTCTACTGTGAAAACAAATCTGAAATACTAGGAATTTTACACTCAAAAGACCTACTAAAACTAATCTTTGAAAAAGAAATTGAATCAGCTGATGATGAAGAACTCAAA…
FTT0616c	FLH231443.01X	FtCD00039354	DQ681783		cconserved hypothetical protein, UPF0054 family	ATGAAGAGAAAACTAAAAATGGATAATCTAAATATAAATTTCATCAATGATGACGAACACCCCATACCTAGTCAAGATTTACTGCTAAAATGCCTACAACTTGTAGCTAACAAACATCATATCAGTCATGCTGAAGTTAATCTAAATATTGTCTCGAATGATGAAATTCAACAAATAAATAAACAGTTCCGCAATAAAGATAAACCAACAAATATCATTTCCTTTGAATTTGAAAAGCCTCAAGGCTTACCTGATGATATTGCTAATGATTTCTTAGGTGATATTGTAATAGCGCCAGCGGTATTAGAGAATGAAGCCAAAGAGCAGAACAAAGAGCTCAATGACCACTGGCAACATATTTTTATCCACGGTTTGTTACACTTGCTTGGTTATGATCAC…
FTT0617c	FLH154000.01X	FtCD00020708	AY774619	phoH	phoH-like protein	ATGAATAAAACTCAATTTATTCTTGAACCTTATAACTACGATGCAATGATGCTACTTTGTGGCAACCTTGATGAAAATATTCGTGCTATCGAAAATTATTTTGATGTCGAGATTCGGCATCGTGCCGATGAGTTTGAGATCACTAGTGATTCAAGCACTAACAATACTCAGGCGAAAAGATTTATCAAATCTTGCTATGCTGAGATTCTAGCTGGCAATACTGAACTTGATTTAGAGCAGATTACAACTATCCTTAATGCTACTGCTAAAGATAAAGCTGCTGCAACTGCTAAGTCACGTAAAAAAGTTGAAGAAGCTGAAGTTCAAATGAGAAGCAAAAAACTCAAAGCGCGTACACACAATCAAGCAATATACTTAGAAAATATCAAAAACAACTTT…
FTT0618c	FLH154134.01X	FtCD00020723	DQ681784	yleA	conserved hypothetical protein yleA	ATTAAAGAACAAAAAAAGGTTTTCATAAAAACTTTAGGTTGCCAAATGAATGAGTATGACTCTGCTAGAATGCATGAGGTTCTAAATGAGCATTTTGATACTGTAAAGACAGATGATTATAAAGATGCAGATATCATCCTTATTAATACTTGCTCTATCAGAGAAAAAGCTCAAGAAAAAGTATTCCACGAGCTTGGAAGATGGAAAGGCCTAAAAAAAACTAATGAAGATCTAATAATCGGTGTTGGTGGTTGTGTTGCTTCACAAGAAGGTGAAAATATTATCAAAAGAGCTCCTTTTGTTGACCTAGTATTTGGTCCGCAAACTATTCATAGACTTCCAGAGATGATCAAGCAAAAGCAAAAAACTCAACAATCTCAAGTTGATATATCATTTCCA…
FTT0619	FLH154233.01X	FtCD00020740	AY774651		o-methyltransferase family protein	ATTCAAAATACACAGAGCTTTTTAAACATATTAATTTCGATGAGGCAAAATCAATTTACACAAGATGATATTTGGCAGTACTGTCTTGAGCATACTAGTGATTTATCAGACAATCTCAAACAGCTAAGCGAATACACACGTGAAAATATTCACGGTGCACAAATGCTTTCAGAGAAGATGGTTACTAAATTGTTACAATTTTTTGTTTTTGCTACTAGGGCAAGAGTATGTGTTGATGTTGGGACATTTACAGCTATGTCAGCGATTGCAATGGCTGAGGCTGCCCCAGATACCAAAGTTTATACCATAGATAGAACTAATCAAGTAGGTGAGCAGCTAGCAAAAGAGTTTATTGCTAAATATCCCAATATTGAATATTGCCAAGGTAACGCTATGGAT…
FTT0620	FLH231447.01X	FtCD00039356	DQ681785		HAD superfamily protein	ATGAGACAAATAATATTAATCTTTGTGATTGCTATGCAGTTTTGTTTTGTCACTGCTTATGCAGCTACGTGTAATAGTGTAAATATCGATGGTGTTAAGTGGTATCATGATTCTGATGAGAAAAGAGCAATTTATCTTGAGATCTATAATCTAGCTGTACATAGAATAAAGCATCAAGTTAAAGAAGAACATCTTAAAAAAGGCACATGGGGTGTTATCTTAGATATTGATGAGACAGCCTTAGATAACTCATGGTTAGAGTATGATAATTACAAAAACTATAGTTATAGTGAAGAGAAGTTTAGGCAGGGGATAATTGAGCAAAAAGCAAAAGGTCTACCTGGTGCTGCTAAATTAACCAATCTTGTCCATAAACTAGGAGGGTATGTAAGCTTTGTA…
FTT0621	FLH204584.01X	FtCD00022835	DQ681786	tdk	thymidine kinase	ATGGCGAAATTATATTTTAGATATTCGGCTATGGATGCTGGTAAGACACTAGATCTTTTAAAAGTTGCTTATAACTATGAAGATAGAGGTAGGAAGCCCTTAGTATTAACATCAGCGATTGATAAAAGAGCGGGGTTAAATAAAGTTAAATCACGCATAGGTATAAATCAGGATGCTTACTCACTGACTGATAGAGATAATATTTTTGAATTTGTCGAAAATTATAATAGTAGTAACAAGATAGATTGTGTATTGATAGATGAAATTCATTTTTTTACTCAAGAGCAAGTTTGGCAATTAGCAGAGATAGTTGATGAACTAAATATTCCTGTGATTTGCTATGGGTTACGTACTAATTACTTAGGTCAGCCATTTGAGACAGCAGCATTACTTTTGGCT…
FTT0622c	FLH204570.01X	FtCD00022824	DQ681787		hypothetical membrane protein	ATGGTAACTATAATTTTAAGTATTTGTTTACTAATCACACCCTTCATAATAGCGTTTTTGCACTCAAGCATTATTCATGCAAAACATCACATAAACATCTACGCAAACTACTTTATAGTCAGCAATATAAGTCTGTATAATTTAATCAATAGTTACGCATATCTGTTAGATGGGGATAACATAAGTAAATTTCAAGGATGGATTTTCACTCCGGCTGTTTTTCAGATAGGAATCTTTCAATTAGCACTATTTTTATTTTCGATTTTAGCACTGTTTAAGAATAGTCAGTTTAAAGCTTCTTGTTTGATATTTTTTACTATTTATACAGTTTTAAATTCGCTAACATTATTTAGTGGTTCTATTTACTACTCAGGCGTTGAAACTATATTCTTTGTAAAT…
FTT0623	FLH157718.01X	FtCD00021145	AY774476	tig	trigger factor (TF) protein (peptidyl-prolyl cis/trans isomerase)	ATGCAAGTTATTGTAGAGAAAAAAGAAGGAATTCACTGTTCACTATTAATCGAAGTACCAGCTAACGAAATTGATAGTGTAGTTTCAAAAGAAATCAATAGAACTGCAAAAACTATCAAAATGGATGGTTTTAGACCTGGTAAAGTGCCTGCTGGTATGGTTAAGAAGAAGTATGGTGAGCAAATCCGTATGGAAGTGATTTCTGATCTTATTCCTCAAAAATACTCTAAAGCTATTCAAGATGAGAAGCTAGCAGTTGCTGGTATTGAAGTTGAATTAAAAGAAAATAAAGAAGGTCAGCCTCTTAAGTTTGTTGCTAATCTTGAGCTTTTTCCTGAGTTTGAGGTAACTGGTTTTGAAAAAATCGAAGTTCAAAAGCCAGTTGTTGAATTAACTGAT…
FTT0638	FLH157666.01X	FtCD00021139	AY774447		hypothetical protein	ATGGTAAACTTTTTTGGTGCTAATTATGATAAGAGTTTTGTAGCTAAGGTTAGAGAGTTGATTGAGAGATTCCTAGTTAAGAGTAAATCAATCAATGTTTCTGATATTCAAGATATTATCCAAGATGCTACAGAGATGGCAGATGCTGTTAGCAAAGATGTTTTAGATGTTAAATCATTTAAGGTAAAAGTAGAATTAGATCAAAAATCTGTTGCTGAGGTTACTGTAAAAGTCGCTGAACAGTTATACTTTGCATCAAGCTCTAGTGTCGGACCTGTCGATGCTGTTTTAAATGCTTTGTACAAAGCTTGTCCTAGTGATATTAGTTATAATCTAACAGCTATAAAGTAG
FTT0639	FLH157500.01X	FtCD00021123	AY774456		hypothetical protein	ATGAGTTTAGAAAAAGAAGGTATCAAGAGTATTGGTAAAGCAGTATCTCCAGATATAATTCAGGCGTCGGTTGAAGCATTTATTGATGCCCATAATATAGCATATGCTTAG
FTT0640	FLH204625.01X	FtCD00022857	DQ681788	ilvD	Dihydroxy-acid dehydratase	ATGAAAAAAGTATTGAATAAATATAGTAGAAGATTAACTGAGGATAAGTCACAAGGTGCTTCTCAAGCAATGCTATATGGCACAGAGATGAATGATGCAGATATGCATAAACCACAAATAGGGATTGGTAGTGTGTGGTATGAAGGAAATACATGTAATATGCATTTAAATCAGTTAGCACAATTTGTAAAAGATAGTGTTGAGAAAGAAAACCTCAAGGGGATGAGATTTAATACTATCGGAGTTAGTGATGGTATTTCTATGGGTACAGATGGTATGAGCTACTCATTACAATCTAGAGATCTTATTGCAGACTCTATTGAGACTGTAATGTCTGCACACTGGTATGATGGTTTAGTATCTATACCTGGTTGTGATAAGAATATGCCAGGATGTATG…
FTT0642	FLH157643.01X	FtCD00021137	AY774147	ilvH	acetolactate synthase, small subunit	ATGAGTGAAAATATATATTTTATAACAATGAATACTGAAAATACTCTTTGTGTTTTACAAAGAATTTCTTCTGTTCTTTCACGTAATCGTATAAATATAGAACAGTTAACAGTATTTGAAACGGCAAACAAAGGTATTTCTCATTTCAATCTAGTGGTACATAGTACACAAGATAAAATAGAAAAAATCGTAAGAAAATTAGCAAACGTTATCGAAGTGATAGATATTAGTATTACAAACTGTTTGCCAATGCAAGGAACTGTTGTAAGTGAAGTTCCTCAAAATGTCAAAACGGCAAGTCAAAGAAAAGCAGCTTAG
FTT0644c	FLH230087.01X	FtCD00039291	DQ681789	mfd	Transcription-repair coupling factor,ATP-dependent	ATGCTTAATAACCAAATATCTGCTAATGATACAGTTGTATCTAATGCTTATGGATCTGCTTTTAGTATTTTGTTTAATGAATATCTCAAGCAAAATAATCAGTTTAATTTAATAGTTACTGAAGACTCACAACAAGCACATAAGATATACAAAGAATTAAAATATCTAAATAAAAATAATTCAAAGGTAGATATCCTATTTTTTCCAAATTTAGAAATCCTTCCTTATGATAGGTTCTCAGCTTCTATAGATATTATCTCTAGACGCCAAGAAATCCTATATAAGATGACACACCAACCCCAAAAGACTCTAATAATCACAAGTATCTCAAATACACTAAGAAAAATAGCACCAGCAAGTTTTATACAAAAGCATAGTTTTATACTTAAAACAGGTGAT…
FTT0645c	FLH157520.01X	FtCD00021124	AY774469		conserved hypothetical membrane protein	ATGAACAACTTACAAAACAACACTCGTGTGATAGACTCCCTCTCTCAAGAGTCTGTACTAAGAGCAAACAAAGTTCTTAGAAATACATACTGGTTGCTATCTATGACACTACTATTTAGTGCTTTTACAGCATTTATAGCAATGAGCACAGGTGCAACGATAATGAATCCATTATTAATGCTAGTAGTTTATATTGGTTTATTATTTGGTATTAATGCTACTAAAAACTCACCATGGGGTATAGTTTTAACTTTTGCGCTAACAGGTCTTTTAGGCTATTCGCTTGGTCCTATACTTAATATGTACCTTACTATGTTTAAAAACGGTGCAGAACTAATCATGATGGCATTTGGAACTACTGGTCTGATTTTTCTAGGCTTATCTGTAGTTGCAATGAGC…
FTT0646c	FLH204589.01X	FtCD00022839	DQ681790		hypothetical membrane protein	ATGAGAAATTCTATAAAAATTTCAAAAGTAAATATTAATTTTAATCAGCCTAAAGGTTTACATATCATTGCTTTTATGATTTTTTGCCTATGTTTATGTATTGCTCCTTTTATGACTATATTAAATGGCTATGGTAATATCAACTTCTTCTATAATCGTAATGATCATCTTTTTGTGATATTTTTTGCTGGAATTTTTGGCTGTATTAGTAACTATATTTTTGGTTCAACTAAATCAATTATTCATGGCTTACAATTCATAATAGTAGCAATCGTTTTATCTTTTATTCACAATATGGTTTTATTTAGTTGTGCTACATTATGGATTGGTCTTGCAATAGTTATCGTTAATCTACTTTTTAACTTAAGTGCTTTTTATCTAAAGACAGATATTCGCAGA…
FTT0647c	FLH153469.01X	FtCD00020646	AY774693		hypothetical protein	ATGATCCTCTCTCAAGATAGATATCAGTTACGCAAGCTTTTTATCGATAGCTGGAATAAGTTTGTCAACAACACACCTTTAACTGCTCTAGAAGAGCAAATAGCTAGGATTATAGAGCTACATCCAGAGTACCATAAACAAATTACACTTGAAAATATTGATAAAGACTACTTACCGGAAGTTGGGCAAATAAATCCTTTCTTGCATATAAGCTTACATTTAGCGATTATTGAACAAATTCAAACAAATCGTCCATTTGGTATAAGCAATGTATATCAACAGCTTCTAGGCAAATATAATAATGATGAACATAAAGTACACCATATTATGATAGACTATCTTGCAGAAGAAATGTGGAAATCACAAAAATATAATACTCTCCCAGACGAACAAAACTAT…
FTT0648c	FLH204594.01X	FtCD00022844	DQ681791	nth	Endonuclease III	ATGAATAAGCAAAAAAGAATTCAGATTTTTGAAACATGGAAACAAAATGACCCAAAACCAACAACAGAACTTGAGTATACATCTAATTTTGAACTTCTAATTGCAGTAATTTTATCAGCTCAAGCAACTGACGTAGGTGTCAATAAAGCTACTAAAGTATTATTTAAAGTTGCGAATACTCCAGAACAAATATACGCTCTAGGTGAGCAAAAATTAGCTGAATATATAAAATCTATAGGTCTATACAAAACCAAAGCTAAAAATGTCATAGCTACATGTAAAGATTTGATTGAAAAGTTTGGTAGCATAGTACCAGATAATTTTGATGATCTGATATCGCTAGCTGGTGTCGGCAGAAAAACTGCAAATGTAGTGCTTAATACTGCATTTGGTAAACCT…
FTT0649c	FLH204592.01X	FtCD00022842	DQ681792	rnfB	Iron-sulfur cluster-binding protein	ATGATTATATCTATAGAAGCAATTGATAAAGTATTACCACAAATACAATGTCAAAAGTGTACTTATCCTGATTGTTATAGCTATGCTAAAGCTATAACAAATGGCGAAAAACATAATAAATGTATTACAGGTGGAGAGAAGACTTTAAAGGAGCTAGCAAAACTTTTAAATAAGCCTGAAATCCCTTTAGATAGCTCACTAGGACAAGAAAAACCTCGAGCTGTTGCAAAAATTGATGAATCAATGTGTATTGGTTGTGAGAAATGCTTACTTGCATGTCCTGTTGATGCTATAGTAGGCGCAAAAAAACTCATGCACACTATAATTGAAGCCGAATGTACAGGCTGTGAACTATGTGTAGAACCATGTCCAATGGATTGTATATCTTTGGTAGATTTA…
FTT0650c	FLH204598.01X	FtCD00022846	DQ681793	grxB	Glutaredoxin 2	ATGAAAATATATCTATATCACCATTGCCCTTACTGTATAAAAGTAAGACTAGTTGCTGACTTAAGCAATTTCGACTATCAGATGATAATTCTAGCAAATGATGATGAAAAAGCTCATATCGATAGAATTGGCTCAAAACAAGTACCTTTTTTAGAAAAAGATGATGGTACTTTTATCAAAGAAAGTGATGAGATCTGCAAGTTTATTGCCAAGGTTCAGAATTTTGAAATTGCAGAATCAACTATTGATGATTTCGTCAAAGGCTGTATTACCGATCTAGAGCCACATTATCGTAGAATTATATATCCTCGAATTCCTCATCATCCACGTAATGAATGTGACTTTCCAACGCAAAGTGCTAAAGAATATTTTATAAATAAAAAATCTCAATATATTGGT…
FTT0651	FLH231450.01X	FtCD00039358	DQ681794		Proton-dependent oligopeptide transport (POT) family protein	ATGTTTAAGCAATCAACTATTGTGTTAAAAAGTACAAAATTTGCTAAATTTTTATTTTTATCTCGCAAAAAAGACATTAGTATAAAATTAAATACTATGTTTAAGGATCTAAAATCAAAACAAAGTTTCACAATCGTAGCAATTACATTTTGGGGACAATTTGCAACTTATAGTTTCAATGCTATTTTAATCTTATACTTGACGAGATCTGTATTAGATTATGGTATTGGCTTTTCAGAAAGTCATGCTTATTCATTTCAAGGTATTTACAAGGCAATGAATTACGCAATTATTATGTTCGGTGGATATATTGCTGATAGATATTTAGGTTTAAGAAGATCTATATTTTGGGGAAGTCTACTATTAGCTTTTGCATATTTAGCTGTATTTTTAAGTGGC…
FTT0652c	FLH153525.01X	FtCD00020654	AY774664	ftnA	Ferritin-like protein	TTGATATCAAAAAGATTATTATATGCTTTAAATGACCAGTTTAACTACGAACTAGAATCAGCAAATATTTATTTAGCTATGGCTGGTTACACTGCAGATCTTGGTCTTGGCGGCTTTACTAATTGGTTTATGGCACAATACGAAGAAGAACTTTTTCATGCGAAAAAGATAATGAAATTTATCAGTGACAAAAATGGTCGTATTGAAGTCAAATCTGTTGCAGCACCGCAAAATAACTTTAATTCATTACTTGAAGTTTTTCAAGCAACTCTTGTACACAAACAAGAAGTCTCTACCAGATTTTATGATCTAATGAATATAGCTTTAGAAGAAAAAGAGCACTCTACTAAGAGTTTTCTTCAATGGTTTATCGATGAACAAGTAGAAGAAGCGACTGTT…
FTT0653	FLH153390.01X	FtCD00020639	AY774691	lipA	lipoic acid synthetase	ATGAAAGGAATATCTGGTATTAAAGTTAAAGTTGAAAGTGGCTCTAAGTACACTACCGATCATGGTTTTCATGCTGTCAAAGATGGTATTAGAAATAAGAAAGAAAATGCTGTGCATGTACGTAAACCAGATTGGTTGAAAGTGCAAAAACAAGATTCTAAAGAATACCTAAAAGTTAAATCCATTACAAAAAAACATAAACTTTCAACAGTTTGTGAAGAAGCAAGGTGCCCTAATATTAATGAGTGCTGGTCTCATGGTACAGCAACAATTATGTTAATGGGGAGTGTATGTACTAGAGCTTGTAAATTTTGTTCTGTAGATACAGGTAATCCAAAAGGTTGGTTAGATAAAGATGAACCTATGAATGCTGCTGAAAGTGTAAAGCTCATGGGACTT…
FTT0654	FLH153620.01X	FtCD00020664	AY774671	elbB	DJ-1/PfpI family protein	ATGGCAAAAGTAGCGGTAGTATTATCTGGATGTGGTTATCTCGATGGTTCAGAAATACACGAAACTGTATTGACAATATTAGCATTAGAGAAACAAGGAGTAGAGTGGCAAGGTGTTGCGCTAAATAGAGATCAAAAGCAGGTGATTAATCATTTGCACCAATCTGTAGATAGCAAAGCATCACCGCGTAATATTCTTGAAGAATCAGCACGCATTACTAGAGGTAATGTCATTGATATAGCTGATGCAGATAGTGATGATTATGATGCGATAATCTTTCCAGGTGGTTTTGGAGCAGCTAAAAATATTATGGATTTTGCTTTTGTTGGCGATGATAGTTATCAAATGGATGAAGAAGTTCTAAAATTTGCTCGAGCTTTTTATTTAGCTGATAAACCC…
FTT0655	FLH153658.01X	FtCD00020669	AY774690		hypothetical protein	ATGGCAGGTCATAGTAAATGGGCTAATATTAAGCATAAAAAAGCAAAAGAAGATGCAAAACGTGGCAAAATCTTCACAAAGCTAATTAGAGAAATAACTGTTGCTGCAAGATTAGGCGGTGGTGATAAAGATGCTAACCCGCGCTTAAGAGCTGCAATTGCAACTGCACTAGCAAACAATATGAGTAAAGATACTATCGAAAGAGCCGTAGTAAAAGGTGCTGGTGGTGATGAAAGTGCAAATGTAGAAGAAGTTCGCTACGAAGGTTATGGTCCTGGTGGTGTAGCAATTATTGTTGACTGTATGACGGATAATCGTAATCGTACTGTTGGTGAAGTTCGTCATGCATTCACAAAAAGTGGTGGTAATCTTGGTACAGATGGTTCGGTTGCATATATG…
FTT0656	FLH153541.01X	FtCD00020656	AY774674	ruvC	holliday junction endodeoxyribonuclease	ATGGTTATAACAAAGTATTATATGGTTATTTTAGGAATAGATCCAGGCTCAAGGATAACAGGTTTTGGGGTTATAAAAGTCCAAGATAATAAAATCTATTATGTTGCAAGTGGCTGTATTCGGATAACAGAAATAACTACTCCAAAAAGACTCAAACAAATTGCTGATGGTATAACACAGATTATAAATATATACGCACCAACTGAAGCTGCGATTGAACAAATATTTATGTTTCAGAACCCTATGGGAGCTATTAAGTTAGGACAAGCTAGAGGTGTAGCAATGTGTACACTAGCTATTAATAACCTAGAAGTTAGCGAATATTCAGCAAAACAAATTAAACAAGCTGTAGTAGGTACTGGAGGAGCTGCTAAATCTCAGGTCCAGCACATGGTTCAG…
FTT0658	FLH204600.01X	FtCD00039252	DQ681795	ruvA	holliday junction DNA helicase, subunit A	ATGATGATAAGTTTTATAAAAGGTGTATTGATAGAGAAAGATCCAACAGCTTTGCTTATTGATGTAAATGGTATTGGTTATGAAGTTTTTGTACCGATGACAACATTTTATACATTAGGTGATATTGATAGTCAGGTTAGCCTTTATACACATTTTGTAGTTCGTGAAGATGCTCAGCAACTCTATGGGTTTAAATCAAAAGTTGATAAGAAAGTTTTCCAAGAGTTAATTAAAGTCAATGGTATAGGAGCTAGAACAGCTATTGCTATTTTATCTGGTATGGATTCAAAAACTCTATTACATTGTATTGAAAATAAAGATTATGCTTTATTAGCTACAGTGCCAGGAATTGGTAAAAAAACTGCTGAGCGTTTAGTTGTAGAAATTTATGATAAGTTA…
FTT0659	FLH153522.01X	FtCD00020653	DQ681796		DNA recombination protein RmuC family protein	ATGATACTAGCTATAGCATTAATAATGCTATTAATTATTTTTGGCATAATATTTTTTTTAATAATTAACAAAAAAACCGCACAAGTTGATAATATCCGTCAAGCATTTGAGCAATACAAAAACTCCACACAAGAAGAATTAGTATCACTACGAAGTAAAGAAATTACATTTGATACATTATTAAATCAAGAAAAACAAAAGAATACAGAATTAAAGCATGATAGTTTACAACGTATAGATGAATTAAAGCTGGAGTTAAAATTAGAGAGAGATAAAGCCTATAACTATATTGAAGAGATAAAAAATTATAAATCACAAATAGCAACTCTAGAAACCCAACTTAGAGAGCAGAATAATTCTCTAAGAGATAAAATAGAGTTATTACAAAATAGTGAAACG…
FTT0660	FLH153573.01X	FtCD00020660	AY774689		hypothetical membrane protein	ATGCGATTTTTTAAAATACTATATTTTTTCTTAGAGTCATTCTGGAAATATTTAGGTAAGTCACAAGATAAGAATTTTCGACTTATACATATATCGCTTGCTATTCTAGTTATTGTCCAAATACTTGATAGTGATTATGTGCATACTCGTTATGGCTTAAGTGTTGGAGCTTATTTACATATCTGTGTTGGAATGACAATAGCTATTTTAAGCATTATTATGATAATTGCTGCACTTGAGAAACGCGGCTTACGCTACTACTATCCTTATCTATTTAATGATTATACAGCCCTTAAATCAGATTTATCCGAACTAACAAGACTAAGGTTGCCAAATCCAAGAAGTGGAAGCATAGCTGCTATTGTTCAAGGTTTTGGTTTACTAGCTTTGAGTATAGCC…
FTT0661c	FLH204554.01X	FtCD00022815	DQ681797		hypothetical protein	ATGCCTACAAAAAAACAACAAAGTTGGACTTTCTTAACAAATCATTCGCATGTGTTATGTCTCATTAATAGTGACCCAAACATCACTATTAGAGATATGGCTATCAAGGTTGGGATCACTGAACGAGCGGTCCTAAATATTCTAAGTGACCTAACCGAGACAGCCTATCTAACTGTAACAAAGATTGGTAGAAATAATCATTATACTATCAACAAAGATAAAAAGCTTAGACACCCTATTGAAAGTCACTGTAATATTGATGATTTCTTGAAACCTCTAGCAATAAAGAAATCTTAG
FTT0662c	FLH204560.01X	FtCD00022818	DQ681798		hypothetical protein	ATGAACTTTACTACATATAATAAAGTTCATAGTTCAAGAGAGGAGAAAAATATGAATAGACAAGATATAGATAAGGCATTAGCTAAGTGGAAAAATGGCTTATTAAAGATTTCTAAAACTTATAGGGAAGGAGGAGACTATAAGCAATTAGCTCACGATTTTATCAAAGATATGTATGCTTATGATAATAGTGAAGTTCTTTTTAAGCCAACTCTAGCATCTAATAAAATGTTTAGAGGCGACTTAGAAGGTGCAGTATCTTATTTTGTTGCAGGCAATGATAAATACCCTGAAGATAATGGTTTTGCTATCGGACCATGGGCAGATCTAGAATTTGAAAATGCCGGCTATATCGTTGAAGACAATATTGGTATAGTTATGTAG
FTT0663	FLH204630.01X	FtCD00022859	DQ681799		hypothetical protein	ATGAACATAGTAGATTCACATATTCATTTCTGGGATATAACCAATGGTTATAATAATTGGGTTAAAGATACCAATTTGCCAAAACTGGTAACACCAGAGAATTTAGAGGCGAGTGCTTTTGTGCATATAGAAGCTCACAGTGAGAAATTTGATCCTTTATGTGAATATAATTGGCTAAAATCTAAATTTAACAATAGTAATATTAAAGTAGTAGCTTTTGTTGATTTTACATTAGAAATTTCTCAGTTTGAAAAAAAGATCATATACTTATCTGAACATAATAATATCGTTGGCATACGCCAAATTATGTCAAAAACGTATAAATCAAAATATAGTCCATTTGAAAAATGTATACCTAAAGATTTAGAGCAAAAGTTAAAAATTCTAAGAGAACATAAA…
FTT0664c	FLH156573.01X	FtCD00020997	AY774126	hdc	histidine decarboxylase	ATGAAAAATATTGAAGATTTAAAACTTAGGCTAAGACATAATAAAAAAGTTTATGTCGGTTACCCTACCGCTACAGATTTTGATTATGATAACTGTAAAGAGCTAATATCTGAGCATTTTAATAATATTGGCAATCCATATAGTAAAGGCTCTCCTTTTAGTACTTTAGGTCACGAAAGAGCTGTTATAAACTTTTTTCTTAAGCTATATATGTCTAATACAAATGATTCTTGGGGATATATAGCAAGCTGCAGTTCAGAAGCTATACTTTATGGTGTTTGGAATGCTAGAAACTACTTTAAGGCTTATGATGTAACTTTGGTATATAGTGATTATGCTCATTATTGCGTAAGTAAAACTGCAAATATATTAGCAATCAAAAATAAAGTTATAACTTCT…
FTT0665c	FLH204586.01X	FtCD00022837	DQ681800		Aldolase/adducin class II family protein	ATGTCTACAGAAAAAAATCTCAGAAAGAAATTAGCAGTTTGTCATCATGTAATACATTATTATGGTTGGGATGATCTATTAGCTACACATATATCAGCAAGGCTCCCTAATGGAAATGTAATTATTACACCACATAATGTTACCTTCAATAAAGTTACCAAAAAAAATATTGTTACCATAACACCTAATGGAGAAATAGTTTCAGATAATGGTTATAAAGTAATGCCTCAAGCTGCCAATATCCATTTAGAAACATATAATGCTAGAAAAAATATTAATGCTATTATCCATACGCATAGTAAATATGCTGTAATACTCTCCTCATTAGAATGCGGTATGCAATTTACTAATCAACAATCATTAAGATTTTATGATGATGTATCTTATCACCACTATGAT…
FTT0666c	FLH204582.01X	FtCD00022833	DQ681801		Methylpurine-DNA glycosylase family protein	ATGAACAACTTAGAAGCAATTCTTCGACTTAAAACTATTGATGCTGCAAAAAAATTATTAGGACATTTTTTAGTTAGTAAATACAATAATAAAATACTAATAGGGAAAATAGTTGAGACGGAAGCATATTTATATAACGATCCCGCCTGCCACTCATATAGCAATAGGACAAAGAGAAATTCAATGATGTACGCACAAGCAGGTACTAGTTATGTATACTTTACTTATGGAATGCATTATTGTTTTAATGTGGTAACAGCAGATGTCGGTATAGGTGAAGCTATACTTATAAGAGCGCTAGAACCAATAGCTGGGATTGAACAAATGCAGCTTAATAGATCAAAAACTAAGTTAATGGATTTATGTTCAGGTCCAGCAAAATTAACCCAAGCACTAAAT…
FTT0667	FLH156518.01X	FtCD00020987	AY774246		hypothetical protein	ATGTCTAAATTATTAGTTGTTATCAACATGCAAAAAGGTTTTGATTGCTCTGAGGCTAGAGCTGTAATACCAAATCTTAATAAATTTTATACCTATTTTGATAATGTTAGTTTTGTGATGTTTGAAAATAGGAAGAATTCACTTTTTGAAACTCAATTAAAATGGATTGATTTTCAAAATGAAGAAGATAGAAAGCTTATTGAAGGTGTAGAGATACCACAAAATGCGCATTTTACTCATCACCATAACTATACGGTATACAATGATGAGCTTAAAGCTTTAATAAAAAAACTTAAACCAGCAAAAGTCTATCTTTCTGGTCTATTCTCAGATGTTTGTTTATTAAAAACAGCTATGGATATGTTTGATGATGGGATTGTCCCTTATATTATCAAAGAT…
FTT0668	FLH156625.01X	FtCD00021005	DQ681802		nicotinamide mononucleotide transport (NMT) family protein	ATGGATAGTATATATCAATCAATAGTATCATCATTTTATGACTATCAGTCGTATTTTGAATTAGTTGCTGCTGCAACTGGGGTAGCTGGAGTATATTTTTCATACAAGAGAAATATTCTAGTATATATTGTCAGTTTTATATCATCAGCGATATATGTATGTTTGCTATATGATTGGAAACTTTTTGGCGATATGTTACTGAATTTCTATTATCTGATAGCAAATGTCATCGGTTTTTTTGCTTGGATAAAACACTTTGAAGGTGATAGTAAGATTCATGTTTATGTAACAAAAGCAGATACTCATCAGAAGAAAGTTTCTTTATATATATTTATAATTACTTTTGTTCTTACCCCATTTATTTATGCACTCCAAAAACAAACTTCTATTATAGATTTA…
FTT0669	FLH156588.01X	FtCD00021000	AY774241		Sodium/hydrogen exchanger family protein	ATGCACGACGAGTCTTTGATTTCCATTTTCGTTTTTGTAATGCTGGGCATTCTAGTAGTTACAATAGTCCTAAAAAAACTAAAACAACCATATGTTGTAGCATATTTATTGACAGGAATATTATTAGGACCGTATGGATTAAGATTGATTCAAGATCAAGAGAATCTTGCAAGGTTAGGTGAAATAGGGGTTATCCTATTATTATTTTTTGCAGGGATGGAAGTCTCACCACGTAAATTTGCTGAAAACTGGCAAGTTCCGACTATTGGTACAATGCTGCAAATGCTAATAACAAGTCTAATAGTTTCTATAATTGGAGTAGCATTAGGATGGAGTATTGCAAAGATATTACTTTTTGGAGCGGTTATTAGCTTAAGTAGTACAGCTGTTGTGCTTAAA…
FTT0670c	FLH204568.01X	FtCD00022822	DQ681803		hypothetical membrane protein	ATGCCTTTATATAATGAAATGCTTTTCAACATAATATCAACGTTTATCAATATAGTATTAATAACTATAGTCGCTAGCTTAGCTTTTTACTTACTAAAAAAACGCGCAACATCTACTAAACAAATCAAAAAAATTAAATCGCGAGTAATTTATTTAAGTATAATTATTTTTTTCCTAGTTGTTATAAAAATTTGGCTTGGTGGAATAACTAACTTATTTACGATGTTAAGTTTAGTTGCAGCTGGTCTGATAATCGTTAATAAAGAAACTGTTATGAATTTTGTTGGTTGGATTATCATCAATTGGCGCAGCCTATTTTCTGAGGGTGACTATATTGAGGTACAAAATTATCATGGCTATGTTAGTAAGATAAAAGTATTTTATTTTAGGATGTATGAA…
FTT0671	FLH156641.01X	FtCD00021007	AY774268		major facilitator superfamily (MFS) transport protein	ATGAGGTCTACAAATTATAGTCTAGTCATAGGTTGGAGTATTTGGTGTATTGCTGCAATTTTTTATGGGTTAGATTATTTTCAACATACTACTGCACCAAGTGTTTTAGTTAAGCCAATAGCCGCAACTATGCAGGTAGGAATAGAAGATATTGCTTATATTATGAGTATATATTTTCCTATTTATGCAATATCACAAGTTCCAGCTGGAATTCTACTTGATAAGTACGGCTCAAAAATAATGTTATCAATTTCATGCTTAGTTATGAGTTTAGGCATATTACTGTTTAGTTATGATCCAAATTTAGTAACAATGTTTATCGGTAGAATACTTATAGCTGCAGTAGCTTTTATTGGCACACTGAAAGTGGCTGCTGATGTCTTACCTGAAAGAGCATTT…
FTT0673c	FLH204563.01X	FtCD00022819	DQ681804		hypothetical protein	ATGAAATTTAAAATTTTTGATAATACCTTTCAGCCTGGAGAAATGGCTACATTAGCAATGCCATTACCTAGCCAATATTCTTGTGCTCCAATGTATCTGCCAACAAAGATTCTTAATGGTGTTAATGAGGGTCCATGTATATTAATTTTTGGTATGGTTAATGGTGATGAATTTAACAGTATCGAAATTATCAACTCTCTTTTAGAAAAAACCAATCCTAAACAGTTAAATGGTACAATCGTAGCTATTCCGGTACTAAATGTTTTTGGTTTAGTCCATAGTATCAAGCATAACCCTACTCTAGAACAAGCTTTCCCAGGGGATGAGAATGGCTCATATATGCAACGTTATGCTTATAGAATAACCCAAGAGATTATAAAAAAAGCAAACTATTCTATC…
FTT0674	FLH204557.01X	FtCD00022816	DQ681805	prsA	Ribose-phosphate pyrophosphokinase	ATGTCAGAAGATTTGATGATTTTTAGCGGTAATGCTTCTAAAAAGCTTGCTAGTGAAGTAGCTAAAGAGCTAGGTGCAACTCTTGGTAATGCAACGGTTGATAGGTTTAAAGATGGCGAAATACATGTTGTCCTAAACGAGAATGTGCGTGGTAAGGATGTATTTGTAATCCAATCAACTTGTCCACCATCTGATAATTTGATGGAACTTATTCTATTAATAGATGCGCTTAAAAGATCATCAGCAGAGAGGGTAACAGCAGTATTACCATATTTTGGCTATGCTAGGCAAGATAGAAGATCAAAATCAGCGAGAGTGCCTATATCTGCTAAAGTTGTCGCAAATCTTCTTCAAGCTGTTGGCTTAGATAGGATATTATCAGTAGATATTCATGCTGAG…
FTT0675	FLH156418.01X	FtCD00020974	DQ681806	rplY	50S ribosomal protein L25	GTGGCAAATTTTGTTCTTAAAGCTGAAAAGAGAGAAGACTTAGGTACTGGTGCGAGCCGCCGTCTAAGAAGAGCTGGTAAAATCCCAGCTGTTATATATGGTGGTGAAAAAGAAGCGGTATCTGTATTACTTGATCATGATAAAGTACTACACTCAACAGAAGACAAAGCGTTTTTCTCAAGTGAGATAACTTTGGATATCGATGGTAAACAAGAAAAAGTAATTATCAAAGCATTACAAAGACATCCATATAAAGTTAAGCTTATCCACGCTGACTTCATGAGAGTATAG
FTT0676	FLH156636.01X	FtCD00021006	AY774264		conserved hypothetical membrane protein	ATGAGTACTTATACTGGTGTTATTATCATATTTATACTTATTTGGATATCTGCTTTTTTCTCAAGCTCTGAGACAGCGATGATAGCATTAAATAAATATAAACTTAAACATTTAGCCAAAAAAAATCATCGTGCCGCAAAGAGAAGCTTATCTTTAGTACGCAACCCAGAGAGATTACTAGTTGCTATTCTTATTGGTAATACTTTTGCAAATATCTTTGCTGGAACTGTGATTTCCTCATACTCTGAGGATCATTTCGGTGATTTAGGATTGCTTATTGCAACTATAGTTGTAACTATATTGGTTTTGGTTTTTGGTGAGATAATTCCTAAATCTTTCGCAGCTATTTACCCACAAAGGTTAGCCTTTCCTTTTTCTTTGCCATTAAAAATAATCATG…
FTT0677c	FLH204616.01X	FtCD00039255	DQ681807		hypothetical protein	ATGAAAAAAGAAAATATAGACATAATCTCCAAACAGTTTGGTAATTCTGCAAACGATTACTTATTAAGTAAAGATCACTCTACAGGTAATGATTTAGAAAAACTGGCAAATTTTTTAGATTCTCAGAGTAAGATCATCAATCAAAGTATAGATATAGGATGTGGTGCAGGTCATATTAGTTATATACTTAGTCGATATTCAGAACAGGTTTATGCCTTTGATTTATTAGCTGAAATGCTTGAAGTAGTTAAAAATGAAGCTCATAATAGGCAATTAAAAAATATTGAAATTAAACAAGGAAATATAGAATCTATACCTTTTAATGATAACTCATTTGATCTAGCAATAAGTAGATTTAGTGCTCATCATTGGGATGATGTCTTAAAAGGTATTAAAGAA…
FTT0678c	FLH151449.01X	FtCD00020452	DQ681808		hypothetical lipoprotein	ATGTCTAAAATAATTAATAATGGTCTTATATGGTTATCAGTGCTAAGTATAGTTGGTTGTAATACTTCATTTACTTATCCTAATTATCAACTAAGTGGTACATACTACAATCCAGACTATAATAAAGATGACTTAATTCATGGCTACTTTCAACAAAGTGTTGAACAGATGGAAACTAGCCCATATACCTATCAAGGTCAATATTATGAAGAAACTGGATTTACTCAACCAAATCCATTTATGCAAAATATTAATTGGAATAGAATGAATGTTTAG
FTT0679c	FLH156542.01X	FtCD00020992	DQ681809		GTP-binding protein	ATGGGATTTAAATGTGGTATAGTAGGTTTACCAAATGTTGGCAAATCAACTCTTTTTAATGCTCTTACAGAAGCAGGAATTGATGCAGAAAATTACCCTTTTTGTACAATTGATCCAAATGTTGGGATCGTTTCAGTACCAGATCAAAGACTTAATGAATTAGCAAAAATTGTTAAGCCAGAAAGAATAATAACGACAACAATGGAGTTTGTAGATATTGCTGGACTTGTCACTGGAGCAAGTAAAGGCGAAGGCTTAGGTAATAAATTCCTTGCAAATATTCGTGAAACAGATGCTATAGCTCATGTTGTAAGATGCTTTGAAGATGACAATATAATTCATGTTAGTGGTAAAGTTGATCCTATAGATGATATTAATACTATCAATATGGAGCTAATC…
FTT0680c	FLH156577.01X	FtCD00020998	AY774127	pth	Peptidyl-tRNA hydrolase	ATGCCTAAAATAAAAATGATTATTGGCCTAGGTAATATAGGCAAAGAATATCAAGATACGCGCCATAATGTTGGTGAATGGTTTATTGCTAAAATAGCTCAAGATAACAATCAAAGCTTTAGTTCTAATCCTAAGCTTAATTGTAATCTAGCTAAAGTTAGCATTGATTATAATAATGTAGTACTAGTATTTCCTACAACTTATATGAATAACAGCGGTTTAGCTGTTAGCAAAGTCGCTAATTTTTATAAAATCGCGCCAGCAGAGATACTTGTAGTACATGATGAGCTAGATATAGATTCTGGAGAAATACGTCTAAAAAAAGGCGGAGGTCATGGTGGTCATAACGGTCTAAGAAGTATTAACCAACACTTAGGCACTAATGACTACCTACGCCTT…
FTT0681c	FLH156460.01X	FtCD00020980	DQ681810	blaA	Beta-lactamase class A	ATGAAAAAAATAATTACGCTGATAATTGGTATAATATTTATAACTTTTAGTTTTGCTACTACAAAAATAGATACCCAAGTTACCAATGATATTCAAAATATAGAAAAAAAACATGGTGGTAAAATTGGTGTATATACTATAAATCGAAATGACTGGAGTAATTTTGCAGTCAATGCTAGCTTCTACTTTCCAATATGTAGTACTTATAAATTTCTTGTAGTTGGTGCAATACTTAAACAAAGTATGACTGATAATAAACTACTTAATCAAAAAATCAAAATCTCAAAAAATCAAATTGTTGAGTATTCCCCTATTACAAGAAGGCATATTAATCAAATAATGACTGTGAAACAACTTTGCCAAGCATCTATGCAAGGGGATAATACTGCGACAAATATC…
FTT0682c	FLH156406.01X	FtCD00020973	DQ681811		hypothetical protein	ATGCAAAAAAAAAGCTTCTCTATTCTAGTTTTATTTGTTGTTATACTATTAGTTGTACTGTATATTTTTAGTACTACTAATCTTAATAAAATCTCACCAGATAACAAACAAGGCTTATACCTTGTTGAGCATGCCTTTCCACAATATAAGGTTATAAAGACTTTTGACACAGGTATCCATCTACAAGCATATATTCTAGAAGACAAAAAAGATCCAACAAAACATAGTGTTACTTTTACTAGTGAAGATGGTGCTGTAATTGTTAATGGTGAACTTTTAGCATGGGATAGTAATCAAAACAAGCTAACTAGTTTAAATAATATTTATGCAAACTATTTCACTTCATCACCTCAAGCGAACAATCTTTATCTAAACATCAAAAAGTATGCTACATACATC…
FTT0683c	FLH156387.01X	FtCD00020971	AY774123	pilD	Type IV pili leader peptidase and methylase.	ATGTACTACGATATCTATATAATTTACTTGTTTATATTTCTATTTGGTGCTGCTATTGGCAGTTTTTTGAATGTTGTTATATATCGAGTGCCAAATAAACTATTTGCTGATGAGCAAGCTATTGCACGAGAAATACTGGGGATTGATAAGCAACAATCTCCACAGAATTTTAGTTTATTGACACCATCAAAATGCCCAAAATGTCATAATAAACTAAAGTATCGTCATAATATTCCGATAATCGGATGGTTTTTGCTTAAAGGCAAATGCTTTTTCTGTAAAGAAAAAATATCTTTTGAATACCCATTAATAGAGTTTATCACAGCTAGTTTATTTATAACTATTTTTTACTGTTTTGGTTTTACATTTCAGAGTTTAGCTCTAGTAACTTTGGCTAGC…
FTT0684c	FLH231448.01X	FtCD00039357	DQ681812	sthA	soluble pyridine nucleotide transhydrogenase	ATGTGGAGTAAAACCATGGAATATAATTACGATATTATTATTATAGGCAGTGGTCCTGGTGGTGAAGGGGCTGCGATGAAAGCAACTAGGAACGGACAAAAAGTAGCTATCATCGAAGATGACGCTATTGGTGGTGGTTGTAATAACTGGGGAACAATTCCAAGTAAAGCTCTAAGACAGCTATCACGTGAAGTTTGGCACAACAAGAAGAATTTCGATTTCCCAGAGATGCTTGATACTGCTTATGAAATAGTTATCAAACAAAGAGAGATTAAGAGAAATCGTTTCGCTAATAATGAAATTGATGTTTTCTATGGTTTTGCTAGTTTTATCGACAAGCATAAAATAAAAATTTCACGTAAAAATGGTTCAACTGAAATCATTACGGCAAAAAAATTC…
FTT0685c	FLH156507.01X	FtCD00020986	DQ681813		potassium channel protein	ATGACTATTAGAGAAAAATACTCAAATTATATACCTCTTTTTGTATCTGTTACAATGACGCTAAATGGTATTATTACCATACTAGCTGTTGCAATACCTATTATTAACAAGATCTTTTCGATAAATATTAATGCTGAGATACCTTCTGATGTTTATAGCATCAGCATGAAATATAACTCTGGACTTGGAGTTATAATACCTTTAGTACTTGGTTACTTTATGATAATAATCGCTAAAGGTATTTATCAACGTAAAAGAACATTTTGGTTTTTAGCAGTTATATTTATTAGTTTATCTATGATTGGTGATTACATCCAGGATAAACATATAGCATATAAAATAACATTTATAACTCATGCTTTAGAAATTATTTTACTGTTTTATTTTAGAAAAGCTTTT…
FTT0686c	FLH156649.01X	FtCD00021009	AY774273		Proton-dependent oligopeptide transport (POT) family protein	ATGGGAGTATTTGTCGCCTTTAATTATGGCTTACATATATTAGGTGGCTATATTGGTGGGCGCTTAATAAGTTATCGAGTGCTATTTTTATTAGGAATGGTATTACAAATATTTGCTTGTTTATTTTTAGCATTTCCATCAACAGAACATCTTTATATAGCTTTAGCACTATTTTTAACAGGGTGCAGTTTAAATGTTCCTTGTATAAATATGATGTTAACTCAGCAATTTGAGAATAATGATGGTGATAGAGAAAGTGCATTTTTCTGGAATTATGCTGGTATGAATATCGGCTTTTTTATCGGTTTTACAATTGCTGGAATATATCAAGGCAAACAAAGTTATAATACCTTATTTCTTATAACAACTATTACCAAAATTATTGCTTTTTTACTCTTA…
FTT0687c	FLH204605.01X	FtCD00022849	DQ681814	hslU	ATP-dependent protease, ATP-binding subunit	ATGACACAAATAATGACTCCAAAAACAATCGTACATGAATTAGAAAGACACATAATTGGTCAAAACGATGCTAAAAAAGCAGTTGCTATTGCTTTGCGTAATAGATGGCGCAGAATGCAACTTGACAATGAAATGCGTCAAGAAGTAACTCCTAAGAACATTCTTATGATTGGTCCAACAGGTGTGGGTAAAACAGAAATTGCGCGTAGATTAGCAAAATTAGCAGATGCTCCATTTATCAAAGTAGAAGCAACTAAATTTACAGAAGTTGGTTATGTAGGCAAGGATGTTGAATCTATTATCCGTGATTTAGTTGAAACAGCTGTCAAAATGAAGCGTGAGGAAGCTAAAGAAAAAGTCACAGAAAAGGCTGCTAGATTAGCCGAAGATAGAATTTTA…
FTT0688c	FLH156554.01X	FtCD00020994	AY774267	hslV	ATP-dependent protease, proteasome-related peptidase subunit	TTGGAAGCAATTAAAGGAACTACTATTCTATGCGTTAGAAAAGGTGACAAAGTAGTAATCGGTGGTGATGGTCAAGCCACATTAGGACATACAATAGCAAAAGAAAATATCATAAAAGTTAGAAAATTAAATGGTGGTAAAGTTCTAACAGGTTTTGCTGGTTCAACTGCTGATGCATTTACATTATTTGAAAAATTTGAACAAAAACTAGAATTTTATCAGGGCAATCTTGAAAGAGCTGCTGTTGAGATGGTACGTGAATGGCGTCTAGATAGAATGCTAAGTAAACTTGAAGCTATGATTATCGTTGCTAATGAAAAGCTTTCTCTACTAATATCAGGGGCTGGTGATGTAATGGCAGCTGATAAAAATGATATTATCTCGATTGGCTCAGGTTCA…
FTT0689	FLH204614.01X	FtCD00039254	DQ681815		hypothetical membrane protein	ATGAGTAATTTAAATTTTAAAGGAACTATTTCGCTAGCAGCAACTATATACAAGAGAGCTTTTAAGATAACTTTTGCATTAGCTTTTATGCTTTCATTTATCTCTGAGTTTTGTTTTGTTTATCTGATGAACCATGGTATGGATAAGTTTATCCAAAGTAATGGTGAAGCTGATGTTTCTCAGTTACCATCGGGAAATATTTTAGCAGCTATGTTTTTGATAATTATGGTTGCGACAATATTTGTTTATGCGATGATAATTATTTTACAAGGAATTATGATCAAGCATGAGCTGAAAGTATCTGATGCACTAAAAATAGCTCTACAGATATTTTCGAAAAGAGTGTTTGCATTTCTTGGAGCATTTTTACTTTCAATGATTGCGATGACATTATTTACA…
FTT0690c	FLH204549.01X	FtCD00039246	DQ681816	lplA	Lipoate-protein ligase A	ATGCATATATACATATCTCAAAGTAACGATATCTATTTTAATTTAGCTTTTGAAAATTGGTTATTCTTGGAGAAGCTGCATCAACAAAAAATTTTATTCTTGTGGCAGAATTCTCCTTGCGTTGTTATTGGTAGAGCCCAAAATCCTTGGCTTGAGTGCAATCTTGAAGCTATGGATAATGATAAAATACCAATGATTCGTCGTCAAAGTGGTGGCGGTACGGTTTATCATGATTATGGTAATCTTAATTACACTATTATCAGCACTAAAAAAGATCATGATATCAAAGCAAATTTAGAACTAGTTTGTAATGCTATTAAAAAACTAGGCATTGATGTATATCCCAACCGAAGAAATGATATTGTTCTTGATCATCACAACTATACATATAAAATATCA…
FTT0691	FLH204577.01X	FtCD00022829	DQ681817	tyrS	Tyrosyl-tRNA synthetase	ATGTCGAGCATAAAAGAGACTTTAGAAATTATCAAAAGAGGGGCGGATGAGGTCCTAATCGAAGAAGAATTAATCAAAAAATTACAAAAACATAAGCCATTAATAATTAAATTTGGTTGCGACCCAACTGCTCCAGATATTCATTTGGGACATACTGTAGTTATCAATAAGCTAAAGCAATTACAAGATTTGGGACATAAAATTCACTTTTTGATCGGGGATTTTACAGCTCAGATAGGTGATCCTACAGGTAAAAATGCAACAAGACCGCCATTAACTGCCGAAGAAGTTGCGGCAAATGCTGAAACTTATACTAAGCAAGTATTTAAGATTCTTGATAAAGACAAAACTATTATTCGTCGTAATGGTGATTGGTTTAACAAAATGTCTGCTAGTGAG…
FTT0693c	FLH156127.01X	FtCD00020943	DQ681818	mutM	Formamidopyrimidine-DNA glycosylase	ATGCCTGAACTTCCTGAAGTAGAAACAGTAAAAAGAGGCTTAATTAAAACTATTATCGATAAAAAGATATTTGATATTGAGATTAATACCGATAAGCTTCGCTACCCTATTGATAAAGACCAATTAGTAAAAATTAAAAATAAAGTAGTCAAAGAAATACAACGCAGAGGTAAGCATTTAATAATTTTCATTGAAGATGATTTACAATTAATTATTCACTTAGGCATGTCTGGAATTATTAAAGTTATAGACTCGACAAACTACAATAAAATCAAACATGATCACATCGTTGTAACGCTATCAGATAATCTATCTTTAGTTTACAATGATCCACGTAAATTTGGTTATTGGTTAGTAAATACTAATCACACACCTCTTGAACATAGAGTTTTAGTATCA…
FTT0694	FLH230027.01X	FtCD00039274	DQ681819		hypothetical protein	ATGCGTTTAAAAAAGCTTAAATCTTCAATACATAAAAGACTAAATCAGCGTTATATATATGATTGTAATAAAAACATAAATTTTGCAAACTTTAAAAATGGCTCAATAATTGTTGCTAATGATACCACTATAGTTACAGTATTAGCATTAAAAACTTACCTTGAAGATAAGTATATTACCGTTTTAGGGGCTTTTGATGATAGGGCTAAAGGTCTAGAGAAGGTTATGGGTAGGATTGGTATTAAGTATATCGATCATATTAGCTTTTGGGATCATCAGGGCGTACTACTAGTCAATAAAAATTTAACATCTCAAGTTGAGCAGAGCGAAAATAGGTTTATATTATTTATATGTGGACCAGAAATGCCATACTTTTCACAACGAAGAAATTTAGACAGA…
FTT0695	FLH156183.01X	FtCD00020949	AY774972	mraW	S-adenosyl-methyltransferase	ATGCATTATTCAGTATTGTTGCCAGAGTCTATTAATGATTTAAATATTAATCCTCAAGGTATTTATATCCATGCCACCTTTGGTAGAGGTGGACATTCCAAAGCTATTTTAAATAGGCTTACTACAGGGCGTTTGATAGCTTTTGATAAGGATCTTGATGCTATCAGTTATGCTAGGGAAAATTTCCAGTTTAGTAATTTTGAGATAGTTCACGCAAGTTTTGCTAGTATTTATGACTACTGTTTACAACATAGTCTGCTTGGTAAAATTGATGGTATAATTATGGATCTTGGGGTTTCTTCACCGCAACTAGATAATGCTGCTAGGGGTTTTAGTTTTACGCATAATGGACCACTAGATATGCGCATGGACGTTTCTAAAGGTATTACAGCTAGCCAA…
FTT0696	FLH231436.01X	FtCD00039351	DQ681820		hypothetical protein	ATGATGTTAACAAATCGTCAAATAAGGGTAAGATTATTTGAATCACTTAAAAATAGTTTCTTTAAAAAAACAGTTGGTATTTCTTTTGCATTATTATTTATATTGCTTATTACTGCATTTAGTCTTATAGTTGTGCGTTTTGAATATAAATTACAATTAAATGAGCAAAAAAACCTAATTCTTGAGGATACTCGTTTAGATGAACAATGGAGTCAGATTGTATTAGAATATAGTTCTTTAGCAACTCCTACAGCTGTGGAGAAGTTTGCTCAAAAAGAAAAAATGACCTTGCCAACACGTAAAACAATAGGCTTTTTGAATGAGCAAAAAGAGGAGTTAAATAATGAGTAG
FTT0697	FLH204627.01X	FtCD00039257	DQ681821	ftsI	penicillin binding protein (peptidoglycan synthetase)	ATGAGTAGTTATCGACCAAAACTCCGGCACTTTGTTGTAATTATTTTACTGTTGCTAAGTTTTATTGTTTTATTTATAAAGCTTATTTATATGGAAACTATCCAATATCCTAAGCTTAAGCAAGAAGGCGATAATCGTAGTGATAGAAGTATAGATATAAAAGCATACAGAGGTATAATCCTCGATAGAAACGGTAATCCTTTGGCGATAAGTACACCTGTTGATACAATTTGGGTTGATCCTTTTTATATTAGCGCGGATAGTCCTGAATTAAATAAAGTCATGAATATTTTAAATCTACCTGAAAAAACTAGAGAAAAGATAAAAAGTCAAGTTAAGGTTAGAGAAGGAAGAAGTGGTTTTGTCTACATTGAGAGAAAGGTTCAACCATATTTATCA…
FTT0698	FLH156148.01X	FtCD00020945	DQ681822	rpsO	30S ribosomal protein S15	ATGTTAACAGCTCAAGATAAGCAAAAAATAATTAAAGAAAATCAATTAGCAGAAAGTGATACTGGATCGCCAGAAGTGCAAGTAGCTCTTTTAACTGCTAGAATCAATGATTTACAAGGTCATTTTGAGGCTCATAAAAAAGATAATCACTCAAGAAGAGGTCTTTTAAGATTAGTAAGTCAACGTCGTAAGTTATTAGATTATCTACATGATAAAGATGTTGAAAGATACCGTAGTCTAATCAAGAAATTAAATATACGTAGATAG
FTT0699	FLH230020.01X	FtCD00039272	DQ681823	pnp	polyribonucleotide nucleotidyltransferase	ATGAAAATATTTAGAGAAGTTTTTGAACTAGGTAACAAAGAAATAATTCTTGAAACAGGTGGTATGGCACGTCAAGCAGATGGGTCAGTGACTGTAAGTTGTGGGAATAATGTTGTATTGGTGACAACAGTAGTTAAAAAATCAGTAGCTGATGGTACTGACTTTTTTCCTTTATCTGTGCATTATTTAGAGAAAACTTACGCTGCTGGTAAAATACCGGGTGGTTTCTTAAGAAGAGAGGGAAGACCTTCAGAAGAACAAATTCTTATTTCTAGGCTAATAGACAGATCTATAAGACCATCATTTCCAGATGGGTTTTTTAACGAAATTCAAATCGTTGCTACAGTTTTATCTTATGATGGTGCTTTTTCACCTGATATACTAGCTTTAATAGGTGCT…
FTT0700	FLH155782.01X	FtCD00020901	AY774208		hypothetical protein	GTGAGTGAAGTAGTTCAAAGCGTTGATCCGATAAACTTTACAGAAGCCGCTTCTTTAAAGGTTAAAGAACTAATTGAAGAGGAGGGTGATAATTCTCTTAGCCTTAGAGTATACATCACCGGTGGGGGCTGTTCTGGGTTTCAATATGCTTTTGCTTTTGATAATGAAGTAAAAGAAGATGATATGGTTATTACTAAAAATGGTGTTCGCCTTTTGGTAGATTCTATGAGTTTTCAGTACTTGGTTGGTGCTGATGTTGACTACAAAGATGATGTCGAAGGTGCATACTTTGTAATTAGAAATCCAAATGCGAAAACTACTTGTGGCTGTGGTTCATCTTTTTCTGTATAG
FTT0701	FLH204545.01X	FtCD00022810	DQ681824	kdsA	2-dehydro-3-deoxyphosphooctonate aldolase	ATGTATTTAAATAAAAATCTTATGAAAATTGCTAATTTTGAAGTAGGAAATGGTAAGCCATTTTTCTTAATGTCTGGTCCTTGTGTCATTGAATCTGAGCAAATGGCGATGGATACTGCTGGATATCTTGCTGAGGTAACTAAGGATCTTGGAATAAATTTTGTTTATAAGTCATCTTTTGATAAAGCAAATCGCTCATCTATAAATAGCTTTAGAGGGCTAGGTGTAGATAAAGGTCTTGAAATTTTGGCTAAGGTCAAAAAGACTTATAATGTGCCTGTCGTTACAGATGTCCATGAAGATACACCCTTTGCTGAGGTTGCTGAAGTTGTTGATGTATTACAAACTCCTGCTTTTTTATGCCGTCAAACAAACTTTATTCTTGAGGTCTGTAAGCAA…
FTT0702	FLH155714.01X	FtCD00020893	AY774227	udk	uridine kinase	ATGGCTGGTAAAGGCGATGTTTTTATAATAGGTATAGTTGGTGGTTCTGGTTCTGGTAAAACATTATTTTCAAATGCTATCATCAAAAAATTAAAATCAAAACATTTAAACAAAATTGCTGTAATTTCTGAGGATAGATATTATAAAAATTGGGGTGAGATGGTTGGCTTTGAAGAGGCTTGTAAAATCAACTATGATCATCCTGATGCTTTTGATCATAAATTGTTAAGAAAAGATTTAAACAATTTAGTTCAAGGTAATGATATCTATATTCCTCATTATGATTACACTACTCATTCAAGGGTTGAAGAAAAAGCAGAAAAAATTACTGGCGGTGTAAGTGTAATTATATTAGAAGGAATTATGCTATTTAATGATCGTAAGTTATTAAAGATGATG…
FTT0703	FLH204550.01X	FtCD00022813	DQ681825	rpoZ	DNA-directed RNA polymerase omega subunit	ATGGCTAGAGTAACAGTAGAAGATTGCTTAGATAAAGTAGAAACAAGATTTGATTTAGTAGTTTTAGCTTCTATGCGAGCAAATAAGATACTAAAAAATGGCTACTCTGAATCTATGGAAAATGAGAAAAAAGAAAAAGCAACGGTTGTGGCTTTAAGAGAAATTGCTGAGTCAGAAATTACCCCAGAACAAATTTTAAGAAATGAGATAGAAGGATAG
FTT0704	FLH155644.01X	FtCD00020886	DQ681826		hypothetical protein	ATGAAAGCAAAGTTTATAATAGCTTCATTATTTTTATCAGCAGGCGTTTGCTCTATATCCTATGCAGATACAGTAGATAGTACTTCGATATGCCCAACTGATTTGAAATATAAAACTATAGGTATGAGAGATATGTCTTTTAGGTATGCGCAATATAAAGATCATATTTGTGCTATTTTAGAAGTTGATCTTAATAAAAATAAACAATGGCGCGAAAAAGGTAGTGGTTGGTTTGCTGCTGGTTTTGGAGCTAAGACAATGAAGGGGTCAAATATGTTTATATTTGTGCCAAATAAATCTCAGTCTCAAGATATACGCTATGATATTTTTGCAAATATTGGTGGAGCATATGGTCCTACTAAACCTTTAGATACTAAACCACAAAAAGGACAAATAGAG…
FTT0705	FLH155960.01X	FtCD00020925	AY774203	rumA	23S rRNA (Uracil-5-)-methyltransferase	TTGGGAAGTTCTAGACATCATAATAAGCTAAAAGAGGGAATCTTTGAGGCTGAAATTACAGCATTAAGTCATGATGGTAGAGGTATTGCAAAAGTTGATGGTAAAACTACTTTTATACCTTTCACATTACCTGGCGAAGTAGTTAAATTTGAATATACATTCACAAAAGCAAAATTCGATGAAGCAAAAGTAGTTGAGTATGTTAAAAAATCATCAAATAGAGTTAATCCGCCTTGTGACCATTTTCAAATATGTAGAGGTTGTAGCTTACAACATATGTCTACAGATGCACAGATCGAGCATAAGCAACAAACTTTAATTAATCAATTAAAATATATTGGTAATGGTGTTGAGCCAGAGAATATTTTACCACCACTACGCACGAGTAATACTGAAGGA…
FTT0707	FLH204628.01X	FtCD00022858	DQ681827		nicotinamide mononucleotide transport (NMT) family protein	ATGCTGGTTAATCTATTTAGGATATATTGTATGAATATTCAAGTTATTAATGATTTTTTTTCGCAACTAGCAAATTATTTTCGAGGATTTAAAAATATAAAGCTTTCGAATATTTTTAATGATTGGAATATTTTTGAAATATTGTGGCTAGTGATTTCTGTAACTAGTCTAGGAATTATAAGTATTTTAACAACAAATGATTATTTAGTTATTACAACTATAGCTACCGTTACTGGTATGCTAAATATTTTATTATTAGCTAAAGGTAAAATTCTTAATTATTTTTTTGCATTTATTAATAACCTTACTTATGCATATGTTTGCTATAATCAAGGTATTTATGGCCAATTTTTACTCTTTACCTTTTTCTTTTTTCCTATGCAGTTTTATGGTTTATAC…
FTT0708	FLH204587.01X	FtCD00022838	DQ681828		major facilitator superfamily (MFS) transport protein	ATGGAGGTTAGAGCTATGACCGTTAGACAGACTTTACTTATTATTATCACACCAATAATTGCGATGTGTGTATTATCATTTGGCAATGGTTTTTTTACTACCTATTCGTCTATTGAATTAAATGATCTTGGTCGCTCTAGTTTAATGATCGGTATAATTTCAGCAGCATATTTTTTTGGTATGACTGCAGGATCTTATTTTTCACAGTTTACTATAATCCGAGTAGGTTATATAAGAGCTTTTGTGCTATTTGCATCTCTTATGGCTATCAGTACTCTGATAGTTGGTGCAAATAAGAGTGTCGCTGTTTGGATATTATTTAGATTTCTCTGTGGTTACTCATTAGCGGCTTTATTTATCATTATTGAAAGCTGGTGTATATTATCATCAGATAAGAAA…
FTT0709	FLH204607.01X	FtCD00022851	DQ681829	eno	Enolase (2-phosphoglycerate dehydratase)	ATGTCGTCACAAATAAAACAAGTTTTTGCCAGACAGATATTAGATTCGCGTGGTAATCCTACAATTGAAGTAGAAGTGGTTTTGGAAAGTGGTGCTTTTGGTCGTGCTGCTGTACCTTCTGGTGCTTCTACCGGAATTAGAGAAGCTCTAGAGTTAAGAGATGGTAACAAAGCCCTTTTTCTAGGTAAGAGTGTATATAAAGCTGTTGAGAATGTTAATACTAAGATAGCTCAAGCAGTCAAAGGTTTAGATGCATTAGATCAAAGGTTAATTGATAAGACTATGATTGAACTAGATGGTTCTGAGAATAAGAAAAATCTAGGTGCAAATGCAATTTTAGGTGTTTCACTAGCTACTGCTAGAGCTGCTGCATCACATCTTAGAAAACCTTTTTACCGT…
FTT0710	FLH204552.01X	FtCD00039247	DQ681830	ftsB	cell division protein	ATGGATATCAAATCTAACTCTTTTTTTTATATTTTCATTTCTGTAGTTTTATTACTAATAGCAATATTGCAATATGATCTGTGGTTTAGTAATACAGGCTTTATTAAGTATCAAGCACTAAAAAAATCTGTAATTAGCCAGCAAAAAGAAGTAAAGCATAAATCTCAGACTAATGTACAATTATATTCTGAAGTGGTTTCACTACGTCAAAATAGTGAGGTGCTTGAAAGCTTAGCTCGTGAGAATATGGGCCTAATCAAGCAAGGAGAGGTTTTTTATAGTGTCAAATAG
FTT0711	FLH204602.01X	FtCD00022848	DQ681831	ispD	2-C-methyl-D-erythritol 4-phosphate cytidylyltransferase	ATGTCAAATAAATACGTAATTATTCCAGCTGCTGGAATAGGTACTAGGATGCAGTTAGATATTCCTAAACAATACTATAAACTTAATAATGGTAAGACTATCCTTGATAATACCTTAGTAAAGTTTATTGATAATCCTTTGTTTGATAAGATCTTTGTTGCAATTGCTGCTAGTGATAATTTTTGGAATAATTCGTTATATTATAATCATGACAAAATAGTAGTTTGTAATGGTGGAGAGACTAGATTTAATAGTGTTTATAATGCGCTAAAGGTCATTGATGAACGCAAAAATGATGATTGGGTTTTTGTCCATGATGCTGCCAGACCTTGTGTTAGTATTGATAGTATTATAGATTTGTATGAGCAGACTAAATCATCACACTCACAAGCAGGTATA…
FTT0712c	FLH204591.01X	FtCD00022841	DQ681832	sdaC1	serine transporter	ATGAAAAAACCAGATTACTCAAATACTACAAAAGTCGATATCCAGTGGGTATTTACGTTATTTGGTACTGCAATAGGTGCAGGGTTACTTTATCTACCTGTTCAAGCAGGGGATAGCGGCCTTTGGGCTTTAGTAACAGTACTTATTTTTGCTTTACCTTTAACGTATTACTCACATAAAAATATGTCAAATATTGTACTTTGCACAGATAATGGTGGTATTACAGATGTATTTACCCACAATCTTGGTAGATTTTTTGGTTTAACCTGCGTAGTGCTATATTTCTTTGCAATATTCCTAAATATGCCAATGTACTCTATTGGTCTAAATAGCGAACTAAGTAATTTTCTTTTAAACTACAATATTGTAAAAACCAATTTATCAACACATATATGGTTT…
FTT0713c	FLH204567.01X	FtCD00022821	DQ681833	tdh	L-threonine 3-dehydrogenase	ATGAAAGCATTAGCTAAATTAAAAAAACAACCAGGTATATGGATAATTAATGATGCGCCAATACCAGAATATGGCTACAATGATGTTTTGATTAAAATTAAAAAAACGGCTATTTGTGGTACTGATTTACATATTTATAATTGGGATAAATGGTCGCAAAACACCATTCCAGTTCCAATGATTACCGGACATGAGTTTGCTGGTGAAGTTGTAGCTAAAGGAGATGGTGTTACAAGCGTAGATATCGGCGATAGAGTGTCAGGTGAGGGTCATCTTGTATGTGGGCAATGCCGTAATTGCAGAGCAGGTAAACGTCACCTTTGTAGAAAAACTATAGGTATAGGAGTAAATGTACAGGGTGCATTTGCAGAATATCTAGTTATGCCTGCGGTTAATGTT…
FTT0714c	FLH204583.01X	FtCD00022834	DQ681834	kbl	2-amino-3-ketobutyrate coenzyme A ligase	ATGAATAAAGATTTCTATACAAATATTAATAGTAAAATACTAGAAATTAAACAAGCTGGTACTTATAAGAGTGAGAGAGTTATAGCAACACCCCAAGAACCTATAATTAATTTAGAAAATGGTGAAACATTAATTAATTTCTGTGCCAATAATTATCTTGGTTTTGCCAATAACCCAGAAATAGTTGCCTACGCTAAAGAGCATATTGAAGAATGTGGCTATGGCATGGCTTCAGTAAGGTTTATTTGTGGCACAAATAGTGTCCACAAACAACTAGAAAAAGAGCTGAGCAATTTTTTTGAGTTTGAAGACACTATTTTATACCCTTCATGTTTTGATGCAAATACTGGTCTTTTTGAGACACTTCTTACAAAAGACGATGCTATTATCAGCGACTCT…
FTT0715	FLH230083.01X	FtCD00039290	DQ681835		chitinase family 18 protein	ATGAACAAAACAAAATTAGTCTCAGTAGTATGTGCATTGATGGGTTTGGGATCATATTCACTGCTAGAAGCAGCGCCTGTAAATGATGTTAAAACATATGACTTCAAAGCACCATTTAAGGATTATAATAACAAAATAGTCCTAAGTATCAACAATGTACCATCAGCAAAAGTAGTTGAATTTACAAGTAACTTTAAACCAAAAACTGGTTGGGGTAGTTGTTTTGGTACTCGAGCAGATCTTGTTAATTTTGAAACAACACAACTAAGTAATGGAGAATACCTAACAAAATTATCGCTTAAAGATAGTGAAGGTTCGTTAGATCTAACTCAAACATGTGACATTATGGGTACTGACTCTGGTAATGCACTAGTATTGCCAGGTGTGGTTGTTCCTATC…
FTT0716	FLH204596.01X	FtCD00022845	DQ681836	upp	uracil phosphoribosyltransferase	ATGTTTTGGAGAGTTATGAAAGTAGTAGAAATAAGCCACCCTATGGTCAAACATAAGCTCGGTCTTATGCGTGCGGCATCTATAAGTACACAAGAATTTAGAAGACTAACAAAAGAAATAACAAGCCTTTTAACTTATGAAGTAACAGCAGGCTTTGAGCTTGAGAAAACAGAAATTTTAGGATGGCAAGGCGAAAATATTGAAATTGATCAGATTAAGGGAAAAAAATTAACTGTTGTGCCTATTTTACGCGCAGGTCTTGGAATGATGGATGGTGTTTTTGAGCATGTTCCAGCTGCTAAAGTGAGTATGGTTGGTATGTATCGTGATGAAAAAACAGCAAAGCCCGTAGCTTATTTTGCTAAGCTTTGTGATAAGCTTGATGAGAGAGTTGCTTTG…
FTT0718	FLH155424.01X	FtCD00020867	AY774114		hypothetical protein	ATGCCGCACATAATTTTAGAAATATCACAGCAGTTTGATATTGCTATAGCAAAAAAAGTTATTGATTACTCACAAAAGTTTTTAGTAGATGGTTTACCTACCAGACTCGAAACTTTTAAAAGTAGGGTTTATCGCTATGATTTTAGTAGTGTGGGTGGTGATGATAAGCTAGATCTGATTCATATGCAAATTAAGGTTTTAGCAGAACGAGAACAACAGCATTTAAATAACCTTGCGCTTGAGCTGAAAAATCAGCTTATAGACTTACTAAATGCCTATATTGATATGCTCAGATACAGATTGACATTAGAAATTATCGAGCTTTCACCTGCTTATGCTAATTAG
FTT0719	FLH204585.01X	FtCD00022836	DQ681837		major facilitator superfamily (MFS) transport protein	ATGATGAAAAATTATAATAGGTTGTTATTTTCAACTTTAGGGGCAGCTTTTGAATATTATGATCTAGCAATATATTCTGTATTTGCTGTGACTATTGGGAGTAAGTTTTTTGATAAAAGTAGTTCTATTAGTAATACTTTATTAGTATTTTTGGTTTATATTGTTGGTTATATTGTACGCCCACTTGGTGCTTGGGGATTTAGTTATATTGCTGATAAGAAAGGTAGAGCGTTTATATTACGATTAAATATGATTTTACTATTTTTCTCCACTTTAATATTAGCTTTGTTACCTACTATTGAAAGTATCGGAGTCTTAGCAACTGTTTTATTTGTAGGTTTACGCTGCGTACAGTCATTAGCAGTTGGAGCTGAAATACCTGTTTCAGTAGTATATATA…
FTT0720c	FLH155583.01X	FtCD00020879	AY774104	dgt	deoxyguanosinetriphosphate triphosphohydrolase	ATGGCTATAAGCCTTTATAATGAATATGACTATCTAAGACAAAATAATGATATTTCAAAGAAAGATAATTTTTCTCCTTTCAGAAGGGATTATGCTCGCGTTGTTCACTCTTCATCTTTTCGCAGACTTCAAGCGAAAACTCAAATATTCCCAAGTTTTGAAAATGACTTCTTTAGGAACAGACTTACTCATTCACTTGAAGTAGCTCAAATAGCTAAATCTATAGCTGTTAAACTTAACGCTGAACATGAACTAAATTTAGATTATGACCTAATTGAAACCGCTGCACTTTGTCATGATATTGGTCACCCTCCTTTTGGTCATAATGGTGAAGTTGCTTTGAACAAAAAAATGCGTGAATTCGGTGGATTTGAAAGTAATGCCCAAACTCTAAGATTG…
FTT0721c	FLH153780.01X	FtCD00020684	DQ681838	katG	Peroxidase/catalase	ATGCTAAAGAAAATTGTAACTGCTTTAGGAATGTCTGGAATGCTACTAGCTTCTAGCAATGCTATCGCAGAAGATACCACAACGAAAAATGATAATCTTTCACCACAGAGCGTAGATTTATCACCATTGCGCAATTTAAATAAGCTTGATAGCCCAATGGATAAAGATTATAACTATCATCAAGCTTTCAAAAAACTAGATACTGAACAGCTTAAAAAAGATATGCAAGATCTTTTAACCCAGTCACAAGACTGGTGGCCTGCTGATTTTGGCAATTATGGTCCTTTCTTTATTAGACTATCGTGGCATGATGCTGGTACATACAGAATATATGATGGCAGAGGAGGCGCTAATCGTGGACAACAAAGGTTCTCCCCTTTAAATAGCTGGCCAGATAAT…
FTT0723c	FLH204626.01X	FtCD00039256	DQ681839		Short-chain dehydrogenase/reductase family protein	ATGTTAACATTACAAAATTATAATTTAATAAAAAACTCTCAAATGACTAAAAATATTTTAATCACTGGTGCTAATGGAGGTATTGGTTCTGCTATAGCTTTAGCAGCAGCAGAAGCTGGATATAATATAGGTCTTCATTATCATATTAATAATCAAAATATTGATAAAATAAAGAAACAACTTGCTCAATATCCCATTCAAATTTCAACTCATCGTGCTGATATAGCAAATGAAGAAGATGTTAGAGAAATGTTTAATGAATTTATTTCTTATCACGGTTCTATGTATGCCCTTATAAATAATGCAAGTACAATTTTTCATACCAGCCGTTTAGAAGATATGAGTATTGATCGTCTACAGAAAGTATTCCAAGTGAATGCTATAGGAAATATTCTATGT…
FTT0725c	FLH204601.01X	FtCD00022847	DQ681840	glpT	Glycerol-3-phosphate transporter	ATGAATTTCCTTAAACCTGCAAAAGCTCTGCCTTTACTAGCTAAAGAGCAAATTCAAAAAGCATACCCTCACTGGCGCCTAAGAATGTTCTTAGTGGCTTATATAGGTTACTTTATATACTATTTCGGTCGTAGTAGTTTTGATGTCTCAAAACAATATATTACAACCCTAACTCCAGATGAGCTTGGATTAATTGGAGCTGGTCTAGGTATTGCCTATGGTATAAGTAAGTTTCTAATGGGAAATATCTCTGATAGAAGTAATGCCAAAGTATTTTTAGCTATCGGATTATTTATCACAGGACTTATAAACCTTCTATTGCCAAGCTTATTATCATTAGGCGTACTTGTAATGTTTATCGCAATGCTTGTAAACGGTTGGGTGCAAGGTATGGGCTGG…
FTT0726c	FLH153166.01X	FtCD00020616	DQ681841		glycerophosphoryl diester phosphodiesterase family protein	ATGAATATGTTCAAAAAAATTTCGGCAACTGCTCTAACTGTCTGTAGTATTATTATAGCTACTGCTGATGTCATTAACATATACGCACATAGAGGATATAGACCTATTGCACCAGAAAATACTCTACCTGCTTACACTGAAGCTATGCGTATTGGTGTAGATGTTATTGATATGGATATAAATATGACTAAAGACAAAGTTTTAGTTGTAACACACGATTTAACATTAAACCCAGATCTGACAAAAGATGAAAATGGTAATTGGATAACAGAAAAAACTCCAATAAAAGATCTAACCTTAGCTCAAGTTAAGAAATACACAGTTGGGTATATAAAACCTGATTCTGCTACGGCTAAGATGTATCCAAATCATATTGGTATGGATAATGTTCATATGCCA…
FTT0727	FLH152950.01X	FtCD00020590	AY774353		hypothetical protein	ATGTCGATTAAAAAGAAAATTATAATTTTATCGATTATATTCGTAGTTTTTATCTTAACTGTTATTTATTACATTAGTGGCTCTAGTATTAAAGTAATTCCTGGTTATGTTAGTACAGATATCAGGTATATATCTTCACAAGAAAGTGGTAGGCTACTTAGATTAGATGTGAGTCAAGGAGAGTCTGTTAAAGAAGGTCAGTCTTTATTTTTAATTGATTCATCAAAAAATCAGATTTTATTAGATTCAAATAAATTTTTGTATAGTGCATCTCAGGCGGTCTCAGAAAATATGTCTAAAGGTAAAAGACAACTATATATAGAAAAGACCGCTATTGATATATCTAATGCCAAGGCAAATTTAGCAGTTGCATCTAAAGAATATCAGCGTCAACAACTA…
FTT0728	FLH153110.01X	FtCD00020610	AY774587	ybhF	ABC transporter, ATP-binding protein	ATGGTAAGTGACAAAGATGATCAACTAATAATAGATGTCAAAAACCTTACCAAAGTCTATGGTGATAAAAATGTAGTTGATAATATCTCAATGCAAGTTAAGCAAGGAGATATTTATGGATTTTTAGGACCTAATGGTTCAGGTAAGACAACTTCTATAAGAATGGTATGTGGCTTACTGCCAATAACAAAAGGTGAGGGTACTTGTCTTGGTTATGATATAGGTACTCACGCGAGTATTATCAAACAGCAAGTTGGTTATATGACTCAGAAATTTACACTCTATCCTGATCTGACAGTTAGAGAGAATCTCAAGATTTTTGCGAGACTTCATAGTTTGAAAAATATTAAAGAAGCTGTTGATAAGACCATAGATAACCTACAAATAGGTAAAGCTAGA…
FTT0729	FLH204571.01X	FtCD00039250	DQ681842	ybhR	ABC transporter, membrane protein	ATGAAGTATTTTGATATTAATAGATATTATGCGATTTTTCTCAAAGAGGTTATTCATATGCTTAGAGATAAAGTCACAATTGGATTAGTGATTGGTATACCACTTATTCAGCTAATACTATTTGGCTTTGCTATAAATATGAATCCAAAGCATCTAAGTACAGCAATAGTTAATGCTGATAAGACATTACAAACAAACTATTTGATTGAGAAGATAAATAATACTGGATATTTTGACATTAAATATGAAAATATCTCAAGAGATGATGCGACAACACTAATGCGTAAAGGTAAGGTGCAGTTTATTATAGATATACTGCCTAATTTTACTAAACAAGTTTATCGTGGTGAATCTCCGAATATTCTAATAATAGTAGATGGAGCAAACGCAACTTCGAAT…
FTT0730	FLH204608.01X	FtCD00022852	DQ681843	isftu2	Transposase	ATGAATTATCATATAAAAGAAGTATTCTGGTCAATTATTTTATCATTCTTAAAATCACAAAAAGGTATACATACCAATGATGAAGCCAAATTAAGATTGTTTATTGAAGCTGTATTTTATGTGTTACGTACAGGCTGTCAATGGAGAATGTTACCATTTTATTATGGTAAATATAGATCAATACATAAGCGTTTTAAAGATTGGTGTGATAAAGATATATTTTCTAGATTATTTAAATCAGTACAAAACCCTGATTTACAAGAAGTCATGCTTGATTCAACAATAGCAAGAGCACATGCTTGTGCTACGGGATATGATAAAGATGATAACCAAGCAATTGGTAGATCAGTTGGTAGGATAACCACTAAAATCCATGCTATGACTGATGCTTTAGGTAAT…
FTT0731c	FLH155519.01X	FtCD00020876	AY774115		hypothetical membrane protein	ATGTTGTTTAAAAACAAAAAACCTACTGACACATTTGAACTAGAAAATAATGACCAAGAAACCATTAGTAATATTATTAAACCAAAGTTATGGAAACTATTTAAATGGCTAATATTTTGTGCCTTTGTGCTAGTTTTAAGCTCTTATCTAAATGCGCGAATATTTTTATTAGCATTTATTTTTGTGATTTTAGTTGTCTTAGCTATCAAACTGTATCTATTAAATAAGCTGCCACCATTGAACTTTAGAATTTACATTGTGGTTTTTCTACTAATTTTTATTTTATGTGAATATAATCACTTAGAAATTGTCTACTTTAAATCATTTGAAATTAGTAATATAGACTACCAAAACTTACTCACAAACCCAGGAATCTTTATTGGTGCATTATGCAATATT…
FTT0732	FLH155432.01X	FtCD00020869	AY774119		hypothetical protein	ATGAAAAAATACCTAATAATGGCTCTCTGCCTTGCTTTTTACAGTTCATCATTTGCAATGGCACAAAATAATGTGGCTAAGCCTTCGGTTGAAAACTATAAGACTAAGATTATGAATATTGATCAGCAAATTATACAATTAATTGCTGAGCGTCGTGGCTGGAGAGATAAAATGTTGAAGCTTGAGAAAAAGCAAAATTTACCAAGTTATGATCCATTTAAAGATCAATCATTAGCTAATACATGTACATCATTTGCGATACAGTATGATGTTTCTCCAAAGTTGGTTGCTGAAGTTTTTGATATTTTAAATAACAAAAATTTGCAACCAGCAGAGCAAAGGTTTTAG
FTT0733	FLH204572.01X	FtCD00022825	DQ681844		glutathione peroxidase	ATGTCTATTTATGACTTTAAGCTAACTGCAAATGATGGTTCAGAATATCATCTGCCTAAAAATAAAGTGCTTTTGATAGTTAATGTTGCGAGTAAGTGCGGTTTTACTAAGCAGTATAGAGGTTTGCAACATTTACATAAAATATATCCAGATTTAGAAATTGTTGCATTCCCTTGTAATTCATTTGGTGGACAGGAGCCAGGTAGTGACGAAGAAATCAAGAATTTCTGTGAAACTAATTATAATGTCACATTTCCAATTATGAAAAAAACCAAAGTAAATGGTAAAGATGCTGAGCCATTGTTTGAGTATCTCAAAGAAAGAGCAAAAGGAGTCTTAGGAACTGAAGCTATAAAGTGGAATTTTACTAAGTTTTTAGTATCAAAAGATGGCGAGACC…
FTT0736	FLH155343.01X	FtCD00020863	AY774121		hypothetical protein	ATGAAAACAGATAAAGTTATAGTTTTAGTGCATGGATTTATCAAAAATGCTAAAGATATGCGTAGTTTAGTAAGTTATCTAAAGCAGGATTATGATGATATTGTAGCTGTGGATTTACCAACTACATTTGTAAGTATGGATGTTGCAGTTAGCAAACTTTGTCAAATTATACAAAATATCCCAAAGACAAAATCTATCACTTTTATAGCACATAGTATGGGTGGTATATTAGTTTGCAAGTGTATAGATAAACTGCAACTTGATAATATAGATAAATGTGTATTTATAGCGACACCATTTGCAGGGTCAAAAGTTGCTGATTTCGGCGATAGAATTCCATTTTATTCTAGGATACTAAAACCAAATAAAGAATTAAAAGTTACTGATGACTACCTTGAG…
FTT0737c	FLH204542.01X	FtCD00022809	DQ681847		hypothetical membrane protein	ATGAAAAAATTAACAATAGCAGCAACTTTTATAATCAGCATAATCTCAACTAGTTTTGCTGCTCTTGCTCATCAAATAAACTCAAGGAATAGTACCTCATTCCCAACACAAGAATTTATTCTAGCTTAG
FTT0738	FLH155623.01X	FtCD00020885	AY774165	yjeF	carbohydrate kinase family protein (YjeF-related protein)	ATGTATGTTCTGCGAATACATCGAGTTATCATGGATTTTCTAACAGAAAAACAAAATCGTGAAATTGAAGAGTATGCTGTTTCTCAAGGTTTAAATCTTATAGAAAATGCTTCTGATGAAATTGTTAAACTTATCTGTAATAAGTTTGATAAACAAAGTAAAGTTTTAGTAATAGCGGGTTCTGGCAATAATGGTAGTGATGGAATTGCTGCAGCTATCAAACTCTTTAATAAAGGCTATGATGTTGATATTTATAGAGTTTTTCCAAAAGGTAATCGAGATAACCAAAATTACTATGCTAAATTCTCAAACCTCAAAGACCCGCTCAGAGAGTTAACCAACATTAGTGATTATGATGTAGTTATTGATGCAATATTTGGTATAGGCTTAGATAGAAAT…
FTT0739c	FLH155439.01X	FtCD00020871	AY774157	hslR	heat shock protein 15 (HSP15)	ATGAGTGTAAGCCTGGATAAATGGTTATGGGCTACTAGATTCTACAAAACTAGAGCTTTAGCAAAAAAAGCTATCGAAGGTGGCAAAGTACACTTTCAAGGACAAAAAACAAAAGTAAGTAAAATTGTAAATATTGGCGATACCTATCAAATTCAACAAGGTTATATAAAAAAGACCGTAATTGTTGAAGCTTTAGATGAAGTTAGAAAGTCTGCTAGTGAAGCACAAAAGCTCTATAGAGAAACAGCTGAAAGTATCGAAAAAAGAGAACAAGAAACAATTCTTAGAAAAACTGCCAATCTAATAAGTCCAGAAAAACCTACAAAAAAACAGCGTAGACAAATAATTGATTTCAAAAGAAAAGATTAG
FTT0740c	FLH153756.01X	FtCD00020681	DQ681848	ostA2	organic solvent tolerance protein	ATGGGCGGTTATTATAGTAACGATTACCAATTTACTAAAAAATTATGTGAGTCAGAAAAAATAGAGCTTGGTTATCAGAATTCAGAATTTCTAAGTGATGGCACTTTGGTTGCATCTGGAAATGTTGAGATGATGAGTTGTGATCAGGAAATATATGGTAATAATGCTGTAATAAATTTGACTGATGACTTTGCTGGAATAAGATCACTAGTAATGACAGGTAATGTTATCGCAAAACAACCATCAACAGGAATATTGATAAGGACTACAGAAATGGGTACCAATATGAATGATGGTAACTATAGTACTGGTCAAGTATATTTCAGATTTCCAGGAGAAATGCCGGAAACAAGGATATATAATAAACAAAACTTCACTGGTTATATACGCGGTTACGCG…
FTT0741c	FLH153058.01X	FtCD00020602	AY774355		hypothetical protein	ATGTTGAAATTAAATTATCAGAAGCTGCTAATTGGTTTTAGTACACTATTACTTGTAATTCCAGGTAATGCTGCGCGTATTACAGGAGAGAATTCAATCAAAGAAGATTGGGGATGTGAGGCTGTTGATGGAGAATGGAGTTATAAACGGACAAATAAGCCGATGGACATCTTTGATGATACATTGACAGAAGATGATAGAGAAAAAACTCTAGCATGTGATTTAGCATAG
FTT0742	FLH204633.01X	FtCD00022861	DQ681849		hypothetical lipoprotein	ATGAGTTCAACAATCATAGTACTGAGTATTATGAGGATTTTTAAATTTATATTAGGAGCTCTACCTATTGCTTTAGTTGGCTGCGGTAGGGAAGATAAGATGGAGTTTGAGGTGGCGCATGAATGTGTTGGTCATTCATGTGCTGTATATGTAGAGCCATTGAGTCAAACATATGTTGATCAGTTAGTCAAGAAAGTGATGATTAGTGAAGTAAGGCATGATGTTAGGCAAGTTAATCATAGTTTGAAATGGTATGGTTTAGAGGGTGGTAACTATATTGACTCTGATATATTAACGGAGCTTGATCTGAAGCAGTGTGGTGATAGTGTATGTGATGATACTAAGAATCCAGTTGCTTACCAATTTCAGCAAGGTCAAGAGTATGTATCATTGGACGTA…
FTT0743	FLH231430.01X	FtCD00039348	DQ681850		hypothetical protein	ATGAATAAAACTATAAATTTACATAAAATGAAAACTTCTCTAGATCCGGCAAATAATGCTCGCTACGAATTAGAAGATATTTGTCTAAATGATTATATTGGTCAGCAGCTAAAACTTGAATTTCTTGATGAAATTAATTGTGTCGCTTGTGGAGCCAAAACAAAAAAAAGCTACTCACAAGGGTATTGTTTTATGTGTATGCGAAGATTGCCTGAGTGTGATATATGTATCGTTAAGCCAGAGTTATGTCACTTTGCCGCAGGGACATGTAGAGATTCAAGCTGGGGCGAAGAAAATTGTATGAAAACTCATATAGTATATTTAGCAAATACTGGAGATATCAAAGTTGGTATTACTAAGCTAAAAAATATTCCATCACGTTGGATAGATCAGGGTGCT…
FTT0744c	FLH231440.01X	FtCD00039353	DQ681851		hypothetical protein	ATGATATTAGTTTTGCTAGGGACTTTATCGTTAGGAATAGCTATTTTAGCGTTACCTAAATACCAAACATACAGCCTAGGATTCTGTATAGGCTTTATCTCAATAGTACAGCCTAGTAACCACATGGATTTTGAAGTAGCAAAATCTATTACCATCGGAATGAGCACTATAGTTGGTTCTATCGGACTTTGGCTAGCATTTAAGTTATATCCTCAATCACCTTATACGATTAGTAGAAAAATTGCGATTAAATCAATAGTTAAAGATATCCAAAAACTAAAAAGGCAAGAAATCTCAAAAGAACATTACCAAGCAGGACTAATCAAAAAAATATTAAGTGTATATAGAAATAGAAAAGATGATCCATCATCAGAGAAAGATATAGAATTTGCCCTACAA…
FTT0756	FLH153211.01X	FtCD00020621	DQ681852		Cation-efflux family protein	ATGTCAGATAGCAGATATCAAATTACCAAGAAAGTTACTCTTGTTGGTATGTTTATAAACGCTTTGCTTGCTATATCTAAAACTCTAATAGGAGTAATAGGGCGTTCACCAGCATTATTTGCTGATGGTATACATTCATTTTCTGATCTTTTAAGTGATTTCATGGTTTTATTTGCAGCAAAATATGCAAATAAAGGCGAAGATCATAATCATCCGTATGGGCATGAGCGACTAGAAACTTTAGCAACGTTGGTATTATCAGGACTATTGATAACTATTGGTTTTATGATTGTTTATCATTCTCTTGTGAGCTTACTTGGTGGTGAGTATGTTATACCAGATAAGTTTACTGTCTATGCTGCTATTTTCTCGATTTTTGGTAATGAATTTATCTATCAA…
FTT0757	FLH153070.01X	FtCD00020603	AY774564	galU	UTP--glucose-1-phosphate uridylyltransferase	ATGAAAATAGGAAAAGCAGTTTTTCCTGTAGCTGGATGGGGCACTAGATTTTTACCAGCTACTAAATCATGTCCTAAAGAAATGCTAACAGTTGTTGATAAACCATTGATCCAATATGCTGTTGAAGAGGCTATAGAGGCAGGCTGTAAAGAGATAATATTTGTTACTAGCTCAAATAAAAAATCCCTAGAAGATCATTTTGATAGAAACTTTGAATTAGAATATTCGCTAGAAAAAAAACAAAAATATGAATTGTTAGATTTAGTAAAAAATATAATTCCTAAAGATGTAAGTTTTTTCTTTGTACGTCAGCCAGAGGCGCTAGGACTAGGGCATGCGGTTTTATGTGCAAAACCACTAGTTGGAATTGAGGATTTTGCAGTTATATTACCTGATGAT…
FTT0759	FLH153102.01X	FtCD00020608	AY774582		conserved hypothetical membrane protein	ATGAACTCTTCATTAACAAAAGGCTACGCAAAGATAGTTTTGGCATTGGTATTTTGGGCAAGTTTATACCATATAGCTCCTTTACCACTTAGTTATGTTGACATATATCTCGTTGGTTTTATCCGCTATGCCTTTGCATCGTTGATTTTTATTGTAGTGCATTACTATTTTACCAAGACATTTTTTCCACGGCTTAATCTTAAGCAATGGGCATATGTCATCGCTGTAGGATTTTTTGGTGTATTTTTATACAATATAACGTTTCTATGGGCGGAAAAACTAATCTCGGGTAATATTGTTGCTATTATCTATGCTTTTACTCCTTGCTTAATAACAATTTTATCTAGCTATATTTTTAATCTCAAAGTAAATCAACAAGCTAAAATTGGTATACTTGTG…
FTT0760c	FLH231434.01X	FtCD00039350	DQ681853		hypothetical lipoprotein	ATGCTCAAAAAAATCATAATTTTATCTAATATAACTATTATCCTAACGGGGTGCGCTGACTCTTATGAAAAAAATTTATGGAATAACTATCATAGAAAAACATCAATAAGCTCTGAATTACACTCTAAGTTAGTTAAAGTGCATAACCGTGATAGTCTAGGTTTTACATACTCACCTTATCAAGCAGATTTCCGCAATAGATTATAG
FTT0761c	FLH153099.01X	FtCD00020607	DQ681854		hypothetical protein	ATGAAAAAACTCATAATTGTGACTTTAACAATCCTACCTACTTTAGTAGCAGCAGATAAAGTTTGCGATGGTAATACTTATGAAATAAATGCGTGTCTAAAATCACAAATGCAAATTTATGATACAAAACTAAACGATGTGCAAAACCATGATATTAAAAATTTCAAAAAATATCGCGATAATATTTGTTATGATATTAGTTCAACTTATAAAGGTGGTACTTATCAAGCGATCAAATATGGTAATTGTGTAATCTCACTTGATAAATGGGATTTACAACAATTAAAACCATAG
FTT0762c	FLH153190.01X	FtCD00020619	DQ681855	recF	DNA replication and repair protein recF	ATGTATATATCTAACTTACGCTTACAAAATTTTAGAAATATACCTGCTAAAAGCTTTGATTTTAAAAATAGTATAAATTTTATAGTTGGTAAAAATGGTTCAGGTAAAACCTCAATTCTTGAATCAATATATTTTTTATCACATAGTCGTTCTTTTCGTAGCTCACAGTTAAATAGAATTATTAACCATAATGCTGATGAGTTTATAATCTATACTAAAGCTTATAATCCAGATGAAATTACTATCTCGCTATCACGCAAAAAAAATAGTAATAATATCTCAAAGCTAAATTTAGAAATACAAAAAAACCATACAGAAATAACTAGAAACTTACCCATTCAATTGATCAATCCCGAGAGTTTTAATATCATAAACTCTGGAGCACAACAAAGATGTAAA…
FTT0763c	FLH152982.01X	FtCD00020594	AY774567	yjjV	TatD related DNAse family protein	ATGTTTATTGATACACATTGTCACTTAGATTTTGATATTTTTGATAAAACTCGTCAAAACATACTACAAAACTGTAACAAGCTAGGTGTTAACTATTTTATAAATCCTGCTACTCAAAGAAATAATTGGGATAAGCTAATACAAATAAATAGAGAGTTTAGCAAAATTGTTATATGTTTTGGGTTACATCCTATATTTATTGATAAGCATATTCATACTGATTTAAAAGATTTAGAGTTATATAGCCAAAAGCATCCAACAAAACTTATTGGTGAAATTGGTCTAGATAAAAGATTTAAAAACTTCAACAAACAACTAGAGTTTTTCTCAGCACAAATTAATATAGCTAAAAACCTTGATAAACAAGTAATTATCCATGCTGTAAAATCACATAATGAG…
FTT0764	FLH153717.01X	FtCD00020676	DQ681856	glyS	Glycyl-tRNA synthetase beta subunit	ATGAGTAAAATTACAAAAGATTTTTTTTTTGAATTGGGTACTGAAGAGTTACCACCAAAAGCACTAAGAAATTTAGCCCAGTCTTTATTAGTCAGTGTTGAAAGTCAGCTAAGAGAGGCAGAAGTTAGTTTTGGTGATACTAAATGGTTCGCTTCACCAAGAAGGTTATCTTTTATAATCAAAGGTCTAGCAGAGTCTCAACAAGATGTAGTTATTGAAAAGCAAGGACCGTTGGTAAGTATTGCTTATAAGGAAGGTGAACCTACTCAAGTAGGTTTAGGTTTTGCAAAATCTTGTGGTGTTGAGCTTGATGAATTAGAAAGGGTAGCTACACCAAAAGGTGATAAGCTTTTTTATAAAACAGTACAATCTGGTCAAGCAACAGTTAATTTATTGCAA…
FTT0766	FLH151091.01X	FtCD00020425	DQ681857	deoD	purine nucleoside phosphorylase	GTGTCATTGCCTACTCCTCATATAGAAACATTAAGAAAAGAAGAATTTGCTAAAACAGTAATTATGCCAGGCGATCCACTAAGAGCTAAATACATTGCTGATAACTACCTAGAAAATGTTGTTAGAGTGAATGCTGTTAGAAATATGTTTGGCTATACAGGCACTTACAAGGGTAAGAAAGTTAGTGTTATGGGATCTGGTATGGGTATGCCAAGTATGGGTATCTATGCTTATGAGCTTTTTAAGTATTATGATGTAGATAATATTATTAGAGTTGGTTCAGCTGGATCATACAAAGCTGAATTTAAAGTTTATGATGTTGTTCTTATCGAAGAGAGCTATTGTGAATCTAATTTTATTGAAATTGTTACAGGAAGTAAAACTATTGATGTAAGATCA…
FTT0767c	FLH204566.01X	FtCD00022820	DQ681858		hypothetical protein	ATGACTATAAAAATCTTTCCAGAAAAAGTTGCTAATATCCCGACACATACAACGAGAAAGAAAATAACCAATACAACATATGCTAGCAAACAACTTATATCTAAAGCAGCTCATCTTAAAACAACTATCGAAGTTGCTAACAAAGAGCTATACAAGCTTGATTTACCTTATTTAAGAGATACGCAAATAGTTTTTTATTCTCCTACTAAAATAATCGTACATAGTAATAAAGAAATTCTCAAATCAAAACTTAAAGAGCTTCATGACCAATTTGTCACGCAACTAAAACAAAACACCCTATTTTCCAGACTTGAGAGGATAGAAATAATTATAGATTATACACAAAACAATAATAAAACAAACTCTAGTGTAAATAATGAGACTGCTAAACAAGCATTA…
FTT0768c	FLH204477.01X	FtCD00022775	DQ681859		hypothetical protein	ATGAGATATTTATACTTCAACTCAGTATCTACAATAATGCTTGTTCTAGCAACATCTAGCTGCTCTACTGGGATACCGGAAAATAGCAAAAATATAAAGAATCAAGTTGTAATAAACCAACAATCACAAAAAGATACTCCAAATGATACCGTACCAGTTTGGTTTAGTTCAGGTCAACCAAATACAGATCAATTATTGTATGGCTTTGGGGCTGCAAAAAGCCTTGAAAAAGCAATACAAAAGGCTCTTGCTGATATGGTTCAAAAGCTTCAAGTTACAGTATCAACAACAACTAACTTTACGAATGTTACAACTAATGACAAAGTTTCCCAAAAACTAACTCAACAAATCACCACCACAACTACTCAAATAACTATTCCTAACTACAAGGTAATCAAT…
FTT0769	FLH153741.01X	FtCD00020679	DQ681860	secA	preprotein translocase, subunit A, ATPase secretion protein	ATGTTAAGTTTAGTACAGAAAATAATAGGTAGTCGTAACGAAAGATTTATAAAAAAAGTTTCTAGAATAGTTCAAAAAATTAACTCTTTAGAACCTGAGTTTGAGAAACTTAGTGATGAGCAATTAAAAGCAAAAACTTTTGAATATCGCGAAAGACTTGCAAACGGTGAAATATTAGACAATCTTTTGCCAGAAGCTTTTGCAACCGTTAGAGAAGCTGGAAAGCGTACTAAAAATATGCGTCATTATGATGTTCAGCTGATAGGTGGTATAGTTCTTCATCAAGGTAAAGTTGCTGAGATGAGAACAGGTGAGGGTAAAACTTTAGTTGCCACATTACCAGCTTATCTAAATGCTTTGACTGGTGATGGTGTACATGTAATTACAGTTAATGATTAC…
FTT0772	FLH204464.01X	FtCD00022767	DQ681861	rplU	50S ribosomal protein L21	ATGTACGCGATAATTAAAAATGGCGGTAAGCAATACAAGGTAAAAGAAGATGAAGTAGTTAAGCTTGAGAAGTTTGACCTTGGTATTGGTGAGAAAGTTGAGTTTGATACAGTTTTAATGGGACAAACTGCAGCAGGAGAAGTTAAAATAGGCGCTCCAACTGTAGCTGGTGCTAAAGTTGTTGGTGAAGTTGTTGAGCAAGGTCGTCATAAGAAAGTTAAAATTATGAAGTTCCGTCGTCGTAAGCACAGCATGAAGCAACAAGGTCACCGTCAGTATTTTACAGCGGTTAAAGTTTCATCTATTAGTTTATAG
FTT0773	FLH204459.01X	FtCD00022763	DQ681862	rpmA	50S ribosomal protein L27	ATGGCTCACAAGAAAGCTGGTGGTAGTACTAGAAACGGAAGAGATTCAAACCCTAAGTATTTAGGTGTTAAAAGATATGGTGGTGAGTTTGTTAAAGCAGGTACAATCATCATACGTCAAAGAGGTACTAAAACTCATCCTGGTGTAAATGTTGGTTGTGGTAAAGATCATACATTATTTGCACTTAAAGATGGTACAGTTAAGTTCCATACTGGTGGCGCTTTAAATCGTAAATTTGTTTCAATCGAAGAATAG
FTT0774	FLH151208.01X	FtCD00020434	AY774870		hypothetical protein	ATGTCAGAACAAAAAAGTGTCTTAGGAACTGCTCTAAAATCATGTTGTTTAAAACCAAAGACGGGATTTTATCGAGATGGATTTTGTCGTACTGATAATCATGACTATGGTCGCCATGTTGTATGTGCAATAATGACTCAAGAGTTTTTAGAGTATACTGCATCTAGAGGTAATGATTTATCTACACCAAATCCTTTTTTTGATTTTCTTGGGCTTAAACCTGGAGATAAATGGTGTTTGTGTGCTCTGCGATGGTTAGAGGCATATCAAAATGGTGTTGCGCCAGAAGTTGTACTTGAATCAACTCATCAATCAGCTCTTGATGTAATCAAAAAAGAATATCTATTTGAGAAAGCCTATTCTAATGGCAATGCTTAG
FTT0776c	FLH204483.01X	FtCD00022776	DQ681863	rnd	Ribonuclease D	ATGATAATTAATACAAATAAGCAATTAAATAATGTGATAGAAATTCTTAAAAACACTTCACAAATAGCTGTAGATACTGAATTCTACTGGATGCGTACATACTATCCTGAGCTTTGCCTAGTACAGCTAGCAACTGAAAATGAGATATTTCTGATAGATACACTAAAAGATTTAGAGTTTAAGAAGTTAAAAGAGATTTTTGAAGATAAGGATATTCTAAAAATAATCCACTCGGCAACTAATGATATTCCTATTATTAAAAGGTTCTTTAACTGCGAAGTAAATAATATTTTTGATACACAACTTGCAGCCACTTTTCTCGGTTTTCAAACACAATCATCTCTAAAAACTCTACTGAAAGAAATTTTAGATATTGAAATAGAAAAAGAATCTCAATTT…
FTT0777	FLH151012.01X	FtCD00020420	DQ681864	uvrC	DNA excision repair enzyme, subunit C (UvrABC system protein A)	ATGATTGTAGATAATTCTAAAGATTTTGATTTAAAAAGTTTCTTGGCGAACTTGACTACACATTCCGGTGTTTATCGTATGCTTGATAAACATGGGGAGATAATTTATGTTGGTAAAGCAAAAAATCTTAAAAACCGTGTAAACAGTTATTTTTCAAAAGGTGCTAAAGATAGTAAAACTTTAATGATGGTAGAGCAGATAGCCCGAATTGAGATAACTATTACCCCTAGTGACTATGAAGCATATTTATTAGAAAATAATCTCATCAAGCAACATCGTCCTAAATACAATATTTTATTTAAAGATGATAAAAGTTACCCATATCTGGTAATTTCGCGTGATAAATTCCCTAGAGTATCTTTTTATCGTAGCAAATCAGCATATAAAAAAGGTCAATGT…
FTT0778	FLH204472.01X	FtCD00022772	DQ681865		hypothetical protein	ATGAATAAAAAAGGTTCGCTACTGAGTACTTTAGGAATATTTTCAATATTCTTTTGTTACTTCTTTGTTGATAGACAAATTGTTTGGTTTTTATATGAACATAATTCTCGACAATATACAATTATGAGGTTTTTCTCAGATAATATTATTTCATTTATAAAAGACTTGGTATTTGTATTTTACATATACTATTTCATCAAACTTATACTAAAAAAATTAGTAGACACTGATATAAAAATTTTACTAGTAGCTAATGCAATTATAATTGGGCATTTTATAAAAGATATTCTAAAGGGGATTTTTGGTAGATATTGGCCAGAAACTTTCAAGAATAATCCTTCATTAATTAGAGATAATCTGTATGGTTTTAACTAG
FTT0780c	FLH204461.01X	FtCD00022764	DQ681866		hypothetical membrane protein	ATGTATTTTAAAGGTTCTAGTCATATGGATATCAATACTATTTCAGCAACATTGATAAACAACTCACTACCTATAATCGCAGCTTTTAATCTTTTGATTCATATTTTCTGTGGTTTAGGAATAGCAAAAGATATACCTAAGGTTTTAGATAGAAGGCTTACAACTATTCTACTACCAAAAAATATTTGGATTCTAGTTGGTTTAGTATTTGGTATATGGGGATTACTGATATATTGGCTATTTCATCACTCAACCTTCTCACGAGGGTAG
FTT0781c	FLH154285.01X	FtCD00020743	AY774011		hypothetical protein	ATGCTATGGAAAGAAAGAAAGATAGTATCAGCACCATCTAGCGATATGGGCTTTGATAAAGCTAAAGCAAGTTGGGATATTATGAAAATATCATCAGAGCTTGTTGAGGGCTATGAAAGGCTAGGCAAGATTGCTCCTGCTATTAGCATATTTGGCTCTGCGAGAATTTCAAAAGATGACAGATACTATAAAGATACTGTAGAACTGGCTAAATCATTGTCAGATCATGGTTTTGCTGTAATCACAGGTGGTGGTCCAGGTATTATGGAAGCTGGCAATAAGGGTGCCCAACAAGGCTCATGCTCTAGTATAGGTCTAAATATCACCCTACCACATGAGCAACGCCCAAATCAATATCAAGATATCTTCTTAATTTATAGATATTTCTTTACACGCAAA…
FTT0782	FLH154349.01X	FtCD00020748	AY773992	fabI	Enoyl-[acyl-carrier-protein] reductase (NADH)	ATGGGTTTTCTAGCAGGAAAAAAAATATTAATCACTGGACTTTTAAGTAATAAGTCAATTGCATATGGTATTGCTAAAGCTATGCATAGAGAGGGAGCCGAGCTTGCTTTTACTTATGTTGGACAGTTCAAAGATAGAGTGGAAAAATTATGTGCAGAATTTAATCCAGCTGCAGTTTTGCCTTGCGATGTGATTTCTGATCAAGAGATTAAGGATTTATTTGTAGAGCTAGGTAAAGTTTGGGATGGTCTAGATGCCATAGTTCATTCTATAGCTTTTGCACCGCGTGATCAGTTAGAAGGTAACTTTATTGACTGTGTAACTCGCGAGGGTTTTAGTATCGCTCATGATATTAGTGCCTATTCTTTTGCAGCATTAGCTAAAGAAGGTCGTAGTATG…
FTT0783	FLH204463.01X	FtCD00022766	DQ681867	ars	Arylsulfatase	ATGAAAAAAAGAGCTTTTAACTTTGTATTTGCTTCAATGTGTGCTTTTGGAGTATCTCAAGGTGTTGCACAAACAAATCCGCAATGCTTAGATAAATCTTTCACTTTACAGCTTCTTGGTTCTGGTGGACCAATTACAGATGATGCTAGAGCATCTGCAGGTGAGTTGATATGGATCAATGGCAAATCTAAAATTTTGATTGATGCTGGTGGTGGGACATATCTTAGATTTGGTCAATCAGGAGCTAGATTAGAAGATTTAGACTCAATCAATATGACTCATTTCCATGCGGATCATTCAGCAGATATTCCAGCGATATTAAAAGGAGCATATTTCTCCAAAAGAACAGAGAATCTTCCGTTCTCAGGTCCTACACATTCAGGTCTTTTCCCAAGCGCG…
FTT0784	FLH154353.01X	FtCD00020749	AY773993		hypothetical protein	ATGAAAAAAATACCTTTAGCAATTGCTTTAACAGCTTCTATGTCGTTTGGTATTGCTTTAGCAGCAGAAGCTAAAGCTCCAGTTACACAGGTTCAGGATTCATCTGAGAGTAGTCCAATAGCTCAAGGTGAAGGCAAATGTGCAAGTGGTAAATGTGGCTCACTTAAAAAATTTGGTGGGGTTGATGTTGATGCTGATGAGCAAGATGGAAAACTTGTCAGAGCAAGAGATGGTAATTGTGGTACTAAAGTCTGTAAAGCTTATGGTAAGCAAGATAAAAAAGAGATAGCACAGTTAGGTAAATGTTCTAATGGAGTTTGTGGACAATAG
FTT0785	FLH231426.01X	FtCD00039346	DQ681868		hypothetical protein	ATGTGGACAATGATCGGTAAATGTCAAGGTATAGGCTTAAGGTCTGGACATCAGTCAATATTATCAACACAAAAAGTTGATGGAATTGATTTTCTTGAGCTTTCTCCAGAAAATTGGATGGGTTTAGGAGGGTTTAAGCAAGTCTACCTTGACAAAGTTGCTAGTATTTATCCTCTCATAGCTCATGGTTTGAGCCTGTCAATAGGTGGATTTCAGCCACTTAATAAGAAATTTCTGAATGAAATTAGAGCATTCTTAGATGATTATAATATTGAGATATATAGTGATCATTTATGCTTTTCTGATGATGATAAAGGCTACCTATATGATCTTTTACCAGTCCCTAGAGAGAAAGAAAATATTTCTTATATTTGCAATCGCATAGAGCAGGTTCAAGAG…
FTT0786	FLH154261.01X	FtCD00020741	AY773996		hypothetical protein	ATGAATATATCAGAATCTATAAAAACTAAAATGCAAAACTTTACTCATGCTATTCGTTATGATGATTCAAGTGATGATAGAGTACAGATGTATCGTGAATTTATCGTTGGGAATGTCTTAAGCGTCTTAGAAAATACTTTTCCTTATTTTAATAAATATGCTTCTCAAGAGTTAAAAGATAAGATTTTAAAAGTTTTTTTTGAGGACAATATATCATCTGAGCCAGCATTTCATCAAATAGCTACAGAGATACTAAAATCTTCAAAGTCTGTAGAAATGAATGAAAAATTATCTAAGTTAATAGAGTTTGAGTGGCTACTTTTCTCTATAGAAATAGATGAATCTAAAGTTTTTGAGAATATAAAAATCACTAAAAATCTAAGTTTTAAAGATATCCGA…
FTT0787	FLH154512.01X	FtCD00020760	AY773986		DoxD-like family protein	ATGATAAATAGAATATATGATATATATTACAAGATTATCCAAAAGTTTCAGTCTATCGATTTTTTACTTTTGTTAGGTATAAGACTCTATTTAGTGTCGACTATGTTTGTAGGTGCTAGATCAAAAATAGAAGGTTTTAGTACAACCGTAGCATGGTTCGGTGCTCCAGCTTCACAGGGAGGACTAGGTATGCCAATGCCAGAAGTAATGGCATTTTTAGCAACTTCCGCAGAAGTTATTGGCTGTATTGGTATAGCATTAGGTTTATTTACTAGACTTGTTTCTATTCCAATGATGTTTGTAATGGGTGTTGCTGGTGCCGCGGTTCACTGGGCTCATCGATGGCCTGCGATCGCAGACAAAACTGCAGAATCTACACAGAGACTAAATGATCTATTT…
FTT0788c	FLH204469.01X	FtCD00022770	DQ681869	kdsD	arabinose phosphate isomerase	ATGGAGATTAGCATGACCAGCCATATTAACAATGCTGTTGAAACATTTCGCTTAGAGATAGAAACGTTAGAAAAATTAAAAAATTCTATAGATGAGAATTTCGAAAAAGCATGTGAGATTATTCTAGAAAATAATCGTGATAAAAGTCGAGTAATAATAACCGGTATGGGAAAATCTGGTCATATCGGTAAAAAAATGGCTGCAACATTCGCTAGTACTGGGACGCCTGCTTTTTTTGTACACCCAGGTGAGGCTGGACACGGTGATTTTGGCATGATTACTAAAAATGATGTATTAATAGCTATTTCAAACTCTGGGACATCATCTGAGATCATGGGATTACTGCCAATGATAAAACACCTTGATATTCCAATAATTGCTATTACTAGTAATCCAAAA…
FTT0789	FLH204499.01X	FtCD00022788	DQ681870	rpe	D-ribulose-phosphate 3-epimerase	ATGAAACATATTCAAATTAATCCTTCTATACTCTCTGCAGATCTTGCCAGATTAGGGGATGATGTCAAGGCAGTTTTAGCGGCAGGGGCTGATAATATTCATTTTGATGTTATGGATAATCACTATGTGCCTAATCTGACATTTGGACCGATGGTGCTCAAGGCTTTGAGAGATTATGGTATAACTGCTGGCATGGATGTTCACCTTATGGTTAAACCTGTAGATGCTTTAATTGAGAGTTTTGCCAAAGCTGGAGCAACTAGTATTGTTTTTCATCCAGAGGCGAGTGAGCATATTGATAGAAGCTTACAACTAATCAAATCTTTTGGCATTCAAGCTGGGCTTGCTTTAAATCCTGCTACAGGTATAGATTGTTTGAAGTATGTTGAGAGTAATATT…
FTT0790	FLH204521.01X	FtCD00022800	DQ681871		bacterial sugar transferase family protein	ATGAGCTCAATAAAGTCTAATTTAGTGATCATTCTCAAAACAATAGAGCTAGTAATATCTGTAATACTTGTATTACTAAGTTACTCTATACCTTTGCATCTACTAAATTATGATACTAGTAATTTTAGTAGTTTTGATTTTATGGCTACTTTTATAGTACTAACATCTTTAACAACTTTTCTTATCGCTGAATATACTAATGGTGAAAAAGTATCTAAATCAAAAAATGTTCTAAAAGTTTTATTATGTGGACTAGCTATTGCAATTATCATAACATCGCTAGCATTCTTTCTAAGAGGCTTTTCATTTCCACGTAGCTTGATTATTTTGGGTTTTTTGCTGCAGCTTGTAATGCTATCTGTATCTCGTAATATTTTTAGGTGGCTGATAAGAAATACT…
FTT0791	FLH204475.01X	FtCD00022774	DQ681872	galE	UDP-glucose 4-epimerase	ATGAATAAAAAAATCTTAGTAACAGGTGGTGTAGGCTATATAGGTAGTCATACAGTGGTAGAACTTCTTGATAGAGATTATCAAGTTGTGGTGGTAGATAATCTTTCAAATAGCAAAGTATCTGTAATAGACAGGGTTAAAAAAATCACAAATAAAGATTTTGATTTTTATCAGCTAGACCTTTTAGGTAAAGCTAAGCTAACAAAAGTTTTTCAAGAGTATGATATTTATGCTGTAATTCATTTTGCTGGCTTTAAAGCTGTAGGTGAGAGTGTTGAAAAACCGTTAGAGTATTATCATAACAATATCCAAGGTACACTAAACTTACTTGAGCTAATGCAAGAGTATAAAGTTTATAATTTTGTCTTTAGTTCATCGGCGACTGTATATGGGATGAAT…
FTT0792	FLH154516.01X	FtCD00020761	AY773989		glycosyl transferases group 1 family protein	CTGAAAATCTTACATGTGTTTAAGTCATTTTATCCATATACTTATGGTGGTATAGAGAAGTTTATACATGAGCTATCGATTGCTACAGCTAAAAAGTATAACGTTGAGATACATATACTAGCGATGGGTAAAGAAAATCAAACTATAGATAAAGATTTTTACACATTACATTTTGCTAAAACAAATTTAAATATTGCATCAACTACTTTCTCATTTTCAGCGATTAAAAAATTCAAAGAATTAGCTAAGCAAGTCGATATTATTCATTATCACTTTCCATATCCATATGCTGATTTATTACAGACTATTTGTAGATTAAAAAAGCCGTACATAGTTACTTATCATTCGGATATTATCAAGCAAAAAAGATTGATGATGTTATATAAACCTTTGATGAAA…
FTT0793	FLH204537.01X	FtCD00022806	DQ681873		ABC transporter, ATP-binding and membrane protein	ATGAAGCAATTTTTTAAGTATTTCATTGGTATTTTAGATACTACTCAGAAAAAAAGGTTTTTTTTATACCTTGTTCTATTATTTTTAGGTTCTACATCTTCTATGCTAGGTGTTGGAGCTGTTATCCCTTTTGTAAATGCACTAATTAACCCAAAGTATTTTGATAATATTGTTATTTTAAGAAGTTTTAGCAATTTTCAAATAATACTTATAAGTATAGTTTTATTGATTTTAGCTTTTTGGATAAAAAATATAATCGGAGTTATTCTGTTTTGGTTTCAAACTAAATTTTTAAACTCTATAGTTCTTGATATTCAGAAAAAACTTTTTAGGCTATATATACTGATGGATTATGAATCTCATTTAACAAGAAGTACACCGACACTTATCCGTAATATA…
FTT0794	FLH154540.01X	FtCD00020764	AY774004		hypothetical protein	ATGGTGAAGTCGATAAAGGATGATTGCTATGACTTTGATAATAATATAGTGTTTGTTTTTGATTTAGATGGAACTCTTACAAAAAATGAAACGTTACCAGTTATTGCCAGATATTTTGGTATTGAAGATGAAATAAGTAAGCTAACAGCAGAAACAGTAAAAGGTAATATACCTTTTATAGAAAGTTTTATTAAGAGAGTTAATATATTAAAAGACTTTTCTATTAGTGAAATAAATAATTTACTAAGAGGAGTTGACCTATTTAGTAAAATTGTTGATTTCATAAAATTGTATAAAAGTAACTGTTATATTGCTACAGGTAATTTTGATGGTTGGGTTTCCGGTCTTATTGAAAAAATAGGTTGTACATACTTTGCATCAGAAGGTTTTGTAAAGGAT…
FTT0795	FLH204501.01X	FtCD00022789	DQ681874		hypothetical protein	ATGATACATATGATGATTACATACGTGCTAAGAACTTTGTGGGAGAATGGTCTAATGAATAAAAAAATAGAAGCATATTATGATATCTTATCAAGGAAAATCAAATCCCCATATGAGACAAGAAATAAATCTAAAGATTTTTCTCAATATGATATTTTTTTAGTAAAAAAGCTAGCAGATAGGTCAAAAAATTTATTAGATCTTGGATCTGGGACAGGATTGTTGATTAATAGTATTCATAACTGCTTCAAAAAAATAGTTGCTGTTGAGAAGTATAAAGAGTTTTCAGATTTTATAATTAGAAAACCAAATATAGATATTATTAATGAAGATATTACCAATTTTAAAACACATGAAAAATTTGATATTATTACTACTTTTGGAGTTATGAATTTTTTT…
FTT0796	FLH231416.01X	FtCD00039342	DQ681875		hypothetical protein	ATGTCTTTAATTCGTAAAATAAAATTATCTCTTCGTAATATTATTCATACAATATTAGAAAATAAAAGAAATAAGTTTTTGAAACGTAACGGCTTAGAAGTTTTAAAGTACACCACCAATCTTTTGCGTGATGAAAATATAAAGCATTGGATCGATGGAGGAACTCTTTTGGGTATAATTAGAGATAAGGATTTCATTGTTAGAGATACAGATATTGATATTGGTATTTTAATTGATAGACCAGACTTTTTGTATGAGGTATTAGAAAAAAATAATTATCATATTGTTTATTATTATGTCGATCAAAATAATAAGAAATTTTTAATTAGAGCAGAAATATATAATGTAGGTATTGATTTTGAAATATTTTTTGAAACAAAAGAATTTTATTATTATGAT…
FTT0797	FLH156902.01X	FtCD00021045	DQ681876		glycosyl transferase family protein	ATGAAATATTGTGAGCTTTTAACTTTAGTTATTCCTATATATAATATAGAAAACTATTTAGGTAGATGTTTAGATTCAGTTATTAATCAGACATATAAAGATCTAGAGATTATATTGGTAAATGATGCCTCTACTGATAACTCTCTGGAAATATGTGAGAGTTATGCAAAAGAAGATAGCCGTATAAAAATAATTAATAAAAATAATGGTGGATTATCTAGTGCAAGAAATGTGGGTTTAGATGCTTGCAAAGGTGATTATGTAACATTCATAGATAGTGATGATTGGGTAAGTTTAGATTATATTGAGATTTTATATAAAAATATTATTGATAATAATGCAGATATTTCTATTATTAACGCAATTAAAGTAAAATCGCAAAATAATGATTTTACTTTA…
FTT0798	FLH204471.01X	FtCD00022771	DQ681877		glycosyl transferase family protein	ATGTACAATCTTAATTATAAGCAGCTAATATCTATAATCATACCAATATACAATACTCAACAATATCTTAGTAGATGTTTAGAATCTGTTATTAATCAAACATATAAAAATTTAGAAATTATACTTATAAATGATGGGGCAACTGATAATAGTCTATCAATTTGTCAAAAATATAAATCTAAAGATAGTCGGATCGTTTTGCTAAATCAGCAAAACTCTGGGCAGGCATTAGCTAGAAATAATGCTTTAGATATAGCAAAAGGTGATTATATAGCATTTATAGATAGTGATGATTGGGTTAGTTTAGACTATATTCAAGCATTATATAATCATGTTTTTAGCTATTCAGCAGATATCGCTATATCAGCAACGGTTGGCTGTAATAAGCAAATAAAAGCT…
FTT0799	FLH204473.01X	FtCD00039244	DQ681878		glycosyl transferases group 1 family protein	ATGTCAAAATTATTAATAGATACGCGCTGGCAAGGCAAACATGGAATAGGTAGATATGCTTGTGAAATAATTAAATATTTACCACAGAATTTTATTACTACTTCCAAGCATATAAAACCATTTTCCCTAAAAGATTTGTTTTATCTAAGTTTTTTGATTAGAAAAAAAGATGTTCTGGGATATTATACTTTTGCTGCGAATGTTCCATTGCCTATATTTTTAAGAGCAAATAAACCAATAATTATAACTATCCATGATCTTATACCTATTATATCTAAATATGAGAGTAACTTTATAAAGAAACTCTATTTTGAAAAAATACTAAAGCCGCTTATTAAAAGAGAAAATGTCAAAATTATGACAGTTTCAAACTTTTCAAAAAATCAAATATTAGAATGG…
FTT0800	FLH156749.01X	FtCD00021020	AY774276		haloacid dehalogenase-like hydrolase family protein	CTGAAAACCTATATTTTTGATCTTGATAACACACTTTATTCTTACAAAAATGGTTTATTTGATAGCCAAATGGCGAGAATGAGTGAGTATATTAAACTAAAACTAAATATCTCAGATATCGAAAAAGCAAACGCAATACGTGATGAGCTATACTATGAGTTTGGTTCAACTATGCTTGGGATGATGCGTTATCATAATATCGAGCCAAAAGAGTTTCTTGATTATATTGATAATATTGAGATTAGTCATTTTGAGCCTAATCAAAAGTTAAACAAATATATTAATGATTTAAGAAAAAATAATCGTACTTATATTTTTACTAATGCCTCTGATTTTCATGCTAGTAGAGTACTTAAGCAACTTGGTCTAGATAATAGTTTTGATGGAGTTCTAACTATT…
FTT0801c	FLH204485.01X	FtCD00022778	DQ681879		Carbohydrate/purine kinase pfkB family protein	ATGAAAAATTTCAAAGCTCTAACAATTGGTGGTGCAACTCTTGATACAATTATTGAATATGAAGAAATGTTTACCATGAATATGCAAAAGAAAGACACTATTCAATCTTTTATGCTTCTTGAAGAAGGGGCTAAAATTGAAGTGACTGATCAAAAATCCTTCTCTGGTGGTGGTGCAACTAATGCTGCCGTTTCATTCAAAAAACAAGGTATAGATGTCAGTTTTTTTGGCAAAATTGGTAAAGATATCGCTGGTGAACAAATTACACAAGAACTAGAAAATCATGGTATAGATACTTCTAATATTCGTTACTCTAATAAATATGGTACTGCTACTTCATATGTAGTACCTACGTTAAGTGGTGATAGAACAATTTTTGCTTATCGCGGTGCTAACAAA…
FTT0802	FLH204530.01X	FtCD00022803	DQ681880	cphB	Cyanophycinase	ATGCCTTCTAAGCCAGTGAAAAAAGACCACCGTGGGTATATAATGCCGATTGGTGGTGGCGAAGATAAGTTCGCAAGCCCTACTGTTCTAGAGAAATTTGTCCAGTTATCAGGTGGTACTGAAGCAAAAATTGCTGTTATTCCAACAGCATCAAAACTTCCAGATACAGGAGATATTTATGTAGATATATTTACAAAAATGGGAGTCAAAGAAGTACATAACCTAAAAATAGAAACACGTCTAGATGCTACTACTAATAAAGAATATCAAGATATACTTTCTCAGTGTACGGGTATCTTTATGACTGGAGGTAACCAGCTTTTACTTTCAACTACTCTTGGTGGCACGCCAGTAGCACAACTTATTCGTAGATTAAATGCAAAGGGTGTAAATGTTGCT…
FTT0803	FLH231428.01X	FtCD00039347	DQ681881	ans	Asparaginase	ATGCAAAAAATTATAATCCATGGTGGTTGTGGTGCTAGAGAAGACAAAAATACTTCTTTTGGAGATTATCACCAGCATCTTTTACCAATTGTTGAAAAAGCATATAACTACCTAAAAGAAGTAGATGATGCTAATGAGGCAGCAATTTTTGCTGCTAAACTTCTAGAGGATGATGAGATATTTAATGCTGGTACTGGTTCGCGCGTGCAGCAAGATGGACAAATCAGGATGTCTGCATCTATCATCGATAGTCAAAAACAAAAGTTTGCTGGTGTTATAAATATTCAAAATATCAAAAATCCAATAGAAGTTGCAAATAGATTAATGCAACAACATCATAGCATCCTTGCAGGTGATCAAGCTACGACATTCGCTCATGATGTGATGGGTTTACCAATT…
FTT0804	FLH157032.01X	FtCD00021062	DQ681882		major facilitator superfamily (MFS) transport protein	ATGAAACGCTTTTCCAAAAGACATGTTTTTTTTGCTTCGGCAAGTACTATTGTTGAGTGGTATGATTTTATGCTTTTTGCATATTTAACTCCTGTGATAGCAAGTATATTTTTCCCCGATTTTAGTAAATATACGGCAATTCTTATGACTTTTGGGGTTTTTGCTGCAGGATTTTTGATGGGACCTATAGGCAGTGTGGTTATGGGTAGTTTTGGTGATCGCTTTGGCCGTAAAAAGGCGTTGGTGATATCTATTATTATGATGATACTACCAATGCTAGTGATAGCTATATTACCAACTTACAGTAGTATTGGAGTTTTGGCACCAATTATATTGGTTGTAATGCGTTTATTACAGGGGTTTTCTATTGGGGGATCTTATGGTGGCGTGATGGTTTTT…
FTT0805	FLH231408.01X	FtCD00039338	DQ681883	capB	capsule biosynthesis protein capB	ATGACTACTTTGGATTTTTGGTTAATTGTCGTCGTATTTGTGATTTTATGCGTTTATCTAATAATAGAAAATATAGTGCATAATAATAGTATTAAAAGTATTCCTATTAGGATTCATGTCAATGGTACTCGTGGTAAGTCAAGTGTTGCGAGACTTATTGCAGCTGGTGTTAGAGCTGGAGGATATAGAACAGTAGCTAAGACTACTGGAACTTTAGCAAGATATATTGATGTTGATGGTTCAGAAACACCTGTATTTAGAATAGGCTTTAGTAATATTGCTGAGCAAGTTAAGATTATGTTTAAGGCAAGAAGAGCAAAAGCTGATGCTATCGTTATCGAGTGTATGGCTTTGCAGCCACTTTTGCAATCGCTGTGTGAGTTAAAGCTTATTAAAGCG…
FTT0806	FLH231402.01X	FtCD00039335	DQ681884	capC	capsule biosynthesis protein CapC	ATGGATCCGTTAACGCTCTCGATAGGAATTGGTCTTGTAGTTGGTCTAGTTTTTGTGTCACTATTAGGACTATCTACAGGTGGTATGGTTGTACCTGGATATTTTGCTCTAGAGATGGGGGCTCCTGATAGAGTTATAGTAACTATTATCATCTCAATAATTATATTTGGTATAGTCAGATTTATGTCTAAATTTATGATTATTTACGGTAGACGAAGAATTGCTATTACAGTACTTTTATCATTTATCTTAGGTACTGTATGTAATATGCTTTTTTCACAATATCTGACTACGAGCTTTTACTCAAACCAAGTTCAGGTAATTGGTTATATTATCCCTGGACTTATAACTTTATCTATAGATAGGCAAGGACTTATAGAAACAATAGGTTCTTTACTA…
FTT0807	FLH231406.01X	FtCD00039337	DQ681885		conserved hypothetical membrane protein	ATGAAAACGATGTACTGGCACCGTAAATTTTTATCGCGCTATATAATAGTTTTTTTAAGCGCATTTATGATTATATCTTTGTATATAGTAGAGAAGAATCTAGTTGTTGAAACAAAAGGTTATACACAAAAGCTTAAAGCTGCTGAATTAACTAACGACGCATTTGCATTTACACAGCGCTTTTTTATGTCAAATGGCTATCTATGTAAGACAATGGGAGATGTCTCTTGTACTGGGTTGATTGGGTTGTCAATGACTGAGATAACCACAGATTCTGGTGATCTTTATGCAAAGAGGTCTTCGGTTAATCCAAATATGGCTGCAATATTTGTTGAATGGTTAAGTGAACTTAATCTTAAAGAGGGTGATACAGTTGCTGTGCAAGCAACCGGGTCATAC…
FTT0808	FLH230042.01X	FtCD00039278	DQ681886	spoT	Guanosine-3',5'-bis(Diphosphate) 3'-pyrophosphohydrolase/(p)ppGpp synthase	ATGCTAAATATGTTTTGTTTCTATGACCTTAATCAATTAATTTCTCAATATCTTCCTCATCGAGAAAGGCTAAAGATAGCTCAAGCATTTATATTTGGTGCTGATGCTCACGAAACTCAAGTTAGAAGCTCAGGGGAGCCTTATTTTACCCATCCTGTTGCTGTAGCATGTATACTTGCTGAGCTTAGGATGGATGTTGATACAATAATTGCAGCTTTATTGCATGATGTCGTAGAGGATACTGAGTATACAGTTGACGATATTAGTAATATTTTTGGTAAAAAAGTTGCTCAACTTGTCGAAGGAGTAACTAAACTTACTCAAATTAGGCATAAAAACCGAGCGGAACAACAAGCAGAAAACTTCCGCAAAATGTTACTATCTGTGACAAAAGATGTT…
FTT0809c	FLH157810.01X	FtCD00021156	AY774472	recR	Recombination protein recR	ATGACAAGCAAAATTTTTTCTCCGAAAATTAGCGCTGTAATAGAATCTTTGCGTAAGCTACCAACTATTGGTAAAAAATCATCACAAAGACTTGCTCTATATCTACTAGATAAATCACCTGAAACAGCAATAGCTATTGCCAACTCGCTTTTAGATGCCACAGCAAATATCAAAAAATGTGTATATTGCCAAGCACTTACTGAAGACGATGTTTGTAACATATGTAGTAACACTAATCGAGATAATACCAAACTATGTATAATAGAAAGTATGCTTGATATGATTGCTATTGAAGAGGCTGGTATCTATAGAGGTAAGTATTTTGTATTAAATGGTAGAATTTCTCCACTAGATGGCATAGGTCCAAGTGAATTAAAGCTAGATATCTTACAACAAATT…
FTT0810c	FLH157651.01X	FtCD00021138	AY774480	ybaB	conserved hypothetical UPF0133 protein ybaB	TTGAACTTTGATATGTCAAAGCTAATGCAGCAAGCACAGAAAATGCAAGAACAAATGAAAAAAGCTCAGCAAGAGCGTGAAAATATGGAAGTCATTGGTGAGTCTGGCGCAGGTCTTGTTACAGTAACAATGACAGGTAAATATGATGTTAAGTCGGTAAGTATCGACAATTCACTCATGTCTGAAGATAAAGAGATACTAGAAGATTTGATAGCAGCTGCTGTTAATAGCGCTGTAAAAAAAGTAGAAGAAAATTCGACAGCATCTTCAGATATCTATAAAATGGCAAAAGACGCTGGTATCGACTTACCTAGTGGCATTAACTTTCCTTTTAAATAG
FTT0811c	FLH157634.01X	FtCD00021136	DQ681887	murG	UDP-N-acetylglucosamine--N-acetylmuramyl-(pentape ptide) pyrophosphoryl-undecaprenol N-acetylglucosamine transferase	ATGAGTCTAGAAAATAAAAACATAATTATAACAGCTGGTGGTACAGGTGGTCATATATACCCCGCACTGGCAATAGCTGAATTGCTCAGACAAAATAAAGCCAATGTGACTTGGGTTGGCACTCCTAACAATATGGAGGCTTCAATAGTTCCCGAGTATTTTAATATTCAATTTATTAAATCATCCGGTGTTAGGAGAAAAGGGATTATAAAAAAAATTACTTTTCCGCTAAAGCTTGCCTACAATACCTTAAAATCGCGTAGTCTATTAAAAAAGCTTAAAGCAGATTTAGTGATTGGTTTTGGTGGTTATGTTTCTGGGCCAATATGTCTAGCAGCTGCTCAAATAAATATCCCAGTAATAATTCATGAACAAAACGCTAAAATAGGTCTAACAAAT…
FTT0812	FLH157698.01X	FtCD00021143	AY774463	gcvH1	glycine cleavage system protein H	ATGACTGAAATAAATCAAAATTACTTATATACAGATTCGAATTTATGGGTTGAGGTCAAAGGTAATATTGCAAGAGTTGGTATAGATGATTACTCCCAAGATGAATTTGGAGAAATTGTCTATGTTGATTTGCCTAAACTTGAACAAGAGTATGCCAAAGATGATGAGATTTGTGTTATAGAATCTGTAAAGACCGCATCTGATATTTATACACCTCTATCTGGGAAAGTTGTAAAAATAAATCAACAATTATTAGATAATCCAAAGCTTATAAACGAGTCTTGTTATGATAAGGGTTGGCTATTTGAAATTGAAATAGCTGATCTAGATGAGCTTAAGAGCTTAATAAATCCTCAAGACTATCAAAGCTATGTTAGCTAG
FTT0813	FLH157620.01X	FtCD00021133	DQ681888		hypothetical protein	ATGTTAGCTAGAGTTTTATTAATTCATAGCTTAATTTTTTTATCATCATCTGCTTTTGCTCTAGAGCAATATCTTAATTATTGTAAGATATATAATCCAAAGAAAGGTATCGAGTATGAAACCCACACTAAGATATCTGTAGATTTTTGTAAATATTACTTAGAAAAATGTAATAAAGAATATGATAATAGATGTGTTGCTAAAATGAATGCTTATCAGGGACTTTATAATACTAATAATGCTTTGGCTACTATGCATGTATTATATAATGATGATCTTGACAGACTGAACAATTAG
FTT0814c	FLH204487.01X	FtCD00022779	DQ681889		hypothetical protein	ATGATGGATTTCAAAGACCAATATAATATTAGCTCAGATGGCAAGCTTTATATTAACGCAAAAATAATGTCTCATAGCTCTGCAACTGCTAATGTAACAGTAGTTCTACAAGATCAAAATGGTAATCAAGTTTATAGAAAAACAGACATTCAGATCTCTCCTATGGATACATATGATCTAGCTTTAGCGATTGATAATATCAAAGCTGGAGACTATAAACTTATTATCTCAAGTGAACTTGCTGGAGCAGAAGCTTGGCAGAAGGATATGAACATTAAAGCAGTAAGTTCAGAGACAAGTGATGATAATAATAATCCTCCGCCAGCAAACCAAGATATTAATGTTAACATAGAGTCAAACACACCTTACTATCAGGTTAATCCAAATGATTCTGTAACC…
FTT0815c	FLH157604.01X	FtCD00021131	AY774462		hypothetical protein	ATGACAGATTATCCATTACTTACAGTACCTAAAGCAATAAGTACAAATGATTTGTTCTTAGAGCTTACTGAAAAAATTAATAAAATTAGTACTGAGCAGCTTAATAACCAGATTATTGCTGGTGTTAAAGATAGTAATAATGCTGTTATTCCTAATGGCAATGCTGTATATATTTACCAAACAGCAGACAAACCATATGATCAGATTAGTTTTTACTATCATCAAGCTAACCAAAACTTAAAAAAATAG
FTT0816c	FLH151508.01X	FtCD00020463	AY774908		chitin binding protein	ATGAAATTAAACAAAATTACATTATTAACTGGCTTAGCGTTATTAGTCAGCTCAGAAGCATACTCACATGGTTATGTCGAAAGTCCAGCTTCTCGTGCATTATTATGTAAAGAAGGCAAAAATAAAGACTGTGGCGAAAGAGCTCAATATGAGCCCCAATCAATAGAACAAGCAGATGAGTTATTTAATTTAGGAGCTCTAGATAATAATATAGGAAGTGCTGATGTAGCAGGCTTTGAATCACTTGATGAACAAGAGCAAAGTCGTTGGGCAAAAACTGTTGTTCAACCTGGACAACCACTAAAGATTAAGTGGCAATTTACTGCAAACCATAAATCTAAGCATTTCAAATTTTATATTACTAAACCTAACTGGGATCCTAATAAACTACTTACTCGA…
FTT0817	FLH157839.01X	FtCD00021160	DQ681890	thrS	Threonyl-tRNA synthetase	ATGATGAATATCAGATTTCCAGATGGTTCGATAAGAGAATTTGAAGCCGGTGTTAATTCTCTAGATGTTGCTAAATCAATATCTCCAAGCTTAGCTAAAGCTACAATGGCTGCGTATATTGATGACCAGCTCAAAGATGCAAAAGATGCGATTAACAGTAACTGTGAATTAAGATTGATAACAGTAAAAGATCCAGAGGGTCTCGAAATTCTAAGACATTCTTGCGCTCATCTTTTAGCTCATGCTGTCAAAGAGTTGTATCCAAATACTGAAGTAACTATAGGTCCGGTAGTTGATAATGGCTTTTATTATGATTTTTCTTTCAAAGAGTCTATAGGTGAAGCAGATTTACCTACTATCGAAAAGAAAATGAAAGAATTAGCAAAAAAGTCTGCTCCT…
FTT0818	FLH157762.01X	FtCD00021151	AY774448	infC	translation initiation factor IF-3	ATGCGTCTAGTTGGTGTTGATGGTCAACAAATAGGTGTTGTATCTATCAATGAGGCTTTAGCGTTGGCTGAAGAGGCTGATGTTGATTTGGTTGAAATGGTAGCAAATGCTAATCCGCCAGTGTGTCGTTTGATGGACTACGGTAAGTACTTGTTTGAACAAGGCAAGAAAAAAGCACAAGCTAAAAAGAACCAAAAGCAGACTCAGGTGAAAGAGGTGAAGCTCAGACCTGTGACTGATGTTGGGGATTATCAGGTAAAACTACGCAACCTGATAAAATTCCTTGAAAAAGGCGATAAAGTAAAAGTCACATTGAGATTTAGAGGTAGAGAAATGTCACATAAAGAGCTGGGTATGGAAATGCTTCAGCGTATGGCAAATGATGCTGCTGAATACGGT…
FTT0819	FLH204453.01X	FtCD00022759	DQ681891	rpmI	50S ribosomal protein L35	ATGCCAAAGTTAAAAACTAAAAGTGGTGCTGCTAAGCGCTTTAAAAAAACTGGTAAGGGTGGATTCAAACACCGTTGTGCAAACCGTGCGCATATCAACACTAAAATGACAACTAAGAGAAAGCGTCATTTAAGAGGTATGAACCAAGTAGCTAAAGTTGATACTACTAGCTTAGTTCAACAAATGCCTTACGCGTAG
FTT0820	FLH157675.01X	FtCD00021140	DQ681892	rplT	50S ribosomal protein L20	ATGTCAAGAGTAAAAAGAGGCGTAACAGCACGCGCACGTCATAAGAAGGTTTTAAATCAAGCTAAAGGCTACTACGGTGCTCGTTCTAGAGTATATAGAGTAGCTAAGCAAGCTGTTATTAAAGCAGGTCAATATGCTTATAGAGATCGTAAAGTTAAGAAAAGAACATTCAGATCTTTATGGATTGTTCGTATCAATGCTGCTGCTAGACAACACGATATTAGCTATAGCCAACTAATCAATGGCTTAAACAAAGTAGGTGTTGAATTAGATAGAAAAGCGCTAGCTGAATTAGCAGTATACAACAAAGATGCTTTTGCTGCTGTTGTAGAAAAAGCAAAAGCTGCTTTAGCATAG
FTT0821	FLH231410.01X	FtCD00039339	DQ681893		conserved hypothetical membrane protein	ATGAAACATCTAAACTTCTTACTTATTAAAAGAATTTTTTTGATATTTTTTTTAAGTTTTGGGGTATTATTGTTTTTAATCTTTAATGGTTATAAATATTTTGATGTAGATAAGCTTAATCTTGCATATATCAAGGTAAGTGCCTATGTTGATAGCCATATTATTTTAGCTTGTCTTAGTTATGTTTGTGTTTATATTTTAACTGTATTTTTTTCTGTACCGGTAAAACCATTTTTAAAGATTTTAGCTGGAATTTTATTTGGATTTGTTTTGGGTTTCATTGTCTGTTTATTTGCAGCTACTATAGGGGCAATGCTAGCTTTTTTATTTATAAAATATAATTGGGGTGAAGCATCTACTAACCCAAAATATAAAATTATTTCTAAATTTAAATCTTTA…
FTT0823	FLH204493.01X	FtCD00022783	DQ681894		MutT protein	ATGTGGTATATTTTATTTTATTTGCTTGGAAAAGATAAATTAATGCATAAAGATAAAATATTTGAGTTTATAAAAAAAGTTCAAGCTATATCTCATACTGGAATAGTCTATTCTAAATGCCCATATGCTTTAGATAATTACCATGAGCTATTAGAGTTAAGCTCAAAAATGCTACATGAATATATCAAGTCAGATGTCCAGCCATATGATATCTATAGAGATATGTATTATCCTACACCGCAACCTGGAGTGCGCGTGGTTATATTTAAAGATGATAAACTTATGATGACTGAAGATGCTGATACACCTAATGAATGGACTATCCCAGGTGGTTGGTGTGATATTGATCTTTCACCTGTTGAAACATGTATCAAGGAAGTCAAAGAAGAAACAGGTTAT…
FTT0824	FLH155070.01X	FtCD00020825	AY774407	arsC1	arsenate reductase	ATCATAAAAGTATTTGGAATAAATAATTGTACAAGCGTTAGAAATACTCTTAAGTTCTTTGAAGAAAAGGATAAAAAAGTCGAATATGTAAATCTCAGGCAAGAAAAGCCTACTTGGCAAGAAATGCAAAAGATAAAGCAAATTGGCCATTTTGAAACTATTGATCTGTTTAATTCTAATGGTAAGCTTTTTGCTGAAATGGGCCTTAAAGATAGATTTGATAGTTTGTCAGAGGAGGAGGCATTTAAGCTTTTAGTTACTGATGCATTACTGTTTAAAAGACCGTTGGTAGTAGATGGTAACTATGCTAGAACTGGCTGGAATAAGAAAGAGTATGAAGAAAAATGGGGTTAG
FTT0825c	FLH151488.01X	FtCD00020459	AY774891		hypothetical protein	ATGATTATAAAGAAACTTTCAACACTAGTACTAACATCATTCGTATGTATAATGTTACTAGCGTCGTGCGGACCAAACAAAAAAGAACGCACCTTACAAGATCTTGAGCAACAGCAGCAACAGCTAAATCAACAAGCAAAAGATGATCAACTGCAAGCTAACAATCTCACAACTGATGCTGCGAATCTTGATAAAGAATCTAAAGCAGATAGCTCTAAGTCTCAATATGAAAAAGACCAAGCGAATGTATTAAATGCAGAAGCTCAACAAAATCTTTCAAAAGCTGCTAGCCTAGATGCGCAGATTGAAAAAGCAAAATCTGATGCAACGGAGTAG
FTT0854c	FLH154425.01X	FtCD00020753	DQ681895		conserved hypothetical membrane protein	GTGAACTTAATAATTGGTGCAATCTTAGGTTTTATATCAGTAGCTTTTGGAGCTTATGCTGAGCATGGTCTGAAATCACAAATCTCAGCCGAGCATTTTAATTTTATCATGACTGCTCTACGCTATAATCAAATCTATGCAATTATAATTAGTGGCATAGGACTAGCTCTAATAAGTAGTAAACATGTGGCTCAAAGCTTAATGCTTAAATTAAGTAGTTCGCTTTTTATCATTGGTACAGTACTTTTTAGTTTTAGTATTTATATCTCTATAATTTGCAATATACAAAGTCTTATGAAAATTGCTCCTATAGGTGGAACCATTTTAATGTTAGCTTGGATTAGCTTAGCAATAGCTGCTATCTCTCTGAAAAAGCGTCTATCAAATAATTTTATAGAT…
FTT0855c	FLH154361.01X	FtCD00020750	AY773998		hypothetical protein	GTGATAAAAGTTTTCTATGATGGTAAATGTGGTCTTTGCACTAAAGAAATAAACCACTACAAAAAGATAGCTCCAAAGAATATTTTTAGCTGGATTGATATAACAGAAATAGATCAATCAGTTATTGCAAAAGAAAATCTAGATGTTATCTCATGTTTAAAAGCACTCCATGTAAAAGATAATAATGATAAATTACATATAGGAATCGATGCATTTATCATAATATGGAGCCAGCTTAATAGATGGCGAAAGTTAGCAACTATTGTTAAATTACCACTGATATACAATTTTGCCAAAATCATATATAGTCTATTTGCAAAATGGCGTTTTAATCGTTTAGATCACTGTAAGATAAAATAG
FTT0856c	FLH204536.01X	FtCD00022805	DQ681896	ubiA	4-hydroxybenzoate octaprenyltransferase	ATGAATAAACAACAACTAAAAGCATATTTCATGCTAATGCGACTACATCGCCCTATTCCGATATTACTAATCTTGTGGCCAACACTTACAGCATTAGTCTTAGCAAGTCATGGACTACCAGATATTAGCTATCTAGTTATTTTCACTATCGGTGTAGTAGTAATGCGTACTGTAGGTTGTATTATCAATGATATTGCTGATGTCGATTTTGACAAACATGTAGCTCGCACAAATACTCGACCTTTAACAAGTGGACAATTAAGTATTAAAAATGCTATTTGGCTTTGTATTTCTCTTACATTAGTTGCATTTATATGTGTATTATTTTTGAACTTATACACGATTTTATTATCATTTGTAGCACTATTCTTAGCAATACTATATCCGTTTTGTAAACGA…
FTT0857c	FLH154470.01X	FtCD00020756	AY774009		hypothetical protein	ATGAATGTTATTAACAAAGAAAATCTAACTAAACAGCAAAGATATTGGCTAAATGATGCTAAAAACCTAGTTACAAGTTTATCTAAATTTTATGGCGAGATTACGCTAGATAAAATTTCACAGCAATTTACTAATATAAATTCTCTTGAGCAATCTCTCTTAGCAACTCAAACAGCACTAGTAAGACAAATTACCCTCTCTAGTATCAATCAAACCTTAGTTTTTGCTAGGACGATTATTCCTGATAGTACTTATAAACATTTTACTCAAGAGCTAGATAACCTTGGTACTAAACCTATCGGTGATAATTTGCTCTTTGATAAAGCTAAATTTGCTAGAGATGAATTTATAATTCGTGAACTAACTGTTAAAGATTTTTATAATGAAACTAATAGAGAT…
FTT0858	FLH154277.01X	FtCD00020742	AY774006	rph	Ribonuclease PH	ATGCGTCCAAGTGGTAGAAATAATGATCAACTACGTAATCTAAAAGTTACACATAATTTTACAAAACATGCCGAGGGCTCTGTCCTTATTGAATTTGGAGATACTAAAGTTATCTGTACAGCTTCTGTAGTTGCAGGTGTACCAAAATTTAAAAAAGATAGTGGTGAGGGTTGGCTAACAGCAGAATATGGCATGTTGCCGCGTTCAACTCATACGCGTATGGATAGAGAGGCAGCACGTGGTAAGCAATCTGGAAGAACTCAAGAAATTCAGCGCCTGATAGGTAGAGCATTGCGTGCTAGTGTTGATCTTACAGCTATCGGGGAAAATACTATTAAGGTTGATTGTGATGTGATTCAAGCTGATGGTGGTACGCGTACTGCATCGATTACCGGCGCA…
FTT0859c	FLH204466.01X	FtCD00022769	DQ681897		hypothetical protein	ATGTCAGAACAACAACCACGTAAAAAACTATCATTAGGCGATAGAAAAAAACCATCTACAACTAGAGTATCTAGTCTAAGTGTTAACCTTAAAACTAAACTACAAGCAAAAACAGAAGATAATATACAAAACTTCTTTAAAAATACGAATAAAGAACTTCGGGAGCTATATCAACAAAGAAAAACTCTCGAAGAGCAAATCAAACAAATAGAGCAAAGACTATTGTTTGCCAAGAGTGAACCATTGCAAGATTTTTTATTTGAATTAAAATCAAAAGATTTTGAACTACTTGTAAAAATTAATTCTTTTATAAATAACCTGTAG
FTT0860c	FLH154313.01X	FtCD00020745	AY774021		hypothetical protein	ATGTCACTTAATTTTGACTATTATCCAAGAACTGGCGATGACTCAAGTAACTTTGAAGTCTATCTAGGCGATCAACTAATTTATACACACAATAATTTCTCACAAGAATGGCAAAAAATAAGTATAGATCTGAGTAATGTTGAAAATGCAGAATCTTCGAAACTTTCAATACGAGAAGCTGGTAGAGATGAAAGCTACGGTGCGCTTATTGATCTAAATTCTTTAAAAATCACTCCCGGAAAAATTGTTTAG
FTT0861c	FLH154528.01X	FtCD00020762	AY773995		Type IV pili fiber building block protein	ATGATTCGAAAACATTCAAAGCTTTTACAAAAAATTAAAGGAATGACAATCTCAGAGCTAGTTATAACTTTGACGATAATTAGTATTTTAGCGGTGTTTGTAACGTCTACCTATTCAAACTATGCGACTAGAACAAAGATAGCTAACCAAGTATCTTTGGTAACAGCACATGCACGTCAAGTGTATGATCTCAAAAAAGATGGTAAGGATTTTTATCTGAACTTCGATAATTCTACGGTTAATGATTATGGTGCAGTTACAAAAAATATTGGTGAATCAGGAGCTAATATTATTAAAGGTAATGCTGAGGTTATGATACGTCCAGAAGCAGTAGATCCTGATTCTGTACGCTGGCGTTGTATAGTTTATGGCGATGGCTTATCAGAATCAAGCATACCT…
FTT0862c	FLH231404.01X	FtCD00039336	DQ681898	htpX	heat shock protein HtpX	ATGTCAGCTGCTGATAATTTAGAATATGGCTCTGTAAATTGGCGCGAAGTTGTACGTAAGAACACTTATCGCACTTATTTTGTAATCGCAACATTCCTTATAGTATTTTTCTTATTAGGAATCTTTATTGATACAATATGGCGCTATAGTGAATTTGTAAATGCACACTACAGTTATTATAATAGTCAGCCACAAATATCAATAGGGAAAGTATTCTTGTTGTTATTGACATTTCAAATACCTCCTTATGCGACTATGATAATCTCTACTGTAGCAGTAATTTGGGTATTTGTTACATTTAGCATGTACGATAAGATCATGCTCTCTGGCACAGAATATCAAGAAATTACTGCAGATAATCAAGATCCACTAGCTCGCCGTGTTTATAATGTCGTTGAA…
FTT0863c	FLH151696.01X	FtCD00020498	AY774906		LemA-like protein	ATGTCTATAGGGATAATTCTACTCATAATAGTAGTTGTAATAGCGGTATATGTGGTTATGACATACAACAAGCTAATTACGGAAATTGAAACTGTTAAAAACTCTGAGAAACAAATAGATGTACAATTAGATCGACGTGCTAAGGTATTTGACTCGTTAGTTAATGTGGTCAAAAAATATATGGACTATGAGCAAACAACTTTAAAGCAAGTAGTAGCGCTGAGAAACCAAGCTAATCTTGCCAAAGAAAACGGTGATATCCAAGAAAGAATAAATGCTGAAAATAAGATTTCTGATCTTGCTAAAGGAATAAATGTACAATTTGAAAATTATCCAGAGTTAAAAGCTAACCAGAATGTAATCCAGCTTCAAGAAGAAATCACCTCTACTGAGAATAAG…
FTT0864c	FLH204450.01X	FtCD00022756	DQ681899		transcriptional regulator, LysR family	ATGCGTATCACTCTAAAACAGCTTCAAGTGTTTGTAAATACTGCAAAATCAGAATCGATTAGTGCAGGTGCTGAAAAATGTTTCATCTCTCAGGCTGCGGCTAGTATGTCGTTATCACAGCTTGAAAATATGCTTGATACTACACTGTTTGATAGAGTTGGCAAACGCATGAAGTTAAACGCAAATGGTAAAAACCTCTTAGCTAAAGCTATTAAGATTTTAGATGAAATAGAAGAATTTGAAACATTTAGTGTAAAAAACACTCTACTATCTGGAAAAATAGTTATTGGTGCAAGTACTACAATAGCGAACTATGTTTTGCCTAAATATGTAGCAATCTTTAAAAAACTACATCCAGATACTGATTTTGAAATTATCAATAATGTTGAATCATTAAAC…
FTT0867	FLH204512.01X	FtCD00022794	DQ681900	isftu2	Transposase	ATGAATTATCATATAAAAGAAGTATTCTGGTCAATTATTTTATCATTCTTAAAATCACAAAAAGGTATACATACCAATGATGAAGCCAAATTAAGATTGTTTATTGAAGCTGTATTTTATGTGTTACGTACAGGCTGTCAATGGAGAATGTTACCATTTTATTATGGTAAATATAGATCAATACATAAGCGTTTTAAAGATTGGTGTGATAAAGATATATTTTCTAGATTATTTAAATCAGTACAAAACCCTGATTTACAAGAAGTCATGCTTGATTCAACAATAGCAAGAGCACATGCTTGTGCTACGGGATATGATAAAGATGATAACCAAGCAATTGGTAGATCAGTTGGTAGGATAACCACTAAAATCCATGCTATGACTGATGCTTTAGGTAAT…
FTT0868c	FLH155798.01X	FtCD00020904	AY774220		arsenical restistance operon repressor	ATGAAATTAGCCAATATTGTTGACTTCCAAAAAGCTTTGGGAGATGAAACTAGGATTAGAATTCTAATGGTAATCTATCAACATCAGTTATGTCTTTGTCATTTAGCACATATTTTTAAACTTGCTAACTCAACCCTATCTAAACACCTAGATATACTAAGGCGTAATGGTTTTATTCATAAGCGTAAACAAGGTAGATTTCATTACTTTTATTTTAATTCTGCTTACCAGCAGCAGCTAAACTGGCTTTTTGATATCCTTGCAGATGATGAAATTATTCAGTCTGATCAAAAACTCGTAAAACAGCTAATAGCTCAAGAACTTGAACATCTACCAGAGATACATGCAAATGAGAATATCCTATAG
FTT0869	FLH204495.01X	FtCD00022785	DQ681901		hypothetical protein	ATGTTCAAAAGAGTAATTTTAGTTTTAATAACTTTTATTTTTGCGATAAGTTTGAATTATAGCTATGGAGAATATGCTAATAAAACTTATATACAAAATGTTGTAAAAACATTTAACTTATCAACTGATAAAAATATAAAAATATTAGATATAAAAGGTTATCAACAAACTACTGATTATACTTGTGGACCATCTGCTGTTATGAGTTTACTCAATTATTATGGAGTCCTCAAAGATTCACAGATGAATCATCAAACTGAGTTAGAGATAGCTAAACAAATGGGTACAAATGATGATTATGGCACTACAATGCAACAAATTGTTGAATGGCTTGGAAACCATGGTTTTGAAGTAAAATATGCAACAGATGGTGATATTAATTTACTCTATCAAAGTATA…
FTT0870c	FLH204449.01X	FtCD00022755	DQ681902		hypothetical protein	ATGAAAAAAATTATATCAATAGCGTTAATAACTTTTAGTATTACTACAACTGGATTTAGCTATAGTTTACACCCAATAAATAGTTTCTCTAGCCAATCATTCCCTGAGCCAGTATTAACCTTAGCAGCGTAG
FTT0871	FLH151564.01X	FtCD00020476	DQ681903	gpsA	Glycerol-3-phosphate dehydrogenase [NAD(P)+]	ATGCAAAAAAATATACTTGTTTTAGGGGCAGGAGCTTGGGGTACGGCACTAGCATTACAGCTTGCTTATAGAGGACATAATGTCAGAATTAACTCATGGAAAGCTGAGCATAATGAACAAATGCTAAAGGATAATAACAATCATAAATACCTACCGAGTATAGAGAAATTTCCTTCTAGATTAAAAGCTATTCAAGATTGGCAAGCTAATATCATTGAGTTTGATAGTATACTAGTTGCAACTCCAAGCTCTGGTTTTAAGAATACTATTTTAGAGCTAAAAGAATGTATCTTACCGCAGCAAAACATTATTAGTGCAACAAAAGGTTTTTGTCATGATAGTTATGCGTTATTAAGTGAAATAGCTGAAGATATTTTGCCAACTACAAAATTTGCGTTA…
FTT0872c	FLH156003.01X	FtCD00020932	AY774230		hypothetical protein	ATGGAATTTCTATCAAGCCTTAATTTTTTAGATATTTTAATAATGATAGTCATCTTAATCTTAAGTCTATTTGCCGCTGTTAAAGGATTATTTAAAAATATTGTGCTATTACTATTGATGGTGTTTGCCGTTGTTTTATCTGGAATTTTAGCACAAAAAATCCAGCAAATTTATGTCGGCTCATTAATTGAAGATCCAGGCACAGCTTATGTAGTATCATTTATTTTGGTGCTACTCTGCGCTTACTTAATAATTTTTGGTATTATGAAAGTATTTTTGCGCAATAATAAGGAAAAAGAAAGCCTTTCAAATACTTTGTTTGCCTTTTTTATTGCTCTAGTGCGTTTTAGTTTTATATTTGCTATAGCTTGCTCGACACTAAATTCTATTGATGCTGTC…
FTT0873c	FLH155968.01X	FtCD00020926	AY774211	radA	DNA repair protein radA	ATGGCTAAGCAAAAAACAGTTTTCATATGCCAAGAATGTGGCGCCACATCTCCACGCTGGCAAGGTCAATGCCATAGTTGTAACCAATGGAACACTTTTGTAGAAGAGCTTAAATCAGATCCCAAAAAAGTAGTTAAATCTCGCGCTGGATTTGCCGGAAGTATTTCCAAAGCAACATCACTATCAGCTATCAAAGGTAAAGAACATTCTCGAGTATCTACTCATATCGGTGAGTTTGATAGAGTCTTAGGTGGTGGTATTGTCAAAGGTTCGGTAATCTTGGTTGGTGGCGATCCTGGTATAGGTAAGTCTTCGATATTACTACAGATAATGTCTTTTTTATCTTTACAAAAAAAAGTCCTATATGTCAGTGGTGAAGAGTCATTAGAGCAAATAGCA…
FTT0874c	FLH155786.01X	FtCD00020902	AY774214		hypothetical protein	ATGAGTAGATTAGATCTGCTAAAAAAAGCAACTCCACAGAGTAAAAAACCTCAAAATACGACTAAAAGAAATCCACGCGGAGGAATGCTAGCTGAGAAAACCCAAAAATCTCAACAACGCATTGATGATTTAAATGATGATATCTTAGCTGAAAATGATTTTGAAAATGAACTAGAAGATACACCTATAACTGAGTATCAAATAGATGATGATACAAATAATGAAGAGTCACAAGAAAATATCAATATAATTGAAATTGATATTGATCAAAGTGAAGGATTAGCTATAGATCCAACGTTGATTAGTGAAGATGATGAAAGTAGTGAAGATGAAAGTCCAAAACAAAAACCATTGTCAGACAATCACTCTGTTGATGATAGTGATGATTATGAAGCTAAT…
FTT0875c	FLH155669.01X	FtCD00020889	AY774194		hypothetical protein	ATGAGTGAAAGTGAATTCTCAAGCTTACTAATTGATTGGGGATATTTAGCTATCATGCTAGGGGTTTTTATCGAAGGTGAAATATTCTTAATTATGGTAGGTATCGCAACTGCAACAGCATTATTTAGTTATCCTCTAGCAATTCTAGCAGCAACATTTGCCGCGATTTTACATGATAATGGTCTATTTATATTTTCTAAATTCATGGGCAAAAAAATCTTTGAGAAAAAAGCATCATGGCACTATAAGGCTCAAAAATCACTAGAGATTTTAGATAAGTATGAATCTTTAGCAATCCTTAGCATTAGATTTTTGTATGGATTACGCACTATAACTTTGTTGGTAGTTGGGCTTAGTAAAGTAAATAGAGTTAAGTTTATCTGCCTAGATAGTATTAGT…
FTT0876c	FLH155880.01X	FtCD00020914	AY774216	aroC	chorismate synthase	ATGTCGGGAAATACTTTTGGTAAAATTTTTACAGTAACCACTTGTGGCGAGAGTCATGGCGATTCACTTGCAGCTATTATTGATGGCTGTCCTAGCAATATACCTCTTTGTGAGGCAGATATTCAATTAGAACTAGATAGACGCAAACCAGGCCAATCAAAATTCACCACTCAGCGTAAAGAGCCTGATGAAGTTAAGATAATTTCTGGTGTTTTTGAGGGTAAAACTACAGGTACGCCTATCGGTCTGATAATAAAAAACCAAGATCAAAAATCAAAAGACTATAGTGAAATAAAAGACAAATTTCGTCCTGGTCATGCTGATTATACCTACTTCAAAAAATACGGTATTCGTGACTATCGTGGTGGTGGTAGATCATCAGCAAGAGAAACAGCAATG…
FTT0877c	FLH155676.01X	FtCD00020890	AY774198		hypothetical protein	ATGATATTATTAAATCAATTTATCAGAAGCTGGAGCTGTACTATTAATACTCATTTTTTTGGACAAATAGCACTTAATGCTTCTTTTTTGCTTTATTCTGTTCAATTTATCCCTCAGGTTATCCATAATTTCCGAAACCGCCAAGCATTATCAAATATTAGTATTTTGACGCAGTTTGGTATTTTTATTACCGTATTATGTAATATAGTTGAAACTATAGGATTTGGCTATGAGTGGCAATATGCTGTCGTTGCTATTATCTATTTACTTGGAGTTTGTATACAGCAATTACAGATATCTATATTTTGTAAAAAAATACCAGAAATAGTTAATATTAGTTTTATTTTCTTATTTGCTATAGCTATGCTCGCAATGGGTTCAAACTATCACTTAGTTTAC…
FTT0878c	FLH155980.01X	FtCD00020927	AY774218	msrB	peptide methionine sulfoxide reductase	ATGAAAAAAATTATTCTCATATTAGCATTTATACCGATTATCACTTTAGCTGATACGCAAAACTGGCAAAGCTTTGATAAGACACAAGCATTAGCTAAACTAACTAGGCTGCAATATTATGTGACTCAAAAAGGTGGTACTGAAAGAGCGTTCAATAATAAATACTGGAATAATCATAGGCAAGGCATCTATGTCGACGTTGTCTCTGGAGAGCCACTTTTTAGTTCTACTGATAAATACGATTCTGGCACAGGTTGGCCAAGTTTTACTAAACCTATTGATAACTCATTTATAAAAACAAAAACTGATAATAGCTGGTTTATGACTCGTACAGAAGTTCTCTCACGCTATGCTAATTCGCACTTAGGCCATGTCTTCGATGATGGTCCTCAACCTACT…
FTT0879	FLH151664.01X	FtCD00020490	AY774939	sodC	superoxide dismuate (Cu-Zn) precusor	ATGACTGCTTTTTATAAATTATGTGGAATGAGTATGCTTTCACTTGTATTAGCAGACTGCACATTCTTGTCAGCAAATAAACCTTATGATCGCGACCATGATGGCGAGTTAATTGTACATATGAAAGATGTCAATACTCATAAAGAGGTTGGAACAATCACAATATCACCATATATTCATGATGGTAACCAAGAAGGGATGTTGATTACGCCACATTTATATAATTTACCTGCTAATACTACTCATGGCATGCATATCCATATCAATCCTAGTTGTGAAGATAATGGTATCGCAGCAGGTGGGCATTGGGATCCAGATAATACGCAAAAGCACCTTGGCCCATACAATGATAATGGACATAAGGGCGATTTGCCTGTACTAGTTGTTAACGCAGATGGT…
FTT0881c	FLH204519.01X	FtCD00022799	DQ681904		amino acid permease	ATGGCACTTGCTAAAACTCTAAAACCTCGCCACATAGAGCTAATAGCTCTAGGCGGTATAATTGGCTCTTGTTTCTTCTTAGGTACAGGTTACGTATTAGCAGAAGTTGGACCTGCTGCTATTTTAGCCTATATTCTAGCCGGAATTATCGTATACGCGGTGACTCTGTGTTTAGCCGAGCTAACAGCCAATTCCCCAAATTCTGGATCATTTATATACTACACTGCCAAATATGTATCACCAGCGATAGCATGCGGCATGGGCTGGTCATATTGGCTTAATTGGATAATCTATATCCCTTCAGAATGTATAGCTGGTGGGATAATCATGCATACTTTTCTACCTGCAGTACCTACCTATATGTGGGCTACTTTGTTTGGCTTATTTATAACTATCATA…
FTT0884c	FLH204496.01X	FtCD00022786	DQ681905	aspC1	aspartate transaminase	ATGCAATTATCAAGAAGAGTAAAGGCAATGCAAGCCTCTCCAGTACGTAAGTTAGTGCCGTATTCTATTCAAGCAGAAAAACAAGGTAAAAAGGTATACCACCTTAATATTGGTCAGCCTGATATCAAAACTCCTAATGAGTTTATGGATGCTATCAGAGCTTGTGACAAAGAGACTATCGCCTACTCTATAGCAAGTGGTGAGCCAAGCTTAATCAAGGCTATATCAAAATACTACAAAAGATTTGATATGGACTTTGCTGAGGATGAAATCTTAATCACTAACGGTGGTTCTGAAGCGCTAATATTTGCTGCGATTGCTACTTGTAATGCTGGTGATGAGATACTTGTACCAGAACCTTTCTATACAAACTATAATGGCTTCACAACTGCTGTTGAT…
FTT0885	FLH155803.01X	FtCD00020905	DQ681906		cation transporter	ATGTACTTTGCTCAATCTTTGACAGTCTTACTAGATACTGGCTACTCGGTTATATCAATATTAATTTATGCGGTATCAATATATGTTTTAAGAAAGATTAATCAACCTGCAAATAAATACTATCACTATGGTTACTATCGACTAGAGCCTATATTTATTATGCTAGAATCTTGGTTTGTGTTACTTATAGCTTTTAGTGTGATTTTGATAGCGCTATTTAATATTTTCACACATACAATCAAGCCAAATTATGGTATAGCGTTGTTATCGGAAATTGTAGGTACTGTTGTATGTGTTGTGATGTTTTTGTTTGTTAATAAAAGAGCCAAAAAGACAGGCTCAAAGATTTTGTTTTCTGATGCATTAATGTGGAAGGCTGATGCTTTATTAGGCGTTGGT…
FTT0886	FLH204535.01X	FtCD00022804	DQ681907		DNA repair protein recN	ATGCTACTACATTTATCAATCAAAAACTTTGCGATTATAAAATCTACTGAAATTGATTTTAGAGAGGGTATGACTGTACTAACAGGTGAGACTGGCGCGGGTAAGTCAATTCTACTTGATGCGCTTAGTTTTGTACTTGGTGCAAGGTTAGAAAAGACATTTCTACAAGATGATAAGCTGACAGAAGTTTCGGCTACTTTTTCTATCAAAGATAATCACAAGGCAAAACGTCTTTTAGATGAGCTTTTTATTGATTATGAAAATGATGAATGTACTTTTAGAAGGGTGGTTAATAAATCTAAACAGAGTCGCCTATTTATAAATGGTAGTGTTGCCAAAGCTGCAGATGTCAAAAAAGTTTCAGATAAGCTGATAAATATCTATAGTCAAAATTCGCAT…
FTT0887c	FLH155812.01X	FtCD00020907	AY774228		hypothetical protein	ATGAATTGTCACAACCAAGCTCTAAACGCATGGCAACAACGTACAGCTATCGCTGCGGCTCAAGACCAAGACTATAGTGATTTAAAAAATAATATGGATGCTGCTGAAATTAGAGCTGATACTGCATTTAGTGATTATAACAAATACCAAGATATCGCTAATTATCAAAGTACTATCGATCACTATCAAGGACTTATTGATAATGCTACAAGTGATGACGAGATTGCACAATATGAAAGCGCTATTCAACACTATCAAGGTCTAATAGATAGTGTCCAATCTTCACTATCTAGTCAAGCTGGCAATTATTATAGCAACGCTCAAGAAGCTGCTACTTTCTTTAATCAACAGCGCGATATCTATAACTATAAATAG
FTT0888c	FLH155660.01X	FtCD00020888	DQ681908		Type IV pili fiber building block protein	ATGATAACTGTAAAATCAAAAAAAGGTTTTTCACTTACTGAGTTACTTGTTGTTATAGCTATTATAGGCATTTTGTCGATACTAGTTATCCCAGCGTATTCAAACTATGTCACTAGAACAAGATTGACAGAAGCCTTGACAGTTTTAGATGGTTATAAAAAAGATGTCCAATCTTATTTTATTGCGCATGGTGTCTCAACCCAAGAACAGTTAGAAAATTATGATGTCACAGATCATGCTGATGTTGGTAGCGATACTACTAGCGTAATGAGTAATATAGTAGGTCATAACGGTAGAATAGTTGGTGTAAGCACGATCAAAGGCACAACTTACCAAATAGCTCTAACTCCAAGGATAGAGGGTGGTACATTCAACTGGACATGCTCTATTTCAATAGTT…
FTT0889c	FLH155932.01X	FtCD00020920	AY774182		Type IV pili fiber building block protein	ATGCAAACACACACACAAACAGGTTTCTCACTAGTTGAGCTAATGGTAGTAATTGCAATAATTGCAATCTTAGCAGCTGTAGCAATACCGATTTACTCAAGCTACAAAGAGCGTGCTGCAATTATCGAATCTATGAACATAATTGGTAATGTCAAAGCTAGTATCCAAAATGATATCAATAATAATCTAGATATCTCCCAGCAAACTTATGACACCCCTACTGGAGTCACTGTAACAGGTAGTACGTCAGGAGCTACTATTGATATAAATCTAAGCCAAACTTCACCACAACACTTTACCAACGATAATGATATTATCAGACTTAGTGGTGTAGTTGTTAGTGGTAGCACTTTCCAATGGACTTGCTCACATAATGTCAACGCCTCAACATTAACAGCT…
FTT0890c	FLH155867.01X	FtCD00020912	DQ681909		Type IV pili fiber building block protein	ATGAAAAAGAAAATGCAAAAAGGTTTCTCACTAGTTGAGTTAATGGTAGTGATCGCGATCATCGCTATCCTAGCAGCTGTAGCGATCCCGATGTACTCTAACTACACTACACGTGCTCAGTTAGGCTCTGATCTATCTGCTCTAGGTGGTGCTAAAGCTACAGTAGCTGAAAGAATAGCTAACAACAATGGTGATGCATCTCAAGTTACAATTCTTCAAGCTAATGCCGCTGCAAATGGTCTTCCAAGTGGTGCTTCAGTTGCTGCTGGTACTATTAGTTATCCATCAACAGTATCTGGTGCAACAATTCAATTAGCTCCTACAGTAAGTTCCGGTGCTATTACTTGGACTTGTAATATTTCAGGTGTATCAGCATCTCAAGTACCATCTAACTGTAAT…
FTT0891	FLH155770.01X	FtCD00020900	AY774200		conserved hypothetical membrane protein	ATGCTCAAACAGACATTACAAGCAAACTTTCAAGGTTTTAAAGATATTTTTAAAAAACCAAAACTACACAATCATAAATTGCCTAGATATCTACAGTTGAAATATACGTTTATACCATTATTAATTTTAGTAATCTTTGCATACTATAACTTAGATACCCCAGTTGAGAACTATATCAAGCATTCTATGCCAAATATTGTTGGTGTAATTTTTGGTAAAATAACTGATGTTGGTAAGGCCGAGTATATTTTGATAATTTGCGGTGTGATAGTGTTAGCGCGTTTATTTACAGATAGCCAAAAATTATCTGCTAATGCTAGAGTTATGTTTGACAAGGTGTCGGCATATGCCGGTTTTATCTTAGCAACTGTAGCTATTAGTGGTATTTTGGGACAAATA…
FTT0892	FLH155823.01X	FtCD00020908	DQ681910	folD	methylenetetrahydrofolate dehydrogenase/methenyltetrahydrofolate cyclohydrolase putative bifunctional protein	ATGATTTTAATCGATGGTAAGTCTCTCTCAAAAGACCTTAAAGAGAGATTAGCAACTCAAGTTCAAGAATATAAGCATCATACAGCAATCACCCCAAAACTTGTCGCAATAATTGTTGGTAATGATCCGGCAAGTAAGACATATGTTGCCTCAAAAGAAAAAGCCTGTGCCCAAGTTGGTATAGATTCTCAAGTGATTACACTACCAGAGCATACTACAGAATCAGAACTTTTGGAGCTGATCGATCAGCTAAATAATGACTCTAGTGTTCATGCGATTTTAGTGCAGCTACCATTACCAGCACATATCAACAAAAACAATGTAATATATAGTATAAAACCAGAAAAAGATGTCGATGGTTTTCATCCTACAAATGTTGGTAGACTACAACTTAGAGAT…
FTT0893	FLH155872.01X	FtCD00020913	AY774209	purM	Phosphoribosylaminoimidazol (AIR) synthetase	ATGGCAGGCTTAAGATATGAAGATGCTGGCGTAAATATCGAAGCTGGTAATCAAGCTGTAGAAAGAATGAAGCAGCATGTCAAAAAAACTTTTACCCAAGATGTTTTGACAGGTTTGGGTAGCTTTGGTTCTTTATACTCACTAAAAAATATTATAAATAATTATGATGATCCTGTCTTAGTACAGTCGATTGATGGTGTTGGTACAAAGACAAAAGTCGCGGTAATGTGTGGTAAGTTTGAAAACCTTGGTTATGATCTTTTCTCAGCTGCGACAAATGATATTGTTGTAATGGGTGCCAAGCCAATTACGTTTCTAGATTATGTCGCGCATGATAAGCTTGACCCTGCAATTATGGAAGAGCTCGTCAAAGGGATGTCAAAAGCTTGTGCTGAGTGT…
FTT0894	FLH230091.01X	FtCD00039292	DQ681911	purCD	Fusion protein PurC/PurD	ATGCTTGATAAACAAATCATTGCTAATAATATAAAAAATGTTCTAAAATCAACAAATCTTGATATCAAGAATAAATATATAGGTAAAGTAAGAGATATGTACTTTACTGATGACAAAAGTATTTTGATATCTACAGATAGACAATCTGCTTTTGATAGATCTTTGGGTTTTATACCATTTAAGGGGCAAATCCTTGCACAATCATCAGTATGGTGGTTCAAAGAAACAGCACATATTGTCAAAAACCACTTTATAGACTCTCCAGATCCAAATGTTGTCATCGCGAGAAAGGCAAAAGTATTGCCAATTGAGTTTGTCGTTAGAGGTTATATAACTGGTTCAACTTCTACATCATTGTGGACACATTATAAAAACGGTAGCCGTGACTATTGTGGCAAT…
FTT0895	FLH155653.01X	FtCD00020887	AY774183	purN	phosphoribosylglycinamide formyltransferase	ATGTCTAAGCTAAATCTTGTTATATTAGGCTCTACGCGTGGGACTAATATGCAAGCTATAATAGATGCAATAGCAAATAAGCAGCTAAATGCTCAGATAAGCCTAGTAATTTCAAATAAGTCAGATGCTTATATATTACAAAGAGCAGCAGATTATAATATCCCAACTAAATATATAGCAGCTAAAGGTTTGACTAGAGAGCAGTATGATGAGCTAGTTGTTGCTGAAATCCAAAAATATAATCCAGATTTGATTTTGCTGATAGGCTTTATGCGTATTTTAAGCTCGGTGTTTATCAAAGCTTTTGAAGGTAAGATCTTAAATATTCATCCATCACTATTGCCAAAGCACCGAGGATTAATGGATTTGGCAGTGCATCAGTCAGTTATCGACGCTGGA…
FTT0896	FLH155948.01X	FtCD00020923	AY774193	purE	phosphoribosylaminoimidazole carboxylase,catalyic subunit	ATGAGTGTACAAGTTGGTGTAATAATGGGCTCTAAATCTGATTGGAGTACAATGAAAGAATGTTGTGATATCTTGGATAATTTAGGTATTGGTTATGAATGTGAAGTAGTGTCTGCTCATCGAACTCCAGATAAGATGTTTGACTATGCCGAAACTGCTAAAGAAAGAGGCCTTAAGGTTATAATAGCAGGAGCTGGCGGTGCTGCACATTTACCTGGAATGGTTGCGGCAAAAACTACTTTACCAGTATTAGGTGTACCAGTTAAATCAAGTACACTTAATGGCCAAGATAGTTTATTATCAATAGTACAGATGCCAGCGGGTATTCCAGTAGCTACTTTTGCAATTGGTATGGCAGGAGCAAAAAACGCGGCGCTTTTTGCTGCAAGTATCTTGCAA…
FTT0897	FLH155903.01X	FtCD00020917	DQ681912	purK	phosphoribosylaminoimidazole carboxylase, ATPase subunit	ATGAAAATAGGTATTATCGGAGCTGGACAACTTGCCAGGATGCTAAGCTTAGCAGGTACACCTTTAGGTTTAGAGTTTCATTGTCTTGGTAAAAATGGTGATTGTGCTGAAGAAGTTGTAAAAACTGTTACAGATATTGAGCTAACAAAGGTAAATGATGTTGTAGCTTGGGCAAAGCAGTTTGATGTGATAACTTTTGAAAATGAAAATATCTCTCATGAGCTTATCAAAGCTATAAATCATGAGGTGAGTGTGTATCCATCAGCTAAAGCTATAGCTATTTCTCAAGATCGTTTACTTGAGAAATCCTTTATGCAAGATCATGGTATTGCTACTGCAAAATTTGTAAATATCGATAGTTTGGCAAAATTGCAAAGTGCTGTTGATGATCATGGTCTG…
FTT0898c	FLH155790.01X	FtCD00020903	AY774215		hypothetical protein	ATGCAAACAATAGAAATAGGTAACAAAGCAGAACTACAAGCGTGTAAGTTTTTACACACTCAAGCATTAGAAATTCTAGCTCATAACTTCAAAGCTTTACCATATGGTGAAATAGATATCATTGCTTTGGATAAAGATACTCTAATCTTTATTGAAGTAAAATATCGCAGTAAGACCAAATTTGCTCAAGCTGAGGAAATGCTGACCTATAGCAAGCAACAAAAACTTGTAAACAGTGCAAGTATCTACTTACAACACAATCCTCAATACCAAGATTATCAGTGTCGTTTTGATTTAATTGCGATCAATGAAAGTAATATTAATTGGATAAAGAATGCTTTTGGAGTAAACTAG
FTT0899c	FLH153675.01X	FtCD00020671	DQ681913	prlC	Oligopeptidase A	ATGAATTCGATAATTGAAGACTCTAAATTACCTAAACTTGCAGAATTTAAAGTAAACGAAGTAAAGCCTGCTATAGATAAACTCTTTAGCCTAGCTCAAAGCAACCTTGAAAATGCTCTACAAACTCAAAATCCCAATTGGCAGACGTTACTAAAACTAGAGGAAGATGACGAGAAAATAAGTCAAGCTTTTTCAACAATCTCACATATGAATGCTGTTTGTAATTCTAAAGAACTGCGCGAAAGTTATGAATATGCGATAGCTAAACTTACTGACTACTATACCAAATTAGGACAAAATAAAGATTTATATGACCTCTACAAACAAATTCAAAAAGATAATTTAACTAATGAACAAGCTCAAGCAGTACGTAAAGCTATTATTGGCTTTGAGCAATCA…
FTT0900	FLH155806.01X	FtCD00020906	AY774223		conserved hypothetical membrane protein	ATGATGACTTTACAAGAAGAAAAAATACAAGCGCCAGTATTTTTTAAAGAATATGTCAAAGGTAGGTTTATACTTAATATAGGTGAGTATAATCATCCATTGATTTTATCAGCAACTCAAGTGCTTGAGTATCAAGATAAAATTGATGATATCCAAAGTATCAAAAAAAGTCATCTTGATCTTATCTTAGCGACTAATCCTGAAATAATACTCATAGGTACCGGTGAAAAACAACTTTTGCCTCCGCTTGAGATAATTAATCAAATCGCAAAAGCTGGTAAAAGTGTTGATTTTATGGCGAGTGATACTGCTTGTAAGACATATAATTTGCTTGTTAATGAAAATCGTAATGTTAGCTGTATCATCATTTAG
FTT0901	FLH151561.01X	FtCD00020475	DQ681914	lpnA	conserved hypothetical lipoprotein	ATGAAAAAAATAATTGAGCTTAGTCTTTTATCTTTATCAATCGCAGGTTTAGCGAGCTGTTCTACTCTAGGGTTAGGTGGCTCTGATGATGCAAAAGCTTCAGCTAAAGATACTGCTGCTGCTCAGACAGCTACTACTGAGCAAGCTGCTGCTGTATCTAAGCCAACTGCAAAAGTAAGTTTAAATAAACTTGGTCAGGATAAAATAAAAGCAACTGTATATACAACATACAATAATAACCCACAAGGAAGTGTAAGATTACAATGGCAGGCTCCAGAAGGTTCTAAGTGCCATGATACAAGCTTCCCAATTACTAAGTATGCTGAGAAGAACGATAAAACTTGGGCAACTGTAACAGTTAAGCAAGGTAATAACTTCTGTAGCGGTAAGTGGACAGCT…
FTT0902	FLH151609.01X	FtCD00020484	DQ681915		hypothetical protein	ATGAAAAACATTATCTCGTTATTAATGATATTCTCGATGTTAGTTGTACTTAGCTCATGTGCACCAACCACAGCTGAGCAGATACAACAATTACAACAGACGCAAACCAGCTTAAATAATCATGCATCAGCAAACCTTGCAAAGATAGCTGATCTACATACAAAAATTACTAACTATCGTCTCGAAGCAGACCAACTACAAAAGCAATCTAATAGTTTAGCTGATGATATTGCAAGTATTAATAAGGCTTATAGTAACTTTAAAGATCCTAATAGTGATAGTGCTATAGCTGTTAGTAAAGAGCTAGTACAAAGAACTCTACAAAAGGTTAAGATTGATGAGAAAATAAATCAGTATAGAACATTAGCCAATGATTACCAAGCACAAATAAATGATTTA…
FTT0903	FLH151624.01X	FtCD00020487	AY774922		hypothetical protein	ATGAAAAAGAACATTTCCACTTATTTGTTAATAATAGTTACTATTATTAGCTTTATGTTAGCTAGTTGTGCATCTAAAAGTGAAAAGTTAAATGAGCTAGAGCAGAGCCAGCAACAGCTACAAAAAGAGATGACTACTATTGAGAAAAAAGCTGATGAGGCTAAGCAAAGAGCCGATAAGTATGAAAAGCTTACTGAGAAATATAAAAACCTACTAGATCAGAAGCAACAAGAGCTTAATCAGCTCCAAGCTGCATATGCAAAAATAAGTAATAAAGATGAAGCCGCAGCTATAGCAGCTAAAAAAGATATTCAAGAAAAGCTTATAAAGGCTGCTCAAGATTCGGTACATTTACAAAAGAGATTAAAACGTTATACTAAAAAGGCGGATGTTTATAAA…
FTT0904	FLH151576.01X	FtCD00020479	AY774943	lpnB	conserved hypothetical lipoprotein	ATGAAAAAAATTCTAATCTTTACTCTAATGACGGCAACTTTAGCAGGCTGTAGTAAGTATAATGCTTTTATTGATAAGCTTTATGATTCTGATAATTCAATAAAGGTTAATCCTGATGATAACCTTGATAATCCAGATCAGGATGGTGAGGTTGTTTCCGAAGATAAGCCAACAGCAACGCTAAAATTAAAATATAAAGCTACGACGCATGAAATTGATGCTAGAATAATAACAAATTGGAATGGTGCGCCACAAGGAACAATATACCTAACTTGGGTAGCACCTAAAGATACTAATTGTTATAGTACATCATTCCCAATTACTAAATTTAATGAAACACAAGACTATACTGTTGATAGTCAAAGCGTCCTAAGTGATGATAAAGTTTGTAATGGGACA…
FTT0905	FLH155992.01X	FtCD00020930	AY774225		Type IV pili glycosylation protein	ATGATAGATGTGATAAATTACCTAAAAAAAATATCTTACGCTGATTATATTTTTTACTTTTTAACTTTAGCGATTTTCTTTGTGTTTTTAATGCCTTTTATGCATTATATTGTATTGAATTTAATCAAAGTAACATCAGGAAGTACTGTTAGCTATTTTAATGATACATTGGCAGCTAATATTTACCTATTTATAGATCGATACTATATCTTTTATACAGTACTTGGTGTTGCTAGTGTGGCTATTTTTCTAAATAAAAGAATATTTTCTGAGGTGATCGAATTATTTAGTAGTTTTAATTTGTCAATTAGATACGCTATTGCTTTATTTTTTATATTTGGGGTTATATCATCAGTTTTTGCGATATCTCCTTCTATAGCTTTTAAAGGCGTCAGCGTA…
FTT0906c	FLH153822.01X	FtCD00020691	DQ681916	topA	DNA topoisomerase I	ATGGCAAAAAATTTAGTAATCGTAGAGTCTCCAGCCAAAACTAAGACTATAAAAAAATACCTTGGTAACGAATTTGAAATATTAGCATCATTTGGACACGTACGCGAAATACCTTCCAAAGATACTTCTATCGATGTTAATGATAATTTTAAGATTAAGTTCACAACTAGTGAAAAAAGCAAAAAACATTTAGATGCAATCAAAAAAGCAGCTAAAGATGCTCAAAATATCTATCTCGCTACTGACCCAGATAGAGAAGGTGAAGCTATATCATGGCATGTACAAGAAGTATTAAAAAGTGCACGCTTACTTAAAGATAAAAATATCTATCGTGTCACATTTAACGAAATCACAAAATCAGCAGTTACAAATGCTATAGCAAATCCAAAAGAGTTATCT…
FTT0907	FLH155684.01X	FtCD00020891	AY774205	parA	chmomosome partition protein A	ATGAAGCAAAAAAATGCAAAAGTAGTTTCTTTGCTACAGCAAAAGGGTGGTTCGGGAAAAACTACTACAGCAATTAATATTGCCTGTGGTCTAAAAGAACTTGGCTATAGAGTTGCCATAATTGATATGGATAAGGATAAGCCTGACGCTTATATGTGGATGACTAAAAATAATCAGGAAAGTAATTTTGTCTATAGTCTTGACGAGAAAAACGTGCGTGAAAAAGTTATTGAGCTTAAGCAAGGCTTAGACTTTATTGTTATTGATACGCCACCTAATTTCCAAACTGCGGCTTTAAAGTCGGCATTATTATCTGACCTGGTAGTTATACCATGTTCACCTAGTGGTATGGACTTATCAGGACTTATCGAGGCAAAAGATTTGGCACTAACTGCCGAA…
FTT0908	FLH155840.01X	FtCD00020909	AY774185	parB	chromosome partition protein B	ATGGCTAAAAAAGTTTCATTAATGAACCGTAAAATCAATCATAAGATTCATGACACTGTTGCTCAAGAGAAAAAAGATATCCTTAGAGCTATGCAGCTACAAGAACTAAACGAACAGGCAAGCAAGGTTGGTCAGCTTTTTGAATTACCTTTGACTATTATAAAACCAGATGCCAATCAGCCGCGTAAGACATTTAAAAATATCGACTCTCTTGCTGATAGCATCAAAGAAAATGGCGTAATTCAGCCGATTATCGTTACTGCTAAAAAAGCTAATGGTATTCATTATATAATAGCTGGCGAACGAAGATATTTAGCAAGCAAACAGGCTGGTCTAACAACAATACCTTGTATAGTTCGACAAGAGGAGTCTGATGCAAATATTGTGCTATTACAGCTT…
FTT0909	FLH155745.01X	FtCD00020898	DQ681917		glutamine amidotransferase, class I	ATGAAAAAAGCAATTTTACAAACAGACCATATCCCAGAACATCGCCGTGGGGTTGCCGGAGGTAATTATCCGGAAATGTTTGCTAATCTTTTTTTTAAGTTATCTGTAGTGGTTGATTTTGATATTTTTGATGTAACTATGCAGGAGTATCCACAAGACTATGATATATATGATGGTTTTATCATAACGGGGAGTAAAGCTACAGCTTTTGATAATCTTGCTTGGATTATTAAATTAAAAACAGAAATAGTTAAGCTTCATGATAACCATAAAAAGATCATAGGTATTTGTTTTGGACATCAAATTTTAGCTCAAGCTCTAGGTGGTAGGGTTGAACGAGGTCCTAAAGGATTTGCTGTAGGAGTACGTAACGTTGAGATTTTAACTAGAAAGCCATGG…
FTT0910	FLH155467.01X	FtCD00020873	AY774172		hypothetical protein	ATGCGACAAATAAATAGATTGGTAGTTTTTGGAGATAGTCTTTTAGATAATGGTAATATCATGAAGACATTGGACATACCAGGTAAGCCATACCATGATGGCAGATTTTCAAATGGTCTAGTATCAACAGAGGTTTTAGCACAGATGTTAGCTAAAGATCAGAAACTATCAGAAATTAAACATAAAAATTATGCAATTGGAGGAGCGTTGACACATGGGACAAATCCATCATCATTGCTAAGATTTCACTCTTTTTCTGTATCAGAACAAATTATCAGATTTGAAAATGAAGAAGGAAGATTTGCTGATGATGACTTGGTTGTAATAAATGGTGGTGCAAATAATTTTATGTTTATGGTTTATAATGAGATTCCATATATAAACCTGGTTCCAAAATTC…
FTT0911	FLH155319.01X	FtCD00020861	AY774106		hypothetical protein	ATGAGTCAAGATTTAATAGCGCAGCTTGAGTTTATTAGTGAGCTTGAGAAGCTAAAAAGAGTTTACCGCCAAACTTGGTTACCATGTGATGGTGGTCGTCATGAGAATAGCGCTGAACATAGTTGGCAAGTTGCCCTAACTGCTAATATTTTGGCAGGGTATGCCACTGTCAGTTTAGATATTACTAAAGTTACTAAGATGCTTTTGATTCATGATATTGTTGAAATATATAGTGGTGATACTTTTGCGTTTGCTGATAGTCAAACATTAGACTCACAAAAACATAGCGAGCTTGCCGCAATTCAAAGAATAGCTAAAATTTTACCTAAACCTCAAGGACAACAGCTAGAGCAGCTATGGCTAGAGTTTGATAGTGCTGAAACAAATGAAGCAAAATTT…
[truncated: 677 more rows]
